# Supplementary material for: Generation of human appetite-regulating neurons and tanycytes from stem cells
Source: Research Square preprint supplement (doi:10.21203/rs.3.rs-4719097/v1), 2024-08-01
Supplement: Supplementary file 1 [file 6a6603d74424f1e2ff638900.xlsx]

## Sheet: d16_celltype_DEG
	gene	logFC	logCPM	F	PValue	FDR	comparison	cluster
PAX2	PAX2	7.02701	3.6626	1193.07	1.47631e-24	2.02565e-20	clusterOptic area progenitors_vs_others	Optic area progenitors
NR2F1	NR2F1	4.59279	4.61088	1076.5	1.14044e-23	7.82397e-20	clusterOptic area progenitors_vs_others	Optic area progenitors
CDH11	CDH11	3.69148	6.8613	1365.97	2.50319e-22	1.07547e-18	clusterOptic area progenitors_vs_others	Optic area progenitors
TRPM3	TRPM3	2.76112	7.96619	1104.17	3.13526e-22	1.07547e-18	clusterOptic area progenitors_vs_others	Optic area progenitors
NR2F1-AS1	NR2F1-AS1	4.16795	3.94343	786.82	4.35331e-22	1.19464e-18	clusterOptic area progenitors_vs_others	Optic area progenitors
CLVS1	CLVS1	3.46103	5.46766	755.025	7.61873e-22	1.74228e-18	clusterOptic area progenitors_vs_others	Optic area progenitors
ZIC1	ZIC1	5.63209	3.4919	725.232	2.3235e-21	4.5544e-18	clusterOptic area progenitors_vs_others	Optic area progenitors
CDON	CDON	3.25251	5.20124	605.725	1.6612e-20	2.84917e-17	clusterOptic area progenitors_vs_others	Optic area progenitors
FGF9	FGF9	2.74158	5.08662	527.037	9.63474e-20	1.46887e-16	clusterOptic area progenitors_vs_others	Optic area progenitors
FRRS1L	FRRS1L	3.54143	4.44385	515.224	1.304e-19	1.78922e-16	clusterOptic area progenitors_vs_others	Optic area progenitors
RARRES2	RARRES2	3.35584	4.40585	502.651	1.81282e-19	2.26124e-16	clusterOptic area progenitors_vs_others	Optic area progenitors
AC079298.3	AC079298.3	3.79905	4.32064	469.804	4.45458e-19	5.09344e-16	clusterOptic area progenitors_vs_others	Optic area progenitors
PRSS35	PRSS35	4.36783	3.17976	448.696	8.19555e-19	8.65009e-16	clusterOptic area progenitors_vs_others	Optic area progenitors
HMX1	HMX1	5.8892	2.40108	421.558	2.04842e-18	2.0076e-15	clusterOptic area progenitors_vs_others	Optic area progenitors
TPBG	TPBG	3.09282	4.41066	402.945	3.39061e-18	3.1015e-15	clusterOptic area progenitors_vs_others	Optic area progenitors
ROR1	ROR1	3.52209	3.92689	377.213	8.80969e-18	7.55486e-15	clusterOptic area progenitors_vs_others	Optic area progenitors
LGR4	LGR4	1.5894	6.85042	357.86	1.60637e-17	1.29653e-14	clusterOptic area progenitors_vs_others	Optic area progenitors
KIAA1217	KIAA1217	2.04198	7.4042	467.619	2.79768e-17	2.13261e-14	clusterOptic area progenitors_vs_others	Optic area progenitors
LINC01414	LINC01414	3.79933	3.11418	317.49	7.6142e-17	5.49866e-14	clusterOptic area progenitors_vs_others	Optic area progenitors
RAX	RAX	1.60387	7.23418	299.02	1.65079e-16	1.13252e-13	clusterOptic area progenitors_vs_others	Optic area progenitors
AC092958.1	AC092958.1	4.01015	3.55707	389.93	3.83868e-16	2.50812e-13	clusterOptic area progenitors_vs_others	Optic area progenitors
S1PR3	S1PR3	4.22699	2.33847	267.575	6.85855e-16	4.27755e-13	clusterOptic area progenitors_vs_others	Optic area progenitors
TGFB2	TGFB2	3.15555	5.25657	411.369	9.43509e-16	5.49382e-13	clusterOptic area progenitors_vs_others	Optic area progenitors
THSD7A	THSD7A	1.78433	6.18128	260.584	9.60948e-16	5.49382e-13	clusterOptic area progenitors_vs_others	Optic area progenitors
PTPRJ	PTPRJ	1.52007	6.90424	256.784	1.15826e-15	6.357e-13	clusterOptic area progenitors_vs_others	Optic area progenitors
SYT17	SYT17	2.57224	4.06478	255.543	1.23183e-15	6.50076e-13	clusterOptic area progenitors_vs_others	Optic area progenitors
DAPL1	DAPL1	6.19195	4.72352	900.093	1.93883e-15	9.85285e-13	clusterOptic area progenitors_vs_others	Optic area progenitors
CA2	CA2	3.56217	3.3349	252.092	2.21913e-15	1.08745e-12	clusterOptic area progenitors_vs_others	Optic area progenitors
KLHL14	KLHL14	3.78336	2.55506	243.145	2.31305e-15	1.09439e-12	clusterOptic area progenitors_vs_others	Optic area progenitors
PRDX6	PRDX6	1.08129	8.76894	242.055	2.44822e-15	1.09883e-12	clusterOptic area progenitors_vs_others	Optic area progenitors
PLPP3	PLPP3	2.26925	4.45689	241.788	2.4826e-15	1.09883e-12	clusterOptic area progenitors_vs_others	Optic area progenitors
MARCH3	MARCH3	2.22547	4.95058	234.864	3.58149e-15	1.53568e-12	clusterOptic area progenitors_vs_others	Optic area progenitors
ANOS1	ANOS1	3.39315	3.23422	233.663	3.82036e-15	1.58846e-12	clusterOptic area progenitors_vs_others	Optic area progenitors
TSPAN18	TSPAN18	1.52787	6.75836	233.648	4.08793e-15	1.64972e-12	clusterOptic area progenitors_vs_others	Optic area progenitors
ZBTB16	ZBTB16	1.9296	4.72111	221.862	7.32205e-15	2.87045e-12	clusterOptic area progenitors_vs_others	Optic area progenitors
CYP1B1	CYP1B1	5.4004	5.51759	1040.13	8.93674e-15	3.35567e-12	clusterOptic area progenitors_vs_others	Optic area progenitors
DIPK1C	DIPK1C	5.07621	1.34391	218.138	9.04889e-15	3.35567e-12	clusterOptic area progenitors_vs_others	Optic area progenitors
LAMP5	LAMP5	4.99689	1.79815	210.699	1.39487e-14	5.03658e-12	clusterOptic area progenitors_vs_others	Optic area progenitors
ADGRL3	ADGRL3	1.06275	9.39392	209.666	1.48283e-14	5.2169e-12	clusterOptic area progenitors_vs_others	Optic area progenitors
GLI2	GLI2	3.37431	2.52162	207.537	1.68342e-14	5.77455e-12	clusterOptic area progenitors_vs_others	Optic area progenitors
PKP4	PKP4	1.30457	6.92336	206.642	1.77627e-14	5.94445e-12	clusterOptic area progenitors_vs_others	Optic area progenitors
DOCK3	DOCK3	1.23565	7.30377	203.132	2.19702e-14	7.17744e-12	clusterOptic area progenitors_vs_others	Optic area progenitors
LHX2	LHX2	1.37449	6.98156	200.33	2.77708e-14	8.86146e-12	clusterOptic area progenitors_vs_others	Optic area progenitors
ROR2	ROR2	2.96056	3.27664	195.2	3.59554e-14	1.12124e-11	clusterOptic area progenitors_vs_others	Optic area progenitors
GULP1	GULP1	1.2276	6.89431	194.623	3.72924e-14	1.13709e-11	clusterOptic area progenitors_vs_others	Optic area progenitors
ZNF423	ZNF423	1.29921	6.60472	190.141	4.9685e-14	1.48202e-11	clusterOptic area progenitors_vs_others	Optic area progenitors
TCERG1L	TCERG1L	3.72179	3.8322	306.095	5.38998e-14	1.57353e-11	clusterOptic area progenitors_vs_others	Optic area progenitors
LRP2	LRP2	1.31316	7.52646	200.436	5.76667e-14	1.64843e-11	clusterOptic area progenitors_vs_others	Optic area progenitors
GAS1	GAS1	4.89702	1.34366	174.344	1.4351e-13	4.01858e-11	clusterOptic area progenitors_vs_others	Optic area progenitors
WFDC2	WFDC2	1.96758	6.06735	237.53	1.50802e-13	4.1383e-11	clusterOptic area progenitors_vs_others	Optic area progenitors
PAMR1	PAMR1	3.41534	2.1492	171.611	1.7388e-13	4.67805e-11	clusterOptic area progenitors_vs_others	Optic area progenitors
PRTG	PRTG	1.02033	7.41843	171.199	1.79017e-13	4.72364e-11	clusterOptic area progenitors_vs_others	Optic area progenitors
CDH6	CDH6	1.92275	7.63271	357.832	2.77247e-13	7.17755e-11	clusterOptic area progenitors_vs_others	Optic area progenitors
DIO3OS	DIO3OS	3.20371	2.84707	162.434	3.37907e-13	8.58598e-11	clusterOptic area progenitors_vs_others	Optic area progenitors
PLCH1	PLCH1	1.2062	6.75313	159.736	4.13329e-13	1.03114e-10	clusterOptic area progenitors_vs_others	Optic area progenitors
MAF	MAF	2.30625	4.68659	164.397	1.03694e-12	2.49612e-10	clusterOptic area progenitors_vs_others	Optic area progenitors
AC113386.1	AC113386.1	1.79992	3.9447	147.273	1.09045e-12	2.57967e-10	clusterOptic area progenitors_vs_others	Optic area progenitors
METRN	METRN	1.23392	7.25006	163.739	1.85388e-12	4.31137e-10	clusterOptic area progenitors_vs_others	Optic area progenitors
COL9A1	COL9A1	2.32181	5.56891	209.226	2.99923e-12	6.83679e-10	clusterOptic area progenitors_vs_others	Optic area progenitors
WNT5B	WNT5B	1.339	5.93655	135.007	3.03946e-12	6.83679e-10	clusterOptic area progenitors_vs_others	Optic area progenitors
MAN2A1	MAN2A1	1.22106	6.5726	136.95	3.57189e-12	7.90483e-10	clusterOptic area progenitors_vs_others	Optic area progenitors
CNTN3	CNTN3	2.77301	3.1278	132.611	3.74714e-12	8.16103e-10	clusterOptic area progenitors_vs_others	Optic area progenitors
MAGI1	MAGI1	0.925779	7.70886	130.857	4.37629e-12	9.38236e-10	clusterOptic area progenitors_vs_others	Optic area progenitors
CLEC19A	CLEC19A	4.7087	1.04108	127.911	5.70219e-12	1.20369e-09	clusterOptic area progenitors_vs_others	Optic area progenitors
AHCYL2	AHCYL2	0.892307	7.97322	126.986	6.20299e-12	1.28956e-09	clusterOptic area progenitors_vs_others	Optic area progenitors
CYP1B1-AS1	CYP1B1-AS1	2.64426	2.96545	126.442	6.51877e-12	1.33498e-09	clusterOptic area progenitors_vs_others	Optic area progenitors
EMID1	EMID1	2.64768	3.06123	126.205	6.66214e-12	1.34428e-09	clusterOptic area progenitors_vs_others	Optic area progenitors
CCNYL1	CCNYL1	1.00947	6.66702	125.423	7.15902e-12	1.42361e-09	clusterOptic area progenitors_vs_others	Optic area progenitors
SEMA5A	SEMA5A	1.64812	7.92335	227.717	8.5234e-12	1.67071e-09	clusterOptic area progenitors_vs_others	Optic area progenitors
PDE6B	PDE6B	2.4713	3.59236	120.299	1.15732e-11	2.23656e-09	clusterOptic area progenitors_vs_others	Optic area progenitors
NRIP1	NRIP1	1.95459	7.40072	291.263	1.1795e-11	2.24777e-09	clusterOptic area progenitors_vs_others	Optic area progenitors
JAZF1	JAZF1	1.00317	6.85625	119.565	1.24145e-11	2.33341e-09	clusterOptic area progenitors_vs_others	Optic area progenitors
SORCS2	SORCS2	2.58353	4.546	204.615	1.26456e-11	2.34472e-09	clusterOptic area progenitors_vs_others	Optic area progenitors
GPM6B	GPM6B	0.937845	7.26153	117.372	1.5343e-11	2.80695e-09	clusterOptic area progenitors_vs_others	Optic area progenitors
FIGN	FIGN	1.96802	7.59666	304.378	1.65276e-11	2.98388e-09	clusterOptic area progenitors_vs_others	Optic area progenitors
SH3D19	SH3D19	1.04034	6.5947	115.64	1.81783e-11	3.23928e-09	clusterOptic area progenitors_vs_others	Optic area progenitors
CA8	CA8	4.24102	1.43826	115.407	1.86022e-11	3.27231e-09	clusterOptic area progenitors_vs_others	Optic area progenitors
DIO3	DIO3	4.62541	5.38672	549.321	1.97569e-11	3.43146e-09	clusterOptic area progenitors_vs_others	Optic area progenitors
PLXDC2	PLXDC2	1.12474	7.73795	139.327	4.35148e-11	7.30797e-09	clusterOptic area progenitors_vs_others	Optic area progenitors
MOB3B	MOB3B	1.64231	5.1164	107.014	4.36742e-11	7.30797e-09	clusterOptic area progenitors_vs_others	Optic area progenitors
NOS1AP	NOS1AP	1.56887	5.03283	106.35	4.68313e-11	7.74183e-09	clusterOptic area progenitors_vs_others	Optic area progenitors
CDH20	CDH20	4.00236	5.03049	351.861	4.86337e-11	7.94408e-09	clusterOptic area progenitors_vs_others	Optic area progenitors
NEBL	NEBL	1.05767	6.75673	105.803	4.96164e-11	8.00925e-09	clusterOptic area progenitors_vs_others	Optic area progenitors
SIX6	SIX6	1.69798	7.17099	187.013	5.10227e-11	8.14049e-09	clusterOptic area progenitors_vs_others	Optic area progenitors
WASF3	WASF3	1.04862	6.03718	103.471	6.36436e-11	9.92334e-09	clusterOptic area progenitors_vs_others	Optic area progenitors
AFAP1L2	AFAP1L2	2.8417	2.56917	103.033	6.672e-11	1.02861e-08	clusterOptic area progenitors_vs_others	Optic area progenitors
LINC01776	LINC01776	1.45791	4.64499	101.829	7.60404e-11	1.15928e-08	clusterOptic area progenitors_vs_others	Optic area progenitors
MAP7	MAP7	2.61015	2.9872	100.634	8.66756e-11	1.3069e-08	clusterOptic area progenitors_vs_others	Optic area progenitors
IFITM3	IFITM3	0.969417	7.17582	103.269	9.421e-11	1.40506e-08	clusterOptic area progenitors_vs_others	Optic area progenitors
AF127577.2	AF127577.2	2.44919	3.05339	99.5146	9.81015e-11	1.43197e-08	clusterOptic area progenitors_vs_others	Optic area progenitors
SELENOP	SELENOP	2.00647	4.07102	103.28	1.00648e-10	1.45368e-08	clusterOptic area progenitors_vs_others	Optic area progenitors
DENND1A	DENND1A	0.788586	7.61615	99.0867	1.02885e-10	1.47051e-08	clusterOptic area progenitors_vs_others	Optic area progenitors
LMAN1	LMAN1	0.749633	8.23927	98.7083	1.07325e-10	1.51815e-08	clusterOptic area progenitors_vs_others	Optic area progenitors
HES1	HES1	1.74006	6.02667	149.263	1.08497e-10	1.51907e-08	clusterOptic area progenitors_vs_others	Optic area progenitors
PROM1	PROM1	3.60462	1.66647	98.3326	1.11936e-10	1.55139e-08	clusterOptic area progenitors_vs_others	Optic area progenitors
MMRN1	MMRN1	1.55797	4.95783	97.8253	1.18501e-10	1.60986e-08	clusterOptic area progenitors_vs_others	Optic area progenitors
DCDC1	DCDC1	1.47093	5.30516	97.1104	1.28464e-10	1.71131e-08	clusterOptic area progenitors_vs_others	Optic area progenitors
CPAMD8	CPAMD8	3.05836	4.67078	209.699	1.4267e-10	1.86569e-08	clusterOptic area progenitors_vs_others	Optic area progenitors
PPIC	PPIC	2.91716	1.87373	96.0984	1.44131e-10	1.86569e-08	clusterOptic area progenitors_vs_others	Optic area progenitors
APOLD1	APOLD1	1.67075	6.25069	115.553	1.5419e-10	1.94318e-08	clusterOptic area progenitors_vs_others	Optic area progenitors
CADPS2	CADPS2	1.34822	6.92691	148.878	1.54367e-10	1.94318e-08	clusterOptic area progenitors_vs_others	Optic area progenitors
SALL1	SALL1	2.3906	2.80679	93.8104	1.87622e-10	2.34033e-08	clusterOptic area progenitors_vs_others	Optic area progenitors
MYLK	MYLK	2.68324	4.34667	163.62	1.98547e-10	2.45429e-08	clusterOptic area progenitors_vs_others	Optic area progenitors
COL2A1	COL2A1	1.19423	6.63005	112.431	2.0667e-10	2.52622e-08	clusterOptic area progenitors_vs_others	Optic area progenitors
SNHG6	SNHG6	0.690437	8.04207	92.9254	2.08048e-10	2.52622e-08	clusterOptic area progenitors_vs_others	Optic area progenitors
TTC29	TTC29	2.27815	4.56633	108.109	2.14869e-10	2.56721e-08	clusterOptic area progenitors_vs_others	Optic area progenitors
CLDN3	CLDN3	2.19238	2.95757	92.6388	2.15166e-10	2.56721e-08	clusterOptic area progenitors_vs_others	Optic area progenitors
PARM1	PARM1	3.18555	3.15448	138.387	2.18546e-10	2.58506e-08	clusterOptic area progenitors_vs_others	Optic area progenitors
ADAMTS18	ADAMTS18	3.46174	2.90769	128.76	2.28306e-10	2.67742e-08	clusterOptic area progenitors_vs_others	Optic area progenitors
HAS2	HAS2	3.80913	1.37187	91.8525	2.36061e-10	2.7449e-08	clusterOptic area progenitors_vs_others	Optic area progenitors
NDST4	NDST4	1.78753	3.84844	90.7871	2.67914e-10	3.08912e-08	clusterOptic area progenitors_vs_others	Optic area progenitors
GASK1B	GASK1B	2.64406	2.80955	90.3309	2.82936e-10	3.23514e-08	clusterOptic area progenitors_vs_others	Optic area progenitors
PERP	PERP	1.44381	5.04708	89.1377	3.3817e-10	3.83473e-08	clusterOptic area progenitors_vs_others	Optic area progenitors
P3H2	P3H2	1.48758	4.68725	88.3699	3.70867e-10	4.17103e-08	clusterOptic area progenitors_vs_others	Optic area progenitors
LEF1	LEF1	1.33766	5.15915	86.8729	4.30852e-10	4.7794e-08	clusterOptic area progenitors_vs_others	Optic area progenitors
TMTC2	TMTC2	0.73034	8.9771	86.8528	4.31926e-10	4.7794e-08	clusterOptic area progenitors_vs_others	Optic area progenitors
ZIC2	ZIC2	8.03616	0.668964	100.23	5.28179e-10	5.75171e-08	clusterOptic area progenitors_vs_others	Optic area progenitors
C14orf39	C14orf39	1.0798	5.88709	84.2172	6.00369e-10	6.48635e-08	clusterOptic area progenitors_vs_others	Optic area progenitors
RNF175	RNF175	1.16924	6.03708	86.9347	6.21539e-10	6.66261e-08	clusterOptic area progenitors_vs_others	Optic area progenitors
ARL4C	ARL4C	1.40846	7.23247	148.893	6.28308e-10	6.68296e-08	clusterOptic area progenitors_vs_others	Optic area progenitors
PLEKHG1	PLEKHG1	0.797781	7.53273	83.5589	6.52632e-10	6.83569e-08	clusterOptic area progenitors_vs_others	Optic area progenitors
SNED1	SNED1	1.53114	4.18821	81.5495	8.44658e-10	8.71395e-08	clusterOptic area progenitors_vs_others	Optic area progenitors
RAB31	RAB31	1.07556	6.66635	93.9267	8.54594e-10	8.75066e-08	clusterOptic area progenitors_vs_others	Optic area progenitors
EML1	EML1	0.899884	6.03603	81.3646	8.65143e-10	8.79306e-08	clusterOptic area progenitors_vs_others	Optic area progenitors
CNTLN	CNTLN	0.861639	6.7433	80.8574	9.24151e-10	9.32373e-08	clusterOptic area progenitors_vs_others	Optic area progenitors
ID2	ID2	0.770782	7.46952	80.7192	9.40962e-10	9.42404e-08	clusterOptic area progenitors_vs_others	Optic area progenitors
CA14	CA14	1.76285	4.01817	80.5968	9.56122e-10	9.4655e-08	clusterOptic area progenitors_vs_others	Optic area progenitors
PCSK5	PCSK5	1.59444	6.17299	144.793	9.65188e-10	9.4655e-08	clusterOptic area progenitors_vs_others	Optic area progenitors
MEIS1	MEIS1	3.5195	2.77134	136.828	9.65797e-10	9.4655e-08	clusterOptic area progenitors_vs_others	Optic area progenitors
DENND1B	DENND1B	0.953769	6.33582	80.0778	1.0234e-09	9.95893e-08	clusterOptic area progenitors_vs_others	Optic area progenitors
OAF	OAF	3.19351	2.42566	82.9466	1.03926e-09	1.0042e-07	clusterOptic area progenitors_vs_others	Optic area progenitors
ZIC3	ZIC3	4.89304	1.38161	84.936	1.09214e-09	1.04065e-07	clusterOptic area progenitors_vs_others	Optic area progenitors
DKK1	DKK1	3.15219	2.0071	77.7761	1.38919e-09	1.31456e-07	clusterOptic area progenitors_vs_others	Optic area progenitors
PKDCC	PKDCC	2.30978	2.91339	77.2599	1.48912e-09	1.38994e-07	clusterOptic area progenitors_vs_others	Optic area progenitors
DTX4	DTX4	1.22323	5.1625	77.1733	1.50662e-09	1.39678e-07	clusterOptic area progenitors_vs_others	Optic area progenitors
OSBPL3	OSBPL3	1.49315	4.29707	75.5921	1.86824e-09	1.72041e-07	clusterOptic area progenitors_vs_others	Optic area progenitors
HMGN3	HMGN3	0.638002	8.8929	75.4217	1.91244e-09	1.74937e-07	clusterOptic area progenitors_vs_others	Optic area progenitors
MZT2A	MZT2A	0.718809	7.0313	74.765	2.09356e-09	1.88985e-07	clusterOptic area progenitors_vs_others	Optic area progenitors
GPM6A	GPM6A	0.680128	8.2767	74.2025	2.26331e-09	2.02973e-07	clusterOptic area progenitors_vs_others	Optic area progenitors
PKNOX2	PKNOX2	1.09748	5.52342	75.1432	2.40957e-09	2.13572e-07	clusterOptic area progenitors_vs_others	Optic area progenitors
LINC02246	LINC02246	1.84815	3.62006	73.6978	2.4282e-09	2.13572e-07	clusterOptic area progenitors_vs_others	Optic area progenitors
FREM1	FREM1	2.16489	3.62496	85.0925	2.54032e-09	2.18136e-07	clusterOptic area progenitors_vs_others	Optic area progenitors
SPHK1	SPHK1	3.38924	2.6514	89.4318	2.54368e-09	2.18136e-07	clusterOptic area progenitors_vs_others	Optic area progenitors
AKAP12	AKAP12	1.05411	7.27503	95.1057	3.03892e-09	2.5581e-07	clusterOptic area progenitors_vs_others	Optic area progenitors
DTL	DTL	1.33826	5.37339	72.0508	3.12864e-09	2.61757e-07	clusterOptic area progenitors_vs_others	Optic area progenitors
DUSP9	DUSP9	4.3478	0.886114	71.8057	3.17086e-09	2.63681e-07	clusterOptic area progenitors_vs_others	Optic area progenitors
CLU	CLU	1.00555	6.35494	74.5611	3.26172e-09	2.69602e-07	clusterOptic area progenitors_vs_others	Optic area progenitors
SDK2	SDK2	1.04835	5.88447	73.6346	3.34218e-09	2.74599e-07	clusterOptic area progenitors_vs_others	Optic area progenitors
CHST15	CHST15	2.09425	3.06328	70.6752	3.7281e-09	3.04484e-07	clusterOptic area progenitors_vs_others	Optic area progenitors
COL4A5	COL4A5	0.73798	7.60628	69.9267	4.15426e-09	3.37282e-07	clusterOptic area progenitors_vs_others	Optic area progenitors
PAX6	PAX6	4.20869	2.11082	123.437	4.2647e-09	3.43618e-07	clusterOptic area progenitors_vs_others	Optic area progenitors
SEMA6A	SEMA6A	0.907923	8.1365	85.6161	4.2896e-09	3.43618e-07	clusterOptic area progenitors_vs_others	Optic area progenitors
CYP46A1	CYP46A1	1.38881	4.30388	69.6776	4.30744e-09	3.43618e-07	clusterOptic area progenitors_vs_others	Optic area progenitors
NUAK1	NUAK1	1.38646	4.12971	68.5209	5.1024e-09	4.04682e-07	clusterOptic area progenitors_vs_others	Optic area progenitors
SFRP1	SFRP1	1.23924	8.25079	120.597	5.38426e-09	4.24583e-07	clusterOptic area progenitors_vs_others	Optic area progenitors
EPB41L2	EPB41L2	1.24807	5.44318	69.4626	6.35158e-09	4.98e-07	clusterOptic area progenitors_vs_others	Optic area progenitors
AC087564.1	AC087564.1	2.34171	3.02435	66.8369	6.5536e-09	5.08033e-07	clusterOptic area progenitors_vs_others	Optic area progenitors
PCLAF	PCLAF	0.956068	7.13094	72.1403	6.63295e-09	5.11296e-07	clusterOptic area progenitors_vs_others	Optic area progenitors
WWOX	WWOX	0.692732	8.18207	66.2526	7.15581e-09	5.45472e-07	clusterOptic area progenitors_vs_others	Optic area progenitors
FBLN7	FBLN7	1.58627	4.40562	65.6179	7.87774e-09	5.93904e-07	clusterOptic area progenitors_vs_others	Optic area progenitors
COL13A1	COL13A1	5.20859	0.870117	69.3453	8.04879e-09	6.03483e-07	clusterOptic area progenitors_vs_others	Optic area progenitors
LIX1	LIX1	1.07743	7.21902	85.8757	8.11902e-09	6.05441e-07	clusterOptic area progenitors_vs_others	Optic area progenitors
HEPH	HEPH	1.11052	5.11132	65.2859	8.28623e-09	6.1457e-07	clusterOptic area progenitors_vs_others	Optic area progenitors
RRM2	RRM2	1.29562	6.27301	74.6512	9.00042e-09	6.604e-07	clusterOptic area progenitors_vs_others	Optic area progenitors
FZD5	FZD5	1.03287	6.91271	81.416	9.33498e-09	6.78008e-07	clusterOptic area progenitors_vs_others	Optic area progenitors
MAFB	MAFB	1.51647	4.0787	64.5048	9.33923e-09	6.78008e-07	clusterOptic area progenitors_vs_others	Optic area progenitors
MIR99AHG	MIR99AHG	1.50381	8.37811	151.605	1.04282e-08	7.53083e-07	clusterOptic area progenitors_vs_others	Optic area progenitors
BOC	BOC	3.2616	1.36292	63.413	1.10585e-08	7.94418e-07	clusterOptic area progenitors_vs_others	Optic area progenitors
BRIP1	BRIP1	1.23795	6.30628	76.443	1.13192e-08	8.08907e-07	clusterOptic area progenitors_vs_others	Optic area progenitors
CFAP299	CFAP299	1.69818	4.73321	63.6921	1.17452e-08	8.35007e-07	clusterOptic area progenitors_vs_others	Optic area progenitors
QPRT	QPRT	0.755494	6.49067	62.2271	1.33174e-08	9.27557e-07	clusterOptic area progenitors_vs_others	Optic area progenitors
PARD3B	PARD3B	0.666207	7.95954	59.9841	1.90591e-08	1.30256e-06	clusterOptic area progenitors_vs_others	Optic area progenitors
MED12L	MED12L	0.927968	5.6747	59.9769	1.90812e-08	1.30256e-06	clusterOptic area progenitors_vs_others	Optic area progenitors
PPM1H	PPM1H	2.4086	4.77684	114.714	2.08684e-08	1.41649e-06	clusterOptic area progenitors_vs_others	Optic area progenitors
PREX2	PREX2	0.886472	6.18208	59.3998	2.09567e-08	1.41649e-06	clusterOptic area progenitors_vs_others	Optic area progenitors
MIR124-2HG	MIR124-2HG	4.58584	1.88814	62.6109	2.1185e-08	1.4249e-06	clusterOptic area progenitors_vs_others	Optic area progenitors
SLC1A3	SLC1A3	2.06185	2.92513	59.2869	2.13461e-08	1.42873e-06	clusterOptic area progenitors_vs_others	Optic area progenitors
UBE3D	UBE3D	0.931588	5.91861	58.9362	2.26062e-08	1.50573e-06	clusterOptic area progenitors_vs_others	Optic area progenitors
TMEM132D	TMEM132D	3.59685	6.61086	316.558	2.31223e-08	1.52529e-06	clusterOptic area progenitors_vs_others	Optic area progenitors
FGF8	FGF8	6.25928	2.59901	131.228	2.32983e-08	1.52955e-06	clusterOptic area progenitors_vs_others	Optic area progenitors
YAP1	YAP1	0.730996	7.15157	58.3719	2.48042e-08	1.61298e-06	clusterOptic area progenitors_vs_others	Optic area progenitors
KIF18B	KIF18B	2.11777	4.97975	58.0158	2.70014e-08	1.73173e-06	clusterOptic area progenitors_vs_others	Optic area progenitors
CLYBL	CLYBL	1.24882	4.41654	57.7437	2.75233e-08	1.7565e-06	clusterOptic area progenitors_vs_others	Optic area progenitors
NQO2	NQO2	1.01303	5.34882	57.5706	2.83273e-08	1.79944e-06	clusterOptic area progenitors_vs_others	Optic area progenitors
DACH1	DACH1	0.726463	8.58912	62.1098	3.02077e-08	1.90128e-06	clusterOptic area progenitors_vs_others	Optic area progenitors
ARHGEF26	ARHGEF26	1.26308	4.46452	56.74	3.25528e-08	2.03953e-06	clusterOptic area progenitors_vs_others	Optic area progenitors
RFC3	RFC3	0.954743	6.85032	63.5176	3.44231e-08	2.1469e-06	clusterOptic area progenitors_vs_others	Optic area progenitors
SLC7A8	SLC7A8	1.94684	2.9661	57.2362	3.47291e-08	2.15619e-06	clusterOptic area progenitors_vs_others	Optic area progenitors
NUP62CL	NUP62CL	1.17356	5.02217	55.7015	3.88092e-08	2.39865e-06	clusterOptic area progenitors_vs_others	Optic area progenitors
LRIG1	LRIG1	1.19246	4.86672	55.0104	4.36799e-08	2.68759e-06	clusterOptic area progenitors_vs_others	Optic area progenitors
CRNDE	CRNDE	1.55645	4.26799	54.0177	5.18569e-08	3.14444e-06	clusterOptic area progenitors_vs_others	Optic area progenitors
SRGAP2C	SRGAP2C	1.3001	4.6486	53.9994	5.20216e-08	3.14444e-06	clusterOptic area progenitors_vs_others	Optic area progenitors
NHSL1	NHSL1	0.646213	7.01374	53.6586	5.52061e-08	3.31745e-06	clusterOptic area progenitors_vs_others	Optic area progenitors
SEMA6A-AS1	SEMA6A-AS1	0.998018	6.31703	57.9177	5.53673e-08	3.31745e-06	clusterOptic area progenitors_vs_others	Optic area progenitors
CCDC148	CCDC148	1.21107	4.71096	53.398	5.77821e-08	3.44708e-06	clusterOptic area progenitors_vs_others	Optic area progenitors
TTYH2	TTYH2	1.754	2.93017	52.727	6.50267e-08	3.86247e-06	clusterOptic area progenitors_vs_others	Optic area progenitors
SFRP2	SFRP2	5.20399	8.12429	318.436	6.60111e-08	3.90404e-06	clusterOptic area progenitors_vs_others	Optic area progenitors
PRPSAP1	PRPSAP1	0.975823	5.66299	52.5868	6.66595e-08	3.92547e-06	clusterOptic area progenitors_vs_others	Optic area progenitors
SULF2	SULF2	1.03206	4.9463	52.4319	6.85162e-08	4.00047e-06	clusterOptic area progenitors_vs_others	Optic area progenitors
BMP7	BMP7	1.07863	5.39727	52.317	6.99277e-08	4.04763e-06	clusterOptic area progenitors_vs_others	Optic area progenitors
ELAVL4	ELAVL4	5.60448	6.22854	2410.66	8.86409e-29	1.21624e-24	clusterSTMN2+ neurons_vs_others	STMN2+ neurons
SOX2-OT	SOX2-OT	3.12758	9.49711	2243.2	2.50557e-28	1.71895e-24	clusterSTMN2+ neurons_vs_others	STMN2+ neurons
SCG3	SCG3	4.36468	6.29027	2131.04	4.90672e-28	2.24417e-24	clusterSTMN2+ neurons_vs_others	STMN2+ neurons
KCNJ3	KCNJ3	5.40682	5.73459	1922.3	2.04777e-27	7.02435e-24	clusterSTMN2+ neurons_vs_others	STMN2+ neurons
TAGLN3	TAGLN3	4.29946	6.67993	2030.27	4.31427e-27	1.18392e-23	clusterSTMN2+ neurons_vs_others	STMN2+ neurons
STMN2	STMN2	5.73735	9.32954	4562.36	8.40585e-27	1.92228e-23	clusterSTMN2+ neurons_vs_others	STMN2+ neurons
RTN1	RTN1	3.00259	7.90897	1654.94	1.89545e-26	3.71534e-23	clusterSTMN2+ neurons_vs_others	STMN2+ neurons
ELAVL3	ELAVL3	3.56812	6.82077	1501.7	7.23963e-26	1.17054e-22	clusterSTMN2+ neurons_vs_others	STMN2+ neurons
DLL3	DLL3	3.79337	6.20714	1478.94	7.67794e-26	1.17054e-22	clusterSTMN2+ neurons_vs_others	STMN2+ neurons
AC068308.1	AC068308.1	4.0611	6.09065	1462.4	1.04241e-25	1.31403e-22	clusterSTMN2+ neurons_vs_others	STMN2+ neurons
MIAT	MIAT	2.82801	7.19857	1445.4	1.05344e-25	1.31403e-22	clusterSTMN2+ neurons_vs_others	STMN2+ neurons
OTP	OTP	5.47873	5.00028	1426.95	1.25759e-25	1.43795e-22	clusterSTMN2+ neurons_vs_others	STMN2+ neurons
KCNH8	KCNH8	2.94304	7.03123	1386.41	1.87063e-25	1.85504e-22	clusterSTMN2+ neurons_vs_others	STMN2+ neurons
RBP1	RBP1	2.6925	7.64748	1385.23	1.89276e-25	1.85504e-22	clusterSTMN2+ neurons_vs_others	STMN2+ neurons
KIF5C	KIF5C	2.53922	7.4638	1257.2	7.18993e-25	6.23976e-22	clusterSTMN2+ neurons_vs_others	STMN2+ neurons
AC125613.1	AC125613.1	2.87113	6.84745	1256.11	7.27616e-25	6.23976e-22	clusterSTMN2+ neurons_vs_others	STMN2+ neurons
HES6	HES6	3.08806	6.39583	1172.92	1.86532e-24	1.50553e-21	clusterSTMN2+ neurons_vs_others	STMN2+ neurons
RAB3C	RAB3C	2.98801	6.3529	1130.16	3.10484e-24	2.36675e-21	clusterSTMN2+ neurons_vs_others	STMN2+ neurons
PAK5	PAK5	2.91056	5.93243	1094.57	4.81512e-24	3.47728e-21	clusterSTMN2+ neurons_vs_others	STMN2+ neurons
NELL2	NELL2	2.2337	8.4304	1079.51	5.82143e-24	3.99379e-21	clusterSTMN2+ neurons_vs_others	STMN2+ neurons
SLCO5A1	SLCO5A1	3.66029	5.56931	1064.28	7.0722e-24	4.58054e-21	clusterSTMN2+ neurons_vs_others	STMN2+ neurons
PEG10	PEG10	1.92928	9.57972	1061.34	7.34541e-24	4.58054e-21	clusterSTMN2+ neurons_vs_others	STMN2+ neurons
SNAP25	SNAP25	3.87867	5.22012	1057.66	7.7039e-24	4.58054e-21	clusterSTMN2+ neurons_vs_others	STMN2+ neurons
TUBB3	TUBB3	2.06799	9.77536	1054.63	8.01202e-24	4.58054e-21	clusterSTMN2+ neurons_vs_others	STMN2+ neurons
MAP6	MAP6	2.09205	7.05041	1049.37	8.57988e-24	4.70898e-21	clusterSTMN2+ neurons_vs_others	STMN2+ neurons
PTPRN2	PTPRN2	2.13042	7.90014	1030.27	1.10326e-23	5.82222e-21	clusterSTMN2+ neurons_vs_others	STMN2+ neurons
CRYBG3	CRYBG3	2.52404	6.06776	948.717	3.40618e-23	1.73097e-20	clusterSTMN2+ neurons_vs_others	STMN2+ neurons
ELAVL2	ELAVL2	2.81428	6.72676	1031.17	3.85121e-23	1.88723e-20	clusterSTMN2+ neurons_vs_others	STMN2+ neurons
CDKN1C	CDKN1C	2.29287	7.30273	937.886	4.13425e-23	1.95607e-20	clusterSTMN2+ neurons_vs_others	STMN2+ neurons
DLL1	DLL1	3.8094	5.20354	928.53	4.56855e-23	2.04846e-20	clusterSTMN2+ neurons_vs_others	STMN2+ neurons
EYS	EYS	2.48941	6.19004	927.649	4.62811e-23	2.04846e-20	clusterSTMN2+ neurons_vs_others	STMN2+ neurons
MLLT11	MLLT11	2.2484	8.13173	984.021	6.80127e-23	2.91626e-20	clusterSTMN2+ neurons_vs_others	STMN2+ neurons
GRM8	GRM8	3.58215	5.51136	870.536	1.10065e-22	4.57637e-20	clusterSTMN2+ neurons_vs_others	STMN2+ neurons
GRIA4	GRIA4	3.62663	5.32326	877.105	1.42074e-22	5.73352e-20	clusterSTMN2+ neurons_vs_others	STMN2+ neurons
SCN3A	SCN3A	3.25916	6.40965	1075.71	1.54886e-22	5.80358e-20	clusterSTMN2+ neurons_vs_others	STMN2+ neurons
NMNAT2	NMNAT2	3.9766	5.22103	848.406	1.56285e-22	5.80358e-20	clusterSTMN2+ neurons_vs_others	STMN2+ neurons
MIR7-3HG	MIR7-3HG	4.99885	4.55158	848.32	1.56499e-22	5.80358e-20	clusterSTMN2+ neurons_vs_others	STMN2+ neurons
NALCN	NALCN	3.84704	4.56016	839.703	1.79826e-22	6.2984e-20	clusterSTMN2+ neurons_vs_others	STMN2+ neurons
CHGB	CHGB	2.93795	5.4477	839.411	1.8068e-22	6.2984e-20	clusterSTMN2+ neurons_vs_others	STMN2+ neurons
CSRNP3	CSRNP3	1.80887	7.97598	837.54	1.8625e-22	6.2984e-20	clusterSTMN2+ neurons_vs_others	STMN2+ neurons
GDAP1L1	GDAP1L1	2.86053	5.7833	836.897	1.88204e-22	6.2984e-20	clusterSTMN2+ neurons_vs_others	STMN2+ neurons
TLCD3B	TLCD3B	3.52212	5.31961	831.481	2.05584e-22	6.71622e-20	clusterSTMN2+ neurons_vs_others	STMN2+ neurons
POU6F2	POU6F2	3.68797	5.05659	828.849	2.14642e-22	6.84909e-20	clusterSTMN2+ neurons_vs_others	STMN2+ neurons
NSG1	NSG1	2.81558	6.40046	896.951	2.43311e-22	7.58742e-20	clusterSTMN2+ neurons_vs_others	STMN2+ neurons
GAB2	GAB2	1.81921	7.73098	805.989	3.13929e-22	9.57203e-20	clusterSTMN2+ neurons_vs_others	STMN2+ neurons
VGF	VGF	4.21311	4.73513	799.67	3.49364e-22	1.03054e-19	clusterSTMN2+ neurons_vs_others	STMN2+ neurons
DNER	DNER	4.26058	4.84336	784.349	4.5433e-22	1.29872e-19	clusterSTMN2+ neurons_vs_others	STMN2+ neurons
PPFIA2	PPFIA2	2.10776	6.73395	770.32	5.8043e-22	1.59287e-19	clusterSTMN2+ neurons_vs_others	STMN2+ neurons
TUBA1A	TUBA1A	1.57737	11.1316	770.318	5.80448e-22	1.59287e-19	clusterSTMN2+ neurons_vs_others	STMN2+ neurons
SOX4	SOX4	1.52439	9.77932	765.597	6.30931e-22	1.69745e-19	clusterSTMN2+ neurons_vs_others	STMN2+ neurons
ACVR2A	ACVR2A	1.84585	6.78119	714.805	1.5992e-21	4.21975e-19	clusterSTMN2+ neurons_vs_others	STMN2+ neurons
PTPRO	PTPRO	2.49806	6.51706	753.913	1.74566e-21	4.49564e-19	clusterSTMN2+ neurons_vs_others	STMN2+ neurons
ZNF804B	ZNF804B	5.06494	5.45449	1068.35	1.85411e-21	4.6255e-19	clusterSTMN2+ neurons_vs_others	STMN2+ neurons
DLGAP2	DLGAP2	5.28947	6.19205	1653.84	1.89478e-21	4.64254e-19	clusterSTMN2+ neurons_vs_others	STMN2+ neurons
INSM1	INSM1	5.26799	3.8761	701.975	2.04316e-21	4.91828e-19	clusterSTMN2+ neurons_vs_others	STMN2+ neurons
MTSS1	MTSS1	1.95145	6.6603	698.443	2.18741e-21	5.17473e-19	clusterSTMN2+ neurons_vs_others	STMN2+ neurons
SNAP91	SNAP91	2.60981	5.84773	688.913	2.63376e-21	6.12504e-19	clusterSTMN2+ neurons_vs_others	STMN2+ neurons
RAB3B	RAB3B	2.34281	5.70354	687.957	2.68366e-21	6.13708e-19	clusterSTMN2+ neurons_vs_others	STMN2+ neurons
GAP43	GAP43	5.23373	7.52924	2343.31	4.47499e-21	1.00658e-18	clusterSTMN2+ neurons_vs_others	STMN2+ neurons
CELF4	CELF4	3.83684	5.83287	1010.42	5.08213e-21	1.12471e-18	clusterSTMN2+ neurons_vs_others	STMN2+ neurons
PEX5L	PEX5L	3.38675	5.60298	779.398	5.23974e-21	1.14118e-18	clusterSTMN2+ neurons_vs_others	STMN2+ neurons
SYT1	SYT1	1.62334	10.1167	641.866	6.84139e-21	1.44416e-18	clusterSTMN2+ neurons_vs_others	STMN2+ neurons
TUBB2B	TUBB2B	1.48431	9.11347	638.207	7.38914e-21	1.53616e-18	clusterSTMN2+ neurons_vs_others	STMN2+ neurons
CRMP1	CRMP1	1.58284	7.57828	635.004	7.90733e-21	1.61823e-18	clusterSTMN2+ neurons_vs_others	STMN2+ neurons
AL445623.2	AL445623.2	3.16744	5.11706	639.517	8.01978e-21	1.61823e-18	clusterSTMN2+ neurons_vs_others	STMN2+ neurons
CNTNAP4	CNTNAP4	4.30764	4.25427	631.339	8.54857e-21	1.69993e-18	clusterSTMN2+ neurons_vs_others	STMN2+ neurons
RAB3A	RAB3A	3.98861	3.80424	629.588	8.87432e-21	1.73949e-18	clusterSTMN2+ neurons_vs_others	STMN2+ neurons
TMEM178B	TMEM178B	1.56691	8.01892	616.925	1.16654e-20	2.25439e-18	clusterSTMN2+ neurons_vs_others	STMN2+ neurons
RUNDC3B	RUNDC3B	3.87146	4.38889	612.925	1.27324e-20	2.4264e-18	clusterSTMN2+ neurons_vs_others	STMN2+ neurons
FYN	FYN	1.52847	7.63403	609.895	1.36099e-20	2.52353e-18	clusterSTMN2+ neurons_vs_others	STMN2+ neurons
FRY	FRY	2.07085	6.01137	603.85	1.55602e-20	2.84669e-18	clusterSTMN2+ neurons_vs_others	STMN2+ neurons
SRRM3	SRRM3	3.96598	4.56187	597.188	1.85205e-20	3.34369e-18	clusterSTMN2+ neurons_vs_others	STMN2+ neurons
TERF2IP	TERF2IP	1.45908	7.83789	594.614	1.91409e-20	3.39091e-18	clusterSTMN2+ neurons_vs_others	STMN2+ neurons
MAPT	MAPT	4.45882	5.64816	1070.11	1.92764e-20	3.39091e-18	clusterSTMN2+ neurons_vs_others	STMN2+ neurons
KIF5A	KIF5A	2.03911	5.96023	589.658	2.14181e-20	3.71998e-18	clusterSTMN2+ neurons_vs_others	STMN2+ neurons
ATP1A3	ATP1A3	3.73934	4.57545	588.06	2.2213e-20	3.80981e-18	clusterSTMN2+ neurons_vs_others	STMN2+ neurons
RIT2	RIT2	5.03301	3.92021	586.193	2.31819e-20	3.9269e-18	clusterSTMN2+ neurons_vs_others	STMN2+ neurons
PWRN1	PWRN1	1.83246	6.49644	584.455	2.41244e-20	4.03671e-18	clusterSTMN2+ neurons_vs_others	STMN2+ neurons
DPYSL3	DPYSL3	2.47897	6.98515	847.537	2.60443e-20	4.30547e-18	clusterSTMN2+ neurons_vs_others	STMN2+ neurons
SCN3B	SCN3B	3.10619	4.45002	579.179	2.72464e-20	4.45057e-18	clusterSTMN2+ neurons_vs_others	STMN2+ neurons
ATP8A1	ATP8A1	2.19566	5.79707	577.668	2.82183e-20	4.53612e-18	clusterSTMN2+ neurons_vs_others	STMN2+ neurons
CELF3	CELF3	3.54612	4.29309	577.344	2.84314e-20	4.53612e-18	clusterSTMN2+ neurons_vs_others	STMN2+ neurons
PTPRD	PTPRD	1.82957	8.48504	653.861	3.32541e-20	5.2446e-18	clusterSTMN2+ neurons_vs_others	STMN2+ neurons
MAP1B	MAP1B	1.28427	10.4516	565.794	3.72807e-20	5.81282e-18	clusterSTMN2+ neurons_vs_others	STMN2+ neurons
TSPAN7	TSPAN7	3.38175	4.52863	560.099	4.26924e-20	6.58182e-18	clusterSTMN2+ neurons_vs_others	STMN2+ neurons
GNG3	GNG3	2.39387	5.92137	558.894	4.39423e-20	6.69925e-18	clusterSTMN2+ neurons_vs_others	STMN2+ neurons
NFASC	NFASC	3.18902	4.50376	557.867	4.50387e-20	6.79094e-18	clusterSTMN2+ neurons_vs_others	STMN2+ neurons
ISL1	ISL1	4.54779	7.06817	1855.75	4.58168e-20	6.83318e-18	clusterSTMN2+ neurons_vs_others	STMN2+ neurons
GNAO1	GNAO1	2.70218	5.44301	554.723	4.85793e-20	7.16728e-18	clusterSTMN2+ neurons_vs_others	STMN2+ neurons
Z99774.1	Z99774.1	3.30205	4.54773	553.218	5.03799e-20	7.35386e-18	clusterSTMN2+ neurons_vs_others	STMN2+ neurons
TOX	TOX	1.53049	8.80599	546.257	5.96854e-20	8.62046e-18	clusterSTMN2+ neurons_vs_others	STMN2+ neurons
RCAN2	RCAN2	2.47789	5.391	539.743	7.00747e-20	1.00156e-17	clusterSTMN2+ neurons_vs_others	STMN2+ neurons
PHACTR1	PHACTR1	1.79956	7.12106	540.04	7.16572e-20	1.01362e-17	clusterSTMN2+ neurons_vs_others	STMN2+ neurons
KIAA0408	KIAA0408	2.2436	5.63475	538.242	7.27331e-20	1.01834e-17	clusterSTMN2+ neurons_vs_others	STMN2+ neurons
KALRN	KALRN	1.85456	7.9721	623.062	7.72068e-20	1.07005e-17	clusterSTMN2+ neurons_vs_others	STMN2+ neurons
DLX5	DLX5	3.6956	4.48467	534.362	8.01189e-20	1.09931e-17	clusterSTMN2+ neurons_vs_others	STMN2+ neurons
EPHB1	EPHB1	1.8736	6.05763	533.254	8.23731e-20	1.11905e-17	clusterSTMN2+ neurons_vs_others	STMN2+ neurons
SOX11	SOX11	1.52982	9.03134	528.855	9.20166e-20	1.2378e-17	clusterSTMN2+ neurons_vs_others	STMN2+ neurons
GNG2	GNG2	1.6072	7.67955	523.65	1.05013e-19	1.39891e-17	clusterSTMN2+ neurons_vs_others	STMN2+ neurons
ATCAY	ATCAY	2.73143	5.85386	618.996	1.38596e-19	1.81246e-17	clusterSTMN2+ neurons_vs_others	STMN2+ neurons
KLC1	KLC1	1.49037	7.17218	512.847	1.38699e-19	1.81246e-17	clusterSTMN2+ neurons_vs_others	STMN2+ neurons
L1CAM	L1CAM	2.86269	4.39775	510.138	1.48853e-19	1.9268e-17	clusterSTMN2+ neurons_vs_others	STMN2+ neurons
L1TD1	L1TD1	3.67915	4.33338	507.778	1.58346e-19	2.03052e-17	clusterSTMN2+ neurons_vs_others	STMN2+ neurons
CDK5R1	CDK5R1	2.90014	4.6416	505.465	1.68283e-19	2.13797e-17	clusterSTMN2+ neurons_vs_others	STMN2+ neurons
AC090709.1	AC090709.1	2.02649	5.69617	504.496	1.72643e-19	2.17324e-17	clusterSTMN2+ neurons_vs_others	STMN2+ neurons
PPP1R1A	PPP1R1A	2.49077	5.58514	520.63	1.86395e-19	2.32502e-17	clusterSTMN2+ neurons_vs_others	STMN2+ neurons
RGS16	RGS16	3.45328	4.11906	498.643	2.01692e-19	2.49317e-17	clusterSTMN2+ neurons_vs_others	STMN2+ neurons
NYAP2	NYAP2	5.36824	3.96495	561.311	2.14949e-19	2.63332e-17	clusterSTMN2+ neurons_vs_others	STMN2+ neurons
DLX1	DLX1	6.57543	3.52666	584.422	2.16992e-19	2.63482e-17	clusterSTMN2+ neurons_vs_others	STMN2+ neurons
PGM2L1	PGM2L1	1.99477	5.88932	490.765	2.4933e-19	2.94919e-17	clusterSTMN2+ neurons_vs_others	STMN2+ neurons
KIDINS220	KIDINS220	1.4127	7.69808	487.544	2.72165e-19	3.16473e-17	clusterSTMN2+ neurons_vs_others	STMN2+ neurons
MYT1	MYT1	4.77253	3.51041	480.77	3.27838e-19	3.71757e-17	clusterSTMN2+ neurons_vs_others	STMN2+ neurons
FRMD5	FRMD5	2.02917	6.84947	569.517	3.86328e-19	4.34493e-17	clusterSTMN2+ neurons_vs_others	STMN2+ neurons
ATP8A2	ATP8A2	2.64935	5.88363	587.474	3.99369e-19	4.45507e-17	clusterSTMN2+ neurons_vs_others	STMN2+ neurons
NKAIN2	NKAIN2	2.49581	7.49177	838.6	4.67427e-19	5.17223e-17	clusterSTMN2+ neurons_vs_others	STMN2+ neurons
BEX1	BEX1	1.47997	7.72293	466.641	4.8726e-19	5.30611e-17	clusterSTMN2+ neurons_vs_others	STMN2+ neurons
CD200	CD200	1.59657	6.33076	456.95	6.43677e-19	6.95425e-17	clusterSTMN2+ neurons_vs_others	STMN2+ neurons
PRDM12	PRDM12	6.91398	3.42704	535.256	6.50009e-19	6.96779e-17	clusterSTMN2+ neurons_vs_others	STMN2+ neurons
AKR1C1	AKR1C1	3.62151	3.99744	450.206	7.83883e-19	8.33772e-17	clusterSTMN2+ neurons_vs_others	STMN2+ neurons
CELF5	CELF5	2.0079	6.15962	448.918	8.14204e-19	8.51574e-17	clusterSTMN2+ neurons_vs_others	STMN2+ neurons
CDKN2D	CDKN2D	2.08562	5.49334	448.859	8.15621e-19	8.51574e-17	clusterSTMN2+ neurons_vs_others	STMN2+ neurons
BASP1	BASP1	1.22776	9.55513	448.709	8.19239e-19	8.51574e-17	clusterSTMN2+ neurons_vs_others	STMN2+ neurons
TMOD2	TMOD2	2.24127	5.3122	445.77	8.93752e-19	9.13114e-17	clusterSTMN2+ neurons_vs_others	STMN2+ neurons
CLCN5	CLCN5	1.54159	6.95567	445.595	8.98407e-19	9.13114e-17	clusterSTMN2+ neurons_vs_others	STMN2+ neurons
SYBU	SYBU	1.9092	5.6329	445.218	9.08516e-19	9.16599e-17	clusterSTMN2+ neurons_vs_others	STMN2+ neurons
CACNA1B	CACNA1B	3.65914	5.51766	754.277	9.68232e-19	9.69716e-17	clusterSTMN2+ neurons_vs_others	STMN2+ neurons
MYO1B	MYO1B	2.04772	6.72553	546.287	1.12787e-18	1.12141e-16	clusterSTMN2+ neurons_vs_others	STMN2+ neurons
COPG2	COPG2	1.36078	7.92059	435.768	1.20676e-18	1.19122e-16	clusterSTMN2+ neurons_vs_others	STMN2+ neurons
PPM1L	PPM1L	1.34592	7.67287	435.06	1.23295e-18	1.20838e-16	clusterSTMN2+ neurons_vs_others	STMN2+ neurons
SVOP	SVOP	7.99823	3.6231	609.698	1.28424e-18	1.24092e-16	clusterSTMN2+ neurons_vs_others	STMN2+ neurons
C4orf48	C4orf48	1.27074	8.46161	432.38	1.33791e-18	1.27483e-16	clusterSTMN2+ neurons_vs_others	STMN2+ neurons
SYT5	SYT5	4.04961	3.75974	428.701	1.49785e-18	1.39271e-16	clusterSTMN2+ neurons_vs_others	STMN2+ neurons
NRCAM	NRCAM	1.64546	7.95786	461.961	1.50151e-18	1.39271e-16	clusterSTMN2+ neurons_vs_others	STMN2+ neurons
GPC2	GPC2	1.9853	5.5976	428.606	1.50223e-18	1.39271e-16	clusterSTMN2+ neurons_vs_others	STMN2+ neurons
ZSWIM6	ZSWIM6	1.2588	8.60557	414.93	2.30461e-18	2.12225e-16	clusterSTMN2+ neurons_vs_others	STMN2+ neurons
SYP	SYP	3.15758	4.26589	412.761	2.46951e-18	2.25894e-16	clusterSTMN2+ neurons_vs_others	STMN2+ neurons
NOVA1	NOVA1	1.32426	8.37751	402.625	3.42619e-18	3.0726e-16	clusterSTMN2+ neurons_vs_others	STMN2+ neurons
GNG8	GNG8	3.63111	3.55164	401.448	3.56074e-18	3.17252e-16	clusterSTMN2+ neurons_vs_others	STMN2+ neurons
CNIH2	CNIH2	1.91932	5.71805	400.538	3.66869e-18	3.24568e-16	clusterSTMN2+ neurons_vs_others	STMN2+ neurons
SRRM4	SRRM4	4.5711	6.30055	1222.98	3.70664e-18	3.24568e-16	clusterSTMN2+ neurons_vs_others	STMN2+ neurons
GAD2	GAD2	4.51602	3.52831	400.166	3.7138e-18	3.24568e-16	clusterSTMN2+ neurons_vs_others	STMN2+ neurons
TRIM36	TRIM36	2.69001	4.78204	396.691	4.16521e-18	3.61714e-16	clusterSTMN2+ neurons_vs_others	STMN2+ neurons
MTUS1	MTUS1	2.79489	4.55892	395.478	4.33621e-18	3.74196e-16	clusterSTMN2+ neurons_vs_others	STMN2+ neurons
CACNB2	CACNB2	1.40368	7.23773	395.19	4.37794e-18	3.75436e-16	clusterSTMN2+ neurons_vs_others	STMN2+ neurons
DPYSL2	DPYSL2	1.26925	8.40662	394.24	4.51875e-18	3.85104e-16	clusterSTMN2+ neurons_vs_others	STMN2+ neurons
SEZ6L2	SEZ6L2	1.55866	6.50159	392.461	4.79542e-18	4.0616e-16	clusterSTMN2+ neurons_vs_others	STMN2+ neurons
DLX2	DLX2	4.76506	3.10044	390.441	5.13167e-18	4.29339e-16	clusterSTMN2+ neurons_vs_others	STMN2+ neurons
LBH	LBH	1.7397	5.55478	386.569	5.84909e-18	4.83466e-16	clusterSTMN2+ neurons_vs_others	STMN2+ neurons
VAT1L	VAT1L	2.2362	5.27449	385.26	6.11539e-18	5.0245e-16	clusterSTMN2+ neurons_vs_others	STMN2+ neurons
ACTL6B	ACTL6B	4.4748	2.92279	381.003	7.07501e-18	5.71036e-16	clusterSTMN2+ neurons_vs_others	STMN2+ neurons
AC027288.3	AC027288.3	1.42602	6.46009	379.715	7.39629e-18	5.93477e-16	clusterSTMN2+ neurons_vs_others	STMN2+ neurons
BICDL1	BICDL1	2.67721	4.69913	378.726	7.65328e-18	6.10527e-16	clusterSTMN2+ neurons_vs_others	STMN2+ neurons
GDI1	GDI1	1.39895	6.3201	377.941	7.86433e-18	6.23737e-16	clusterSTMN2+ neurons_vs_others	STMN2+ neurons
CCDC112	CCDC112	1.45456	6.52895	369.075	1.07317e-17	8.36647e-16	clusterSTMN2+ neurons_vs_others	STMN2+ neurons
CEP170	CEP170	1.21798	7.83986	367.285	1.14366e-17	8.86564e-16	clusterSTMN2+ neurons_vs_others	STMN2+ neurons
GABRB3	GABRB3	2.4063	7.24145	711.055	1.29206e-17	9.90408e-16	clusterSTMN2+ neurons_vs_others	STMN2+ neurons
PRMT8	PRMT8	3.66705	3.59732	362.557	1.35477e-17	1.03271e-15	clusterSTMN2+ neurons_vs_others	STMN2+ neurons
PHACTR3	PHACTR3	3.48902	3.79157	361.363	1.44293e-17	1.09383e-15	clusterSTMN2+ neurons_vs_others	STMN2+ neurons
NSG2	NSG2	5.34207	3.38784	390.557	1.57027e-17	1.18383e-15	clusterSTMN2+ neurons_vs_others	STMN2+ neurons
SOX1-OT	SOX1-OT	3.12422	4.49874	357.071	1.6533e-17	1.23961e-15	clusterSTMN2+ neurons_vs_others	STMN2+ neurons
ABCA5	ABCA5	1.7446	6.36611	358.587	1.70198e-17	1.26917e-15	clusterSTMN2+ neurons_vs_others	STMN2+ neurons
XPR1	XPR1	1.1602	7.90825	355.299	1.76425e-17	1.30694e-15	clusterSTMN2+ neurons_vs_others	STMN2+ neurons
SCN2A	SCN2A	3.2025	4.40813	378.579	1.77167e-17	1.30694e-15	clusterSTMN2+ neurons_vs_others	STMN2+ neurons
SHTN1	SHTN1	1.39721	6.6808	352.659	1.94453e-17	1.4192e-15	clusterSTMN2+ neurons_vs_others	STMN2+ neurons
RNF24	RNF24	1.53669	6.78687	354.3	1.99375e-17	1.43993e-15	clusterSTMN2+ neurons_vs_others	STMN2+ neurons
STXBP1	STXBP1	2.04221	5.14755	351.437	2.03463e-17	1.46163e-15	clusterSTMN2+ neurons_vs_others	STMN2+ neurons
KIF21B	KIF21B	3.09378	3.99862	347.754	2.33408e-17	1.66802e-15	clusterSTMN2+ neurons_vs_others	STMN2+ neurons
PRKAR2B	PRKAR2B	1.50265	6.74464	343.178	2.77364e-17	1.95539e-15	clusterSTMN2+ neurons_vs_others	STMN2+ neurons
AC069228.1	AC069228.1	2.90055	4.45243	343.065	2.78554e-17	1.95539e-15	clusterSTMN2+ neurons_vs_others	STMN2+ neurons
APC	APC	1.25366	7.98426	339.475	3.19411e-17	2.20233e-15	clusterSTMN2+ neurons_vs_others	STMN2+ neurons
CHGA	CHGA	4.627	3.31277	349.446	3.25686e-17	2.23437e-15	clusterSTMN2+ neurons_vs_others	STMN2+ neurons
NDRG4	NDRG4	2.28992	4.99394	337.122	3.49646e-17	2.375e-15	clusterSTMN2+ neurons_vs_others	STMN2+ neurons
DSCAM	DSCAM	4.82789	5.61126	868.859	3.52091e-17	2.37982e-15	clusterSTMN2+ neurons_vs_others	STMN2+ neurons
CLASP2	CLASP2	1.12627	8.17583	330.147	4.58756e-17	3.05563e-15	clusterSTMN2+ neurons_vs_others	STMN2+ neurons
PTPRN	PTPRN	6.27242	3.04223	377.852	4.79855e-17	3.18072e-15	clusterSTMN2+ neurons_vs_others	STMN2+ neurons
IGFBPL1	IGFBPL1	3.61432	3.54474	328.803	4.83709e-17	3.19085e-15	clusterSTMN2+ neurons_vs_others	STMN2+ neurons
TMEM35A	TMEM35A	2.02332	5.19258	327.987	4.99549e-17	3.27958e-15	clusterSTMN2+ neurons_vs_others	STMN2+ neurons
TTC9B	TTC9B	6.5247	4.53171	668.255	5.69266e-17	3.70185e-15	clusterSTMN2+ neurons_vs_others	STMN2+ neurons
ASCL1	ASCL1	3.24085	6.74157	843.005	5.82516e-17	3.77014e-15	clusterSTMN2+ neurons_vs_others	STMN2+ neurons
VWC2	VWC2	3.63433	4.10342	396.996	6.0171e-17	3.87609e-15	clusterSTMN2+ neurons_vs_others	STMN2+ neurons
ANK2	ANK2	2.04813	8.71044	632.646	6.04724e-17	3.8773e-15	clusterSTMN2+ neurons_vs_others	STMN2+ neurons
VAT1	VAT1	1.41925	5.92406	315.65	8.209e-17	5.16677e-15	clusterSTMN2+ neurons_vs_others	STMN2+ neurons
NHLH2	NHLH2	6.43953	2.90925	360.583	8.49709e-17	5.32368e-15	clusterSTMN2+ neurons_vs_others	STMN2+ neurons
LINC02223	LINC02223	5.34663	3.48843	359.439	8.83269e-17	5.50879e-15	clusterSTMN2+ neurons_vs_others	STMN2+ neurons
ATP9A	ATP9A	1.36445	6.24877	312.045	9.52322e-17	5.91259e-15	clusterSTMN2+ neurons_vs_others	STMN2+ neurons
TMEM108	TMEM108	2.34813	4.96873	321.255	9.69906e-17	5.99463e-15	clusterSTMN2+ neurons_vs_others	STMN2+ neurons
ZC3H12C	ZC3H12C	1.69232	7.02486	392.116	1.03768e-16	6.38475e-15	clusterSTMN2+ neurons_vs_others	STMN2+ neurons
SYT4	SYT4	3.13337	4.47164	360.756	1.04324e-16	6.3903e-15	clusterSTMN2+ neurons_vs_others	STMN2+ neurons
SEPTIN3	SEPTIN3	1.91916	5.31	309.053	1.07858e-16	6.5774e-15	clusterSTMN2+ neurons_vs_others	STMN2+ neurons
GNG4	GNG4	1.49285	6.67324	305.836	1.23453e-16	7.49512e-15	clusterSTMN2+ neurons_vs_others	STMN2+ neurons
FGD3	FGD3	1.88527	5.34686	304.312	1.31675e-16	7.95909e-15	clusterSTMN2+ neurons_vs_others	STMN2+ neurons
CPEB3	CPEB3	1.52154	5.83217	303.36	1.37102e-16	8.22296e-15	clusterSTMN2+ neurons_vs_others	STMN2+ neurons
PKIA	PKIA	1.2702	7.21007	303.337	1.37239e-16	8.22296e-15	clusterSTMN2+ neurons_vs_others	STMN2+ neurons
SNCG	SNCG	4.39669	5.28848	712.607	1.4314e-16	8.53925e-15	clusterSTMN2+ neurons_vs_others	STMN2+ neurons
IL7	IL7	1.5367	5.48593	301.395	1.4908e-16	8.85508e-15	clusterSTMN2+ neurons_vs_others	STMN2+ neurons
SYT11	SYT11	1.1432	7.17911	301.145	1.50687e-16	8.91196e-15	clusterSTMN2+ neurons_vs_others	STMN2+ neurons
STARD4-AS1	STARD4-AS1	1.21485	7.10215	300.438	1.55321e-16	9.14663e-15	clusterSTMN2+ neurons_vs_others	STMN2+ neurons
FMN2	FMN2	1.62759	5.61892	299.811	1.59555e-16	9.35581e-15	clusterSTMN2+ neurons_vs_others	STMN2+ neurons
CLVS2	CLVS2	2.5166	4.55315	297.355	1.77384e-16	1.03569e-14	clusterSTMN2+ neurons_vs_others	STMN2+ neurons
ST8SIA3	ST8SIA3	3.97126	3.39009	295.35	1.93519e-16	1.12037e-14	clusterSTMN2+ neurons_vs_others	STMN2+ neurons
SLC44A5	SLC44A5	1.93439	8.35823	579.469	2.7905e-20	3.82884e-16	clusterTelencephalic progenitors_vs_others	Telencephalic progenitors
AP001825.1	AP001825.1	3.2062	4.51077	444.33	9.32863e-19	6.39991e-15	clusterTelencephalic progenitors_vs_others	Telencephalic progenitors
TRPM31	TRPM3	2.13714	7.96619	493.621	5.38554e-18	2.46317e-14	clusterTelencephalic progenitors_vs_others	Telencephalic progenitors
AP1S2	AP1S2	1.56494	8.78844	378.058	1.18275e-17	4.05712e-14	clusterTelencephalic progenitors_vs_others	Telencephalic progenitors
FOXG1	FOXG1	4.29437	3.15727	362.86	4.24994e-17	1.16627e-13	clusterTelencephalic progenitors_vs_others	Telencephalic progenitors
MAN1A1	MAN1A1	3.18132	6.07213	610.609	1.55479e-16	3.55555e-13	clusterTelencephalic progenitors_vs_others	Telencephalic progenitors
FSTL5	FSTL5	4.17426	3.36562	278.124	9.00956e-15	1.766e-11	clusterTelencephalic progenitors_vs_others	Telencephalic progenitors
SLC2A13	SLC2A13	1.87473	6.10757	212.358	1.26505e-14	2.16973e-11	clusterTelencephalic progenitors_vs_others	Telencephalic progenitors
WASF1	WASF1	1.60152	6.6713	206.893	1.74968e-14	2.66748e-11	clusterTelencephalic progenitors_vs_others	Telencephalic progenitors
LRFN5	LRFN5	1.95352	5.8553	183.315	7.7805e-14	1.06756e-10	clusterTelencephalic progenitors_vs_others	Telencephalic progenitors
ADGRL31	ADGRL3	0.984375	9.39392	172.099	1.67987e-13	2.09541e-10	clusterTelencephalic progenitors_vs_others	Telencephalic progenitors
CADPS21	CADPS2	2.06363	6.92691	276.438	6.3996e-13	7.31741e-10	clusterTelencephalic progenitors_vs_others	Telencephalic progenitors
AP002370.2	AP002370.2	3.4194	2.61673	141.453	1.75706e-12	1.8545e-09	clusterTelencephalic progenitors_vs_others	Telencephalic progenitors
FOXG1-AS1	FOXG1-AS1	4.93559	1.02216	133.388	3.50004e-12	3.43029e-09	clusterTelencephalic progenitors_vs_others	Telencephalic progenitors
MIR100HG	MIR100HG	1.26004	7.00701	128.706	5.30677e-12	4.67411e-09	clusterTelencephalic progenitors_vs_others	Telencephalic progenitors
MEF2C	MEF2C	1.6302	6.6779	150.295	5.45045e-12	4.67411e-09	clusterTelencephalic progenitors_vs_others	Telencephalic progenitors
CSMD3	CSMD3	3.34359	3.41247	127.936	5.95187e-12	4.80386e-09	clusterTelencephalic progenitors_vs_others	Telencephalic progenitors
SYNPR-AS1	SYNPR-AS1	3.71324	2.48468	124.191	8.02306e-12	6.1158e-09	clusterTelencephalic progenitors_vs_others	Telencephalic progenitors
SERPINE2	SERPINE2	1.76789	5.74099	121.726	1.01077e-11	7.29933e-09	clusterTelencephalic progenitors_vs_others	Telencephalic progenitors
SCN7A	SCN7A	4.05235	2.7633	120.603	1.12428e-11	7.71313e-09	clusterTelencephalic progenitors_vs_others	Telencephalic progenitors
PRTG1	PRTG	1.01142	7.41843	118.015	1.44153e-11	9.12995e-09	clusterTelencephalic progenitors_vs_others	Telencephalic progenitors
NOS2	NOS2	6.71914	1.78088	158.238	1.46388e-11	9.12995e-09	clusterTelencephalic progenitors_vs_others	Telencephalic progenitors
DACH2	DACH2	1.58173	8.07536	190.459	2.92451e-11	1.74466e-08	clusterTelencephalic progenitors_vs_others	Telencephalic progenitors
JMJD1C	JMJD1C	0.745348	9.37071	103.897	6.07931e-11	3.47559e-08	clusterTelencephalic progenitors_vs_others	Telencephalic progenitors
SOX2-OT1	SOX2-OT	0.902805	9.49711	102.406	7.20519e-11	3.82507e-08	clusterTelencephalic progenitors_vs_others	Telencephalic progenitors
FRAS1	FRAS1	1.83017	5.60784	124.777	7.24815e-11	3.82507e-08	clusterTelencephalic progenitors_vs_others	Telencephalic progenitors
PLCH11	PLCH1	1.22224	6.75313	100.149	9.14422e-11	4.64696e-08	clusterTelencephalic progenitors_vs_others	Telencephalic progenitors
KCTD12	KCTD12	3.29601	3.69549	170.949	1.04581e-10	5.12484e-08	clusterTelencephalic progenitors_vs_others	Telencephalic progenitors
GBE1	GBE1	1.30598	5.74692	97.6493	1.20875e-10	5.71905e-08	clusterTelencephalic progenitors_vs_others	Telencephalic progenitors
PIK3R1	PIK3R1	1.03246	6.9177	97.2739	1.26109e-10	5.76782e-08	clusterTelencephalic progenitors_vs_others	Telencephalic progenitors
PTCHD4	PTCHD4	3.89166	3.91603	234.678	1.43818e-10	6.36557e-08	clusterTelencephalic progenitors_vs_others	Telencephalic progenitors
PDLIM5	PDLIM5	0.7665	8.44077	93.2373	2.0059e-10	8.2302e-08	clusterTelencephalic progenitors_vs_others	Telencephalic progenitors
GALNT10	GALNT10	1.89527	4.26219	93.0957	2.0394e-10	8.2302e-08	clusterTelencephalic progenitors_vs_others	Telencephalic progenitors
TTN	TTN	1.64144	5.34851	87.7499	3.868e-10	1.51637e-07	clusterTelencephalic progenitors_vs_others	Telencephalic progenitors
ATP1B2	ATP1B2	1.66449	4.74672	87.422	4.02678e-10	1.53476e-07	clusterTelencephalic progenitors_vs_others	Telencephalic progenitors
ADAMTS9	ADAMTS9	2.15223	4.79894	108.325	5.55826e-10	2.06121e-07	clusterTelencephalic progenitors_vs_others	Telencephalic progenitors
RORA	RORA	0.896504	7.67385	84.1838	6.02908e-10	2.17697e-07	clusterTelencephalic progenitors_vs_others	Telencephalic progenitors
LMO3	LMO3	1.41436	6.83336	109.877	8.47864e-10	2.98296e-07	clusterTelencephalic progenitors_vs_others	Telencephalic progenitors
ZEB1	ZEB1	0.934118	8.40353	91.3679	9.06917e-10	3.11095e-07	clusterTelencephalic progenitors_vs_others	Telencephalic progenitors
SCN9A	SCN9A	3.35	6.10839	243.245	1.06806e-09	3.57436e-07	clusterTelencephalic progenitors_vs_others	Telencephalic progenitors
SCN1A	SCN1A	1.9774	6.2071	103.444	1.45931e-09	4.75712e-07	clusterTelencephalic progenitors_vs_others	Telencephalic progenitors
EFNB2	EFNB2	2.02641	4.09955	79.4848	1.49083e-09	4.75712e-07	clusterTelencephalic progenitors_vs_others	Telencephalic progenitors
GABRB2	GABRB2	4.29013	1.64411	86.0085	2.00274e-09	6.20789e-07	clusterTelencephalic progenitors_vs_others	Telencephalic progenitors
SLIT2	SLIT2	0.776753	9.94305	88.0397	2.03597e-09	6.20789e-07	clusterTelencephalic progenitors_vs_others	Telencephalic progenitors
AL355314.2	AL355314.2	2.65137	3.48961	74.7969	2.08434e-09	6.21721e-07	clusterTelencephalic progenitors_vs_others	Telencephalic progenitors
TRIM24	TRIM24	0.710281	8.58376	74.5615	2.15334e-09	6.28637e-07	clusterTelencephalic progenitors_vs_others	Telencephalic progenitors
SLC9A9	SLC9A9	2.04704	5.13613	107.168	2.21464e-09	6.33065e-07	clusterTelencephalic progenitors_vs_others	Telencephalic progenitors
CRABP2	CRABP2	0.896892	7.57468	74.3598	2.55706e-09	7.1603e-07	clusterTelencephalic progenitors_vs_others	Telencephalic progenitors
TLE4	TLE4	0.791633	8.24884	73.5198	2.65807e-09	7.29428e-07	clusterTelencephalic progenitors_vs_others	Telencephalic progenitors
BTG1	BTG1	0.795483	7.8374	72.8204	2.7463e-09	7.38862e-07	clusterTelencephalic progenitors_vs_others	Telencephalic progenitors
DLG2	DLG2	2.90902	9.70751	428.118	4.10812e-09	1.06423e-06	clusterTelencephalic progenitors_vs_others	Telencephalic progenitors
TMTC21	TMTC2	0.681432	8.9771	69.9992	4.11079e-09	1.06423e-06	clusterTelencephalic progenitors_vs_others	Telencephalic progenitors
SPARCL1	SPARCL1	2.19869	7.92954	223.931	4.52451e-09	1.14964e-06	clusterTelencephalic progenitors_vs_others	Telencephalic progenitors
ARX	ARX	5.25296	0.236548	68.4024	5.1923e-09	1.27334e-06	clusterTelencephalic progenitors_vs_others	Telencephalic progenitors
ZNF536	ZNF536	2.09916	7.48809	198.987	5.19692e-09	1.27334e-06	clusterTelencephalic progenitors_vs_others	Telencephalic progenitors
PAG1	PAG1	1.90178	5.30213	89.3029	5.43591e-09	1.30853e-06	clusterTelencephalic progenitors_vs_others	Telencephalic progenitors
ZNF462	ZNF462	0.687292	8.74074	67.1486	6.25484e-09	1.4797e-06	clusterTelencephalic progenitors_vs_others	Telencephalic progenitors
CELF2	CELF2	0.742351	8.31418	64.2157	9.76475e-09	2.27088e-06	clusterTelencephalic progenitors_vs_others	Telencephalic progenitors
SOX6	SOX6	1.02122	9.01599	98.7452	1.1115e-08	2.54183e-06	clusterTelencephalic progenitors_vs_others	Telencephalic progenitors
AFF2	AFF2	0.802523	7.96473	60.7126	1.73673e-08	3.9065e-06	clusterTelencephalic progenitors_vs_others	Telencephalic progenitors
MAMDC2	MAMDC2	1.32302	5.40985	60.0603	1.88254e-08	4.16619e-06	clusterTelencephalic progenitors_vs_others	Telencephalic progenitors
BMP5	BMP5	3.9292	1.2808	59.3342	2.11821e-08	4.61333e-06	clusterTelencephalic progenitors_vs_others	Telencephalic progenitors
ZNF521	ZNF521	0.734351	8.44065	59.3573	2.95299e-08	6.33092e-06	clusterTelencephalic progenitors_vs_others	Telencephalic progenitors
TOX3	TOX3	1.09439	7.97197	80.4245	3.65385e-08	7.48275e-06	clusterTelencephalic progenitors_vs_others	Telencephalic progenitors
ASCL11	ASCL1	1.86656	6.74157	76.7526	5.00778e-08	1.00652e-05	clusterTelencephalic progenitors_vs_others	Telencephalic progenitors
CCND1	CCND1	0.755333	7.96266	55.4257	5.12271e-08	1.00652e-05	clusterTelencephalic progenitors_vs_others	Telencephalic progenitors
LINC01619	LINC01619	0.918668	6.75227	54.0742	5.13493e-08	1.00652e-05	clusterTelencephalic progenitors_vs_others	Telencephalic progenitors
OTX2	OTX2	1.26532	5.75411	57.975	5.82246e-08	1.10958e-05	clusterTelencephalic progenitors_vs_others	Telencephalic progenitors
MDFIC	MDFIC	1.09868	5.99201	52.2768	7.04292e-08	1.32378e-05	clusterTelencephalic progenitors_vs_others	Telencephalic progenitors
PLEKHG11	PLEKHG1	0.750726	7.53273	51.8171	7.64453e-08	1.41744e-05	clusterTelencephalic progenitors_vs_others	Telencephalic progenitors
EYA1	EYA1	2.1271	4.64732	67.8289	7.82353e-08	1.43129e-05	clusterTelencephalic progenitors_vs_others	Telencephalic progenitors
CDH61	CDH6	1.11379	7.63271	75.1784	7.96091e-08	1.43726e-05	clusterTelencephalic progenitors_vs_others	Telencephalic progenitors
MAML3	MAML3	0.755648	7.84224	51.0744	1.14773e-07	2.01898e-05	clusterTelencephalic progenitors_vs_others	Telencephalic progenitors
SYNPR	SYNPR	5.38025	4.79108	255.104	1.21142e-07	2.10404e-05	clusterTelencephalic progenitors_vs_others	Telencephalic progenitors
CNTN6	CNTN6	0.866386	8.55943	65.6259	1.23627e-07	2.12036e-05	clusterTelencephalic progenitors_vs_others	Telencephalic progenitors
KCNH7	KCNH7	2.38103	6.69967	88.7381	1.31144e-07	2.22151e-05	clusterTelencephalic progenitors_vs_others	Telencephalic progenitors
GDF11	GDF11	1.02843	5.65364	48.3214	1.44927e-07	2.41795e-05	clusterTelencephalic progenitors_vs_others	Telencephalic progenitors
RUNX1T1	RUNX1T1	1.7013	5.81437	61.7418	1.46265e-07	2.41795e-05	clusterTelencephalic progenitors_vs_others	Telencephalic progenitors
ARPP21	ARPP21	2.99588	1.91485	48.4827	1.50938e-07	2.4655e-05	clusterTelencephalic progenitors_vs_others	Telencephalic progenitors
CNTN1	CNTN1	3.65446	7.00351	238.739	1.64812e-07	2.66045e-05	clusterTelencephalic progenitors_vs_others	Telencephalic progenitors
HSPB1	HSPB1	0.623063	7.91388	46.9931	1.86267e-07	2.97183e-05	clusterTelencephalic progenitors_vs_others	Telencephalic progenitors
SRGAP1	SRGAP1	1.07118	6.38387	48.236	2.04586e-07	3.22658e-05	clusterTelencephalic progenitors_vs_others	Telencephalic progenitors
CADM2	CADM2	2.92313	9.38435	230.161	2.08989e-07	3.25857e-05	clusterTelencephalic progenitors_vs_others	Telencephalic progenitors
MOSMO	MOSMO	0.838496	6.56024	45.7073	2.38537e-07	3.66487e-05	clusterTelencephalic progenitors_vs_others	Telencephalic progenitors
LINC01551	LINC01551	4.73596	5.27777	221.653	2.4039e-07	3.66487e-05	clusterTelencephalic progenitors_vs_others	Telencephalic progenitors
C12orf40	C12orf40	1.89221	3.94356	45.0875	2.7408e-07	4.08766e-05	clusterTelencephalic progenitors_vs_others	Telencephalic progenitors
CDC40	CDC40	0.87055	6.06407	42.9262	4.13659e-07	6.0381e-05	clusterTelencephalic progenitors_vs_others	Telencephalic progenitors
NKAIN3	NKAIN3	2.08191	9.04953	163.017	4.33694e-07	6.26391e-05	clusterTelencephalic progenitors_vs_others	Telencephalic progenitors
SHH	SHH	3.30569	2.19102	49.0742	4.50085e-07	6.43294e-05	clusterTelencephalic progenitors_vs_others	Telencephalic progenitors
NEDD4	NEDD4	1.00103	6.02846	42.3829	4.61817e-07	6.53256e-05	clusterTelencephalic progenitors_vs_others	Telencephalic progenitors
AC113386.11	AC113386.1	1.4899	3.9447	42.0314	4.9616e-07	6.80781e-05	clusterTelencephalic progenitors_vs_others	Telencephalic progenitors
AL161757.4	AL161757.4	2.1161	3.76296	48.531	5.31579e-07	7.22158e-05	clusterTelencephalic progenitors_vs_others	Telencephalic progenitors
LINC01876	LINC01876	0.78598	7.94048	48.4046	5.58806e-07	7.50103e-05	clusterTelencephalic progenitors_vs_others	Telencephalic progenitors
LIMCH1	LIMCH1	1.13941	6.15569	46.4336	5.63083e-07	7.50103e-05	clusterTelencephalic progenitors_vs_others	Telencephalic progenitors
MPP6	MPP6	1.16439	5.53492	41.4633	6.00333e-07	7.92035e-05	clusterTelencephalic progenitors_vs_others	Telencephalic progenitors
NPAS3	NPAS3	1.51865	9.354	119.212	6.12857e-07	8.00859e-05	clusterTelencephalic progenitors_vs_others	Telencephalic progenitors
PCDH9	PCDH9	1.30482	8.24759	87.2885	6.22108e-07	8.05278e-05	clusterTelencephalic progenitors_vs_others	Telencephalic progenitors
GRM3	GRM3	2.17506	5.41101	70.0788	7.69683e-07	9.86992e-05	clusterTelencephalic progenitors_vs_others	Telencephalic progenitors
LINC02281	LINC02281	4.24437	0.265278	39.7956	7.89983e-07	0.000100364	clusterTelencephalic progenitors_vs_others	Telencephalic progenitors
CACNA2D1	CACNA2D1	0.683417	7.86103	40.5783	8.26189e-07	0.000104001	clusterTelencephalic progenitors_vs_others	Telencephalic progenitors
NREP	NREP	0.525492	8.51149	39.0925	9.1742e-07	0.000113405	clusterTelencephalic progenitors_vs_others	Telencephalic progenitors
KCNQ1OT1	KCNQ1OT1	0.598265	8.38049	39.088	9.37119e-07	0.000114805	clusterTelencephalic progenitors_vs_others	Telencephalic progenitors
HMGCLL1	HMGCLL1	1.656	4.81845	41.0516	9.72313e-07	0.000118063	clusterTelencephalic progenitors_vs_others	Telencephalic progenitors
WSB1	WSB1	0.479855	8.44787	38.3228	1.08263e-06	0.000130305	clusterTelencephalic progenitors_vs_others	Telencephalic progenitors
GULP11	GULP1	0.721539	6.89431	38.0437	1.15021e-06	0.000136052	clusterTelencephalic progenitors_vs_others	Telencephalic progenitors
ADGRL2	ADGRL2	0.824029	8.96751	55.8902	1.16694e-06	0.000136852	clusterTelencephalic progenitors_vs_others	Telencephalic progenitors
LRRTM4	LRRTM4	1.79195	8.50041	117.054	1.31396e-06	0.000148999	clusterTelencephalic progenitors_vs_others	Telencephalic progenitors
CNTNAP3	CNTNAP3	1.78052	4.40448	37.406	1.47007e-06	0.000165335	clusterTelencephalic progenitors_vs_others	Telencephalic progenitors
HDAC9	HDAC9	1.43593	6.10412	55.6883	1.5028e-06	0.000167152	clusterTelencephalic progenitors_vs_others	Telencephalic progenitors
NOTCH2	NOTCH2	0.722161	6.6636	36.5671	1.59155e-06	0.000174702	clusterTelencephalic progenitors_vs_others	Telencephalic progenitors
AC090577.1	AC090577.1	3.4661	1.31118	36.4637	1.62863e-06	0.000176372	clusterTelencephalic progenitors_vs_others	Telencephalic progenitors
PDZRN4	PDZRN4	3.308	2.03437	40.9233	1.63247e-06	0.000176372	clusterTelencephalic progenitors_vs_others	Telencephalic progenitors
ITM2C	ITM2C	0.671101	7.44552	36.4289	1.65444e-06	0.000177349	clusterTelencephalic progenitors_vs_others	Telencephalic progenitors
RMST	RMST	0.923238	9.76027	65.1419	1.77794e-06	0.000189109	clusterTelencephalic progenitors_vs_others	Telencephalic progenitors
CDH9	CDH9	4.69584	0.286125	35.7329	1.9186e-06	0.000200004	clusterTelencephalic progenitors_vs_others	Telencephalic progenitors
SMC5-AS1	SMC5-AS1	1.25033	5.65109	40.8377	1.92409e-06	0.000200004	clusterTelencephalic progenitors_vs_others	Telencephalic progenitors
FEZF1-AS1	FEZF1-AS1	1.74132	5.61618	57.4241	1.97037e-06	0.000200738	clusterTelencephalic progenitors_vs_others	Telencephalic progenitors
GPC6	GPC6	0.927021	9.94038	65.2882	1.9724e-06	0.000200738	clusterTelencephalic progenitors_vs_others	Telencephalic progenitors
P2RY1	P2RY1	2.07349	3.43508	36.4162	1.98968e-06	0.000200738	clusterTelencephalic progenitors_vs_others	Telencephalic progenitors
ARL4A	ARL4A	1.88146	6.17577	76.9716	2.05865e-06	0.000206181	clusterTelencephalic progenitors_vs_others	Telencephalic progenitors
PCDH7	PCDH7	0.728854	9.06946	47.6764	2.25666e-06	0.000224375	clusterTelencephalic progenitors_vs_others	Telencephalic progenitors
PCDH15	PCDH15	2.14372	7.06413	103.105	2.27456e-06	0.000224527	clusterTelencephalic progenitors_vs_others	Telencephalic progenitors
SHROOM3	SHROOM3	0.60807	8.94092	38.5583	2.77288e-06	0.000267934	clusterTelencephalic progenitors_vs_others	Telencephalic progenitors
SYT12	SYT1	0.450351	10.1167	34.0787	2.80071e-06	0.000268731	clusterTelencephalic progenitors_vs_others	Telencephalic progenitors
AGAP1	AGAP1	0.56031	8.09283	34.0397	2.82613e-06	0.000269287	clusterTelencephalic progenitors_vs_others	Telencephalic progenitors
AL807761.4	AL807761.4	0.792797	6.41767	33.7879	2.99655e-06	0.000283557	clusterTelencephalic progenitors_vs_others	Telencephalic progenitors
FMNL2	FMNL2	0.56129	8.29118	33.8108	3.01915e-06	0.000283738	clusterTelencephalic progenitors_vs_others	Telencephalic progenitors
LRP21	LRP2	0.698645	7.52646	34.4546	3.05633e-06	0.000285278	clusterTelencephalic progenitors_vs_others	Telencephalic progenitors
SCN1A-AS1	SCN1A-AS1	2.7048	5.98892	82.5844	3.23525e-06	0.000299719	clusterTelencephalic progenitors_vs_others	Telencephalic progenitors
AHCYL21	AHCYL2	0.534813	7.97322	33.375	3.30025e-06	0.000301885	clusterTelencephalic progenitors_vs_others	Telencephalic progenitors
TCF7L1	TCF7L1	0.703537	7.26488	33.165	4.11097e-06	0.000369331	clusterTelencephalic progenitors_vs_others	Telencephalic progenitors
EDNRB	EDNRB	1.48836	6.64641	54.8457	4.11834e-06	0.000369331	clusterTelencephalic progenitors_vs_others	Telencephalic progenitors
AL008633.1	AL008633.1	0.610338	7.85927	32.9786	4.25892e-06	0.000378335	clusterTelencephalic progenitors_vs_others	Telencephalic progenitors
ISYNA1	ISYNA1	0.639901	7.11533	32.2833	4.27388e-06	0.000378335	clusterTelencephalic progenitors_vs_others	Telencephalic progenitors
CNKSR2	CNKSR2	0.813912	6.30375	32.1545	4.40764e-06	0.000387623	clusterTelencephalic progenitors_vs_others	Telencephalic progenitors
AGAP4	AGAP4	1.00132	5.24693	32.1284	4.43531e-06	0.000387623	clusterTelencephalic progenitors_vs_others	Telencephalic progenitors
MGST1	MGST1	1.04517	7.88606	53.2593	4.76243e-06	0.000410977	clusterTelencephalic progenitors_vs_others	Telencephalic progenitors
AL137009.1	AL137009.1	1.09889	4.78429	31.5131	5.14419e-06	0.000435956	clusterTelencephalic progenitors_vs_others	Telencephalic progenitors
MAP2K6	MAP2K6	0.662402	6.75752	31.5107	5.14721e-06	0.000435956	clusterTelencephalic progenitors_vs_others	Telencephalic progenitors
CALB1	CALB1	3.93631	1.88357	47.076	5.38395e-06	0.000453209	clusterTelencephalic progenitors_vs_others	Telencephalic progenitors
TAFA2	TAFA2	2.59157	7.01877	99.5795	5.63694e-06	0.000471613	clusterTelencephalic progenitors_vs_others	Telencephalic progenitors
MAPK10	MAPK10	0.576631	9.53415	36.4684	6.75123e-06	0.000554693	clusterTelencephalic progenitors_vs_others	Telencephalic progenitors
AC016822.1	AC016822.1	2.28109	9.94995	98.563	6.90615e-06	0.000564043	clusterTelencephalic progenitors_vs_others	Telencephalic progenitors
NAALAD2	NAALAD2	0.829186	5.75998	29.9461	7.56009e-06	0.000610188	clusterTelencephalic progenitors_vs_others	Telencephalic progenitors
SOX5	SOX5	0.519926	10.3245	35.0526	7.78035e-06	0.000624293	clusterTelencephalic progenitors_vs_others	Telencephalic progenitors
NECTIN3	NECTIN3	0.841429	6.02283	29.6624	8.11534e-06	0.000643645	clusterTelencephalic progenitors_vs_others	Telencephalic progenitors
AL078600.1	AL078600.1	2.37215	1.77939	29.3631	8.74899e-06	0.000689913	clusterTelencephalic progenitors_vs_others	Telencephalic progenitors
ESRRG	ESRRG	1.31382	6.47536	44.1471	9.16659e-06	0.00071463	clusterTelencephalic progenitors_vs_others	Telencephalic progenitors
KCTD8	KCTD8	2.75021	2.70412	33.6203	9.55259e-06	0.000740514	clusterTelencephalic progenitors_vs_others	Telencephalic progenitors
NFIB	NFIB	1.04969	6.59312	36.4542	1.09041e-05	0.000835838	clusterTelencephalic progenitors_vs_others	Telencephalic progenitors
CDK14	CDK14	0.526724	8.16507	28.4754	1.10787e-05	0.000844503	clusterTelencephalic progenitors_vs_others	Telencephalic progenitors
SERPINF1	SERPINF1	1.2812	3.91004	28.2563	1.15947e-05	0.000874127	clusterTelencephalic progenitors_vs_others	Telencephalic progenitors
ZBTB20	ZBTB20	0.832695	9.30045	46.4298	1.1954e-05	0.000896285	clusterTelencephalic progenitors_vs_others	Telencephalic progenitors
NKAIN3-IT1	NKAIN3-IT1	1.57683	3.9898	28.069	1.21674e-05	0.000907334	clusterTelencephalic progenitors_vs_others	Telencephalic progenitors
C5orf30	C5orf30	1.23388	4.83384	27.8701	1.28094e-05	0.000944937	clusterTelencephalic progenitors_vs_others	Telencephalic progenitors
GLIS3	GLIS3	1.03394	8.7565	52.8406	1.34861e-05	0.000989531	clusterTelencephalic progenitors_vs_others	Telencephalic progenitors
LRRC1	LRRC1	1.49707	3.70927	27.6156	1.36844e-05	0.00099874	clusterTelencephalic progenitors_vs_others	Telencephalic progenitors
MSI2	MSI2	0.438864	8.98385	27.5097	1.4067e-05	0.00101586	clusterTelencephalic progenitors_vs_others	Telencephalic progenitors
PLXDC21	PLXDC2	0.639293	7.73795	30.3926	1.44622e-05	0.00103893	clusterTelencephalic progenitors_vs_others	Telencephalic progenitors
AC073050.1	AC073050.1	1.03807	9.15804	54.5354	1.46697e-05	0.00104835	clusterTelencephalic progenitors_vs_others	Telencephalic progenitors
DOK6	DOK6	0.517409	8.7407	28.5412	1.47498e-05	0.00104861	clusterTelencephalic progenitors_vs_others	Telencephalic progenitors
MMRN11	MMRN1	1.22716	4.95783	27.2936	1.48839e-05	0.00105269	clusterTelencephalic progenitors_vs_others	Telencephalic progenitors
SPRED1	SPRED1	0.623339	6.8691	27.2038	1.52383e-05	0.00107156	clusterTelencephalic progenitors_vs_others	Telencephalic progenitors
USH2A	USH2A	1.80794	3.28681	27.1867	1.53068e-05	0.00107156	clusterTelencephalic progenitors_vs_others	Telencephalic progenitors
ZNF804A	ZNF804A	2.34065	5.92266	68.9713	1.58354e-05	0.00110293	clusterTelencephalic progenitors_vs_others	Telencephalic progenitors
NKX2-1	NKX2-1	0.659572	7.5899	28.7401	1.61206e-05	0.00111713	clusterTelencephalic progenitors_vs_others	Telencephalic progenitors
STARD4-AS11	STARD4-AS1	0.627966	7.10215	26.6693	1.75438e-05	0.00120964	clusterTelencephalic progenitors_vs_others	Telencephalic progenitors
DMD	DMD	0.744741	6.87756	28.0094	1.80815e-05	0.00123431	clusterTelencephalic progenitors_vs_others	Telencephalic progenitors
FBXL13	FBXL13	0.750786	5.95446	26.4892	1.8403e-05	0.00125004	clusterTelencephalic progenitors_vs_others	Telencephalic progenitors
SOCS2	SOCS2	1.46375	3.6619	26.4518	1.85868e-05	0.0012563	clusterTelencephalic progenitors_vs_others	Telencephalic progenitors
CDH10	CDH10	1.18617	5.34698	27.5218	1.89327e-05	0.00127341	clusterTelencephalic progenitors_vs_others	Telencephalic progenitors
PRDM16	PRDM16	0.86422	5.75206	26.2688	1.95163e-05	0.00129992	clusterTelencephalic progenitors_vs_others	Telencephalic progenitors
PCSK51	PCSK5	1.10688	6.17299	34.0818	1.97705e-05	0.00130679	clusterTelencephalic progenitors_vs_others	Telencephalic progenitors
SEMA3E	SEMA3E	2.94165	3.70864	48.7916	1.981e-05	0.00130679	clusterTelencephalic progenitors_vs_others	Telencephalic progenitors
ZNF827	ZNF827	0.489798	7.23588	26.1081	2.03736e-05	0.00133754	clusterTelencephalic progenitors_vs_others	Telencephalic progenitors
AL353784.1	AL353784.1	2.41671	4.64677	46.3694	2.18156e-05	0.00142539	clusterTelencephalic progenitors_vs_others	Telencephalic progenitors
AC079352.1	AC079352.1	4.15082	2.28382	26.2982	2.37365e-05	0.00153626	clusterTelencephalic progenitors_vs_others	Telencephalic progenitors
MLLT3	MLLT3	0.475133	8.22443	25.5009	2.39953e-05	0.00154572	clusterTelencephalic progenitors_vs_others	Telencephalic progenitors
TLE1	TLE1	0.803573	5.71069	25.3876	2.47452e-05	0.00158658	clusterTelencephalic progenitors_vs_others	Telencephalic progenitors
AL157778.1	AL157778.1	0.381874	8.84991	25.1681	2.62691e-05	0.00165582	clusterTelencephalic progenitors_vs_others	Telencephalic progenitors
STPG2-AS1	STPG2-AS1	2.62749	2.11896	24.8989	2.82777e-05	0.00176009	clusterTelencephalic progenitors_vs_others	Telencephalic progenitors
AC016723.1	AC016723.1	1.12384	5.79218	28.2723	2.83492e-05	0.00176009	clusterTelencephalic progenitors_vs_others	Telencephalic progenitors
EYA4	EYA4	2.85215	6.18178	65.1888	3.24046e-05	0.00199383	clusterTelencephalic progenitors_vs_others	Telencephalic progenitors
GABRG3-AS1	GABRG3-AS1	0.546438	7.38921	24.2399	3.39238e-05	0.00207798	clusterTelencephalic progenitors_vs_others	Telencephalic progenitors
UNC5C	UNC5C	1.56911	8.83004	61.3733	3.58673e-05	0.00218726	clusterTelencephalic progenitors_vs_others	Telencephalic progenitors
FAT3	FAT3	0.552532	9.06415	28.4248	3.61366e-05	0.00219394	clusterTelencephalic progenitors_vs_others	Telencephalic progenitors
AC011586.2	AC011586.2	3.99279	2.0886	42.7217	3.72706e-05	0.00224192	clusterTelencephalic progenitors_vs_others	Telencephalic progenitors
AC125613.11	AC125613.1	0.830467	6.84745	23.8888	3.74171e-05	0.00224192	clusterTelencephalic progenitors_vs_others	Telencephalic progenitors
CIRBP	CIRBP	0.339377	9.14686	23.7958	3.84048e-05	0.0022911	clusterTelencephalic progenitors_vs_others	Telencephalic progenitors
NFIA	NFIA	1.3248	6.6818	38.1043	3.91349e-05	0.00232455	clusterTelencephalic progenitors_vs_others	Telencephalic progenitors
YAP11	YAP1	0.596828	7.15157	23.6814	3.96603e-05	0.00233751	clusterTelencephalic progenitors_vs_others	Telencephalic progenitors
SOX2	SOX2	0.575913	8.02317	25.957	3.98309e-05	0.00233751	clusterTelencephalic progenitors_vs_others	Telencephalic progenitors
SMC5	SMC5	0.601368	7.14801	23.7731	4.02264e-05	0.00234871	clusterTelencephalic progenitors_vs_others	Telencephalic progenitors
AC092691.3	AC092691.3	2.61397	1.50392	23.5745	4.08726e-05	0.00237632	clusterTelencephalic progenitors_vs_others	Telencephalic progenitors
ERBIN	ERBIN	0.455134	7.93871	23.4447	4.23977e-05	0.00243368	clusterTelencephalic progenitors_vs_others	Telencephalic progenitors
PTX3	PTX3	1.7626	5.71914	37.8253	4.26633e-05	0.00243368	clusterTelencephalic progenitors_vs_others	Telencephalic progenitors
CELF2-AS2	CELF2-AS2	1.66379	3.18026	23.4158	4.27458e-05	0.00243368	clusterTelencephalic progenitors_vs_others	Telencephalic progenitors
GNG12-AS1	GNG12-AS1	1.65043	3.24467	24.2624	4.36528e-05	0.00245475	clusterTelencephalic progenitors_vs_others	Telencephalic progenitors
PURPL	PURPL	1.09723	4.84062	24.5052	4.38599e-05	0.00245633	clusterTelencephalic progenitors_vs_others	Telencephalic progenitors
RALYL	RALYL	0.765192	9.24851	36.484	4.47119e-05	0.00248897	clusterTelencephalic progenitors_vs_others	Telencephalic progenitors
KHDRBS2	KHDRBS2	1.53591	7.90141	450.552	1.14266e-18	1.56785e-14	clusterTuberal progenitors_vs_others	Tuberal progenitors
AC073529.1	AC073529.1	1.47283	6.15241	345.738	2.5178e-17	1.2402e-13	clusterTuberal progenitors_vs_others	Tuberal progenitors
MLLT31	MLLT3	1.16601	8.22443	338.085	3.36927e-17	1.2402e-13	clusterTuberal progenitors_vs_others	Tuberal progenitors
AC002460.2	AC002460.2	1.64373	6.08359	336.255	3.61548e-17	1.2402e-13	clusterTuberal progenitors_vs_others	Tuberal progenitors
CKAP2	CKAP2	1.30624	6.72061	328.722	4.85257e-17	1.33164e-13	clusterTuberal progenitors_vs_others	Tuberal progenitors
BCL2	BCL2	1.31597	7.32164	321.327	9.67133e-17	1.96871e-13	clusterTuberal progenitors_vs_others	Tuberal progenitors
C1orf61	C1orf61	2.57185	4.76779	310.763	1.00437e-16	1.96871e-13	clusterTuberal progenitors_vs_others	Tuberal progenitors
NHS	NHS	1.43346	6.39709	306.182	1.21669e-16	2.08678e-13	clusterTuberal progenitors_vs_others	Tuberal progenitors
SPC25	SPC25	1.89567	5.98786	323.358	1.6403e-16	2.50072e-13	clusterTuberal progenitors_vs_others	Tuberal progenitors
ARHGAP11B	ARHGAP11B	2.00996	5.26753	290.907	2.35166e-16	3.22672e-13	clusterTuberal progenitors_vs_others	Tuberal progenitors
PHLPP1	PHLPP1	0.954367	8.108	271.777	5.62136e-16	6.52871e-13	clusterTuberal progenitors_vs_others	Tuberal progenitors
PCLAF1	PCLAF	1.45192	7.13094	317.18	6.71765e-16	6.52871e-13	clusterTuberal progenitors_vs_others	Tuberal progenitors
POU3F1	POU3F1	1.59425	5.84018	267.944	6.73883e-16	6.52871e-13	clusterTuberal progenitors_vs_others	Tuberal progenitors
APOLD11	APOLD1	2.10619	6.25069	372.087	6.91129e-16	6.52871e-13	clusterTuberal progenitors_vs_others	Tuberal progenitors
CKAP2L	CKAP2L	2.27396	4.86226	266.74	7.13728e-16	6.52871e-13	clusterTuberal progenitors_vs_others	Tuberal progenitors
FUT9	FUT9	1.49065	5.73149	250.662	1.57329e-15	1.31776e-12	clusterTuberal progenitors_vs_others	Tuberal progenitors
SMC2	SMC2	1.27523	6.71351	249.931	1.63268e-15	1.31776e-12	clusterTuberal progenitors_vs_others	Tuberal progenitors
KIF18B1	KIF18B	2.72037	4.97975	241.159	2.77151e-15	2.11266e-12	clusterTuberal progenitors_vs_others	Tuberal progenitors
RAX1	RAX	1.12857	7.23418	234.607	3.63123e-15	2.62232e-12	clusterTuberal progenitors_vs_others	Tuberal progenitors
CCDC34	CCDC34	0.976784	7.06166	224.836	6.19718e-15	3.67143e-12	clusterTuberal progenitors_vs_others	Tuberal progenitors
AL078459.1	AL078459.1	1.0367	6.43648	224.723	6.23624e-15	3.67143e-12	clusterTuberal progenitors_vs_others	Tuberal progenitors
CEP128	CEP128	1.19434	6.56814	224.306	6.38327e-15	3.67143e-12	clusterTuberal progenitors_vs_others	Tuberal progenitors
CENPH	CENPH	1.31349	5.74391	223.568	6.65232e-15	3.67143e-12	clusterTuberal progenitors_vs_others	Tuberal progenitors
KIFC1	KIFC1	1.95125	5.07409	223.469	6.68944e-15	3.67143e-12	clusterTuberal progenitors_vs_others	Tuberal progenitors
C21orf58	C21orf58	1.45234	5.33098	216.584	9.89383e-15	5.0279e-12	clusterTuberal progenitors_vs_others	Tuberal progenitors
BUB1	BUB1	2.06369	5.03996	214.436	1.12046e-14	5.49066e-12	clusterTuberal progenitors_vs_others	Tuberal progenitors
SCN1A1	SCN1A	1.91962	6.2071	345.895	1.64042e-14	7.76145e-12	clusterTuberal progenitors_vs_others	Tuberal progenitors
RACGAP1	RACGAP1	1.67053	4.90568	204.271	2.04984e-14	9.37528e-12	clusterTuberal progenitors_vs_others	Tuberal progenitors
RTKN2	RTKN2	1.64491	5.56938	210.826	4.04715e-14	1.76148e-11	clusterTuberal progenitors_vs_others	Tuberal progenitors
RRM21	RRM2	1.66875	6.27301	252.86	4.1081e-14	1.76148e-11	clusterTuberal progenitors_vs_others	Tuberal progenitors
SIX3-AS1	SIX3-AS1	1.67559	5.2412	190.633	4.89647e-14	1.97601e-11	clusterTuberal progenitors_vs_others	Tuberal progenitors
KIF15	KIF15	1.8496	5.65202	246.328	5.98602e-14	2.28151e-11	clusterTuberal progenitors_vs_others	Tuberal progenitors
MAPK4	MAPK4	1.42844	5.64353	186.835	7.29591e-14	2.57536e-11	clusterTuberal progenitors_vs_others	Tuberal progenitors
MXD3	MXD3	1.74698	5.17378	185.31	9.63146e-14	3.22325e-11	clusterTuberal progenitors_vs_others	Tuberal progenitors
LINC01515	LINC01515	0.986575	7.23799	184.076	1.14392e-13	3.48795e-11	clusterTuberal progenitors_vs_others	Tuberal progenitors
RFC31	RFC3	1.28448	6.85032	222.953	1.25931e-13	3.75629e-11	clusterTuberal progenitors_vs_others	Tuberal progenitors
ANP32E	ANP32E	0.806558	7.75476	173.927	1.47755e-13	4.3135e-11	clusterTuberal progenitors_vs_others	Tuberal progenitors
TMEM38B	TMEM38B	0.881053	6.6475	173.371	1.53613e-13	4.39109e-11	clusterTuberal progenitors_vs_others	Tuberal progenitors
BRIP11	BRIP1	1.53819	6.30628	241.656	1.75013e-13	4.90072e-11	clusterTuberal progenitors_vs_others	Tuberal progenitors
KIF2C	KIF2C	1.8691	5.2641	206.369	1.84364e-13	5.05931e-11	clusterTuberal progenitors_vs_others	Tuberal progenitors
TMPO	TMPO	0.805806	7.98339	168.738	2.1336e-13	5.74022e-11	clusterTuberal progenitors_vs_others	Tuberal progenitors
UBE2T	UBE2T	1.29342	5.98995	177.353	2.21866e-13	5.85427e-11	clusterTuberal progenitors_vs_others	Tuberal progenitors
KCNQ3	KCNQ3	1.28105	6.20264	167.672	2.3036e-13	5.96373e-11	clusterTuberal progenitors_vs_others	Tuberal progenitors
POLQ	POLQ	1.59102	5.11039	166.619	2.48608e-13	6.2021e-11	clusterTuberal progenitors_vs_others	Tuberal progenitors
BRCA1	BRCA1	1.33651	5.5864	167.105	2.534e-13	6.20876e-11	clusterTuberal progenitors_vs_others	Tuberal progenitors
BUB1B	BUB1B	1.69457	5.30029	193.254	3.05995e-13	7.36588e-11	clusterTuberal progenitors_vs_others	Tuberal progenitors
WDR49	WDR49	1.70834	5.24438	197.739	3.27989e-13	7.75921e-11	clusterTuberal progenitors_vs_others	Tuberal progenitors
CEP135	CEP135	0.976615	6.04372	161.603	3.59419e-13	8.21932e-11	clusterTuberal progenitors_vs_others	Tuberal progenitors
Z94721.1	Z94721.1	1.35718	4.9143	155.301	5.79266e-13	1.28195e-10	clusterTuberal progenitors_vs_others	Tuberal progenitors
BRCA2	BRCA2	1.32942	5.38623	153.108	8.24764e-13	1.75964e-10	clusterTuberal progenitors_vs_others	Tuberal progenitors
CDCA2	CDCA2	1.8907	5.08186	182.936	8.33589e-13	1.75964e-10	clusterTuberal progenitors_vs_others	Tuberal progenitors
PLK1	PLK1	2.26249	4.89061	172.789	8.73074e-13	1.78798e-10	clusterTuberal progenitors_vs_others	Tuberal progenitors
MEGF10	MEGF10	1.48317	4.70768	149.532	9.10026e-13	1.81295e-10	clusterTuberal progenitors_vs_others	Tuberal progenitors
ORC6	ORC6	0.910462	6.2487	149.509	9.11697e-13	1.81295e-10	clusterTuberal progenitors_vs_others	Tuberal progenitors
GABRG3-AS11	GABRG3-AS1	0.801812	7.38921	148.845	9.6124e-13	1.85763e-10	clusterTuberal progenitors_vs_others	Tuberal progenitors
PARPBP	PARPBP	1.22196	5.39373	147.487	1.07184e-12	2.0426e-10	clusterTuberal progenitors_vs_others	Tuberal progenitors
NXPH2	NXPH2	2.07715	3.84735	146.549	1.15609e-12	2.14361e-10	clusterTuberal progenitors_vs_others	Tuberal progenitors
CENPP	CENPP	0.97592	6.6622	147.318	1.23476e-12	2.22923e-10	clusterTuberal progenitors_vs_others	Tuberal progenitors
MND1	MND1	1.06891	5.80158	144.445	1.37219e-12	2.44518e-10	clusterTuberal progenitors_vs_others	Tuberal progenitors
FBXO5	FBXO5	1.09752	5.67537	143.257	1.51291e-12	2.66137e-10	clusterTuberal progenitors_vs_others	Tuberal progenitors
GLYATL2	GLYATL2	1.08218	5.98338	141.276	1.78331e-12	3.0586e-10	clusterTuberal progenitors_vs_others	Tuberal progenitors
AC011447.3	AC011447.3	0.917129	6.2333	139.565	2.05847e-12	3.46155e-10	clusterTuberal progenitors_vs_others	Tuberal progenitors
FOXM1	FOXM1	1.4167	4.74614	139.363	2.09393e-12	3.46155e-10	clusterTuberal progenitors_vs_others	Tuberal progenitors
NCAPD2	NCAPD2	1.20241	5.39829	138.619	2.22989e-12	3.64241e-10	clusterTuberal progenitors_vs_others	Tuberal progenitors
ESCO2	ESCO2	1.57359	4.67216	137.961	2.35825e-12	3.80677e-10	clusterTuberal progenitors_vs_others	Tuberal progenitors
SALL3	SALL3	1.54112	4.60672	136.428	2.68878e-12	4.19236e-10	clusterTuberal progenitors_vs_others	Tuberal progenitors
SIX3	SIX3	0.784173	8.3033	135.4	2.93777e-12	4.52912e-10	clusterTuberal progenitors_vs_others	Tuberal progenitors
FANCI	FANCI	1.40393	5.85917	170.614	3.45966e-12	5.15978e-10	clusterTuberal progenitors_vs_others	Tuberal progenitors
CDC45	CDC45	1.58947	4.10367	132.535	3.77251e-12	5.56587e-10	clusterTuberal progenitors_vs_others	Tuberal progenitors
NCAPH	NCAPH	1.7506	4.65402	139.719	3.87051e-12	5.64971e-10	clusterTuberal progenitors_vs_others	Tuberal progenitors
DDAH1	DDAH1	0.931115	6.84883	139.137	4.05787e-12	5.79979e-10	clusterTuberal progenitors_vs_others	Tuberal progenitors
PIMREG	PIMREG	1.86412	4.79146	150.441	4.96718e-12	7.02626e-10	clusterTuberal progenitors_vs_others	Tuberal progenitors
LMNB1	LMNB1	0.835031	7.07696	129.188	5.08146e-12	7.11456e-10	clusterTuberal progenitors_vs_others	Tuberal progenitors
ATAD2	ATAD2	1.30467	6.49434	177.331	6.02073e-12	8.34448e-10	clusterTuberal progenitors_vs_others	Tuberal progenitors
MGME1	MGME1	1.15133	5.74347	140.24	6.39813e-12	8.77887e-10	clusterTuberal progenitors_vs_others	Tuberal progenitors
SPC24	SPC24	1.50204	4.93237	130.157	7.68103e-12	1.02434e-09	clusterTuberal progenitors_vs_others	Tuberal progenitors
LRP22	LRP2	0.83965	7.52646	131.306	7.68948e-12	1.02434e-09	clusterTuberal progenitors_vs_others	Tuberal progenitors
ANKRD20A1	ANKRD20A1	2.66401	3.20289	123.489	8.56528e-12	1.10654e-09	clusterTuberal progenitors_vs_others	Tuberal progenitors
NUP62CL1	NUP62CL	1.16647	5.02217	123.168	8.82605e-12	1.1185e-09	clusterTuberal progenitors_vs_others	Tuberal progenitors
CENPI	CENPI	1.54285	4.70704	123.091	9.00386e-12	1.12311e-09	clusterTuberal progenitors_vs_others	Tuberal progenitors
CHAF1A	CHAF1A	1.03054	5.25951	122.665	9.25257e-12	1.13529e-09	clusterTuberal progenitors_vs_others	Tuberal progenitors
PRIM2	PRIM2	0.772234	6.72308	122.648	9.26699e-12	1.13529e-09	clusterTuberal progenitors_vs_others	Tuberal progenitors
DHFR	DHFR	0.905473	6.37561	122.318	9.55897e-12	1.1607e-09	clusterTuberal progenitors_vs_others	Tuberal progenitors
LIX11	LIX1	1.1513	7.21902	179.841	1.10539e-11	1.33044e-09	clusterTuberal progenitors_vs_others	Tuberal progenitors
STXBP6	STXBP6	1.13834	5.29182	120.134	1.1757e-11	1.40277e-09	clusterTuberal progenitors_vs_others	Tuberal progenitors
IQGAP3	IQGAP3	2.06595	3.81796	119.387	1.26284e-11	1.49375e-09	clusterTuberal progenitors_vs_others	Tuberal progenitors
DTL1	DTL	1.17114	5.37339	118.743	1.38795e-11	1.6139e-09	clusterTuberal progenitors_vs_others	Tuberal progenitors
RPA3	RPA3	0.728295	6.78329	118.141	1.42401e-11	1.64192e-09	clusterTuberal progenitors_vs_others	Tuberal progenitors
PIF1	PIF1	2.96904	3.6492	118.285	1.46537e-11	1.67553e-09	clusterTuberal progenitors_vs_others	Tuberal progenitors
SGO1	SGO1	1.70211	5.45008	157.721	1.562e-11	1.77126e-09	clusterTuberal progenitors_vs_others	Tuberal progenitors
SDK1	SDK1	0.634236	9.03711	113.51	2.24577e-11	2.50522e-09	clusterTuberal progenitors_vs_others	Tuberal progenitors
SOX9-AS1	SOX9-AS1	1.36293	4.89686	118.805	2.30992e-11	2.53726e-09	clusterTuberal progenitors_vs_others	Tuberal progenitors
AC007529.2	AC007529.2	1.37965	4.67918	113.222	2.31148e-11	2.53726e-09	clusterTuberal progenitors_vs_others	Tuberal progenitors
NUDT1	NUDT1	0.842424	6.14766	113.014	2.3602e-11	2.57018e-09	clusterTuberal progenitors_vs_others	Tuberal progenitors
SPAG5	SPAG5	1.52839	4.21137	111.85	2.65394e-11	2.8673e-09	clusterTuberal progenitors_vs_others	Tuberal progenitors
BMS1P14	BMS1P14	1.11198	5.00802	111.717	2.69005e-11	2.88361e-09	clusterTuberal progenitors_vs_others	Tuberal progenitors
BCL11B	BCL11B	0.76744	6.53439	111.523	2.74329e-11	2.91788e-09	clusterTuberal progenitors_vs_others	Tuberal progenitors
CIP2A	CIP2A	1.30472	5.24705	120.799	2.90828e-11	3.06958e-09	clusterTuberal progenitors_vs_others	Tuberal progenitors
HMGN2	HMGN2	0.756811	10.2004	117.414	2.97447e-11	3.11547e-09	clusterTuberal progenitors_vs_others	Tuberal progenitors
SLC15A3	SLC15A3	1.41242	4.31082	110.508	3.04206e-11	3.16212e-09	clusterTuberal progenitors_vs_others	Tuberal progenitors
XRCC2	XRCC2	1.37165	4.77963	110.287	3.11168e-11	3.21018e-09	clusterTuberal progenitors_vs_others	Tuberal progenitors
ECT2	ECT2	1.70242	5.85866	193.881	3.26903e-11	3.34734e-09	clusterTuberal progenitors_vs_others	Tuberal progenitors
HELLS	HELLS	0.886765	7.11682	125.622	3.37765e-11	3.43294e-09	clusterTuberal progenitors_vs_others	Tuberal progenitors
HIST1H1A	HIST1H1A	1.42976	4.81609	109.385	3.41362e-11	3.44399e-09	clusterTuberal progenitors_vs_others	Tuberal progenitors
DSCC1	DSCC1	1.38102	4.37144	108.616	3.69576e-11	3.70143e-09	clusterTuberal progenitors_vs_others	Tuberal progenitors
LRRCC1	LRRCC1	0.932382	5.49705	108.534	3.72731e-11	3.70598e-09	clusterTuberal progenitors_vs_others	Tuberal progenitors
FZD8	FZD8	1.13731	5.01667	107.435	4.17919e-11	4.06685e-09	clusterTuberal progenitors_vs_others	Tuberal progenitors
NOSTRIN	NOSTRIN	1.67907	4.31909	107.212	4.27785e-11	4.13355e-09	clusterTuberal progenitors_vs_others	Tuberal progenitors
KIF24	KIF24	1.42724	4.09826	106.876	4.43104e-11	4.23742e-09	clusterTuberal progenitors_vs_others	Tuberal progenitors
ITGA2	ITGA2	0.979218	5.69634	107.162	4.7049e-11	4.45213e-09	clusterTuberal progenitors_vs_others	Tuberal progenitors
HEY1	HEY1	1.03829	5.96469	115.892	5.00543e-11	4.70407e-09	clusterTuberal progenitors_vs_others	Tuberal progenitors
FANCB	FANCB	1.19974	4.85765	105.295	5.23588e-11	4.88718e-09	clusterTuberal progenitors_vs_others	Tuberal progenitors
SHB	SHB	0.990966	5.51801	104.921	5.44856e-11	5.03492e-09	clusterTuberal progenitors_vs_others	Tuberal progenitors
HMGN5	HMGN5	0.820826	5.96854	104.888	5.46755e-11	5.03492e-09	clusterTuberal progenitors_vs_others	Tuberal progenitors
RRM1	RRM1	0.811654	6.26038	104.682	5.58928e-11	5.1127e-09	clusterTuberal progenitors_vs_others	Tuberal progenitors
CDCA5	CDCA5	1.36798	4.64715	104.003	6.0101e-11	5.46123e-09	clusterTuberal progenitors_vs_others	Tuberal progenitors
PRIM1	PRIM1	1.03658	5.23818	103.549	6.31097e-11	5.6969e-09	clusterTuberal progenitors_vs_others	Tuberal progenitors
GGH	GGH	0.820593	5.80258	103.1	6.62402e-11	5.84281e-09	clusterTuberal progenitors_vs_others	Tuberal progenitors
DEK	DEK	0.670028	8.60924	103.073	6.64295e-11	5.84281e-09	clusterTuberal progenitors_vs_others	Tuberal progenitors
NCAPG2	NCAPG2	1.10751	5.09543	102.615	6.98083e-11	6.06227e-09	clusterTuberal progenitors_vs_others	Tuberal progenitors
FAM111A	FAM111A	1.08135	5.25262	102.236	7.27433e-11	6.27743e-09	clusterTuberal progenitors_vs_others	Tuberal progenitors
CCDC18	CCDC18	0.904103	5.75138	101.77	7.65287e-11	6.56282e-09	clusterTuberal progenitors_vs_others	Tuberal progenitors
SKA1	SKA1	1.74154	4.10795	101.79	7.93098e-11	6.75907e-09	clusterTuberal progenitors_vs_others	Tuberal progenitors
NOTCH21	NOTCH2	0.644031	6.6636	100.793	8.51768e-11	7.17001e-09	clusterTuberal progenitors_vs_others	Tuberal progenitors
LINC01896	LINC01896	1.45114	4.80719	100.622	8.67946e-11	7.26164e-09	clusterTuberal progenitors_vs_others	Tuberal progenitors
BLM	BLM	1.11503	5.13668	100.229	9.06333e-11	7.53684e-09	clusterTuberal progenitors_vs_others	Tuberal progenitors
STK39	STK39	0.673552	7.52177	100.112	9.18214e-11	7.58965e-09	clusterTuberal progenitors_vs_others	Tuberal progenitors
DTYMK	DTYMK	0.822215	6.60406	101.233	9.27873e-11	7.62356e-09	clusterTuberal progenitors_vs_others	Tuberal progenitors
DNA2	DNA2	1.14548	5.23513	98.5944	1.08701e-10	8.77345e-09	clusterTuberal progenitors_vs_others	Tuberal progenitors
INCENP	INCENP	1.65996	4.80573	112.616	1.10905e-10	8.89898e-09	clusterTuberal progenitors_vs_others	Tuberal progenitors
HCN1	HCN1	2.21586	6.31331	244.075	1.19385e-10	9.52372e-09	clusterTuberal progenitors_vs_others	Tuberal progenitors
CENPU	CENPU	1.21869	5.98176	135.243	1.31663e-10	1.04425e-08	clusterTuberal progenitors_vs_others	Tuberal progenitors
KIF20B	KIF20B	1.38528	6.21874	158.752	1.34602e-10	1.05934e-08	clusterTuberal progenitors_vs_others	Tuberal progenitors
TJP1	TJP1	0.598004	8.00956	95.9241	1.47029e-10	1.13977e-08	clusterTuberal progenitors_vs_others	Tuberal progenitors
DSN1	DSN1	1.113	4.9604	95.2411	1.59007e-10	1.21884e-08	clusterTuberal progenitors_vs_others	Tuberal progenitors
CDKN3	CDKN3	1.56886	5.46134	139.771	1.62732e-10	1.23362e-08	clusterTuberal progenitors_vs_others	Tuberal progenitors
SPDL1	SPDL1	1.02377	5.19776	94.9846	1.63773e-10	1.23468e-08	clusterTuberal progenitors_vs_others	Tuberal progenitors
CNKSR21	CNKSR2	0.718334	6.30375	94.683	1.6957e-10	1.27141e-08	clusterTuberal progenitors_vs_others	Tuberal progenitors
MARC1	MARC1	1.0354	5.30117	94.137	1.80635e-10	1.33973e-08	clusterTuberal progenitors_vs_others	Tuberal progenitors
TACC3	TACC3	1.6406	5.16552	133.466	1.87862e-10	1.38584e-08	clusterTuberal progenitors_vs_others	Tuberal progenitors
DOK61	DOK6	0.750649	8.7407	103.26	1.99223e-10	1.46179e-08	clusterTuberal progenitors_vs_others	Tuberal progenitors
CXCR4	CXCR4	0.824863	5.80516	93.1465	2.0273e-10	1.47961e-08	clusterTuberal progenitors_vs_others	Tuberal progenitors
HIST1H2AH	HIST1H2AH	2.0331	3.54552	92.2104	2.26293e-10	1.62563e-08	clusterTuberal progenitors_vs_others	Tuberal progenitors
E2F7	E2F7	1.67873	4.58299	107.923	2.39485e-10	1.71144e-08	clusterTuberal progenitors_vs_others	Tuberal progenitors
MELK	MELK	1.88642	5.2867	153.582	2.53339e-10	1.79179e-08	clusterTuberal progenitors_vs_others	Tuberal progenitors
AL355481.1	AL355481.1	1.30621	5.80485	132.979	2.64737e-10	1.85658e-08	clusterTuberal progenitors_vs_others	Tuberal progenitors
TYMSOS	TYMSOS	1.53917	4.20243	94.9763	2.65206e-10	1.85658e-08	clusterTuberal progenitors_vs_others	Tuberal progenitors
CNTLN1	CNTLN	0.667504	6.7433	90.3598	2.81957e-10	1.96383e-08	clusterTuberal progenitors_vs_others	Tuberal progenitors
FANCA	FANCA	1.02732	5.05136	90.2314	2.86329e-10	1.9842e-08	clusterTuberal progenitors_vs_others	Tuberal progenitors
BORA	BORA	1.74828	3.97368	89.8766	2.98793e-10	2.06017e-08	clusterTuberal progenitors_vs_others	Tuberal progenitors
MMS22L	MMS22L	0.923054	6.17181	101.94	3.0311e-10	2.07949e-08	clusterTuberal progenitors_vs_others	Tuberal progenitors
HS3ST4	HS3ST4	1.49206	4.15461	89.5928	3.0918e-10	2.10296e-08	clusterTuberal progenitors_vs_others	Tuberal progenitors
SPRED11	SPRED1	0.625596	6.8691	89.5451	3.10965e-10	2.10296e-08	clusterTuberal progenitors_vs_others	Tuberal progenitors
SHCBP1	SHCBP1	1.30309	4.3259	89.5407	3.11129e-10	2.10296e-08	clusterTuberal progenitors_vs_others	Tuberal progenitors
CHST11	CHST11	0.691333	7.11124	88.3578	3.59112e-10	2.39193e-08	clusterTuberal progenitors_vs_others	Tuberal progenitors
LIG1	LIG1	0.920525	5.35898	88.2816	3.62463e-10	2.39894e-08	clusterTuberal progenitors_vs_others	Tuberal progenitors
E2F8	E2F8	1.89193	3.69083	89.9396	3.63662e-10	2.39894e-08	clusterTuberal progenitors_vs_others	Tuberal progenitors
HIRIP3	HIRIP3	0.955152	5.21006	87.8712	3.81098e-10	2.50194e-08	clusterTuberal progenitors_vs_others	Tuberal progenitors
HMGA2-AS1	HMGA2-AS1	1.23385	5.23312	109.58	3.97339e-10	2.58899e-08	clusterTuberal progenitors_vs_others	Tuberal progenitors
SEMA5A1	SEMA5A	1.07487	7.92335	143.783	4.00174e-10	2.58999e-08	clusterTuberal progenitors_vs_others	Tuberal progenitors
CXXC4-AS1	CXXC4-AS1	0.746736	5.76031	86.8666	4.31191e-10	2.77764e-08	clusterTuberal progenitors_vs_others	Tuberal progenitors
STIL	STIL	1.52306	4.4302	93.4894	4.45539e-10	2.85665e-08	clusterTuberal progenitors_vs_others	Tuberal progenitors
MIS18A	MIS18A	0.791669	5.57431	85.9995	4.80113e-10	3.04983e-08	clusterTuberal progenitors_vs_others	Tuberal progenitors
RNASEH2A	RNASEH2A	0.823197	5.86387	85.4706	5.12844e-10	3.21312e-08	clusterTuberal progenitors_vs_others	Tuberal progenitors
TMSB15A	TMSB15A	0.584084	8.59671	85.4104	5.16725e-10	3.22272e-08	clusterTuberal progenitors_vs_others	Tuberal progenitors
VRK1	VRK1	0.803671	5.72552	84.4067	5.86167e-10	3.62288e-08	clusterTuberal progenitors_vs_others	Tuberal progenitors
AC092944.1	AC092944.1	0.951289	4.99377	83.7812	6.34462e-10	3.86909e-08	clusterTuberal progenitors_vs_others	Tuberal progenitors
LINC00461	LINC00461	1.58922	4.32311	98.7648	7.01662e-10	4.25996e-08	clusterTuberal progenitors_vs_others	Tuberal progenitors
NID1	NID1	1.00406	4.92361	82.7767	7.2115e-10	4.35197e-08	clusterTuberal progenitors_vs_others	Tuberal progenitors
FANCD2	FANCD2	1.37129	4.9071	98.4702	7.51321e-10	4.48212e-08	clusterTuberal progenitors_vs_others	Tuberal progenitors
BARD1	BARD1	0.805481	6.31512	84.8803	7.57046e-10	4.49672e-08	clusterTuberal progenitors_vs_others	Tuberal progenitors
SERPINI2	SERPINI2	1.38299	3.67645	81.7478	8.23254e-10	4.86891e-08	clusterTuberal progenitors_vs_others	Tuberal progenitors
LINC01833	LINC01833	0.687574	7.40981	85.9294	8.34116e-10	4.91198e-08	clusterTuberal progenitors_vs_others	Tuberal progenitors
LINC01224	LINC01224	1.05082	4.77583	80.8391	9.2636e-10	5.36312e-08	clusterTuberal progenitors_vs_others	Tuberal progenitors
RAD51AP1	RAD51AP1	1.45714	5.66259	130.5	1.07672e-09	6.18147e-08	clusterTuberal progenitors_vs_others	Tuberal progenitors
HMGB1	HMGB1	0.588728	10.4376	79.4636	1.10962e-09	6.34381e-08	clusterTuberal progenitors_vs_others	Tuberal progenitors
USP44	USP44	1.11579	4.89671	80.433	1.13971e-09	6.46195e-08	clusterTuberal progenitors_vs_others	Tuberal progenitors
NMU	NMU	0.90649	5.56545	80.7001	1.27595e-09	7.17514e-08	clusterTuberal progenitors_vs_others	Tuberal progenitors
CHEK2	CHEK2	1.51438	4.06607	78.2358	1.30624e-09	7.31545e-08	clusterTuberal progenitors_vs_others	Tuberal progenitors
FAM182B	FAM182B	1.17537	4.26772	78.1623	1.31915e-09	7.35774e-08	clusterTuberal progenitors_vs_others	Tuberal progenitors
AC016769.5	AC016769.5	1.38515	3.98492	77.969	1.35371e-09	7.48963e-08	clusterTuberal progenitors_vs_others	Tuberal progenitors
SLC9A6	SLC9A6	0.852015	5.39582	77.329	1.47531e-09	8.09709e-08	clusterTuberal progenitors_vs_others	Tuberal progenitors
CCN1	CCN1	0.927246	6.90625	108.091	1.51904e-09	8.30389e-08	clusterTuberal progenitors_vs_others	Tuberal progenitors
KC877982.1	KC877982.1	1.8703	6.46174	204.106	1.54887e-09	8.40004e-08	clusterTuberal progenitors_vs_others	Tuberal progenitors
LRP4	LRP4	1.09085	4.50499	76.9023	1.56285e-09	8.44249e-08	clusterTuberal progenitors_vs_others	Tuberal progenitors
SASS6	SASS6	0.827407	5.15495	76.774	1.59025e-09	8.55678e-08	clusterTuberal progenitors_vs_others	Tuberal progenitors
LINC00513	LINC00513	0.730899	6.44605	76.6744	1.61186e-09	8.60557e-08	clusterTuberal progenitors_vs_others	Tuberal progenitors
CENPK	CENPK	1.23159	6.81993	142.374	1.6403e-09	8.70028e-08	clusterTuberal progenitors_vs_others	Tuberal progenitors
MIR3659HG	MIR3659HG	1.33939	4.05081	76.4024	1.67254e-09	8.82651e-08	clusterTuberal progenitors_vs_others	Tuberal progenitors
ZNF519	ZNF519	0.705449	5.71615	75.4379	1.9082e-09	9.97534e-08	clusterTuberal progenitors_vs_others	Tuberal progenitors
CENPQ	CENPQ	1.19107	4.42426	75.4192	1.9131e-09	9.97534e-08	clusterTuberal progenitors_vs_others	Tuberal progenitors
SKA3	SKA3	1.72192	4.20653	90.8353	1.91931e-09	9.97534e-08	clusterTuberal progenitors_vs_others	Tuberal progenitors
RBL1	RBL1	0.746554	5.76774	75.1481	1.98578e-09	1.02818e-07	clusterTuberal progenitors_vs_others	Tuberal progenitors
FAT31	FAT3	0.858745	9.06415	110	2.04619e-09	1.05548e-07	clusterTuberal progenitors_vs_others	Tuberal progenitors
SFRP11	SFRP1	1.08206	8.25079	137.254	2.07955e-09	1.06867e-07	clusterTuberal progenitors_vs_others	Tuberal progenitors
GINS1	GINS1	1.08195	5.36096	86.7084	2.09339e-09	1.07059e-07	clusterTuberal progenitors_vs_others	Tuberal progenitors
FP325318.1	FP325318.1	1.02699	4.27119	74.7294	2.10386e-09	1.07059e-07	clusterTuberal progenitors_vs_others	Tuberal progenitors
KNTC1	KNTC1	0.791671	5.29066	74.7197	2.10669e-09	1.07059e-07	clusterTuberal progenitors_vs_others	Tuberal progenitors
AP001347.1	AP001347.1	0.656009	6.34839	74.1723	2.27283e-09	1.14837e-07	clusterTuberal progenitors_vs_others	Tuberal progenitors
GEN1	GEN1	0.843278	5.17936	74.1392	2.2833e-09	1.14837e-07	clusterTuberal progenitors_vs_others	Tuberal progenitors
ANKRD1	ANKRD1	8.78755	4.48172	2825.77	9.73842e-30	1.33621e-25	clusterUnassigned_vs_others	Unassigned
S100A11	S100A11	3.47254	7.95663	2534.05	4.43053e-29	3.03956e-25	clusterUnassigned_vs_others	Unassigned
KRT8	KRT8	3.24983	7.09265	2183.01	3.51272e-28	1.6066e-24	clusterUnassigned_vs_others	Unassigned
S100A10	S100A10	2.76785	7.20164	1576.97	3.16646e-26	1.08618e-22	clusterUnassigned_vs_others	Unassigned
ACTC1	ACTC1	5.07016	4.75828	1543.32	4.66152e-26	1.27922e-22	clusterUnassigned_vs_others	Unassigned
ANXA2	ANXA2	2.50616	8.4093	1500.3	6.29961e-26	1.44062e-22	clusterUnassigned_vs_others	Unassigned
CAVIN1	CAVIN1	6.15431	3.59872	1364.1	2.33896e-25	4.5847e-22	clusterUnassigned_vs_others	Unassigned
CALD1	CALD1	2.67792	9.62723	1474.12	2.03962e-24	3.4982e-21	clusterUnassigned_vs_others	Unassigned
SPARC	SPARC	2.08489	9.16625	960.131	2.89292e-23	4.41041e-20	clusterUnassigned_vs_others	Unassigned
ACTN1	ACTN1	3.19394	5.85422	912.888	6.29723e-23	8.64043e-20	clusterUnassigned_vs_others	Unassigned
TPM2	TPM2	3.26446	8.52755	1705.94	1.00043e-22	1.24791e-19	clusterUnassigned_vs_others	Unassigned
APOE	APOE	3.23286	5.05386	835.691	1.91932e-22	2.19458e-19	clusterUnassigned_vs_others	Unassigned
COL5A2	COL5A2	2.29554	7.12188	818.818	2.53289e-22	2.67337e-19	clusterUnassigned_vs_others	Unassigned
COL5A1	COL5A1	4.73465	3.60925	792.109	3.97478e-22	3.89557e-19	clusterUnassigned_vs_others	Unassigned
KRT18	KRT18	5.00457	6.87577	2304.71	1.66062e-21	1.51902e-18	clusterUnassigned_vs_others	Unassigned
FN1	FN1	2.16243	6.46953	656.388	5.0599e-21	4.33918e-18	clusterUnassigned_vs_others	Unassigned
ITGAV	ITGAV	2.17227	6.76692	641.634	6.87473e-21	5.54871e-18	clusterUnassigned_vs_others	Unassigned
HBEGF	HBEGF	3.80271	3.69491	623.812	1.00466e-20	7.65831e-18	clusterUnassigned_vs_others	Unassigned
DSTN	DSTN	1.76999	8.46882	603.927	1.55334e-20	1.12176e-17	clusterUnassigned_vs_others	Unassigned
COL8A1	COL8A1	6.01855	8.45964	3389.74	2.30803e-20	1.58342e-17	clusterUnassigned_vs_others	Unassigned
RHOC	RHOC	2.05518	6.88464	571.13	3.28724e-20	2.14782e-17	clusterUnassigned_vs_others	Unassigned
MYH9	MYH9	1.99079	6.75005	543.687	6.35723e-20	3.96489e-17	clusterUnassigned_vs_others	Unassigned
TAGLN	TAGLN	6.08361	9.07927	3583.86	7.73705e-20	4.61565e-17	clusterUnassigned_vs_others	Unassigned
CSRP1	CSRP1	3.21105	4.8682	531.644	8.5772e-20	4.90366e-17	clusterUnassigned_vs_others	Unassigned
PDLIM1	PDLIM1	3.62359	4.35622	543.784	9.24945e-20	5.07647e-17	clusterUnassigned_vs_others	Unassigned
TPM4	TPM4	1.53592	8.15142	512.089	1.41463e-19	7.46542e-17	clusterUnassigned_vs_others	Unassigned
CALR	CALR	1.47875	9.01461	474.218	3.93425e-19	1.92792e-16	clusterUnassigned_vs_others	Unassigned
ARSJ	ARSJ	6.56254	1.82174	464.64	5.15862e-19	2.44074e-16	clusterUnassigned_vs_others	Unassigned
OLFML2A	OLFML2A	5.12346	2.80954	449.295	8.05204e-19	3.68274e-16	clusterUnassigned_vs_others	Unassigned
LOXL2	LOXL2	3.66574	3.53955	438.872	1.09862e-18	4.86265e-16	clusterUnassigned_vs_others	Unassigned
COL4A2	COL4A2	2.42469	6.77641	630.531	1.19424e-18	5.12069e-16	clusterUnassigned_vs_others	Unassigned
HSPB11	HSPB1	1.40244	7.91388	411.274	2.5898e-18	1.04514e-15	clusterUnassigned_vs_others	Unassigned
CRYAB	CRYAB	8.32906	3.15065	857.212	2.6671e-18	1.04558e-15	clusterUnassigned_vs_others	Unassigned
PALLD	PALLD	1.55632	9.09467	450.501	3.2943e-18	1.25559e-15	clusterUnassigned_vs_others	Unassigned
CDKN1A	CDKN1A	2.96809	4.25108	395.849	4.28319e-18	1.58837e-15	clusterUnassigned_vs_others	Unassigned
MYL6	MYL6	1.1669	10.4879	394.825	4.43153e-18	1.60013e-15	clusterUnassigned_vs_others	Unassigned
GLIPR1	GLIPR1	2.5842	4.63451	390.9	5.05309e-18	1.77778e-15	clusterUnassigned_vs_others	Unassigned
MYL12A	MYL12A	1.62215	7.59423	395.315	5.33513e-18	1.83008e-15	clusterUnassigned_vs_others	Unassigned
FBN1	FBN1	2.4132	5.24006	386.164	5.93009e-18	1.98455e-15	clusterUnassigned_vs_others	Unassigned
P4HB	P4HB	1.46096	7.24723	383.275	6.54422e-18	2.13793e-15	clusterUnassigned_vs_others	Unassigned
TGFB21	TGFB2	3.74142	5.25657	655.214	6.8191e-18	2.17593e-15	clusterUnassigned_vs_others	Unassigned
PHLDA1	PHLDA1	2.62785	5.14292	372.409	9.54022e-18	2.97503e-15	clusterUnassigned_vs_others	Unassigned
VCAN	VCAN	1.46253	8.20155	371.489	9.92421e-18	3.026e-15	clusterUnassigned_vs_others	Unassigned
SERPINH1	SERPINH1	1.60799	6.84224	332.413	4.19782e-17	1.25214e-14	clusterUnassigned_vs_others	Unassigned
ANXA1	ANXA1	2.66873	6.87072	682.762	5.55487e-17	1.62167e-14	clusterUnassigned_vs_others	Unassigned
FAM114A1	FAM114A1	2.64335	4.37844	314.88	8.47251e-17	2.4219e-14	clusterUnassigned_vs_others	Unassigned
SC5D	SC5D	1.96885	5.56305	309.835	1.04396e-16	2.9233e-14	clusterUnassigned_vs_others	Unassigned
CNN2	CNN2	1.51634	6.40266	303.326	1.37301e-16	3.65523e-14	clusterUnassigned_vs_others	Unassigned
CAPG	CAPG	2.55828	4.3514	303.117	1.38526e-16	3.65523e-14	clusterUnassigned_vs_others	Unassigned
PPIB	PPIB	1.04496	8.72406	301.947	1.4561e-16	3.74258e-14	clusterUnassigned_vs_others	Unassigned
PELO	PELO	2.47469	4.38123	301.678	1.47292e-16	3.74258e-14	clusterUnassigned_vs_others	Unassigned
RRAS	RRAS	3.01656	3.89988	299.049	1.64874e-16	4.11316e-14	clusterUnassigned_vs_others	Unassigned
RAB13	RAB13	1.25941	7.07455	298.012	1.72417e-16	4.22453e-14	clusterUnassigned_vs_others	Unassigned
CD99	CD99	1.2203	8.30391	293.802	2.07058e-16	4.98429e-14	clusterUnassigned_vs_others	Unassigned
C5orf46	C5orf46	8.36545	1.13755	331.754	2.34111e-16	5.53834e-14	clusterUnassigned_vs_others	Unassigned
CYTOR	CYTOR	2.70976	5.268	390.646	2.826e-16	6.57212e-14	clusterUnassigned_vs_others	Unassigned
ITGB1	ITGB1	1.04647	8.76704	284.5	3.12984e-16	7.15743e-14	clusterUnassigned_vs_others	Unassigned
TES	TES	2.36698	4.65774	282.539	3.42008e-16	7.69294e-14	clusterUnassigned_vs_others	Unassigned
PFN1	PFN1	1.31229	9.21378	308.507	4.03903e-16	8.93864e-14	clusterUnassigned_vs_others	Unassigned
IGFBP3	IGFBP3	3.59448	3.99828	343.194	4.45105e-16	9.6941e-14	clusterUnassigned_vs_others	Unassigned
MYOF	MYOF	2.70882	4.51653	312.528	5.12537e-16	1.09883e-13	clusterUnassigned_vs_others	Unassigned
HSP90B1	HSP90B1	1.03008	9.66045	267.278	6.95607e-16	1.44613e-13	clusterUnassigned_vs_others	Unassigned
TNFRSF12A	TNFRSF12A	4.38936	3.26173	412.723	8.25322e-16	1.69019e-13	clusterUnassigned_vs_others	Unassigned
TGFB1I1	TGFB1I1	3.53904	3.34234	260.555	9.62314e-16	1.94175e-13	clusterUnassigned_vs_others	Unassigned
NEXN	NEXN	1.62743	5.76609	257.084	1.14124e-15	2.26941e-13	clusterUnassigned_vs_others	Unassigned
PDIA4	PDIA4	1.32125	6.78785	256.231	1.19044e-15	2.33342e-13	clusterUnassigned_vs_others	Unassigned
MMP2	MMP2	2.12406	4.73356	255.087	1.26007e-15	2.43513e-13	clusterUnassigned_vs_others	Unassigned
COL11A1	COL11A1	1.42393	7.30828	266.817	1.49135e-15	2.84205e-13	clusterUnassigned_vs_others	Unassigned
VCL	VCL	1.31898	7.17324	251.109	1.53821e-15	2.8912e-13	clusterUnassigned_vs_others	Unassigned
INPP4B	INPP4B	1.86861	5.50068	250.652	1.57412e-15	2.91872e-13	clusterUnassigned_vs_others	Unassigned
INHBA	INHBA	5.65857	1.40314	248.657	1.74184e-15	3.18664e-13	clusterUnassigned_vs_others	Unassigned
BAX	BAX	1.29054	6.6772	245.186	2.08109e-15	3.7084e-13	clusterUnassigned_vs_others	Unassigned
TPM1	TPM1	3.3551	9.82652	1271.87	2.55438e-15	4.49342e-13	clusterUnassigned_vs_others	Unassigned
ANXA5	ANXA5	1.35568	7.15022	234.721	3.68027e-15	6.39203e-13	clusterUnassigned_vs_others	Unassigned
ACTB	ACTB	1.08214	11.5785	251.944	3.75361e-15	6.41846e-13	clusterUnassigned_vs_others	Unassigned
RBM20	RBM20	4.12113	2.23889	233.815	3.78905e-15	6.41846e-13	clusterUnassigned_vs_others	Unassigned
FTL	FTL	0.892269	10.9983	230.012	4.65708e-15	7.69346e-13	clusterUnassigned_vs_others	Unassigned
KDELR2	KDELR2	1.24243	7.13207	229.806	4.70994e-15	7.69346e-13	clusterUnassigned_vs_others	Unassigned
MSRB3	MSRB3	2.06186	5.30183	227.5	5.34602e-15	8.62858e-13	clusterUnassigned_vs_others	Unassigned
CAV1	CAV1	4.78086	2.12612	227.29	5.40819e-15	8.62858e-13	clusterUnassigned_vs_others	Unassigned
TMEM88	TMEM88	2.16405	4.63645	227.071	5.47395e-15	8.63311e-13	clusterUnassigned_vs_others	Unassigned
CDKN2B	CDKN2B	5.69876	1.49167	226.682	5.59302e-15	8.69719e-13	clusterUnassigned_vs_others	Unassigned
PDLIM2	PDLIM2	1.98959	5.1732	226.527	5.64135e-15	8.69719e-13	clusterUnassigned_vs_others	Unassigned
ADAM9	ADAM9	1.64803	5.49472	225.973	5.81719e-15	8.86863e-13	clusterUnassigned_vs_others	Unassigned
HEY11	HEY1	2.06455	5.96469	258.066	6.19404e-15	9.33939e-13	clusterUnassigned_vs_others	Unassigned
HCFC1R1	HCFC1R1	1.67314	5.5348	223.416	6.70949e-15	1.00066e-12	clusterUnassigned_vs_others	Unassigned
PHPT1	PHPT1	0.979829	8.97218	219.809	8.22555e-15	1.21358e-12	clusterUnassigned_vs_others	Unassigned
IGFBP2	IGFBP2	0.903979	9.75369	218.358	8.93537e-15	1.30428e-12	clusterUnassigned_vs_others	Unassigned
PDIA3	PDIA3	0.965479	8.81055	214.87	1.09256e-14	1.56157e-12	clusterUnassigned_vs_others	Unassigned
MYL9	MYL9	4.94028	6.73697	1303.46	1.1303e-14	1.59885e-12	clusterUnassigned_vs_others	Unassigned
ACTG1	ACTG1	0.923372	11.3435	213.706	1.16913e-14	1.6369e-12	clusterUnassigned_vs_others	Unassigned
FLNB	FLNB	1.95639	4.89046	213.291	1.19779e-14	1.66009e-12	clusterUnassigned_vs_others	Unassigned
AC083870.1	AC083870.1	1.50479	6.2876	212.863	1.22819e-14	1.68519e-12	clusterUnassigned_vs_others	Unassigned
PFKP	PFKP	2.90733	4.19058	260.949	1.25445e-14	1.70419e-12	clusterUnassigned_vs_others	Unassigned
ITPR1	ITPR1	2.05335	4.80993	210.575	1.4051e-14	1.89014e-12	clusterUnassigned_vs_others	Unassigned
HSPA5	HSPA5	1.00436	8.24135	207.8	1.65718e-14	2.20758e-12	clusterUnassigned_vs_others	Unassigned
AL353138.1	AL353138.1	3.68011	2.30886	206.784	1.76127e-14	2.32369e-12	clusterUnassigned_vs_others	Unassigned
MYL12B	MYL12B	1.03893	8.38116	205.842	1.86396e-14	2.43576e-12	clusterUnassigned_vs_others	Unassigned
COL12A1	COL12A1	5.18362	1.40798	205.053	1.95496e-14	2.53057e-12	clusterUnassigned_vs_others	Unassigned
SHC1	SHC1	2.06537	4.79255	202.948	2.22183e-14	2.82276e-12	clusterUnassigned_vs_others	Unassigned
CNN1	CNN1	4.25742	2.57841	199.332	2.77573e-14	3.46235e-12	clusterUnassigned_vs_others	Unassigned
F2R	F2R	1.63738	5.50942	197.546	3.10242e-14	3.83499e-12	clusterUnassigned_vs_others	Unassigned
TMED9	TMED9	1.00795	7.42654	196.785	3.25378e-14	3.98617e-12	clusterUnassigned_vs_others	Unassigned
EVA1B	EVA1B	2.41667	4.00338	196.015	3.41518e-14	4.14688e-12	clusterUnassigned_vs_others	Unassigned
LOX	LOX	3.62435	3.92705	261.649	3.83918e-14	4.62083e-12	clusterUnassigned_vs_others	Unassigned
PDLIM7	PDLIM7	1.51745	6.28973	199.081	4.04867e-14	4.83059e-12	clusterUnassigned_vs_others	Unassigned
HDLBP	HDLBP	1.01262	7.13681	189.634	5.13423e-14	6.07299e-12	clusterUnassigned_vs_others	Unassigned
TENM3-AS1	TENM3-AS1	2.65364	3.95947	184.838	7.03092e-14	8.08103e-12	clusterUnassigned_vs_others	Unassigned
PDIA6	PDIA6	0.885289	8.71033	184.76	7.06744e-14	8.08103e-12	clusterUnassigned_vs_others	Unassigned
PRRX1	PRRX1	5.32794	0.979661	181.514	8.77944e-14	9.91013e-12	clusterUnassigned_vs_others	Unassigned
MIR4435-2HG	MIR4435-2HG	2.9272	4.52754	274.199	8.81157e-14	9.91013e-12	clusterUnassigned_vs_others	Unassigned
SERF2	SERF2	0.782687	10.0449	180.169	9.61473e-14	1.07255e-11	clusterUnassigned_vs_others	Unassigned
GADD45A	GADD45A	2.12504	3.93417	175.092	1.36229e-13	1.49834e-11	clusterUnassigned_vs_others	Unassigned
SGIP1	SGIP1	2.17921	5.5169	179.741	1.38967e-13	1.51331e-11	clusterUnassigned_vs_others	Unassigned
CTSZ	CTSZ	1.5798	5.4387	174.638	1.40596e-13	1.51899e-11	clusterUnassigned_vs_others	Unassigned
NEDD41	NEDD4	1.42822	6.02846	174.315	1.43806e-13	1.54153e-11	clusterUnassigned_vs_others	Unassigned
CD59	CD59	1.17907	6.4394	171.863	1.70804e-13	1.81674e-11	clusterUnassigned_vs_others	Unassigned
PALM2-AKAP2	PALM2-AKAP2	1.62214	6.32254	174.183	1.91361e-13	2.01974e-11	clusterUnassigned_vs_others	Unassigned
EFEMP2	EFEMP2	1.69038	4.92891	168.435	2.18057e-13	2.26663e-11	clusterUnassigned_vs_others	Unassigned
ITGA11	ITGA11	5.88307	1.82022	238.689	2.25769e-13	2.32916e-11	clusterUnassigned_vs_others	Unassigned
PPP1R14B	PPP1R14B	1.1464	7.427	167.169	2.38897e-13	2.4462e-11	clusterUnassigned_vs_others	Unassigned
KCTD16	KCTD16	1.59004	5.89644	166.889	2.43782e-13	2.47773e-11	clusterUnassigned_vs_others	Unassigned
CAVIN3	CAVIN3	4.25858	1.93124	167.539	2.45871e-13	2.48059e-11	clusterUnassigned_vs_others	Unassigned
ITGA1	ITGA1	5.15519	4.79692	669.867	2.58232e-13	2.58628e-11	clusterUnassigned_vs_others	Unassigned
LAMP1	LAMP1	1.16974	6.45851	165.788	2.64087e-13	2.62575e-11	clusterUnassigned_vs_others	Unassigned
PLOD1	PLOD1	2.1638	4.25543	165.181	2.76035e-13	2.72481e-11	clusterUnassigned_vs_others	Unassigned
FSTL1	FSTL1	1.31608	7.51141	206.641	3.58974e-13	3.49325e-11	clusterUnassigned_vs_others	Unassigned
GREM1	GREM1	6.12687	1.60683	183.864	3.62016e-13	3.49804e-11	clusterUnassigned_vs_others	Unassigned
SSR3	SSR3	0.984687	7.27638	161.12	3.72612e-13	3.5695e-11	clusterUnassigned_vs_others	Unassigned
REXO2	REXO2	1.78445	5.1116	161.048	3.74614e-13	3.5695e-11	clusterUnassigned_vs_others	Unassigned
BMP4	BMP4	2.71925	3.80525	160.397	3.93302e-13	3.72172e-11	clusterUnassigned_vs_others	Unassigned
GUK1	GUK1	0.853901	8.13192	159.321	4.26432e-13	4.00758e-11	clusterUnassigned_vs_others	Unassigned
PLAT	PLAT	4.28989	1.99482	158.855	4.41682e-13	4.12267e-11	clusterUnassigned_vs_others	Unassigned
APLP2	APLP2	0.872171	8.23883	158.398	4.57239e-13	4.18252e-11	clusterUnassigned_vs_others	Unassigned
NME2	NME2	0.979471	9.13886	166.251	5.27369e-13	4.79208e-11	clusterUnassigned_vs_others	Unassigned
KRT19	KRT19	7.44461	1.64669	248.761	5.91559e-13	5.33999e-11	clusterUnassigned_vs_others	Unassigned
RBPMS	RBPMS	1.58578	6.23022	193.34	6.07098e-13	5.44444e-11	clusterUnassigned_vs_others	Unassigned
CAP1	CAP1	1.07742	6.94969	152.384	7.26592e-13	6.39075e-11	clusterUnassigned_vs_others	Unassigned
PROS1	PROS1	1.38824	6.03375	152.276	7.3278e-13	6.40412e-11	clusterUnassigned_vs_others	Unassigned
GNG11	GNG11	1.99009	4.84193	166.761	8.02062e-13	6.96525e-11	clusterUnassigned_vs_others	Unassigned
IGFBP7	IGFBP7	4.89466	5.62796	820.681	8.10058e-13	6.99044e-11	clusterUnassigned_vs_others	Unassigned
RAB32	RAB32	1.45048	5.16439	150.148	8.6656e-13	7.43129e-11	clusterUnassigned_vs_others	Unassigned
DDAH11	DDAH1	1.30938	6.84883	158.985	8.84439e-13	7.53751e-11	clusterUnassigned_vs_others	Unassigned
GLIPR2	GLIPR2	1.66691	5.28094	149.313	9.26027e-13	7.84322e-11	clusterUnassigned_vs_others	Unassigned
SELENOW	SELENOW	0.794475	8.90079	148.556	9.83729e-13	8.18345e-11	clusterUnassigned_vs_others	Unassigned
ITM2C1	ITM2C	1.04015	7.44552	148.909	9.8409e-13	8.18345e-11	clusterUnassigned_vs_others	Unassigned
YBX3	YBX3	1.20316	6.4494	146.74	1.13834e-12	9.40915e-11	clusterUnassigned_vs_others	Unassigned
TIMP1	TIMP1	1.00528	7.25773	146.043	1.20446e-12	9.83716e-11	clusterUnassigned_vs_others	Unassigned
TNNC1	TNNC1	3.44675	1.95764	145.913	1.21725e-12	9.88277e-11	clusterUnassigned_vs_others	Unassigned
TMSB10	TMSB10	0.714544	11.5815	145.561	1.25263e-12	1.01102e-10	clusterUnassigned_vs_others	Unassigned
PTN	PTN	1.91046	7.05649	277.41	1.32806e-12	1.06563e-10	clusterUnassigned_vs_others	Unassigned
FLNA	FLNA	1.19186	6.16755	144.238	1.39561e-12	1.11333e-10	clusterUnassigned_vs_others	Unassigned
LPP	LPP	1.04196	8.87443	169.999	1.41209e-12	1.11996e-10	clusterUnassigned_vs_others	Unassigned
EHD2	EHD2	4.08488	1.23383	143.632	1.46688e-12	1.15673e-10	clusterUnassigned_vs_others	Unassigned
ARPC5	ARPC5	0.883245	7.92288	143.201	1.5199e-12	1.18492e-10	clusterUnassigned_vs_others	Unassigned
LYPD1	LYPD1	2.76231	4.4198	196.103	1.54775e-12	1.19981e-10	clusterUnassigned_vs_others	Unassigned
GSN	GSN	1.69745	4.87885	141.289	1.78131e-12	1.37311e-10	clusterUnassigned_vs_others	Unassigned
COTL1	COTL1	1.03184	7.41244	139.561	2.08818e-12	1.59177e-10	clusterUnassigned_vs_others	Unassigned
MMP23B	MMP23B	3.93877	1.85375	139.605	2.15467e-12	1.63338e-10	clusterUnassigned_vs_others	Unassigned
OLFML2B	OLFML2B	5.11211	1.44129	147.521	2.24003e-12	1.68876e-10	clusterUnassigned_vs_others	Unassigned
ARID5B	ARID5B	1.08124	6.86178	137.539	2.44451e-12	1.82289e-10	clusterUnassigned_vs_others	Unassigned
CKAP4	CKAP4	0.865072	7.22877	137.352	2.48392e-12	1.83236e-10	clusterUnassigned_vs_others	Unassigned
SLN	SLN	10.0976	0.304472	188.285	2.72793e-12	2.0016e-10	clusterUnassigned_vs_others	Unassigned
GPX8	GPX8	1.15865	6.35117	135.814	2.83473e-12	2.06813e-10	clusterUnassigned_vs_others	Unassigned
CFL1	CFL1	0.721349	9.84603	135.757	2.84874e-12	2.06813e-10	clusterUnassigned_vs_others	Unassigned
TNS3	TNS3	1.64311	6.23308	182.517	3.3284e-12	2.39105e-10	clusterUnassigned_vs_others	Unassigned
FAT1	FAT1	0.909028	7.39695	133.816	3.37164e-12	2.40949e-10	clusterUnassigned_vs_others	Unassigned
SH3BGRL3	SH3BGRL3	0.752008	9.09368	133.408	3.49404e-12	2.47123e-10	clusterUnassigned_vs_others	Unassigned
CALU	CALU	1.45029	7.89342	229.499	3.75081e-12	2.62576e-10	clusterUnassigned_vs_others	Unassigned
CD63	CD63	0.752332	8.87378	132.498	3.78462e-12	2.63598e-10	clusterUnassigned_vs_others	Unassigned
CITED2	CITED2	2.04832	4.70217	156.025	3.84662e-12	2.66563e-10	clusterUnassigned_vs_others	Unassigned
NID11	NID1	1.82572	4.92361	131.814	4.02038e-12	2.77204e-10	clusterUnassigned_vs_others	Unassigned
FILIP1L	FILIP1L	1.23309	6.49135	134.383	4.04538e-12	2.77533e-10	clusterUnassigned_vs_others	Unassigned
FKBP10	FKBP10	1.15149	6.53025	131.147	4.26507e-12	2.89708e-10	clusterUnassigned_vs_others	Unassigned
APBB2	APBB2	1.25751	7.29765	160.556	4.51472e-12	3.03659e-10	clusterUnassigned_vs_others	Unassigned
CXXC5	CXXC5	1.8944	5.71955	191.793	4.87881e-12	3.26547e-10	clusterUnassigned_vs_others	Unassigned
THBS1	THBS1	2.01638	4.15163	128.31	5.50023e-12	3.63876e-10	clusterUnassigned_vs_others	Unassigned
MXRA7	MXRA7	1.02409	6.37958	128.278	5.51609e-12	3.63876e-10	clusterUnassigned_vs_others	Unassigned
CAST	CAST	1.09446	6.51116	128.22	5.54483e-12	3.64022e-10	clusterUnassigned_vs_others	Unassigned
SEPTIN11	SEPTIN11	0.780874	8.19752	128.011	5.65089e-12	3.69218e-10	clusterUnassigned_vs_others	Unassigned
P4HA2	P4HA2	2.32482	3.37873	126.46	6.5082e-12	4.21221e-10	clusterUnassigned_vs_others	Unassigned
SELENOM	SELENOM	1.54801	5.01858	126.14	6.7021e-12	4.31735e-10	clusterUnassigned_vs_others	Unassigned
MXRA8	MXRA8	2.65892	2.50113	125.235	7.28383e-12	4.62902e-10	clusterUnassigned_vs_others	Unassigned
GASK1B1	GASK1B	3.0432	2.80955	125.23	7.28714e-12	4.62902e-10	clusterUnassigned_vs_others	Unassigned
TLN1	TLN1	0.932464	6.91882	123.999	8.16762e-12	5.16442e-10	clusterUnassigned_vs_others	Unassigned
LOXL1-AS1	LOXL1-AS1	2.49649	3.437	123.897	8.2456e-12	5.18981e-10	clusterUnassigned_vs_others	Unassigned
S100A16	S100A16	6.67927	0.726701	134.331	8.61435e-12	5.39714e-10	clusterUnassigned_vs_others	Unassigned
PRSS23	PRSS23	2.86301	6.40538	444.544	8.81045e-12	5.49492e-10	clusterUnassigned_vs_others	Unassigned
DDOST	DDOST	0.839994	7.20908	122.228	9.64038e-12	5.98532e-10	clusterUnassigned_vs_others	Unassigned
ELK3	ELK3	1.34683	5.20272	121.423	1.04014e-11	6.39987e-10	clusterUnassigned_vs_others	Unassigned
ZYX	ZYX	1.679	4.68925	121.256	1.05673e-11	6.4548e-10	clusterUnassigned_vs_others	Unassigned
MDM2	MDM2	1.15482	6.31825	121.238	1.05847e-11	6.4548e-10	clusterUnassigned_vs_others	Unassigned
RBM3	RBM3	0.813192	7.7194	120.642	1.12012e-11	6.80053e-10	clusterUnassigned_vs_others	Unassigned
ACTN4	ACTN4	0.9921	6.81866	120.501	1.13531e-11	6.86237e-10	clusterUnassigned_vs_others	Unassigned
AP2M1	AP2M1	0.836973	7.4815	119.654	1.23092e-11	7.3753e-10	clusterUnassigned_vs_others	Unassigned
S100A6	S100A6	1.21249	7.43542	158.492	1.36346e-11	8.13393e-10	clusterUnassigned_vs_others	Unassigned
ARHGAP10	ARHGAP10	1.58749	5.15827	118.257	1.40807e-11	8.32766e-10	clusterUnassigned_vs_others	Unassigned
OPTN	OPTN	1.53057	5.38949	115.744	1.79938e-11	1.04616e-09	clusterUnassigned_vs_others	Unassigned
MFGE8	MFGE8	2.81344	5.77931	345.513	1.8191e-11	1.05316e-09	clusterUnassigned_vs_others	Unassigned
PHLDA3	PHLDA3	2.38647	3.38198	115.527	1.83818e-11	1.05974e-09	clusterUnassigned_vs_others	Unassigned

## Sheet: d25_celltype_DEG
	gene	logFC	logCPM	F	PValue	FDR	comparison	cluster
DLL3	DLL3	3.38097	4.68644	595.82	7.13163e-24	9.04251e-20	clusterARC precursors_vs_others	ARC precursors
ZC3H12C	ZC3H12C	2.32618	7.82571	594.087	1.20953e-23	9.04251e-20	clusterARC precursors_vs_others	ARC precursors
AC125613.1	AC125613.1	2.26016	10.0238	569.477	1.5284e-23	9.04251e-20	clusterARC precursors_vs_others	ARC precursors
AC068308.1	AC068308.1	2.37809	9.09627	557.039	1.84261e-22	6.84745e-19	clusterARC precursors_vs_others	ARC precursors
GADD45G	GADD45G	3.21698	4.19439	489.522	1.92897e-22	6.84745e-19	clusterARC precursors_vs_others	ARC precursors
SOX4	SOX4	1.6708	7.46988	458.925	5.64711e-22	1.67051e-18	clusterARC precursors_vs_others	ARC precursors
SOX2-OT	SOX2-OT	2.36126	10.721	528.726	8.67577e-22	2.1998e-18	clusterARC precursors_vs_others	ARC precursors
PRDM12	PRDM12	4.20067	4.16494	427.29	9.98693e-21	2.21573e-17	clusterARC precursors_vs_others	ARC precursors
RDX	RDX	1.76768	9.20446	373.198	1.70427e-20	3.36102e-17	clusterARC precursors_vs_others	ARC precursors
NNAT	NNAT	1.81196	8.93109	352.215	4.37741e-20	7.76947e-17	clusterARC precursors_vs_others	ARC precursors
LINC01896	LINC01896	3.3904	4.76334	345.612	5.95313e-20	9.60564e-17	clusterARC precursors_vs_others	ARC precursors
TOX3	TOX3	2.26587	7.18771	439.867	1.21042e-19	1.79031e-16	clusterARC precursors_vs_others	ARC precursors
HES6	HES6	2.6929	5.2744	331.247	2.53603e-19	3.2952e-16	clusterARC precursors_vs_others	ARC precursors
Z99774.1	Z99774.1	2.02642	6.02677	315.491	2.59918e-19	3.2952e-16	clusterARC precursors_vs_others	ARC precursors
FGD3	FGD3	2.16679	5.47619	310.348	3.38535e-19	4.00577e-16	clusterARC precursors_vs_others	ARC precursors
NIN	NIN	1.69966	6.90658	304.859	4.50817e-19	5.00097e-16	clusterARC precursors_vs_others	ARC precursors
CRYBG3	CRYBG3	2.54471	5.87993	387.255	1.10339e-18	1.15201e-15	clusterARC precursors_vs_others	ARC precursors
NBAT1	NBAT1	1.57556	7.5328	281.403	1.61927e-18	1.59669e-15	clusterARC precursors_vs_others	ARC precursors
AC002069.2	AC002069.2	2.355	4.82269	274.251	2.43697e-18	2.27652e-15	clusterARC precursors_vs_others	ARC precursors
FLI1	FLI1	4.81472	3.57642	323.74	3.3644e-18	2.98574e-15	clusterARC precursors_vs_others	ARC precursors
CLCN5	CLCN5	1.94155	7.02594	317.921	3.57811e-18	3.02419e-15	clusterARC precursors_vs_others	ARC precursors
GDAP1	GDAP1	1.43013	7.91658	263.291	4.6459e-18	3.74819e-15	clusterARC precursors_vs_others	ARC precursors
MIAT	MIAT	2.10455	8.15989	352.794	7.8863e-18	6.08582e-15	clusterARC precursors_vs_others	ARC precursors
SFTA3	SFTA3	1.57923	6.80152	251.749	9.40874e-18	6.95815e-15	clusterARC precursors_vs_others	ARC precursors
SOX3	SOX3	2.87542	4.02697	249.644	1.07339e-17	7.62062e-15	clusterARC precursors_vs_others	ARC precursors
IGFBP3	IGFBP3	4.21962	4.05752	270.314	1.26764e-17	8.65357e-15	clusterARC precursors_vs_others	ARC precursors
PTPRN2	PTPRN2	1.28766	9.20381	239.982	1.99051e-17	1.3085e-14	clusterARC precursors_vs_others	ARC precursors
SRRM4	SRRM4	1.88635	7.86782	269.506	2.24616e-17	1.42112e-14	clusterARC precursors_vs_others	ARC precursors
AC110491.2	AC110491.2	3.03818	3.5864	237.625	2.32195e-17	1.42112e-14	clusterARC precursors_vs_others	ARC precursors
FEZF2	FEZF2	3.62144	3.81716	235.371	2.69348e-17	1.59355e-14	clusterARC precursors_vs_others	ARC precursors
PRMT8	PRMT8	2.67847	4.37626	233.526	3.04451e-17	1.74313e-14	clusterARC precursors_vs_others	ARC precursors
ABCA5	ABCA5	1.49895	6.95181	232.816	3.19202e-17	1.77047e-14	clusterARC precursors_vs_others	ARC precursors
NKX2-1	NKX2-1	1.69333	5.99283	230.338	3.76933e-17	2.02733e-14	clusterARC precursors_vs_others	ARC precursors
EYS	EYS	1.87208	7.73892	290.218	8.92004e-17	4.65652e-14	clusterARC precursors_vs_others	ARC precursors
SOX1-OT	SOX1-OT	2.27843	4.58096	215.008	1.09289e-16	5.54221e-14	clusterARC precursors_vs_others	ARC precursors
RAX	RAX	2.50091	5.83232	260.066	1.62027e-16	7.98836e-14	clusterARC precursors_vs_others	ARC precursors
MIR2052HG	MIR2052HG	1.66235	5.88467	208.351	1.77105e-16	8.49575e-14	clusterARC precursors_vs_others	ARC precursors
AC100800.1	AC100800.1	1.57377	6.02588	205.622	2.16692e-16	1.01212e-13	clusterARC precursors_vs_others	ARC precursors
CFAP299	CFAP299	2.7896	4.35503	202.539	2.72923e-16	1.24208e-13	clusterARC precursors_vs_others	ARC precursors
AC084361.1	AC084361.1	1.84868	6.74798	212.644	5.10906e-16	2.26702e-13	clusterARC precursors_vs_others	ARC precursors
SLCO5A1	SLCO5A1	1.70727	5.70968	189.209	7.66947e-16	3.24108e-13	clusterARC precursors_vs_others	ARC precursors
CHD7	CHD7	1.34158	7.90247	188.001	8.448e-16	3.48706e-13	clusterARC precursors_vs_others	ARC precursors
RNF165	RNF165	1.51814	6.52166	187.705	8.65077e-16	3.4896e-13	clusterARC precursors_vs_others	ARC precursors
SVOP	SVOP	2.4093	6.03295	199.193	1.03608e-15	4.08653e-13	clusterARC precursors_vs_others	ARC precursors
GLCCI1	GLCCI1	1.26675	7.93106	180.161	1.60282e-15	6.18443e-13	clusterARC precursors_vs_others	ARC precursors
SOX5	SOX5	1.24665	10.2872	179.279	1.72502e-15	6.51435e-13	clusterARC precursors_vs_others	ARC precursors
AC093610.1	AC093610.1	5.86311	2.23612	223.621	2.27405e-15	8.3021e-13	clusterARC precursors_vs_others	ARC precursors
TOX	TOX	1.31624	9.38502	175.903	2.29198e-15	8.3021e-13	clusterARC precursors_vs_others	ARC precursors
GNG2	GNG2	1.17092	7.83599	175.561	2.35942e-15	8.37548e-13	clusterARC precursors_vs_others	ARC precursors
MIB1	MIB1	1.14801	7.84583	174.692	2.54079e-15	8.84244e-13	clusterARC precursors_vs_others	ARC precursors
SOX11	SOX11	1.27917	7.40385	172.666	3.0229e-15	1.0318e-12	clusterARC precursors_vs_others	ARC precursors
PALM2-AKAP2	PALM2-AKAP2	1.52502	7.34601	187.475	3.60247e-15	1.18408e-12	clusterARC precursors_vs_others	ARC precursors
SALL3	SALL3	3.10322	4.05067	170.162	3.75582e-15	1.21204e-12	clusterARC precursors_vs_others	ARC precursors
SPARCL1	SPARCL1	2.30349	6.82588	302.018	5.42813e-15	1.72043e-12	clusterARC precursors_vs_others	ARC precursors
ISL1	ISL1	1.64522	7.32989	161.408	8.19682e-15	2.55238e-12	clusterARC precursors_vs_others	ARC precursors
GAB2	GAB2	1.10343	8.44419	160.9	8.58607e-15	2.62749e-12	clusterARC precursors_vs_others	ARC precursors
ELAVL3	ELAVL3	1.15572	7.08328	160.094	9.24322e-15	2.78064e-12	clusterARC precursors_vs_others	ARC precursors
AL132857.1	AL132857.1	1.58943	5.30688	159.291	9.95113e-15	2.89545e-12	clusterARC precursors_vs_others	ARC precursors
CCND1	CCND1	2.90616	4.1876	169.413	1.05263e-14	3.01342e-12	clusterARC precursors_vs_others	ARC precursors
SLC18A1	SLC18A1	4.4006	2.72034	181.238	1.15999e-14	3.26804e-12	clusterARC precursors_vs_others	ARC precursors
BTG2	BTG2	1.62135	4.47371	156.551	1.28327e-14	3.55047e-12	clusterARC precursors_vs_others	ARC precursors
PTPRB	PTPRB	2.04315	4.66864	156.41	1.30025e-14	3.55047e-12	clusterARC precursors_vs_others	ARC precursors
MNS1	MNS1	1.11045	6.76924	154.291	1.58696e-14	4.25864e-12	clusterARC precursors_vs_others	ARC precursors
SMOC1	SMOC1	3.17869	5.18318	272.13	1.60758e-14	4.25864e-12	clusterARC precursors_vs_others	ARC precursors
PSD3	PSD3	1.37807	8.86539	166.199	2.31896e-14	5.9651e-12	clusterARC precursors_vs_others	ARC precursors
RNPC3	RNPC3	1.36936	6.85753	158.159	2.78754e-14	7.06801e-12	clusterARC precursors_vs_others	ARC precursors
ACVR2A	ACVR2A	1.25835	7.05191	148.846	2.86791e-14	7.07053e-12	clusterARC precursors_vs_others	ARC precursors
AC061958.1	AC061958.1	1.68934	7.37713	193.283	2.86821e-14	7.07053e-12	clusterARC precursors_vs_others	ARC precursors
MIR7-3HG	MIR7-3HG	1.69773	6.62749	147.365	3.09296e-14	7.41851e-12	clusterARC precursors_vs_others	ARC precursors
MLLT11	MLLT11	1.68687	5.5291	146.385	3.40618e-14	8.06083e-12	clusterARC precursors_vs_others	ARC precursors
CCND2	CCND2	1.9073	5.06986	156.343	3.71686e-14	8.68033e-12	clusterARC precursors_vs_others	ARC precursors
PIK3R3	PIK3R3	1.1281	7.86853	142.372	5.08442e-14	1.15697e-11	clusterARC precursors_vs_others	ARC precursors
ASCL1	ASCL1	4.43296	2.38055	159.243	6.59992e-14	1.48281e-11	clusterARC precursors_vs_others	ARC precursors
CCDC88C	CCDC88C	1.75921	4.90679	139.273	6.97128e-14	1.54666e-11	clusterARC precursors_vs_others	ARC precursors
AC025165.2	AC025165.2	1.47228	5.55649	135.537	1.02774e-13	2.25203e-11	clusterARC precursors_vs_others	ARC precursors
DLL1	DLL1	4.30471	4.19531	250.97	1.05397e-13	2.28133e-11	clusterARC precursors_vs_others	ARC precursors
AC079052.1	AC079052.1	1.01489	8.5552	134.523	1.14349e-13	2.44529e-11	clusterARC precursors_vs_others	ARC precursors
TEAD2	TEAD2	2.59668	3.96486	142.05	1.22499e-13	2.57919e-11	clusterARC precursors_vs_others	ARC precursors
NRCAM	NRCAM	1.139	8.92439	133.795	1.23518e-13	2.57919e-11	clusterARC precursors_vs_others	ARC precursors
DPP10-AS1	DPP10-AS1	3.97888	2.40963	141.444	1.29895e-13	2.65037e-11	clusterARC precursors_vs_others	ARC precursors
ROBO2	ROBO2	1.62562	9.50682	182.947	1.29913e-13	2.65037e-11	clusterARC precursors_vs_others	ARC precursors
ST18	ST18	2.66136	6.84762	291.681	1.38194e-13	2.78728e-11	clusterARC precursors_vs_others	ARC precursors
SVIL	SVIL	1.17944	8.00919	132.863	1.53897e-13	3.06912e-11	clusterARC precursors_vs_others	ARC precursors
SH3BP4	SH3BP4	1.70244	4.66878	130.133	1.82955e-13	3.60808e-11	clusterARC precursors_vs_others	ARC precursors
NXPH1	NXPH1	3.14112	6.38737	304.565	1.95042e-13	3.80418e-11	clusterARC precursors_vs_others	ARC precursors
SMS	SMS	1.09334	6.08387	127.615	2.40905e-13	4.61052e-11	clusterARC precursors_vs_others	ARC precursors
AC022101.1	AC022101.1	1.75864	5.87838	162.548	2.41579e-13	4.61052e-11	clusterARC precursors_vs_others	ARC precursors
KIF19	KIF19	3.18125	3.0662	134.207	2.65867e-13	4.99388e-11	clusterARC precursors_vs_others	ARC precursors
SNCAIP	SNCAIP	1.83922	6.81482	197.54	2.71428e-13	5.0183e-11	clusterARC precursors_vs_others	ARC precursors
MYO10	MYO10	1.77215	6.82163	186.479	2.82168e-13	5.11812e-11	clusterARC precursors_vs_others	ARC precursors
BCL11A	BCL11A	2.06078	6.82245	219.645	2.82594e-13	5.11812e-11	clusterARC precursors_vs_others	ARC precursors
RHBDL3	RHBDL3	2.5066	4.02232	134.08	3.26821e-13	5.85934e-11	clusterARC precursors_vs_others	ARC precursors
LINC00299	LINC00299	4.60955	2.20651	140.816	3.33301e-13	5.91577e-11	clusterARC precursors_vs_others	ARC precursors
RFTN2	RFTN2	1.42076	5.14972	124.524	3.39763e-13	5.97075e-11	clusterARC precursors_vs_others	ARC precursors
SLC6A16	SLC6A16	1.66868	5.05583	123.891	3.6483e-13	6.3484e-11	clusterARC precursors_vs_others	ARC precursors
AC087490.1	AC087490.1	1.4072	6.58069	130.276	4.00031e-13	6.89336e-11	clusterARC precursors_vs_others	ARC precursors
NOTCH1	NOTCH1	2.49025	4.05291	122.539	4.25171e-13	7.20157e-11	clusterARC precursors_vs_others	ARC precursors
ENO4	ENO4	1.06908	6.81144	122.522	4.26032e-13	7.20157e-11	clusterARC precursors_vs_others	ARC precursors
RASSF8	RASSF8	1.01557	7.00004	122.373	4.33274e-13	7.25488e-11	clusterARC precursors_vs_others	ARC precursors
EPHB1	EPHB1	1.32918	6.85725	135.768	4.4033e-13	7.30414e-11	clusterARC precursors_vs_others	ARC precursors
P2RX3	P2RX3	2.49572	4.11128	137.483	4.46633e-13	7.34008e-11	clusterARC precursors_vs_others	ARC precursors
NREP	NREP	1.07388	7.85706	121.863	4.59212e-13	7.47757e-11	clusterARC precursors_vs_others	ARC precursors
SOX21-AS1	SOX21-AS1	2.62894	3.35077	120.928	5.11141e-13	8.2475e-11	clusterARC precursors_vs_others	ARC precursors
PPFIA2-AS1	PPFIA2-AS1	1.21765	6.84687	120.715	5.23858e-13	8.30451e-11	clusterARC precursors_vs_others	ARC precursors
PLEKHG4B	PLEKHG4B	1.19351	6.66064	120.712	5.24033e-13	8.30451e-11	clusterARC precursors_vs_others	ARC precursors
GRIA2	GRIA2	1.01471	8.49309	117.338	7.75852e-13	1.20795e-10	clusterARC precursors_vs_others	ARC precursors
ABO	ABO	2.05097	3.93223	117.201	7.88528e-13	1.21641e-10	clusterARC precursors_vs_others	ARC precursors
STARD4-AS1	STARD4-AS1	0.930956	8.71331	117.131	7.94995e-13	1.21641e-10	clusterARC precursors_vs_others	ARC precursors
OS9	OS9	1.18571	5.93473	116.866	8.20259e-13	1.24434e-10	clusterARC precursors_vs_others	ARC precursors
AC010729.2	AC010729.2	1.76728	4.17516	116.498	8.56663e-13	1.28855e-10	clusterARC precursors_vs_others	ARC precursors
MOB3B	MOB3B	1.75811	5.26637	129.89	8.78246e-13	1.30991e-10	clusterARC precursors_vs_others	ARC precursors
DDR1	DDR1	1.31665	4.72808	113.409	1.2393e-12	1.81788e-10	clusterARC precursors_vs_others	ARC precursors
AL807761.4	AL807761.4	0.98604	7.22297	113.276	1.25932e-12	1.83211e-10	clusterARC precursors_vs_others	ARC precursors
AC005481.1	AC005481.1	1.57777	4.50867	111.573	1.549e-12	2.23522e-10	clusterARC precursors_vs_others	ARC precursors
NELL2	NELL2	2.77321	7.80546	282.808	1.82449e-12	2.61153e-10	clusterARC precursors_vs_others	ARC precursors
SLCO1C1	SLCO1C1	1.76139	7.43353	160.115	1.86244e-12	2.64452e-10	clusterARC precursors_vs_others	ARC precursors
FGD4	FGD4	1.1887	7.00691	117.748	1.89174e-12	2.66481e-10	clusterARC precursors_vs_others	ARC precursors
GOLGA6L2	GOLGA6L2	4.99711	1.14269	122.349	2.03325e-12	2.84158e-10	clusterARC precursors_vs_others	ARC precursors
IRF2	IRF2	1.41991	5.09846	108.854	2.16656e-12	3.00424e-10	clusterARC precursors_vs_others	ARC precursors
DCX	DCX	1.28502	8.60479	119.756	3.08289e-12	4.20909e-10	clusterARC precursors_vs_others	ARC precursors
AC112487.1	AC112487.1	2.93718	7.64335	267.75	3.32033e-12	4.49866e-10	clusterARC precursors_vs_others	ARC precursors
PTMS	PTMS	1.04073	6.47481	105.253	3.41312e-12	4.58936e-10	clusterARC precursors_vs_others	ARC precursors
MFNG	MFNG	5.18884	1.25699	115.93	4.01401e-12	5.35674e-10	clusterARC precursors_vs_others	ARC precursors
ID2	ID2	1.63932	4.734	101.804	5.33331e-12	6.90955e-10	clusterARC precursors_vs_others	ARC precursors
AC022034.3	AC022034.3	1.7694	4.88376	101.714	5.39665e-12	6.94095e-10	clusterARC precursors_vs_others	ARC precursors
SYT5	SYT5	2.25073	5.86836	106.767	5.51189e-12	7.03816e-10	clusterARC precursors_vs_others	ARC precursors
IMMP2L	IMMP2L	0.994934	8.42421	101.231	5.75015e-12	7.28996e-10	clusterARC precursors_vs_others	ARC precursors
STMN4	STMN4	2.31063	5.73193	105.114	6.7409e-12	8.4854e-10	clusterARC precursors_vs_others	ARC precursors
AC021915.1	AC021915.1	3.79894	2.49817	109.769	7.93628e-12	9.91979e-10	clusterARC precursors_vs_others	ARC precursors
SYNE2	SYNE2	1.36501	7.20023	126.58	8.72043e-12	1.08037e-09	clusterARC precursors_vs_others	ARC precursors
LINC00354	LINC00354	1.64243	4.22675	97.2556	9.78016e-12	1.19716e-09	clusterARC precursors_vs_others	ARC precursors
AC132153.1	AC132153.1	2.96432	3.98725	139.146	1.27709e-11	1.54198e-09	clusterARC precursors_vs_others	ARC precursors
SHB	SHB	1.2342	5.6551	94.6643	1.3947e-11	1.6726e-09	clusterARC precursors_vs_others	ARC precursors
FAM53B	FAM53B	1.28125	4.61771	94.5172	1.42338e-11	1.68478e-09	clusterARC precursors_vs_others	ARC precursors
MYO1B	MYO1B	1.62837	6.68517	143.322	1.42384e-11	1.68478e-09	clusterARC precursors_vs_others	ARC precursors
PHACTR3	PHACTR3	1.20584	6.11126	94.3795	1.4508e-11	1.70531e-09	clusterARC precursors_vs_others	ARC precursors
L1TD1	L1TD1	4.52931	3.57647	168.321	1.55318e-11	1.80225e-09	clusterARC precursors_vs_others	ARC precursors
ZNF462	ZNF462	0.978078	8.14673	93.8867	1.55358e-11	1.80225e-09	clusterARC precursors_vs_others	ARC precursors
AC115837.2	AC115837.2	1.88474	3.83459	93.3456	1.67536e-11	1.92577e-09	clusterARC precursors_vs_others	ARC precursors
TMEM131L	TMEM131L	1.34855	6.00562	102.504	2.01844e-11	2.26743e-09	clusterARC precursors_vs_others	ARC precursors
PARP14	PARP14	1.64292	4.48534	91.4193	2.1975e-11	2.44808e-09	clusterARC precursors_vs_others	ARC precursors
RNF24	RNF24	0.815443	7.51929	91.3894	2.20685e-11	2.44808e-09	clusterARC precursors_vs_others	ARC precursors
L1CAM	L1CAM	1.6285	5.76138	91.0754	2.30754e-11	2.54389e-09	clusterARC precursors_vs_others	ARC precursors
CAMK1D	CAMK1D	1.73176	7.62903	153.29	2.37306e-11	2.59997e-09	clusterARC precursors_vs_others	ARC precursors
KANK4	KANK4	2.44618	4.43111	123.253	2.48588e-11	2.69036e-09	clusterARC precursors_vs_others	ARC precursors
IQSEC3	IQSEC3	2.0427	5.83217	94.5509	2.59168e-11	2.78787e-09	clusterARC precursors_vs_others	ARC precursors
EFS	EFS	1.55513	4.17945	89.8159	2.76301e-11	2.95426e-09	clusterARC precursors_vs_others	ARC precursors
AC119150.1	AC119150.1	1.76331	5.06755	111.208	2.89981e-11	3.08196e-09	clusterARC precursors_vs_others	ARC precursors
APC	APC	1.06856	8.62382	95.0717	3.08208e-11	3.23692e-09	clusterARC precursors_vs_others	ARC precursors
MAP2	MAP2	0.978626	10.1263	88.9877	3.1136e-11	3.25078e-09	clusterARC precursors_vs_others	ARC precursors
AL008633.1	AL008633.1	0.955069	7.93386	88.8876	3.15904e-11	3.27623e-09	clusterARC precursors_vs_others	ARC precursors
MAPKAPK2	MAPKAPK2	1.40171	4.50082	88.8531	3.17489e-11	3.27623e-09	clusterARC precursors_vs_others	ARC precursors
PRDM16	PRDM16	1.27525	5.47365	88.5572	3.31409e-11	3.4001e-09	clusterARC precursors_vs_others	ARC precursors
INSM1	INSM1	4.20535	2.32352	103.259	3.48767e-11	3.55762e-09	clusterARC precursors_vs_others	ARC precursors
ARHGEF2	ARHGEF2	1.28788	4.87961	88.0398	3.57329e-11	3.62413e-09	clusterARC precursors_vs_others	ARC precursors
PPFIA2	PPFIA2	0.932845	8.50393	87.9625	3.61384e-11	3.64443e-09	clusterARC precursors_vs_others	ARC precursors
PROX1	PROX1	2.18622	4.35826	95.3379	3.83247e-11	3.84308e-09	clusterARC precursors_vs_others	ARC precursors
AC069228.1	AC069228.1	1.02788	8.45053	87.7485	4.01977e-11	4.00825e-09	clusterARC precursors_vs_others	ARC precursors
C14orf39	C14orf39	0.951959	6.67855	87.0685	4.11941e-11	4.06197e-09	clusterARC precursors_vs_others	ARC precursors
AC021915.2	AC021915.2	3.49294	2.53445	95.7844	4.19714e-11	4.081e-09	clusterARC precursors_vs_others	ARC precursors
ANK2	ANK2	0.859641	10.0266	86.1871	4.69156e-11	4.50111e-09	clusterARC precursors_vs_others	ARC precursors
TRPC5OS	TRPC5OS	2.07325	5.54153	86.3582	4.88737e-11	4.66376e-09	clusterARC precursors_vs_others	ARC precursors
LRRN3	LRRN3	0.933589	5.66264	85.6305	5.0956e-11	4.83646e-09	clusterARC precursors_vs_others	ARC precursors
SGCZ	SGCZ	1.47836	7.84583	105.707	5.25131e-11	4.95774e-09	clusterARC precursors_vs_others	ARC precursors
DDX60L	DDX60L	2.45631	3.26097	85.1512	5.47303e-11	5.13972e-09	clusterARC precursors_vs_others	ARC precursors
MAP6	MAP6	0.967881	7.12713	85.052	5.55482e-11	5.18907e-09	clusterARC precursors_vs_others	ARC precursors
LHCGR	LHCGR	2.06707	3.84822	84.7272	5.83155e-11	5.41907e-09	clusterARC precursors_vs_others	ARC precursors
AFDN	AFDN	0.820869	8.25525	83.9605	6.54425e-11	6.04968e-09	clusterARC precursors_vs_others	ARC precursors
KCNN1	KCNN1	1.64795	4.24345	83.4472	7.07255e-11	6.48617e-09	clusterARC precursors_vs_others	ARC precursors
LINC02715	LINC02715	4.51522	1.40447	91.679	7.08951e-11	6.48617e-09	clusterARC precursors_vs_others	ARC precursors
TEAD1	TEAD1	0.854772	8.66784	83.1992	7.34362e-11	6.6842e-09	clusterARC precursors_vs_others	ARC precursors
CCNJL	CCNJL	1.39082	4.50017	82.3758	8.32551e-11	7.53926e-09	clusterARC precursors_vs_others	ARC precursors
DOP1B	DOP1B	1.01685	6.44135	82.3057	8.41531e-11	7.58189e-09	clusterARC precursors_vs_others	ARC precursors
AC027288.3	AC027288.3	0.889142	8.84712	81.7457	9.17018e-11	8.22028e-09	clusterARC precursors_vs_others	ARC precursors
CDKN1C	CDKN1C	1.55475	5.47116	103.559	9.61814e-11	8.53561e-09	clusterARC precursors_vs_others	ARC precursors
TP53INP1	TP53INP1	1.03725	5.16301	80.8378	1.055e-10	9.31602e-09	clusterARC precursors_vs_others	ARC precursors
NYAP2	NYAP2	2.35999	6.6859	151.956	1.16017e-10	1.01437e-08	clusterARC precursors_vs_others	ARC precursors
OPN3	OPN3	2.34263	3.45317	79.8787	1.22486e-10	1.06568e-08	clusterARC precursors_vs_others	ARC precursors
CPNE4	CPNE4	2.13893	7.17618	162.055	1.23194e-10	1.06662e-08	clusterARC precursors_vs_others	ARC precursors
LINC01416	LINC01416	1.54631	4.33152	79.0664	1.39131e-10	1.18722e-08	clusterARC precursors_vs_others	ARC precursors
HTATSF1	HTATSF1	1.03967	6.44948	78.656	1.48433e-10	1.26055e-08	clusterARC precursors_vs_others	ARC precursors
STMN2	STMN2	1.58527	8.91605	117.681	1.5358e-10	1.29804e-08	clusterARC precursors_vs_others	ARC precursors
TRIT1	TRIT1	0.88506	6.49297	78.1366	1.61158e-10	1.35564e-08	clusterARC precursors_vs_others	ARC precursors
KCNH8	KCNH8	1.60923	7.82614	122.566	1.92364e-10	1.60294e-08	clusterARC precursors_vs_others	ARC precursors
AC021504.1	AC021504.1	0.967422	7.69808	80.1669	1.97519e-10	1.63821e-08	clusterARC precursors_vs_others	ARC precursors
BEST3	BEST3	4.29047	1.55603	83.5334	2.11825e-10	1.7406e-08	clusterARC precursors_vs_others	ARC precursors
APBA2	APBA2	0.835756	6.88745	76.027	2.25978e-10	1.83986e-08	clusterARC precursors_vs_others	ARC precursors
PTPRS	PTPRS	0.724884	8.3878	75.8725	2.31704e-10	1.87786e-08	clusterARC precursors_vs_others	ARC precursors
CXXC4	CXXC4	0.926346	6.99631	75.8085	2.34118e-10	1.8888e-08	clusterARC precursors_vs_others	ARC precursors
ATCAY	ATCAY	1.01385	6.44518	75.2625	2.55839e-10	2.03628e-08	clusterARC precursors_vs_others	ARC precursors
MIR4713HG	MIR4713HG	1.90525	3.38976	74.9401	2.6966e-10	2.13669e-08	clusterARC precursors_vs_others	ARC precursors
SHTN1	SHTN1	0.912693	7.2875	74.8546	2.73453e-10	2.15712e-08	clusterARC precursors_vs_others	ARC precursors
MYT1	MYT1	1.33223	5.11438	74.5232	2.88705e-10	2.24746e-08	clusterARC precursors_vs_others	ARC precursors
NPAS2	NPAS2	1.31311	5.21202	76.5213	2.96477e-10	2.29789e-08	clusterARC precursors_vs_others	ARC precursors
TCF3	TCF3	1.07061	5.30888	73.9075	3.19481e-10	2.45475e-08	clusterARC precursors_vs_others	ARC precursors
PTPRZ1	PTPRZ1	1.66116	7.43341	122.707	3.2642e-10	2.49726e-08	clusterARC precursors_vs_others	ARC precursors
AL158013.1	AL158013.1	2.21286	3.52945	73.6894	3.31195e-10	2.52291e-08	clusterARC precursors_vs_others	ARC precursors
PIK3AP1	PIK3AP1	2.29977	2.36248	73.4587	3.44083e-10	2.60989e-08	clusterARC precursors_vs_others	ARC precursors
DPP10-AS3	DPP10-AS3	5.15454	2.58587	128.339	3.65974e-10	2.75464e-08	clusterARC precursors_vs_others	ARC precursors
SMAD3	SMAD3	1.44657	5.44575	75.9855	3.84748e-10	2.86928e-08	clusterARC precursors_vs_others	ARC precursors
METAP1D	METAP1D	3.29051	5.53571	1122.36	1.39372e-28	2.47372e-24	clusterDLX6-AS1+ neurons_vs_others	DLX6-AS1+ neurons
GRIA21	GRIA2	2.56713	8.49309	926.22	3.84528e-27	3.4125e-23	clusterDLX6-AS1+ neurons_vs_others	DLX6-AS1+ neurons
MIR7-3HG1	MIR7-3HG	3.29598	6.62749	774.669	8.24641e-26	4.87885e-22	clusterDLX6-AS1+ neurons_vs_others	DLX6-AS1+ neurons
MYT1L	MYT1L	3.36325	7.72063	725.684	2.51494e-25	1.11594e-21	clusterDLX6-AS1+ neurons_vs_others	DLX6-AS1+ neurons
NRXN3	NRXN3	3.06368	10.3721	902.788	1.1069e-24	3.92926e-21	clusterDLX6-AS1+ neurons_vs_others	DLX6-AS1+ neurons
ISL11	ISL1	2.9291	7.32989	610.876	4.67894e-24	1.38411e-20	clusterDLX6-AS1+ neurons_vs_others	DLX6-AS1+ neurons
CELF4	CELF4	2.11123	7.99406	552.901	2.51202e-23	6.3694e-20	clusterDLX6-AS1+ neurons_vs_others	DLX6-AS1+ neurons
DLX5	DLX5	4.73399	3.42924	489.818	1.9096e-22	4.23668e-19	clusterDLX6-AS1+ neurons_vs_others	DLX6-AS1+ neurons
HTATSF11	HTATSF1	2.32329	6.44948	459.73	5.48501e-22	1.0817e-18	clusterDLX6-AS1+ neurons_vs_others	DLX6-AS1+ neurons
LINC01917	LINC01917	3.62524	4.59905	478.151	6.20702e-22	1.10168e-18	clusterDLX6-AS1+ neurons_vs_others	DLX6-AS1+ neurons
ZCCHC12	ZCCHC12	4.59958	5.64759	571.13	7.49574e-22	1.1404e-18	clusterDLX6-AS1+ neurons_vs_others	DLX6-AS1+ neurons
AC004470.1	AC004470.1	5.14535	2.84131	450.393	7.71015e-22	1.1404e-18	clusterDLX6-AS1+ neurons_vs_others	DLX6-AS1+ neurons
MARCH4	MARCH4	3.02112	6.31068	489.16	1.24776e-21	1.70358e-18	clusterDLX6-AS1+ neurons_vs_others	DLX6-AS1+ neurons
PTPRN	PTPRN	3.8262	6.49945	480.899	1.55667e-21	1.97353e-18	clusterDLX6-AS1+ neurons_vs_others	DLX6-AS1+ neurons
AC022469.2	AC022469.2	3.64998	4.86525	467.112	2.00512e-21	2.37259e-18	clusterDLX6-AS1+ neurons_vs_others	DLX6-AS1+ neurons
TUBB2A	TUBB2A	2.99437	6.56411	423.142	2.16545e-21	2.40216e-18	clusterDLX6-AS1+ neurons_vs_others	DLX6-AS1+ neurons
AC008056.1	AC008056.1	2.31138	8.38635	486.147	2.41003e-21	2.51621e-18	clusterDLX6-AS1+ neurons_vs_others	DLX6-AS1+ neurons
SVOP1	SVOP	3.21891	6.03295	460.639	3.06841e-21	2.94233e-18	clusterDLX6-AS1+ neurons_vs_others	DLX6-AS1+ neurons
PTCHD1-AS	PTCHD1-AS	3.44789	5.53347	621.92	3.14971e-21	2.94233e-18	clusterDLX6-AS1+ neurons_vs_others	DLX6-AS1+ neurons
TSPAN7	TSPAN7	2.58558	6.56987	392.362	7.50572e-21	6.66095e-18	clusterDLX6-AS1+ neurons_vs_others	DLX6-AS1+ neurons
SCN2A	SCN2A	2.28626	6.98268	383.56	1.08879e-20	9.20238e-18	clusterDLX6-AS1+ neurons_vs_others	DLX6-AS1+ neurons
LINC01201	LINC01201	5.64266	4.25663	486.725	1.64221e-20	1.32489e-17	clusterDLX6-AS1+ neurons_vs_others	DLX6-AS1+ neurons
L1CAM1	L1CAM	2.90843	5.76138	370.458	1.92232e-20	1.42609e-17	clusterDLX6-AS1+ neurons_vs_others	DLX6-AS1+ neurons
LINC00599	LINC00599	2.67992	5.58006	370.387	1.92834e-20	1.42609e-17	clusterDLX6-AS1+ neurons_vs_others	DLX6-AS1+ neurons
TMEM59L	TMEM59L	2.56049	6.69364	368.718	2.07593e-20	1.47382e-17	clusterDLX6-AS1+ neurons_vs_others	DLX6-AS1+ neurons
PHACTR31	PHACTR3	2.16744	6.11126	347.735	5.38958e-20	3.64388e-17	clusterDLX6-AS1+ neurons_vs_others	DLX6-AS1+ neurons
LINC02641	LINC02641	2.753	4.52772	347.134	5.54312e-20	3.64388e-17	clusterDLX6-AS1+ neurons_vs_others	DLX6-AS1+ neurons
AC008056.2	AC008056.2	2.47848	5.62816	336.72	9.08384e-20	5.75818e-17	clusterDLX6-AS1+ neurons_vs_others	DLX6-AS1+ neurons
DLX6	DLX6	5.05648	2.91254	366.18	1.10466e-19	6.76087e-17	clusterDLX6-AS1+ neurons_vs_others	DLX6-AS1+ neurons
SCG3	SCG3	2.58666	6.54989	327.125	1.44983e-19	8.57765e-17	clusterDLX6-AS1+ neurons_vs_others	DLX6-AS1+ neurons
HECW1	HECW1	2.20518	6.42561	311.653	3.16472e-19	1.81195e-16	clusterDLX6-AS1+ neurons_vs_others	DLX6-AS1+ neurons
CHGB	CHGB	3.62089	6.36674	341.197	3.28755e-19	1.82346e-16	clusterDLX6-AS1+ neurons_vs_others	DLX6-AS1+ neurons
POLR1D	POLR1D	1.81408	5.88181	298.578	6.29284e-19	3.38459e-16	clusterDLX6-AS1+ neurons_vs_others	DLX6-AS1+ neurons
ADAM22	ADAM22	1.5365	7.34822	292.82	8.59127e-19	4.46751e-16	clusterDLX6-AS1+ neurons_vs_others	DLX6-AS1+ neurons
ATP1A3	ATP1A3	2.58695	6.23528	292.36	8.80968e-19	4.46751e-16	clusterDLX6-AS1+ neurons_vs_others	DLX6-AS1+ neurons
MLLT111	MLLT11	2.2976	5.5291	290.935	9.52415e-19	4.69567e-16	clusterDLX6-AS1+ neurons_vs_others	DLX6-AS1+ neurons
ANK1	ANK1	2.52765	5.53916	287.709	1.13781e-18	5.45809e-16	clusterDLX6-AS1+ neurons_vs_others	DLX6-AS1+ neurons
TRPC4	TRPC4	2.76608	4.75671	313.402	1.69791e-18	7.93056e-16	clusterDLX6-AS1+ neurons_vs_others	DLX6-AS1+ neurons
CCDC85A	CCDC85A	3.03602	5.98392	496.785	1.81048e-18	8.23956e-16	clusterDLX6-AS1+ neurons_vs_others	DLX6-AS1+ neurons
ARHGAP36	ARHGAP36	6.30681	2.91653	432.4	1.8962e-18	8.41389e-16	clusterDLX6-AS1+ neurons_vs_others	DLX6-AS1+ neurons
SYT51	SYT5	3.21712	5.86836	302.692	2.05459e-18	8.89439e-16	clusterDLX6-AS1+ neurons_vs_others	DLX6-AS1+ neurons
SCG5	SCG5	2.27931	6.59949	278.385	2.42694e-18	1.01796e-15	clusterDLX6-AS1+ neurons_vs_others	DLX6-AS1+ neurons
MAPT	MAPT	1.89403	7.40635	274.045	2.46617e-18	1.01796e-15	clusterDLX6-AS1+ neurons_vs_others	DLX6-AS1+ neurons
SYP	SYP	1.91443	6.51079	266.76	3.77803e-18	1.52401e-15	clusterDLX6-AS1+ neurons_vs_others	DLX6-AS1+ neurons
IQSEC31	IQSEC3	2.98296	5.83217	287.179	4.56604e-18	1.80095e-15	clusterDLX6-AS1+ neurons_vs_others	DLX6-AS1+ neurons
SYCP2	SYCP2	2.11068	5.70509	262.652	4.82748e-18	1.83506e-15	clusterDLX6-AS1+ neurons_vs_others	DLX6-AS1+ neurons
AC069155.1	AC069155.1	2.74471	4.95188	263.861	4.85931e-18	1.83506e-15	clusterDLX6-AS1+ neurons_vs_others	DLX6-AS1+ neurons
DLGAP2	DLGAP2	3.29133	8.4938	601.15	5.10425e-18	1.8874e-15	clusterDLX6-AS1+ neurons_vs_others	DLX6-AS1+ neurons
NMNAT3	NMNAT3	1.34645	7.49974	261.322	5.23001e-18	1.89444e-15	clusterDLX6-AS1+ neurons_vs_others	DLX6-AS1+ neurons
TUBB2B	TUBB2B	1.53375	7.10074	259.19	5.95076e-18	2.07098e-15	clusterDLX6-AS1+ neurons_vs_others	DLX6-AS1+ neurons
STMN41	STMN4	3.24067	5.73193	277.761	7.55774e-18	2.57966e-15	clusterDLX6-AS1+ neurons_vs_others	DLX6-AS1+ neurons
XKR4	XKR4	1.84832	8.71266	281.341	8.093e-18	2.71024e-15	clusterDLX6-AS1+ neurons_vs_others	DLX6-AS1+ neurons
AC016642.1	AC016642.1	1.83516	7.21349	250.536	1.01496e-17	3.33603e-15	clusterDLX6-AS1+ neurons_vs_others	DLX6-AS1+ neurons
AC016650.1	AC016650.1	4.23453	5.32082	375.595	1.27477e-17	4.1138e-15	clusterDLX6-AS1+ neurons_vs_others	DLX6-AS1+ neurons
RGS7	RGS7	2.12138	8.06806	323.57	1.3273e-17	4.20684e-15	clusterDLX6-AS1+ neurons_vs_others	DLX6-AS1+ neurons
GNAO1	GNAO1	1.48591	6.85017	242.182	1.72622e-17	5.3752e-15	clusterDLX6-AS1+ neurons_vs_others	DLX6-AS1+ neurons
NSG2	NSG2	3.6845	4.42047	256.578	2.48857e-17	7.61544e-15	clusterDLX6-AS1+ neurons_vs_others	DLX6-AS1+ neurons
SCML4	SCML4	3.33857	4.62353	252.482	3.16512e-17	9.52163e-15	clusterDLX6-AS1+ neurons_vs_others	DLX6-AS1+ neurons
CYSLTR2	CYSLTR2	2.0432	6.10422	242.699	3.9954e-17	1.1819e-14	clusterDLX6-AS1+ neurons_vs_others	DLX6-AS1+ neurons
GNAS	GNAS	1.31007	9.53275	226.405	4.92353e-17	1.43259e-14	clusterDLX6-AS1+ neurons_vs_others	DLX6-AS1+ neurons
TTC9B	TTC9B	3.43079	5.06058	242.957	5.61284e-17	1.60455e-14	clusterDLX6-AS1+ neurons_vs_others	DLX6-AS1+ neurons
PLCXD3	PLCXD3	3.28773	5.01042	354.758	5.69533e-17	1.60455e-14	clusterDLX6-AS1+ neurons_vs_others	DLX6-AS1+ neurons
RASGRF1	RASGRF1	3.89512	3.82973	228.294	1.41091e-16	3.91286e-14	clusterDLX6-AS1+ neurons_vs_others	DLX6-AS1+ neurons
VAT1L	VAT1L	1.71101	8.43391	235.426	1.90798e-16	5.20997e-14	clusterDLX6-AS1+ neurons_vs_others	DLX6-AS1+ neurons
GAD2	GAD2	4.65413	6.94372	634.926	2.21508e-16	5.9569e-14	clusterDLX6-AS1+ neurons_vs_others	DLX6-AS1+ neurons
MARCH11	MARCH11	3.48173	4.81576	266.864	2.26797e-16	5.95877e-14	clusterDLX6-AS1+ neurons_vs_others	DLX6-AS1+ neurons
PTPRN21	PTPRN2	1.20621	9.20381	204.922	2.28292e-16	5.95877e-14	clusterDLX6-AS1+ neurons_vs_others	DLX6-AS1+ neurons
NRP2	NRP2	2.57874	4.85227	243.213	2.34741e-16	6.03829e-14	clusterDLX6-AS1+ neurons_vs_others	DLX6-AS1+ neurons
PTCHD1	PTCHD1	3.91299	2.40137	203.291	2.57917e-16	6.53967e-14	clusterDLX6-AS1+ neurons_vs_others	DLX6-AS1+ neurons
DIRAS3	DIRAS3	6.22639	2.15773	291.016	3.11691e-16	7.79184e-14	clusterDLX6-AS1+ neurons_vs_others	DLX6-AS1+ neurons
DLX1	DLX1	5.35135	2.39602	234.623	3.28574e-16	8.09982e-14	clusterDLX6-AS1+ neurons_vs_others	DLX6-AS1+ neurons
DSCAM	DSCAM	2.23586	8.90315	273.849	5.32185e-16	1.29394e-13	clusterDLX6-AS1+ neurons_vs_others	DLX6-AS1+ neurons
ACTL6B	ACTL6B	3.15221	4.70368	206.423	6.17325e-16	1.48066e-13	clusterDLX6-AS1+ neurons_vs_others	DLX6-AS1+ neurons
INA	INA	2.92577	5.54666	205.725	6.48541e-16	1.5254e-13	clusterDLX6-AS1+ neurons_vs_others	DLX6-AS1+ neurons
ATCAY1	ATCAY	1.5833	6.44518	191.076	6.61219e-16	1.5254e-13	clusterDLX6-AS1+ neurons_vs_others	DLX6-AS1+ neurons
DSCAML1	DSCAML1	1.93654	4.93006	190.832	6.74083e-16	1.5254e-13	clusterDLX6-AS1+ neurons_vs_others	DLX6-AS1+ neurons
RADX	RADX	2.06965	5.84375	204.292	6.77343e-16	1.5254e-13	clusterDLX6-AS1+ neurons_vs_others	DLX6-AS1+ neurons
HMX3	HMX3	6.77677	1.68572	245	6.78949e-16	1.5254e-13	clusterDLX6-AS1+ neurons_vs_others	DLX6-AS1+ neurons
PTPRO	PTPRO	1.303	7.90482	189.357	7.57963e-16	1.66099e-13	clusterDLX6-AS1+ neurons_vs_others	DLX6-AS1+ neurons
GAD1	GAD1	3.03674	5.85663	344.297	7.58017e-16	1.66099e-13	clusterDLX6-AS1+ neurons_vs_others	DLX6-AS1+ neurons
SLC32A1	SLC32A1	5.10902	2.25185	240.229	8.81781e-16	1.90863e-13	clusterDLX6-AS1+ neurons_vs_others	DLX6-AS1+ neurons
SRRM41	SRRM4	1.70759	7.86782	206.548	1.04794e-15	2.24096e-13	clusterDLX6-AS1+ neurons_vs_others	DLX6-AS1+ neurons
DLGAP1-AS4	DLGAP1-AS4	2.47681	6.5566	276.19	1.18346e-15	2.50062e-13	clusterDLX6-AS1+ neurons_vs_others	DLX6-AS1+ neurons
PNOC	PNOC	3.05191	2.99888	182.356	1.33654e-15	2.79085e-13	clusterDLX6-AS1+ neurons_vs_others	DLX6-AS1+ neurons
SCN3B	SCN3B	1.99294	5.50059	179.837	1.64656e-15	3.39824e-13	clusterDLX6-AS1+ neurons_vs_others	DLX6-AS1+ neurons
GLCE	GLCE	1.83971	5.50396	185.752	1.76229e-15	3.59527e-13	clusterDLX6-AS1+ neurons_vs_others	DLX6-AS1+ neurons
ST8SIA3	ST8SIA3	2.93702	5.02156	191.47	1.83444e-15	3.69994e-13	clusterDLX6-AS1+ neurons_vs_others	DLX6-AS1+ neurons
PLPPR5	PLPPR5	2.28273	4.91731	177.122	2.06739e-15	4.12293e-13	clusterDLX6-AS1+ neurons_vs_others	DLX6-AS1+ neurons
DLGAP2-AS1	DLGAP2-AS1	2.5454	4.45327	175.64	2.34372e-15	4.61908e-13	clusterDLX6-AS1+ neurons_vs_others	DLX6-AS1+ neurons
MBNL3	MBNL3	1.7779	7.12927	215.658	2.36822e-15	4.61908e-13	clusterDLX6-AS1+ neurons_vs_others	DLX6-AS1+ neurons
KIF5C	KIF5C	1.23825	8.35377	174.939	2.48785e-15	4.79966e-13	clusterDLX6-AS1+ neurons_vs_others	DLX6-AS1+ neurons
DLX2	DLX2	5.15984	1.77072	186.288	2.72174e-15	5.19443e-13	clusterDLX6-AS1+ neurons_vs_others	DLX6-AS1+ neurons
ENOX2	ENOX2	1.39568	6.38257	173.747	2.75454e-15	5.20111e-13	clusterDLX6-AS1+ neurons_vs_others	DLX6-AS1+ neurons
GRID1-AS1	GRID1-AS1	3.32737	3.94071	182.285	3.71508e-15	6.94094e-13	clusterDLX6-AS1+ neurons_vs_others	DLX6-AS1+ neurons
AF123462.1	AF123462.1	3.58544	3.44565	181.307	4.01205e-15	7.41769e-13	clusterDLX6-AS1+ neurons_vs_others	DLX6-AS1+ neurons
AP001407.1	AP001407.1	4.56503	5.13155	365.846	4.07436e-15	7.45523e-13	clusterDLX6-AS1+ neurons_vs_others	DLX6-AS1+ neurons
PALMD	PALMD	2.75761	3.82207	182.398	4.58915e-15	8.29528e-13	clusterDLX6-AS1+ neurons_vs_others	DLX6-AS1+ neurons
KCND3	KCND3	2.53882	4.32274	173.087	4.62692e-15	8.29528e-13	clusterDLX6-AS1+ neurons_vs_others	DLX6-AS1+ neurons
CNGB1	CNGB1	3.41927	5.12073	197.943	5.74784e-15	1.02018e-12	clusterDLX6-AS1+ neurons_vs_others	DLX6-AS1+ neurons
MAP1LC3A	MAP1LC3A	1.24011	6.82994	163.385	6.85182e-15	1.20409e-12	clusterDLX6-AS1+ neurons_vs_others	DLX6-AS1+ neurons
MDGA2	MDGA2	2.09259	9.05189	274.066	7.47588e-15	1.30088e-12	clusterDLX6-AS1+ neurons_vs_others	DLX6-AS1+ neurons
DCX1	DCX	1.59622	8.60479	189.791	7.58126e-15	1.30103e-12	clusterDLX6-AS1+ neurons_vs_others	DLX6-AS1+ neurons
CELF3	CELF3	2.10355	5.23413	162.038	7.74015e-15	1.30838e-12	clusterDLX6-AS1+ neurons_vs_others	DLX6-AS1+ neurons
KCNJ6	KCNJ6	4.43965	5.94523	424.848	8.02318e-15	1.34343e-12	clusterDLX6-AS1+ neurons_vs_others	DLX6-AS1+ neurons
AC010181.1	AC010181.1	4.15702	1.96123	171.096	9.1522e-15	1.51815e-12	clusterDLX6-AS1+ neurons_vs_others	DLX6-AS1+ neurons
RUNDC3B	RUNDC3B	1.64868	7.1204	174.927	9.52698e-15	1.56569e-12	clusterDLX6-AS1+ neurons_vs_others	DLX6-AS1+ neurons
CTNNA3	CTNNA3	1.46806	8.20034	181.745	9.73376e-15	1.57059e-12	clusterDLX6-AS1+ neurons_vs_others	DLX6-AS1+ neurons
SHANK2	SHANK2	1.16695	7.57977	158.175	1.10329e-14	1.76417e-12	clusterDLX6-AS1+ neurons_vs_others	DLX6-AS1+ neurons
EEF1A2	EEF1A2	2.96152	4.89468	167.983	1.1866e-14	1.88044e-12	clusterDLX6-AS1+ neurons_vs_others	DLX6-AS1+ neurons
CALN1	CALN1	1.53539	6.64045	166.27	1.51296e-14	2.37642e-12	clusterDLX6-AS1+ neurons_vs_others	DLX6-AS1+ neurons
AL445433.2	AL445433.2	2.37969	3.66993	153.948	1.63942e-14	2.53026e-12	clusterDLX6-AS1+ neurons_vs_others	DLX6-AS1+ neurons
NNAT1	NNAT	1.24828	8.93109	150.981	2.17633e-14	3.32997e-12	clusterDLX6-AS1+ neurons_vs_others	DLX6-AS1+ neurons
FAM155A	FAM155A	1.84989	11.4704	224.009	2.50453e-14	3.79939e-12	clusterDLX6-AS1+ neurons_vs_others	DLX6-AS1+ neurons
AC008056.3	AC008056.3	3.1157	4.09264	159.163	2.5328e-14	3.80971e-12	clusterDLX6-AS1+ neurons_vs_others	DLX6-AS1+ neurons
RXFP1	RXFP1	2.83394	3.73899	161.321	2.75473e-14	4.10806e-12	clusterDLX6-AS1+ neurons_vs_others	DLX6-AS1+ neurons
RBP1	RBP1	2.50367	5.18006	173.565	3.34665e-14	4.90906e-12	clusterDLX6-AS1+ neurons_vs_others	DLX6-AS1+ neurons
AP000820.2	AP000820.2	4.1044	6.27326	426.357	3.5976e-14	5.23392e-12	clusterDLX6-AS1+ neurons_vs_others	DLX6-AS1+ neurons
NRSN1	NRSN1	2.95709	4.94059	165.73	3.67454e-14	5.3024e-12	clusterDLX6-AS1+ neurons_vs_others	DLX6-AS1+ neurons
AC012368.1	AC012368.1	2.15127	4.66626	144.272	4.20156e-14	5.96588e-12	clusterDLX6-AS1+ neurons_vs_others	DLX6-AS1+ neurons
MYT11	MYT1	1.81076	5.11438	143.594	4.49659e-14	6.33413e-12	clusterDLX6-AS1+ neurons_vs_others	DLX6-AS1+ neurons
ELAVL31	ELAVL3	1.12778	7.08328	143.119	4.71583e-14	6.59065e-12	clusterDLX6-AS1+ neurons_vs_others	DLX6-AS1+ neurons
SMPD3	SMPD3	2.66753	5.4122	151.057	5.24664e-14	7.27521e-12	clusterDLX6-AS1+ neurons_vs_others	DLX6-AS1+ neurons
POU2F2	POU2F2	1.92099	6.21012	170.026	5.44304e-14	7.48904e-12	clusterDLX6-AS1+ neurons_vs_others	DLX6-AS1+ neurons
SYBU	SYBU	1.59013	6.56232	154.933	5.53276e-14	7.55391e-12	clusterDLX6-AS1+ neurons_vs_others	DLX6-AS1+ neurons
ATP1B1	ATP1B1	1.22774	6.56599	141.253	5.6945e-14	7.7154e-12	clusterDLX6-AS1+ neurons_vs_others	DLX6-AS1+ neurons
GABRG2	GABRG2	3.52185	4.38779	160.075	6.15767e-14	8.27974e-12	clusterDLX6-AS1+ neurons_vs_others	DLX6-AS1+ neurons
DLX6-AS1	DLX6-AS1	5.17349	6.52982	504.963	6.47159e-14	8.63641e-12	clusterDLX6-AS1+ neurons_vs_others	DLX6-AS1+ neurons
HS6ST2	HS6ST2	3.75803	7.5157	451.38	6.79865e-14	8.99602e-12	clusterDLX6-AS1+ neurons_vs_others	DLX6-AS1+ neurons
AC113404.1	AC113404.1	2.78694	4.35194	159.459	6.84243e-14	8.99602e-12	clusterDLX6-AS1+ neurons_vs_others	DLX6-AS1+ neurons
NELL1	NELL1	1.96966	6.16412	168.381	7.44532e-14	9.65208e-12	clusterDLX6-AS1+ neurons_vs_others	DLX6-AS1+ neurons
GPR149	GPR149	3.44099	3.35242	147.277	7.4502e-14	9.65208e-12	clusterDLX6-AS1+ neurons_vs_others	DLX6-AS1+ neurons
GRIN3A	GRIN3A	3.17478	5.53743	260.753	7.6723e-14	9.8678e-12	clusterDLX6-AS1+ neurons_vs_others	DLX6-AS1+ neurons
MIR137HG	MIR137HG	2.55352	7.70869	286.071	8.15698e-14	1.04157e-11	clusterDLX6-AS1+ neurons_vs_others	DLX6-AS1+ neurons
NRG2	NRG2	2.11663	4.45305	137.242	8.59993e-14	1.09029e-11	clusterDLX6-AS1+ neurons_vs_others	DLX6-AS1+ neurons
TUBA1A	TUBA1A	1.144	9.07201	137.011	8.80905e-14	1.10888e-11	clusterDLX6-AS1+ neurons_vs_others	DLX6-AS1+ neurons
RAB6B	RAB6B	1.65067	4.90785	135.157	1.06955e-13	1.33686e-11	clusterDLX6-AS1+ neurons_vs_others	DLX6-AS1+ neurons
AC084361.11	AC084361.1	1.61959	6.74798	144.781	1.13624e-13	1.41029e-11	clusterDLX6-AS1+ neurons_vs_others	DLX6-AS1+ neurons
ATP2B1	ATP2B1	1.05619	7.81869	133.928	1.21789e-13	1.48888e-11	clusterDLX6-AS1+ neurons_vs_others	DLX6-AS1+ neurons
EDARADD	EDARADD	2.49982	4.06774	144.185	1.22472e-13	1.48888e-11	clusterDLX6-AS1+ neurons_vs_others	DLX6-AS1+ neurons
NALCN	NALCN	2.05128	7.47952	214.993	1.2774e-13	1.54235e-11	clusterDLX6-AS1+ neurons_vs_others	DLX6-AS1+ neurons
KCNC2	KCNC2	2.2923	6.00837	132.687	1.38975e-13	1.66667e-11	clusterDLX6-AS1+ neurons_vs_others	DLX6-AS1+ neurons
AC022679.2	AC022679.2	1.91471	4.98098	131.313	1.61046e-13	1.9184e-11	clusterDLX6-AS1+ neurons_vs_others	DLX6-AS1+ neurons
NFASC	NFASC	1.32374	6.70482	131.131	1.64234e-13	1.94333e-11	clusterDLX6-AS1+ neurons_vs_others	DLX6-AS1+ neurons
NAV1	NAV1	1.15933	7.51283	129.807	1.89538e-13	2.22789e-11	clusterDLX6-AS1+ neurons_vs_others	DLX6-AS1+ neurons
RND3	RND3	1.77175	4.08632	129.622	1.93398e-13	2.2583e-11	clusterDLX6-AS1+ neurons_vs_others	DLX6-AS1+ neurons
ATP8A2	ATP8A2	1.19206	8.09104	129.555	1.94817e-13	2.26e-11	clusterDLX6-AS1+ neurons_vs_others	DLX6-AS1+ neurons
CACNA1E	CACNA1E	1.73864	6.68285	131.042	2.11802e-13	2.44109e-11	clusterDLX6-AS1+ neurons_vs_others	DLX6-AS1+ neurons
GRID1	GRID1	2.13915	7.04422	214.586	2.14533e-13	2.45661e-11	clusterDLX6-AS1+ neurons_vs_others	DLX6-AS1+ neurons
SERTAD4	SERTAD4	4.45135	1.36394	136.17	2.18245e-13	2.48309e-11	clusterDLX6-AS1+ neurons_vs_others	DLX6-AS1+ neurons
ABCB1	ABCB1	1.73153	6.56555	150.954	2.73204e-13	3.08859e-11	clusterDLX6-AS1+ neurons_vs_others	DLX6-AS1+ neurons
POMC	POMC	2.44123	6.20462	133.605	2.82585e-13	3.17443e-11	clusterDLX6-AS1+ neurons_vs_others	DLX6-AS1+ neurons
SGSM1	SGSM1	1.20777	6.59551	125.532	3.03507e-13	3.38802e-11	clusterDLX6-AS1+ neurons_vs_others	DLX6-AS1+ neurons
RIMS1	RIMS1	1.13793	8.44793	125.443	3.0652e-13	3.39478e-11	clusterDLX6-AS1+ neurons_vs_others	DLX6-AS1+ neurons
UBE3A	UBE3A	0.950108	9.86769	125.402	3.07938e-13	3.39478e-11	clusterDLX6-AS1+ neurons_vs_others	DLX6-AS1+ neurons
DPYSL3	DPYSL3	1.23609	7.10474	125.171	3.1598e-13	3.46194e-11	clusterDLX6-AS1+ neurons_vs_others	DLX6-AS1+ neurons
CTNNA2	CTNNA2	0.948803	10.5552	124.38	3.45276e-13	3.75969e-11	clusterDLX6-AS1+ neurons_vs_others	DLX6-AS1+ neurons
PGRMC1	PGRMC1	1.42069	6.11283	123.157	3.96366e-13	4.2897e-11	clusterDLX6-AS1+ neurons_vs_others	DLX6-AS1+ neurons
HNRNPK	HNRNPK	1.1141	7.47013	122.865	4.09737e-13	4.40752e-11	clusterDLX6-AS1+ neurons_vs_others	DLX6-AS1+ neurons
SERPINE2	SERPINE2	1.6686	6.33646	137.628	4.62403e-13	4.94409e-11	clusterDLX6-AS1+ neurons_vs_others	DLX6-AS1+ neurons
ROBO1	ROBO1	2.38843	11.1874	262.735	4.96772e-13	5.27976e-11	clusterDLX6-AS1+ neurons_vs_others	DLX6-AS1+ neurons
STXBP5-AS1	STXBP5-AS1	1.37877	7.3449	127.12	5.13102e-13	5.42086e-11	clusterDLX6-AS1+ neurons_vs_others	DLX6-AS1+ neurons
KCNMA1	KCNMA1	1.7038	7.26517	157.035	5.2372e-13	5.5003e-11	clusterDLX6-AS1+ neurons_vs_others	DLX6-AS1+ neurons
KIF21B	KIF21B	1.72493	5.05047	120.551	5.33814e-13	5.57334e-11	clusterDLX6-AS1+ neurons_vs_others	DLX6-AS1+ neurons
DLGAP1-AS5	DLGAP1-AS5	2.18337	6.60684	196.341	5.5873e-13	5.79936e-11	clusterDLX6-AS1+ neurons_vs_others	DLX6-AS1+ neurons
KIAA1549L	KIAA1549L	1.09426	7.02203	119.893	5.7594e-13	5.94323e-11	clusterDLX6-AS1+ neurons_vs_others	DLX6-AS1+ neurons
CPE	CPE	1.0393	7.36344	118.767	6.56375e-13	6.73063e-11	clusterDLX6-AS1+ neurons_vs_others	DLX6-AS1+ neurons
STMN21	STMN2	2.03006	8.91605	201.961	6.59828e-13	6.73063e-11	clusterDLX6-AS1+ neurons_vs_others	DLX6-AS1+ neurons
VAT1	VAT1	2.40081	3.8603	118.422	6.83337e-13	6.9306e-11	clusterDLX6-AS1+ neurons_vs_others	DLX6-AS1+ neurons
AC010941.1	AC010941.1	3.2503	2.70217	125.024	6.90917e-13	6.96766e-11	clusterDLX6-AS1+ neurons_vs_others	DLX6-AS1+ neurons
DYNC1I1	DYNC1I1	1.84555	6.57052	169.438	7.06852e-13	7.08372e-11	clusterDLX6-AS1+ neurons_vs_others	DLX6-AS1+ neurons
ABLIM3	ABLIM3	1.99738	4.8329	118.084	7.10906e-13	7.08372e-11	clusterDLX6-AS1+ neurons_vs_others	DLX6-AS1+ neurons
PPFIA2-AS11	PPFIA2-AS1	1.23836	6.84687	118.042	7.14398e-13	7.08372e-11	clusterDLX6-AS1+ neurons_vs_others	DLX6-AS1+ neurons
AC092832.2	AC092832.2	3.57027	1.93414	117.978	7.19713e-13	7.09677e-11	clusterDLX6-AS1+ neurons_vs_others	DLX6-AS1+ neurons
UCHL1	UCHL1	1.25147	6.81745	118.525	7.42582e-13	7.28182e-11	clusterDLX6-AS1+ neurons_vs_others	DLX6-AS1+ neurons
PAK5	PAK5	1.12344	7.21031	117.41	7.69391e-13	7.50325e-11	clusterDLX6-AS1+ neurons_vs_others	DLX6-AS1+ neurons
TUBB3	TUBB3	1.72221	7.73542	166.425	7.92946e-13	7.69071e-11	clusterDLX6-AS1+ neurons_vs_others	DLX6-AS1+ neurons
ITGBL1	ITGBL1	3.04899	3.47547	123.178	8.42773e-13	8.12956e-11	clusterDLX6-AS1+ neurons_vs_others	DLX6-AS1+ neurons
CELF5	CELF5	1.08414	7.22904	115.462	9.68819e-13	9.2949e-11	clusterDLX6-AS1+ neurons_vs_others	DLX6-AS1+ neurons
SOX41	SOX4	0.908787	7.46988	114.363	1.10487e-12	1.05432e-10	clusterDLX6-AS1+ neurons_vs_others	DLX6-AS1+ neurons
ANK3	ANK3	1.66987	9.70511	167.792	1.24277e-12	1.17957e-10	clusterDLX6-AS1+ neurons_vs_others	DLX6-AS1+ neurons
LINC02197	LINC02197	5.52515	3.5435	248.832	1.25683e-12	1.18657e-10	clusterDLX6-AS1+ neurons_vs_others	DLX6-AS1+ neurons
DNAJC12	DNAJC12	2.91444	3.82154	119.055	1.32504e-12	1.23779e-10	clusterDLX6-AS1+ neurons_vs_others	DLX6-AS1+ neurons
AC069228.11	AC069228.1	1.16823	8.45053	113.364	1.36927e-12	1.27242e-10	clusterDLX6-AS1+ neurons_vs_others	DLX6-AS1+ neurons
SNHG14	SNHG14	0.878032	11.5077	112.509	1.38201e-12	1.27757e-10	clusterDLX6-AS1+ neurons_vs_others	DLX6-AS1+ neurons
SLC6A17	SLC6A17	2.95228	3.80877	117.562	1.56555e-12	1.43974e-10	clusterDLX6-AS1+ neurons_vs_others	DLX6-AS1+ neurons
NRXN1	NRXN1	1.05215	10.3576	111.431	1.57606e-12	1.44194e-10	clusterDLX6-AS1+ neurons_vs_others	DLX6-AS1+ neurons
PPFIA21	PPFIA2	1.0504	8.50393	111.323	1.59707e-12	1.44902e-10	clusterDLX6-AS1+ neurons_vs_others	DLX6-AS1+ neurons
AUXG01000058.1	AUXG01000058.1	0.965843	9.4722	111.268	1.60792e-12	1.44902e-10	clusterDLX6-AS1+ neurons_vs_others	DLX6-AS1+ neurons
PHYHIPL	PHYHIPL	0.908547	7.46143	111.266	1.6083e-12	1.44902e-10	clusterDLX6-AS1+ neurons_vs_others	DLX6-AS1+ neurons
FGF14	FGF14	1.64494	8.64422	158.528	1.62003e-12	1.45221e-10	clusterDLX6-AS1+ neurons_vs_others	DLX6-AS1+ neurons
AC011369.1	AC011369.1	1.30972	6.72569	118.454	1.72054e-12	1.52689e-10	clusterDLX6-AS1+ neurons_vs_others	DLX6-AS1+ neurons
CLSTN2	CLSTN2	3.49079	9.10624	328.944	1.86835e-12	1.64212e-10	clusterDLX6-AS1+ neurons_vs_others	DLX6-AS1+ neurons
KIF1A	KIF1A	1.07184	6.75264	110.046	1.86888e-12	1.64212e-10	clusterDLX6-AS1+ neurons_vs_others	DLX6-AS1+ neurons
TH	TH	3.63512	3.79479	122.692	1.96216e-12	1.71559e-10	clusterDLX6-AS1+ neurons_vs_others	DLX6-AS1+ neurons
NOVA1	NOVA1	1.03759	9.54382	109.525	1.99328e-12	1.73425e-10	clusterDLX6-AS1+ neurons_vs_others	DLX6-AS1+ neurons
GPR137C	GPR137C	1.17765	7.38762	113.985	2.14299e-12	1.85541e-10	clusterDLX6-AS1+ neurons_vs_others	DLX6-AS1+ neurons
LRRTM3	LRRTM3	3.21506	3.16977	114.039	2.33667e-12	2.00531e-10	clusterDLX6-AS1+ neurons_vs_others	DLX6-AS1+ neurons
RTN1	RTN1	0.849378	8.48841	108.242	2.33871e-12	2.00531e-10	clusterDLX6-AS1+ neurons_vs_others	DLX6-AS1+ neurons
CPNE7	CPNE7	3.33117	3.55632	120.429	2.48429e-12	2.11989e-10	clusterDLX6-AS1+ neurons_vs_others	DLX6-AS1+ neurons
SCG2	SCG2	3.96203	7.52043	269.737	2.82371e-12	2.39799e-10	clusterDLX6-AS1+ neurons_vs_others	DLX6-AS1+ neurons
MYT1L1	MYT1L	4.00573	7.72063	1026.96	6.48087e-28	7.90545e-24	clusterNR5A2/ONECUT1/3+ neurons_vs_others	NR5A2/ONECUT1/3+ neurons
NEFM	NEFM	4.94153	4.70194	1008.22	8.90805e-28	7.90545e-24	clusterNR5A2/ONECUT1/3+ neurons_vs_others	NR5A2/ONECUT1/3+ neurons
SYN3	SYN3	3.0893	6.90534	936.417	4.41029e-27	2.60928e-23	clusterNR5A2/ONECUT1/3+ neurons_vs_others	NR5A2/ONECUT1/3+ neurons
CACNA1E1	CACNA1E	3.84481	6.68285	910.053	1.08584e-26	4.81815e-23	clusterNR5A2/ONECUT1/3+ neurons_vs_others	NR5A2/ONECUT1/3+ neurons
PPP1R1C	PPP1R1C	3.52907	5.37752	840.415	2.04392e-26	7.25552e-23	clusterNR5A2/ONECUT1/3+ neurons_vs_others	NR5A2/ONECUT1/3+ neurons
FRMD3	FRMD3	2.68268	6.71975	784.204	6.68985e-26	1.97897e-22	clusterNR5A2/ONECUT1/3+ neurons_vs_others	NR5A2/ONECUT1/3+ neurons
MIR124-2HG	MIR124-2HG	4.25284	4.77141	746.887	1.53884e-25	3.90184e-22	clusterNR5A2/ONECUT1/3+ neurons_vs_others	NR5A2/ONECUT1/3+ neurons
NEFL	NEFL	6.2706	4.60737	852.161	2.86857e-25	6.36428e-22	clusterNR5A2/ONECUT1/3+ neurons_vs_others	NR5A2/ONECUT1/3+ neurons
KCNC21	KCNC2	4.47157	6.00837	695.793	5.14748e-25	1.01514e-21	clusterNR5A2/ONECUT1/3+ neurons_vs_others	NR5A2/ONECUT1/3+ neurons
LINC01470	LINC01470	3.4845	5.02026	686.565	6.45964e-25	1.12308e-21	clusterNR5A2/ONECUT1/3+ neurons_vs_others	NR5A2/ONECUT1/3+ neurons
TUBB2A1	TUBB2A	3.83769	6.56411	683.557	6.9603e-25	1.12308e-21	clusterNR5A2/ONECUT1/3+ neurons_vs_others	NR5A2/ONECUT1/3+ neurons
PDE4B	PDE4B	2.95993	8.47908	876.504	8.20857e-25	1.17495e-21	clusterNR5A2/ONECUT1/3+ neurons_vs_others	NR5A2/ONECUT1/3+ neurons
THSD7A	THSD7A	3.42565	7.19027	944.981	8.60573e-25	1.17495e-21	clusterNR5A2/ONECUT1/3+ neurons_vs_others	NR5A2/ONECUT1/3+ neurons
SHC4	SHC4	3.35569	5.81174	647.118	1.76393e-24	2.23629e-21	clusterNR5A2/ONECUT1/3+ neurons_vs_others	NR5A2/ONECUT1/3+ neurons
ADAMTS5	ADAMTS5	3.85893	5.05766	636.838	2.31374e-24	2.73777e-21	clusterNR5A2/ONECUT1/3+ neurons_vs_others	NR5A2/ONECUT1/3+ neurons
LINC01630	LINC01630	4.57164	4.04146	633.051	2.55968e-24	2.83948e-21	clusterNR5A2/ONECUT1/3+ neurons_vs_others	NR5A2/ONECUT1/3+ neurons
HECW11	HECW1	3.13681	6.42561	624.718	3.20326e-24	3.3444e-21	clusterNR5A2/ONECUT1/3+ neurons_vs_others	NR5A2/ONECUT1/3+ neurons
SCN9A	SCN9A	2.5433	7.92099	619.052	3.73707e-24	3.68495e-21	clusterNR5A2/ONECUT1/3+ neurons_vs_others	NR5A2/ONECUT1/3+ neurons
ISL12	ISL1	3.1519	7.32989	616.897	3.96408e-24	3.70308e-21	clusterNR5A2/ONECUT1/3+ neurons_vs_others	NR5A2/ONECUT1/3+ neurons
SCG31	SCG3	3.53387	6.54989	613.715	4.32625e-24	3.83933e-21	clusterNR5A2/ONECUT1/3+ neurons_vs_others	NR5A2/ONECUT1/3+ neurons
ATP8A21	ATP8A2	2.43611	8.09104	603.124	5.80561e-24	4.90685e-21	clusterNR5A2/ONECUT1/3+ neurons_vs_others	NR5A2/ONECUT1/3+ neurons
PTPRN1	PTPRN	4.5026	6.49945	655.319	1.12545e-23	8.84449e-21	clusterNR5A2/ONECUT1/3+ neurons_vs_others	NR5A2/ONECUT1/3+ neurons
AC022433.1	AC022433.1	4.69481	7.53761	1283.86	1.14611e-23	8.84449e-21	clusterNR5A2/ONECUT1/3+ neurons_vs_others	NR5A2/ONECUT1/3+ neurons
DSCAM1	DSCAM	3.8978	8.90315	1027.01	1.24278e-23	9.19086e-21	clusterNR5A2/ONECUT1/3+ neurons_vs_others	NR5A2/ONECUT1/3+ neurons
DOCK5	DOCK5	3.51917	6.28639	793.759	1.74046e-23	1.23566e-20	clusterNR5A2/ONECUT1/3+ neurons_vs_others	NR5A2/ONECUT1/3+ neurons
ADGRG2	ADGRG2	4.29896	4.0893	531.391	4.88977e-23	3.30412e-20	clusterNR5A2/ONECUT1/3+ neurons_vs_others	NR5A2/ONECUT1/3+ neurons
PRKCE	PRKCE	2.46134	7.36875	542.62	5.08371e-23	3.30412e-20	clusterNR5A2/ONECUT1/3+ neurons_vs_others	NR5A2/ONECUT1/3+ neurons
SYNE1	SYNE1	1.88477	7.6819	529.37	5.21243e-23	3.30412e-20	clusterNR5A2/ONECUT1/3+ neurons_vs_others	NR5A2/ONECUT1/3+ neurons
GRIA22	GRIA2	2.11688	8.49309	527.77	5.48364e-23	3.35618e-20	clusterNR5A2/ONECUT1/3+ neurons_vs_others	NR5A2/ONECUT1/3+ neurons
FRMPD4	FRMPD4	3.98514	6.2135	862.893	8.4549e-23	5.0022e-20	clusterNR5A2/ONECUT1/3+ neurons_vs_others	NR5A2/ONECUT1/3+ neurons
IL18R1	IL18R1	5.55774	3.57294	494.642	1.62156e-22	9.14308e-20	clusterNR5A2/ONECUT1/3+ neurons_vs_others	NR5A2/ONECUT1/3+ neurons
XKR41	XKR4	2.5747	8.71266	567.277	1.64842e-22	9.14308e-20	clusterNR5A2/ONECUT1/3+ neurons_vs_others	NR5A2/ONECUT1/3+ neurons
UBE3A1	UBE3A	1.77499	9.86769	485.453	2.21701e-22	1.19242e-19	clusterNR5A2/ONECUT1/3+ neurons_vs_others	NR5A2/ONECUT1/3+ neurons
TMEM59L1	TMEM59L	3.04902	6.69364	464.414	4.63482e-22	2.41951e-19	clusterNR5A2/ONECUT1/3+ neurons_vs_others	NR5A2/ONECUT1/3+ neurons
AC077690.1	AC077690.1	3.05196	6.20577	518.18	5.64357e-22	2.86193e-19	clusterNR5A2/ONECUT1/3+ neurons_vs_others	NR5A2/ONECUT1/3+ neurons
PCA3	PCA3	3.08139	6.01162	446.491	8.90671e-22	4.39126e-19	clusterNR5A2/ONECUT1/3+ neurons_vs_others	NR5A2/ONECUT1/3+ neurons
AC104803.1	AC104803.1	4.42404	4.28609	491.102	1.12257e-21	5.385e-19	clusterNR5A2/ONECUT1/3+ neurons_vs_others	NR5A2/ONECUT1/3+ neurons
PRUNE2	PRUNE2	2.18407	6.72986	428.687	1.74649e-21	8.15748e-19	clusterNR5A2/ONECUT1/3+ neurons_vs_others	NR5A2/ONECUT1/3+ neurons
SCG51	SCG5	2.9504	6.59949	432.72	2.01494e-21	9.17005e-19	clusterNR5A2/ONECUT1/3+ neurons_vs_others	NR5A2/ONECUT1/3+ neurons
AC016650.11	AC016650.1	5.53097	5.32082	725.876	2.21941e-21	9.84809e-19	clusterNR5A2/ONECUT1/3+ neurons_vs_others	NR5A2/ONECUT1/3+ neurons
CHGB1	CHGB	4.29071	6.36674	469.452	2.2764e-21	9.8546e-19	clusterNR5A2/ONECUT1/3+ neurons_vs_others	NR5A2/ONECUT1/3+ neurons
TMEM117	TMEM117	2.30711	6.25191	420.709	2.38166e-21	1.00648e-18	clusterNR5A2/ONECUT1/3+ neurons_vs_others	NR5A2/ONECUT1/3+ neurons
PLD5	PLD5	2.43922	7.31698	472.292	2.48339e-21	1.02506e-18	clusterNR5A2/ONECUT1/3+ neurons_vs_others	NR5A2/ONECUT1/3+ neurons
AP003025.2	AP003025.2	6.44373	2.75814	522.077	2.88698e-21	1.16457e-18	clusterNR5A2/ONECUT1/3+ neurons_vs_others	NR5A2/ONECUT1/3+ neurons
CELF41	CELF4	1.96471	7.99406	409.578	3.70531e-21	1.46146e-18	clusterNR5A2/ONECUT1/3+ neurons_vs_others	NR5A2/ONECUT1/3+ neurons
VAT1L1	VAT1L	2.41213	8.43391	483.15	4.42959e-21	1.70915e-18	clusterNR5A2/ONECUT1/3+ neurons_vs_others	NR5A2/ONECUT1/3+ neurons
CHD5	CHD5	2.94327	5.36126	402.723	4.89149e-21	1.84721e-18	clusterNR5A2/ONECUT1/3+ neurons_vs_others	NR5A2/ONECUT1/3+ neurons
AC061961.1	AC061961.1	4.68651	4.79026	439.469	6.4279e-21	2.37685e-18	clusterNR5A2/ONECUT1/3+ neurons_vs_others	NR5A2/ONECUT1/3+ neurons
FRY	FRY	1.97988	8.21307	394.874	6.75921e-21	2.44835e-18	clusterNR5A2/ONECUT1/3+ neurons_vs_others	NR5A2/ONECUT1/3+ neurons
THSD7B	THSD7B	2.56611	5.87272	387.321	9.27917e-21	3.29229e-18	clusterNR5A2/ONECUT1/3+ neurons_vs_others	NR5A2/ONECUT1/3+ neurons
PLCB1	PLCB1	3.12277	7.30893	711.826	9.46007e-21	3.29229e-18	clusterNR5A2/ONECUT1/3+ neurons_vs_others	NR5A2/ONECUT1/3+ neurons
SCN2A1	SCN2A	2.49841	6.98268	385.38	1.00754e-20	3.37484e-18	clusterNR5A2/ONECUT1/3+ neurons_vs_others	NR5A2/ONECUT1/3+ neurons
PMFBP1	PMFBP1	3.96344	4.10362	385.375	1.00776e-20	3.37484e-18	clusterNR5A2/ONECUT1/3+ neurons_vs_others	NR5A2/ONECUT1/3+ neurons
CEP85L	CEP85L	2.04856	7.07637	373.391	1.68993e-20	5.55456e-18	clusterNR5A2/ONECUT1/3+ neurons_vs_others	NR5A2/ONECUT1/3+ neurons
LINC00200	LINC00200	3.75512	4.42385	427.325	1.80068e-20	5.81097e-18	clusterNR5A2/ONECUT1/3+ neurons_vs_others	NR5A2/ONECUT1/3+ neurons
RIMS11	RIMS1	1.91003	8.44793	370.554	1.91417e-20	6.06689e-18	clusterNR5A2/ONECUT1/3+ neurons_vs_others	NR5A2/ONECUT1/3+ neurons
AC008662.1	AC008662.1	7.76943	2.07692	451.858	2.49012e-20	7.75389e-18	clusterNR5A2/ONECUT1/3+ neurons_vs_others	NR5A2/ONECUT1/3+ neurons
SYP1	SYP	2.36308	6.51079	348.937	5.09578e-20	1.53297e-17	clusterNR5A2/ONECUT1/3+ neurons_vs_others	NR5A2/ONECUT1/3+ neurons
ATP1A31	ATP1A3	3.02663	6.23528	344.489	6.27603e-20	1.85655e-17	clusterNR5A2/ONECUT1/3+ neurons_vs_others	NR5A2/ONECUT1/3+ neurons
ONECUT3	ONECUT3	7.0546	2.48247	444.187	7.78692e-20	2.26574e-17	clusterNR5A2/ONECUT1/3+ neurons_vs_others	NR5A2/ONECUT1/3+ neurons
AC008571.2	AC008571.2	3.7433	3.11618	337.59	8.71217e-20	2.45448e-17	clusterNR5A2/ONECUT1/3+ neurons_vs_others	NR5A2/ONECUT1/3+ neurons
MARCH111	MARCH11	4.60857	4.81576	467.825	1.03343e-19	2.866e-17	clusterNR5A2/ONECUT1/3+ neurons_vs_others	NR5A2/ONECUT1/3+ neurons
AC096576.3	AC096576.3	4.29548	3.29457	328.31	1.36753e-19	3.73421e-17	clusterNR5A2/ONECUT1/3+ neurons_vs_others	NR5A2/ONECUT1/3+ neurons
NDST3	NDST3	2.7008	4.8793	326.121	1.52353e-19	4.09715e-17	clusterNR5A2/ONECUT1/3+ neurons_vs_others	NR5A2/ONECUT1/3+ neurons
ARHGAP22	ARHGAP22	2.88794	4.94766	319.034	2.17138e-19	5.7522e-17	clusterNR5A2/ONECUT1/3+ neurons_vs_others	NR5A2/ONECUT1/3+ neurons
RGS71	RGS7	2.50489	8.06806	430.684	2.49536e-19	6.51327e-17	clusterNR5A2/ONECUT1/3+ neurons_vs_others	NR5A2/ONECUT1/3+ neurons
MAPT1	MAPT	2.13196	7.40635	306.288	4.18248e-19	1.07587e-16	clusterNR5A2/ONECUT1/3+ neurons_vs_others	NR5A2/ONECUT1/3+ neurons
CHGA	CHGA	4.74404	4.12634	328.782	5.80976e-19	1.47311e-16	clusterNR5A2/ONECUT1/3+ neurons_vs_others	NR5A2/ONECUT1/3+ neurons
NTM-AS1	NTM-AS1	5.41015	1.9521	299.342	6.04058e-19	1.51006e-16	clusterNR5A2/ONECUT1/3+ neurons_vs_others	NR5A2/ONECUT1/3+ neurons
GRIA1	GRIA1	2.67843	7.74013	506.323	6.22291e-19	1.53403e-16	clusterNR5A2/ONECUT1/3+ neurons_vs_others	NR5A2/ONECUT1/3+ neurons
NSG21	NSG2	4.37489	4.42047	319.603	8.96392e-19	2.15115e-16	clusterNR5A2/ONECUT1/3+ neurons_vs_others	NR5A2/ONECUT1/3+ neurons
MAP1LC3A1	MAP1LC3A	1.76083	6.82994	292.033	8.96866e-19	2.15115e-16	clusterNR5A2/ONECUT1/3+ neurons_vs_others	NR5A2/ONECUT1/3+ neurons
RNF217-AS1	RNF217-AS1	3.29303	6.318	541.943	1.14945e-18	2.72021e-16	clusterNR5A2/ONECUT1/3+ neurons_vs_others	NR5A2/ONECUT1/3+ neurons
AP003025.1	AP003025.1	6.19907	2.4218	339.48	1.24119e-18	2.87781e-16	clusterNR5A2/ONECUT1/3+ neurons_vs_others	NR5A2/ONECUT1/3+ neurons
AC021351.1	AC021351.1	4.13611	3.03135	286.038	1.24847e-18	2.87781e-16	clusterNR5A2/ONECUT1/3+ neurons_vs_others	NR5A2/ONECUT1/3+ neurons
ATP1B11	ATP1B1	1.84069	6.56599	285.081	1.31691e-18	2.96487e-16	clusterNR5A2/ONECUT1/3+ neurons_vs_others	NR5A2/ONECUT1/3+ neurons
NRXN11	NRXN1	1.62579	10.3576	285.044	1.31965e-18	2.96487e-16	clusterNR5A2/ONECUT1/3+ neurons_vs_others	NR5A2/ONECUT1/3+ neurons
CTNNA21	CTNNA2	1.39807	10.5552	284.658	1.34845e-18	2.9917e-16	clusterNR5A2/ONECUT1/3+ neurons_vs_others	NR5A2/ONECUT1/3+ neurons
L1CAM2	L1CAM	2.94646	5.76138	282.437	1.52751e-18	3.34712e-16	clusterNR5A2/ONECUT1/3+ neurons_vs_others	NR5A2/ONECUT1/3+ neurons
MAML3	MAML3	1.50334	9.53427	280.869	1.6689e-18	3.59229e-16	clusterNR5A2/ONECUT1/3+ neurons_vs_others	NR5A2/ONECUT1/3+ neurons
NELL11	NELL1	3.00151	6.16412	373.177	1.67987e-18	3.59229e-16	clusterNR5A2/ONECUT1/3+ neurons_vs_others	NR5A2/ONECUT1/3+ neurons
ANK11	ANK1	2.81956	5.53916	279.973	1.75585e-18	3.69726e-16	clusterNR5A2/ONECUT1/3+ neurons_vs_others	NR5A2/ONECUT1/3+ neurons
CHRM3	CHRM3	3.14778	5.11827	363.976	1.77062e-18	3.69726e-16	clusterNR5A2/ONECUT1/3+ neurons_vs_others	NR5A2/ONECUT1/3+ neurons
TRIM67	TRIM67	4.73756	3.9018	329.872	2.53236e-18	5.11122e-16	clusterNR5A2/ONECUT1/3+ neurons_vs_others	NR5A2/ONECUT1/3+ neurons
SOBP	SOBP	1.76384	7.69625	277.621	2.53415e-18	5.11122e-16	clusterNR5A2/ONECUT1/3+ neurons_vs_others	NR5A2/ONECUT1/3+ neurons
MTUS2	MTUS2	2.42999	5.17396	272.606	2.68087e-18	5.34637e-16	clusterNR5A2/ONECUT1/3+ neurons_vs_others	NR5A2/ONECUT1/3+ neurons
ASTN2	ASTN2	1.61394	7.65639	272.218	2.74207e-18	5.40766e-16	clusterNR5A2/ONECUT1/3+ neurons_vs_others	NR5A2/ONECUT1/3+ neurons
UTS2	UTS2	8.23811	5.83686	1306.43	2.98115e-18	5.81103e-16	clusterNR5A2/ONECUT1/3+ neurons_vs_others	NR5A2/ONECUT1/3+ neurons
DIRAS2	DIRAS2	3.084	4.56427	270.608	3.01208e-18	5.81103e-16	clusterNR5A2/ONECUT1/3+ neurons_vs_others	NR5A2/ONECUT1/3+ neurons
INA1	INA	3.61112	5.54666	294.263	3.15594e-18	6.02309e-16	clusterNR5A2/ONECUT1/3+ neurons_vs_others	NR5A2/ONECUT1/3+ neurons
SRRM42	SRRM4	2.14061	7.86782	306.654	3.34001e-18	6.30657e-16	clusterNR5A2/ONECUT1/3+ neurons_vs_others	NR5A2/ONECUT1/3+ neurons
TTLL7	TTLL7	1.4476	7.58956	267.466	3.6235e-18	6.76984e-16	clusterNR5A2/ONECUT1/3+ neurons_vs_others	NR5A2/ONECUT1/3+ neurons
CHST8	CHST8	4.72034	3.30406	291.095	3.71904e-18	6.87597e-16	clusterNR5A2/ONECUT1/3+ neurons_vs_others	NR5A2/ONECUT1/3+ neurons
AC091860.2	AC091860.2	5.32154	2.55224	290.152	3.90662e-18	7.14831e-16	clusterNR5A2/ONECUT1/3+ neurons_vs_others	NR5A2/ONECUT1/3+ neurons
GRM7-AS1	GRM7-AS1	3.47716	4.11641	265.19	4.14737e-18	7.5114e-16	clusterNR5A2/ONECUT1/3+ neurons_vs_others	NR5A2/ONECUT1/3+ neurons
ASIC2	ASIC2	4.42077	5.96296	632.393	4.48561e-18	8.04194e-16	clusterNR5A2/ONECUT1/3+ neurons_vs_others	NR5A2/ONECUT1/3+ neurons
CNTNAP3	CNTNAP3	3.2017	4.88703	296.716	5.19907e-18	9.22784e-16	clusterNR5A2/ONECUT1/3+ neurons_vs_others	NR5A2/ONECUT1/3+ neurons
SGCZ1	SGCZ	2.7084	7.84583	392.566	5.30895e-18	9.32955e-16	clusterNR5A2/ONECUT1/3+ neurons_vs_others	NR5A2/ONECUT1/3+ neurons
AC068051.1	AC068051.1	1.65601	7.26183	260.057	5.64568e-18	9.82403e-16	clusterNR5A2/ONECUT1/3+ neurons_vs_others	NR5A2/ONECUT1/3+ neurons
CHRM3-AS2	CHRM3-AS2	4.18005	3.90407	320.768	5.88815e-18	1.01296e-15	clusterNR5A2/ONECUT1/3+ neurons_vs_others	NR5A2/ONECUT1/3+ neurons
LINC01938	LINC01938	5.00683	2.12004	259.233	5.93544e-18	1.01296e-15	clusterNR5A2/ONECUT1/3+ neurons_vs_others	NR5A2/ONECUT1/3+ neurons
CD24	CD24	3.64159	4.46662	259.063	5.99695e-18	1.01371e-15	clusterNR5A2/ONECUT1/3+ neurons_vs_others	NR5A2/ONECUT1/3+ neurons
SNCG	SNCG	4.56857	3.83488	281.014	6.33956e-18	1.06152e-15	clusterNR5A2/ONECUT1/3+ neurons_vs_others	NR5A2/ONECUT1/3+ neurons
ZBTB7C	ZBTB7C	3.17392	5.91563	416.421	7.18477e-18	1.1918e-15	clusterNR5A2/ONECUT1/3+ neurons_vs_others	NR5A2/ONECUT1/3+ neurons
FGF13	FGF13	1.60087	8.2559	255.875	7.28746e-18	1.19764e-15	clusterNR5A2/ONECUT1/3+ neurons_vs_others	NR5A2/ONECUT1/3+ neurons
ATP6V0B	ATP6V0B	2.70147	4.73608	252.358	9.05851e-18	1.46163e-15	clusterNR5A2/ONECUT1/3+ neurons_vs_others	NR5A2/ONECUT1/3+ neurons
SLC24A2	SLC24A2	3.19973	3.92486	252.048	9.23516e-18	1.47671e-15	clusterNR5A2/ONECUT1/3+ neurons_vs_others	NR5A2/ONECUT1/3+ neurons
AL160254.1	AL160254.1	2.28037	6.29753	297.191	9.48796e-18	1.50359e-15	clusterNR5A2/ONECUT1/3+ neurons_vs_others	NR5A2/ONECUT1/3+ neurons
ABLIM31	ABLIM3	3.03554	4.8329	251.434	9.59572e-18	1.50721e-15	clusterNR5A2/ONECUT1/3+ neurons_vs_others	NR5A2/ONECUT1/3+ neurons
TUSC7	TUSC7	4.69416	3.49034	285.164	1.0085e-17	1.57016e-15	clusterNR5A2/ONECUT1/3+ neurons_vs_others	NR5A2/ONECUT1/3+ neurons
AC008056.11	AC008056.1	1.8924	8.38635	280.095	1.04957e-17	1.61989e-15	clusterNR5A2/ONECUT1/3+ neurons_vs_others	NR5A2/ONECUT1/3+ neurons
TMOD1	TMOD1	3.07046	4.49426	249.604	1.07608e-17	1.64649e-15	clusterNR5A2/ONECUT1/3+ neurons_vs_others	NR5A2/ONECUT1/3+ neurons
LINC00290	LINC00290	3.71354	5.64548	471.533	1.19292e-17	1.80968e-15	clusterNR5A2/ONECUT1/3+ neurons_vs_others	NR5A2/ONECUT1/3+ neurons
CHRM2	CHRM2	5.46541	4.16915	480.869	1.25804e-17	1.89228e-15	clusterNR5A2/ONECUT1/3+ neurons_vs_others	NR5A2/ONECUT1/3+ neurons
AL732509.1	AL732509.1	4.80591	3.45089	357.127	1.26948e-17	1.89344e-15	clusterNR5A2/ONECUT1/3+ neurons_vs_others	NR5A2/ONECUT1/3+ neurons
CRNDE	CRNDE	3.46952	4.88046	380.898	1.45539e-17	2.15265e-15	clusterNR5A2/ONECUT1/3+ neurons_vs_others	NR5A2/ONECUT1/3+ neurons
GALNT13	GALNT13	2.89446	7.02102	463.751	1.65032e-17	2.42079e-15	clusterNR5A2/ONECUT1/3+ neurons_vs_others	NR5A2/ONECUT1/3+ neurons
SYT52	SYT5	3.3847	5.86836	262.84	1.73426e-17	2.52306e-15	clusterNR5A2/ONECUT1/3+ neurons_vs_others	NR5A2/ONECUT1/3+ neurons
EDIL3	EDIL3	3.1774	5.9233	411.412	1.79952e-17	2.59672e-15	clusterNR5A2/ONECUT1/3+ neurons_vs_others	NR5A2/ONECUT1/3+ neurons
RTN11	RTN1	1.27052	8.48841	239.015	2.11996e-17	3.03445e-15	clusterNR5A2/ONECUT1/3+ neurons_vs_others	NR5A2/ONECUT1/3+ neurons
ARPP21	ARPP21	3.4578	3.87895	241.471	2.42814e-17	3.44776e-15	clusterNR5A2/ONECUT1/3+ neurons_vs_others	NR5A2/ONECUT1/3+ neurons
ATP6V0C	ATP6V0C	3.25115	4.27913	231.628	3.4562e-17	4.86858e-15	clusterNR5A2/ONECUT1/3+ neurons_vs_others	NR5A2/ONECUT1/3+ neurons
SH3KBP1	SH3KBP1	2.02456	5.60726	231.207	3.5554e-17	4.96888e-15	clusterNR5A2/ONECUT1/3+ neurons_vs_others	NR5A2/ONECUT1/3+ neurons
UBASH3B	UBASH3B	2.5911	4.94856	231.063	3.58982e-17	4.9778e-15	clusterNR5A2/ONECUT1/3+ neurons_vs_others	NR5A2/ONECUT1/3+ neurons
TNR	TNR	4.53073	5.84646	432.595	3.64753e-17	5.0186e-15	clusterNR5A2/ONECUT1/3+ neurons_vs_others	NR5A2/ONECUT1/3+ neurons
DLGAP21	DLGAP2	3.15439	8.4938	499.958	3.93555e-17	5.37324e-15	clusterNR5A2/ONECUT1/3+ neurons_vs_others	NR5A2/ONECUT1/3+ neurons
LINC012011	LINC01201	5.37192	4.25663	282.585	3.96685e-17	5.37463e-15	clusterNR5A2/ONECUT1/3+ neurons_vs_others	NR5A2/ONECUT1/3+ neurons
AP001599.1	AP001599.1	4.02524	4.59431	357.839	4.83345e-17	6.49916e-15	clusterNR5A2/ONECUT1/3+ neurons_vs_others	NR5A2/ONECUT1/3+ neurons
PTPRO1	PTPRO	1.49107	7.90482	225.784	5.13736e-17	6.85586e-15	clusterNR5A2/ONECUT1/3+ neurons_vs_others	NR5A2/ONECUT1/3+ neurons
AP001605.1	AP001605.1	3.78166	4.94923	243.376	5.47063e-17	7.24614e-15	clusterNR5A2/ONECUT1/3+ neurons_vs_others	NR5A2/ONECUT1/3+ neurons
LINC02143	LINC02143	5.54643	4.14103	421.322	5.57148e-17	7.32506e-15	clusterNR5A2/ONECUT1/3+ neurons_vs_others	NR5A2/ONECUT1/3+ neurons
GPRIN3	GPRIN3	3.52843	3.19523	223.865	5.86303e-17	7.65168e-15	clusterNR5A2/ONECUT1/3+ neurons_vs_others	NR5A2/ONECUT1/3+ neurons
SPOCK2	SPOCK2	3.95026	4.41233	240.042	6.71492e-17	8.6995e-15	clusterNR5A2/ONECUT1/3+ neurons_vs_others	NR5A2/ONECUT1/3+ neurons
AL590783.1	AL590783.1	4.02544	2.49258	220.283	7.5224e-17	9.64424e-15	clusterNR5A2/ONECUT1/3+ neurons_vs_others	NR5A2/ONECUT1/3+ neurons
ACSL6	ACSL6	3.25851	4.05107	220.226	7.55282e-17	9.64424e-15	clusterNR5A2/ONECUT1/3+ neurons_vs_others	NR5A2/ONECUT1/3+ neurons
HS3ST4	HS3ST4	2.27041	6.4362	260.196	8.2286e-17	1.04321e-14	clusterNR5A2/ONECUT1/3+ neurons_vs_others	NR5A2/ONECUT1/3+ neurons
ZDHHC14	ZDHHC14	2.01614	6.36388	241.935	9.00071e-17	1.133e-14	clusterNR5A2/ONECUT1/3+ neurons_vs_others	NR5A2/ONECUT1/3+ neurons
LHFPL3	LHFPL3	2.49163	6.1932	306.676	9.59433e-17	1.19922e-14	clusterNR5A2/ONECUT1/3+ neurons_vs_others	NR5A2/ONECUT1/3+ neurons
RUNDC3B1	RUNDC3B	2.04343	7.1204	241.189	9.68907e-17	1.2026e-14	clusterNR5A2/ONECUT1/3+ neurons_vs_others	NR5A2/ONECUT1/3+ neurons
GABRA2	GABRA2	2.66701	5.97813	248.225	9.96036e-17	1.22768e-14	clusterNR5A2/ONECUT1/3+ neurons_vs_others	NR5A2/ONECUT1/3+ neurons
ADGRL4	ADGRL4	3.46908	3.79026	217.549	1.09521e-16	1.34061e-14	clusterNR5A2/ONECUT1/3+ neurons_vs_others	NR5A2/ONECUT1/3+ neurons
SGCD	SGCD	2.38159	7.74433	347.989	1.11897e-16	1.36031e-14	clusterNR5A2/ONECUT1/3+ neurons_vs_others	NR5A2/ONECUT1/3+ neurons
IQSEC32	IQSEC3	3.06928	5.83217	230.271	1.24234e-16	1.50002e-14	clusterNR5A2/ONECUT1/3+ neurons_vs_others	NR5A2/ONECUT1/3+ neurons
NPM2	NPM2	3.64118	5.22243	228.816	1.36417e-16	1.63009e-14	clusterNR5A2/ONECUT1/3+ neurons_vs_others	NR5A2/ONECUT1/3+ neurons
SNHG141	SNHG14	1.18052	11.5077	211.885	1.36843e-16	1.63009e-14	clusterNR5A2/ONECUT1/3+ neurons_vs_others	NR5A2/ONECUT1/3+ neurons
AC093305.1	AC093305.1	4.05575	2.59649	211.493	1.40784e-16	1.66079e-14	clusterNR5A2/ONECUT1/3+ neurons_vs_others	NR5A2/ONECUT1/3+ neurons
AC091885.2	AC091885.2	2.34616	5.85279	254.903	1.41292e-16	1.66079e-14	clusterNR5A2/ONECUT1/3+ neurons_vs_others	NR5A2/ONECUT1/3+ neurons
PTPRE	PTPRE	2.0391	5.74093	210.933	1.46638e-16	1.71229e-14	clusterNR5A2/ONECUT1/3+ neurons_vs_others	NR5A2/ONECUT1/3+ neurons
ADGRB3	ADGRB3	1.47541	10.0722	210.102	1.5579e-16	1.79553e-14	clusterNR5A2/ONECUT1/3+ neurons_vs_others	NR5A2/ONECUT1/3+ neurons
KIF5C1	KIF5C	1.40299	8.35377	209.383	1.64187e-16	1.8801e-14	clusterNR5A2/ONECUT1/3+ neurons_vs_others	NR5A2/ONECUT1/3+ neurons
ARFGEF3	ARFGEF3	3.1398	8.00832	504.694	1.78022e-16	2.02522e-14	clusterNR5A2/ONECUT1/3+ neurons_vs_others	NR5A2/ONECUT1/3+ neurons
POU6F2	POU6F2	2.52245	6.87729	341.157	1.79142e-16	2.02522e-14	clusterNR5A2/ONECUT1/3+ neurons_vs_others	NR5A2/ONECUT1/3+ neurons
AC023905.1	AC023905.1	2.34968	6.26117	271.832	1.83836e-16	2.06513e-14	clusterNR5A2/ONECUT1/3+ neurons_vs_others	NR5A2/ONECUT1/3+ neurons
RYR3	RYR3	2.37817	7.79705	356.618	1.89091e-16	2.099e-14	clusterNR5A2/ONECUT1/3+ neurons_vs_others	NR5A2/ONECUT1/3+ neurons
AC016642.11	AC016642.1	1.83187	7.21349	207.177	1.93111e-16	2.1289e-14	clusterNR5A2/ONECUT1/3+ neurons_vs_others	NR5A2/ONECUT1/3+ neurons
AC008056.21	AC008056.2	2.31342	5.62816	206.889	1.97267e-16	2.16129e-14	clusterNR5A2/ONECUT1/3+ neurons_vs_others	NR5A2/ONECUT1/3+ neurons
FSTL5	FSTL5	3.32336	4.52102	273.984	2.08774e-16	2.27333e-14	clusterNR5A2/ONECUT1/3+ neurons_vs_others	NR5A2/ONECUT1/3+ neurons
TSPAN71	TSPAN7	2.24759	6.56987	205.694	2.15535e-16	2.33264e-14	clusterNR5A2/ONECUT1/3+ neurons_vs_others	NR5A2/ONECUT1/3+ neurons
C4orf48	C4orf48	2.52695	5.15108	205.385	2.2054e-16	2.37234e-14	clusterNR5A2/ONECUT1/3+ neurons_vs_others	NR5A2/ONECUT1/3+ neurons
TH1	TH	4.86972	3.79479	240.832	2.27645e-16	2.43402e-14	clusterNR5A2/ONECUT1/3+ neurons_vs_others	NR5A2/ONECUT1/3+ neurons
CAMK2N1	CAMK2N1	4.65383	2.99108	220.836	2.30068e-16	2.44519e-14	clusterNR5A2/ONECUT1/3+ neurons_vs_others	NR5A2/ONECUT1/3+ neurons
PLXNA4	PLXNA4	1.74337	6.50402	204.706	2.32e-16	2.45105e-14	clusterNR5A2/ONECUT1/3+ neurons_vs_others	NR5A2/ONECUT1/3+ neurons
AL445623.2	AL445623.2	1.77305	6.65525	202.993	2.63754e-16	2.77005e-14	clusterNR5A2/ONECUT1/3+ neurons_vs_others	NR5A2/ONECUT1/3+ neurons
SH3RF3	SH3RF3	2.90688	3.91285	202.603	2.71612e-16	2.83579e-14	clusterNR5A2/ONECUT1/3+ neurons_vs_others	NR5A2/ONECUT1/3+ neurons
GRM7	GRM7	2.88923	7.96705	443.602	2.82612e-16	2.93338e-14	clusterNR5A2/ONECUT1/3+ neurons_vs_others	NR5A2/ONECUT1/3+ neurons
ANKRD18A	ANKRD18A	4.46555	3.11134	216.363	3.1061e-16	3.20524e-14	clusterNR5A2/ONECUT1/3+ neurons_vs_others	NR5A2/ONECUT1/3+ neurons
CNTNAP2	CNTNAP2	4.45967	9.58841	782.99	3.16064e-16	3.24267e-14	clusterNR5A2/ONECUT1/3+ neurons_vs_others	NR5A2/ONECUT1/3+ neurons
GCNT1	GCNT1	1.87314	6.3611	205.895	3.42746e-16	3.49621e-14	clusterNR5A2/ONECUT1/3+ neurons_vs_others	NR5A2/ONECUT1/3+ neurons
VWA5B1	VWA5B1	3.95315	4.08892	213.829	3.6907e-16	3.74322e-14	clusterNR5A2/ONECUT1/3+ neurons_vs_others	NR5A2/ONECUT1/3+ neurons
STXBP5-AS11	STXBP5-AS1	1.8538	7.3449	212.016	3.75235e-16	3.78412e-14	clusterNR5A2/ONECUT1/3+ neurons_vs_others	NR5A2/ONECUT1/3+ neurons
ANK21	ANK2	1.27848	10.0266	197.569	3.98397e-16	3.995e-14	clusterNR5A2/ONECUT1/3+ neurons_vs_others	NR5A2/ONECUT1/3+ neurons
SVOP2	SVOP	2.77821	6.03295	210.111	4.76903e-16	4.75537e-14	clusterNR5A2/ONECUT1/3+ neurons_vs_others	NR5A2/ONECUT1/3+ neurons
AL391807.1	AL391807.1	2.44132	6.32999	272.535	5.83208e-16	5.77063e-14	clusterNR5A2/ONECUT1/3+ neurons_vs_others	NR5A2/ONECUT1/3+ neurons
PLXNA2	PLXNA2	2.4509	5.57536	224.049	5.8582e-16	5.77063e-14	clusterNR5A2/ONECUT1/3+ neurons_vs_others	NR5A2/ONECUT1/3+ neurons
SCN3B1	SCN3B	2.34875	5.50059	192.337	5.98587e-16	5.80564e-14	clusterNR5A2/ONECUT1/3+ neurons_vs_others	NR5A2/ONECUT1/3+ neurons
CACNA1C	CACNA1C	1.43019	7.94916	192.226	6.03831e-16	5.82467e-14	clusterNR5A2/ONECUT1/3+ neurons_vs_others	NR5A2/ONECUT1/3+ neurons
KCNMA11	KCNMA1	2.31606	7.26517	270.886	6.13115e-16	5.88226e-14	clusterNR5A2/ONECUT1/3+ neurons_vs_others	NR5A2/ONECUT1/3+ neurons
AL158840.1	AL158840.1	3.87258	2.88461	191.952	6.17005e-16	5.88776e-14	clusterNR5A2/ONECUT1/3+ neurons_vs_others	NR5A2/ONECUT1/3+ neurons
LINC005991	LINC00599	2.38284	5.58006	191.642	6.32276e-16	6.00121e-14	clusterNR5A2/ONECUT1/3+ neurons_vs_others	NR5A2/ONECUT1/3+ neurons
LINC01322	LINC01322	1.79409	5.90488	190.815	6.75024e-16	6.37287e-14	clusterNR5A2/ONECUT1/3+ neurons_vs_others	NR5A2/ONECUT1/3+ neurons
SYNDIG1	SYNDIG1	3.78288	4.88039	323.002	7.69809e-16	7.22928e-14	clusterNR5A2/ONECUT1/3+ neurons_vs_others	NR5A2/ONECUT1/3+ neurons
AFF3	AFF3	2.30227	8.213	332.424	8.14383e-16	7.54386e-14	clusterNR5A2/ONECUT1/3+ neurons_vs_others	NR5A2/ONECUT1/3+ neurons
AC140912.1	AC140912.1	4.57087	3.36604	202.522	8.14716e-16	7.54386e-14	clusterNR5A2/ONECUT1/3+ neurons_vs_others	NR5A2/ONECUT1/3+ neurons
RASGRF11	RASGRF1	4.21128	3.82973	202.499	8.16058e-16	7.54386e-14	clusterNR5A2/ONECUT1/3+ neurons_vs_others	NR5A2/ONECUT1/3+ neurons
TMEM132E	TMEM132E	5.3442	1.51463	186.388	9.61977e-16	8.8467e-14	clusterNR5A2/ONECUT1/3+ neurons_vs_others	NR5A2/ONECUT1/3+ neurons
TUBB2B1	TUBB2B	1.46532	7.10074	185.469	1.03633e-15	9.48134e-14	clusterNR5A2/ONECUT1/3+ neurons_vs_others	NR5A2/ONECUT1/3+ neurons
LRRC7	LRRC7	1.92196	7.68924	251.324	1.04494e-15	9.5111e-14	clusterNR5A2/ONECUT1/3+ neurons_vs_others	NR5A2/ONECUT1/3+ neurons
KCTD8	KCTD8	3.00022	4.43936	228.192	1.09643e-15	9.92887e-14	clusterNR5A2/ONECUT1/3+ neurons_vs_others	NR5A2/ONECUT1/3+ neurons
SLC35F3	SLC35F3	4.49243	6.53753	607.539	1.17436e-15	1.05805e-13	clusterNR5A2/ONECUT1/3+ neurons_vs_others	NR5A2/ONECUT1/3+ neurons
LINC00903	LINC00903	3.7735	3.84282	228.218	1.26301e-15	1.13218e-13	clusterNR5A2/ONECUT1/3+ neurons_vs_others	NR5A2/ONECUT1/3+ neurons
HSPA12A	HSPA12A	2.0837	5.97672	203.842	1.29133e-15	1.15175e-13	clusterNR5A2/ONECUT1/3+ neurons_vs_others	NR5A2/ONECUT1/3+ neurons
FAM163A	FAM163A	4.66347	1.74363	182.455	1.32567e-15	1.17637e-13	clusterNR5A2/ONECUT1/3+ neurons_vs_others	NR5A2/ONECUT1/3+ neurons
MARCH41	MARCH4	2.39324	6.31068	196.069	1.34004e-15	1.17637e-13	clusterNR5A2/ONECUT1/3+ neurons_vs_others	NR5A2/ONECUT1/3+ neurons
SNTG2	SNTG2	3.13272	3.9213	203.246	1.34283e-15	1.17637e-13	clusterNR5A2/ONECUT1/3+ neurons_vs_others	NR5A2/ONECUT1/3+ neurons
ERC2	ERC2	1.33446	8.81782	182.239	1.34955e-15	1.17637e-13	clusterNR5A2/ONECUT1/3+ neurons_vs_others	NR5A2/ONECUT1/3+ neurons
AC024382.1	AC024382.1	2.93252	3.25901	182.216	1.35207e-15	1.17637e-13	clusterNR5A2/ONECUT1/3+ neurons_vs_others	NR5A2/ONECUT1/3+ neurons
TANC2	TANC2	1.21076	9.18683	181.174	1.4735e-15	1.27577e-13	clusterNR5A2/ONECUT1/3+ neurons_vs_others	NR5A2/ONECUT1/3+ neurons
AC069228.12	AC069228.1	1.51206	8.45053	182.441	1.52107e-15	1.30553e-13	clusterNR5A2/ONECUT1/3+ neurons_vs_others	NR5A2/ONECUT1/3+ neurons
GRIN3A1	GRIN3A	4.00208	5.53743	378.776	1.52259e-15	1.30553e-13	clusterNR5A2/ONECUT1/3+ neurons_vs_others	NR5A2/ONECUT1/3+ neurons
AC006058.1	AC006058.1	5.51886	2.00989	209.962	1.54425e-15	1.31774e-13	clusterNR5A2/ONECUT1/3+ neurons_vs_others	NR5A2/ONECUT1/3+ neurons
LINC01414	LINC01414	4.77353	6.20777	2237.1	8.14209e-34	1.44514e-29	clusterOptic area progenitors_vs_others	Optic area progenitors
NR2F1	NR2F1	7.03947	4.33884	1200.38	6.89501e-29	6.11898e-25	clusterOptic area progenitors_vs_others	Optic area progenitors
SFRP2	SFRP2	7.21685	5.12096	1443.58	7.48817e-28	4.43025e-24	clusterOptic area progenitors_vs_others	Optic area progenitors
VIM	VIM	3.26682	6.64011	891.692	7.39234e-27	3.28017e-23	clusterOptic area progenitors_vs_others	Optic area progenitors
COL2A1	COL2A1	5.3902	4.69729	768.108	9.53669e-26	3.38533e-22	clusterOptic area progenitors_vs_others	Optic area progenitors
YAP1	YAP1	3.44645	6.07311	751.871	1.37368e-25	4.06358e-22	clusterOptic area progenitors_vs_others	Optic area progenitors
PRSS23	PRSS23	3.82765	5.18037	665.31	1.10211e-24	2.46334e-21	clusterOptic area progenitors_vs_others	Optic area progenitors
AL137139.2	AL137139.2	3.94758	4.22159	665.02	1.1103e-24	2.46334e-21	clusterOptic area progenitors_vs_others	Optic area progenitors
DAPL1	DAPL1	6.66936	3.64103	711.567	2.99161e-24	5.89978e-21	clusterOptic area progenitors_vs_others	Optic area progenitors
MRC2	MRC2	3.68923	5.77949	571.451	1.44188e-23	2.55919e-20	clusterOptic area progenitors_vs_others	Optic area progenitors
CDH6	CDH6	2.99033	6.83478	653.185	2.11068e-23	3.40568e-20	clusterOptic area progenitors_vs_others	Optic area progenitors
AC069133.1	AC069133.1	6.53059	2.96955	611.9	3.37782e-23	4.6472e-20	clusterOptic area progenitors_vs_others	Optic area progenitors
PLPP3	PLPP3	3.50736	4.59299	542.991	3.40377e-23	4.6472e-20	clusterOptic area progenitors_vs_others	Optic area progenitors
ROR2	ROR2	3.74291	4.55966	538.09	3.96313e-23	5.0244e-20	clusterOptic area progenitors_vs_others	Optic area progenitors
PRELID2	PRELID2	2.73759	5.85401	470.346	3.75315e-22	4.44097e-19	clusterOptic area progenitors_vs_others	Optic area progenitors
CLVS1	CLVS1	2.62777	6.14182	461.779	5.09456e-22	5.65146e-19	clusterOptic area progenitors_vs_others	Optic area progenitors
AP001528.1	AP001528.1	3.96931	4.07813	454.946	6.5252e-22	6.43421e-19	clusterOptic area progenitors_vs_others	Optic area progenitors
CYP1B1	CYP1B1	6.53801	3.38935	535.816	1.35702e-21	1.26767e-18	clusterOptic area progenitors_vs_others	Optic area progenitors
AC079298.3	AC079298.3	3.91137	5.36323	540.6	1.64129e-21	1.45656e-18	clusterOptic area progenitors_vs_others	Optic area progenitors
LINC01289	LINC01289	5.63544	2.49655	428.421	1.76447e-21	1.49132e-18	clusterOptic area progenitors_vs_others	Optic area progenitors
CLYBL	CLYBL	2.88151	5.45841	425.301	1.99089e-21	1.6062e-18	clusterOptic area progenitors_vs_others	Optic area progenitors
PPM1H	PPM1H	2.89994	5.35814	414.463	3.04796e-21	2.3521e-18	clusterOptic area progenitors_vs_others	Optic area progenitors
CDH20	CDH20	3.55931	5.71422	581.12	8.05776e-21	5.95905e-18	clusterOptic area progenitors_vs_others	Optic area progenitors
MMRN1	MMRN1	4.8717	3.9337	385.048	1.02189e-20	7.25503e-18	clusterOptic area progenitors_vs_others	Optic area progenitors
CDON	CDON	2.83163	6.0244	449.502	1.07242e-20	7.32089e-18	clusterOptic area progenitors_vs_others	Optic area progenitors
NR2F1-AS1	NR2F1-AS1	6.51112	5.08499	977.493	1.5158e-20	9.9644e-18	clusterOptic area progenitors_vs_others	Optic area progenitors
LINC01508	LINC01508	4.29164	3.55927	367.664	2.1752e-20	1.37884e-17	clusterOptic area progenitors_vs_others	Optic area progenitors
FKBP10	FKBP10	3.15432	5.38626	362.27	2.76821e-20	1.69424e-17	clusterOptic area progenitors_vs_others	Optic area progenitors
HES1	HES1	5.19601	4.48263	393.206	3.65738e-20	2.16383e-17	clusterOptic area progenitors_vs_others	Optic area progenitors
PAX2	PAX2	6.83987	3.20094	448.388	7.0719e-20	4.04901e-17	clusterOptic area progenitors_vs_others	Optic area progenitors
GLI2	GLI2	4.75662	2.88848	340.791	7.47663e-20	4.06291e-17	clusterOptic area progenitors_vs_others	Optic area progenitors
BCKDHB	BCKDHB	1.80103	8.18481	340.575	7.55401e-20	4.06291e-17	clusterOptic area progenitors_vs_others	Optic area progenitors
CNTN3	CNTN3	3.53375	3.80033	330.364	1.23645e-19	6.45461e-17	clusterOptic area progenitors_vs_others	Optic area progenitors
TMEM232	TMEM232	2.38303	7.16914	412.118	1.77024e-19	8.97717e-17	clusterOptic area progenitors_vs_others	Optic area progenitors
AC009139.1	AC009139.1	5.75093	2.39876	301.314	5.43786e-19	2.53991e-16	clusterOptic area progenitors_vs_others	Optic area progenitors
DNAH11	DNAH11	3.70569	4.3091	320.239	6.36083e-19	2.89483e-16	clusterOptic area progenitors_vs_others	Optic area progenitors
GMDS-DT	GMDS-DT	1.57284	6.9238	297.858	6.54079e-19	2.90231e-16	clusterOptic area progenitors_vs_others	Optic area progenitors
ROR1	ROR1	4.01958	4.86642	420.298	9.56256e-19	4.13966e-16	clusterOptic area progenitors_vs_others	Optic area progenitors
HMX1	HMX1	8.41529	2.78324	480.216	1.29541e-18	5.40326e-16	clusterOptic area progenitors_vs_others	Optic area progenitors
MDFIC	MDFIC	3.82953	4.6962	323.445	1.30903e-18	5.40326e-16	clusterOptic area progenitors_vs_others	Optic area progenitors
AL356113.1	AL356113.1	4.10525	3.67725	284.051	1.39507e-18	5.5147e-16	clusterOptic area progenitors_vs_others	Optic area progenitors
PLEKHG4B1	PLEKHG4B	2.02504	6.66064	284.011	1.39817e-18	5.5147e-16	clusterOptic area progenitors_vs_others	Optic area progenitors
LYN	LYN	4.32743	3.26132	283.024	1.47784e-18	5.65168e-16	clusterOptic area progenitors_vs_others	Optic area progenitors
NRIP1	NRIP1	1.92598	6.89206	282.8	1.49659e-18	5.65168e-16	clusterOptic area progenitors_vs_others	Optic area progenitors
PARD3B	PARD3B	2.07617	7.82508	311.051	2.50284e-18	9.06591e-16	clusterOptic area progenitors_vs_others	Optic area progenitors
AC113386.1	AC113386.1	3.03345	6.50704	469.411	2.85101e-18	1.01205e-15	clusterOptic area progenitors_vs_others	Optic area progenitors
PRDX6	PRDX6	3.10398	4.41704	265.513	4.0686e-18	1.38872e-15	clusterOptic area progenitors_vs_others	Optic area progenitors
LINC01884	LINC01884	6.35172	2.68276	328.809	5.54053e-18	1.85545e-15	clusterOptic area progenitors_vs_others	Optic area progenitors
CPAMD8	CPAMD8	2.98512	5.02094	294.421	8.98887e-18	2.79901e-15	clusterOptic area progenitors_vs_others	Optic area progenitors
MAP3K20	MAP3K20	2.47226	5.09488	251.773	9.39455e-18	2.82617e-15	clusterOptic area progenitors_vs_others	Optic area progenitors
KIAA1217	KIAA1217	3.60466	7.60691	654.078	9.69518e-18	2.868e-15	clusterOptic area progenitors_vs_others	Optic area progenitors
GPR180	GPR180	2.15796	5.68413	245.984	1.3529e-17	3.81153e-15	clusterOptic area progenitors_vs_others	Optic area progenitors
LRP2	LRP2	2.68831	6.76443	382.752	1.54391e-17	4.2817e-15	clusterOptic area progenitors_vs_others	Optic area progenitors
AC064843.1	AC064843.1	4.58322	2.22926	243.619	1.57374e-17	4.29728e-15	clusterOptic area progenitors_vs_others	Optic area progenitors
C1orf54	C1orf54	3.31786	4.73394	260.168	1.61759e-17	4.35009e-15	clusterOptic area progenitors_vs_others	Optic area progenitors
SPARC	SPARC	3.81955	5.29583	294.03	1.77871e-17	4.71199e-15	clusterOptic area progenitors_vs_others	Optic area progenitors
VSX2	VSX2	6.60174	1.6249	259.984	2.04283e-17	5.23054e-15	clusterOptic area progenitors_vs_others	Optic area progenitors
PLXDC2	PLXDC2	2.12529	7.64288	321.504	2.06636e-17	5.23054e-15	clusterOptic area progenitors_vs_others	Optic area progenitors
CA2	CA2	4.55774	2.9935	239.216	2.09233e-17	5.23054e-15	clusterOptic area progenitors_vs_others	Optic area progenitors
BOC	BOC	4.08273	3.62977	236.82	2.448e-17	6.03466e-15	clusterOptic area progenitors_vs_others	Optic area progenitors
UACA	UACA	3.7157	4.30807	234.432	2.86643e-17	6.96936e-15	clusterOptic area progenitors_vs_others	Optic area progenitors
WWOX	WWOX	1.58982	8.23441	231.043	3.59467e-17	8.62187e-15	clusterOptic area progenitors_vs_others	Optic area progenitors
FIGN	FIGN	3.45095	6.66814	513.994	3.82893e-17	9.0613e-15	clusterOptic area progenitors_vs_others	Optic area progenitors
SIK2	SIK2	1.63623	7.68297	226.948	5.09761e-17	1.19049e-14	clusterOptic area progenitors_vs_others	Optic area progenitors
MIR124-2HG1	MIR124-2HG	2.85881	4.77141	224.316	5.68339e-17	1.31006e-14	clusterOptic area progenitors_vs_others	Optic area progenitors
ZCCHC7	ZCCHC7	1.2932	8.06784	219.974	7.6875e-17	1.72716e-14	clusterOptic area progenitors_vs_others	Optic area progenitors
AC012409.2	AC012409.2	5.12595	2.25553	233.039	9.28642e-17	2.06031e-14	clusterOptic area progenitors_vs_others	Optic area progenitors
CYP1B1-AS1	CYP1B1-AS1	5.04272	3.19909	306.198	9.5437e-17	2.09125e-14	clusterOptic area progenitors_vs_others	Optic area progenitors
AC096570.2	AC096570.2	6.65377	4.40816	537.818	9.84231e-17	2.13038e-14	clusterOptic area progenitors_vs_others	Optic area progenitors
CLEC19A	CLEC19A	6.95406	1.7978	281.826	1.04012e-16	2.22422e-14	clusterOptic area progenitors_vs_others	Optic area progenitors
RAB31	RAB31	2.01809	6.14646	225.884	1.13581e-16	2.39993e-14	clusterOptic area progenitors_vs_others	Optic area progenitors
KIF23	KIF23	4.23646	4.06592	213.842	1.18816e-16	2.48102e-14	clusterOptic area progenitors_vs_others	Optic area progenitors
LRRN1	LRRN1	1.68369	6.12425	211.713	1.38559e-16	2.85964e-14	clusterOptic area progenitors_vs_others	Optic area progenitors
ARHGAP11B	ARHGAP11B	4.26925	4.87276	295.896	1.51233e-16	3.05027e-14	clusterOptic area progenitors_vs_others	Optic area progenitors
PPP2R1B	PPP2R1B	1.99688	5.32483	209.711	1.603e-16	3.19681e-14	clusterOptic area progenitors_vs_others	Optic area progenitors
RREB1	RREB1	3.93978	3.94633	209.43	1.63632e-16	3.22701e-14	clusterOptic area progenitors_vs_others	Optic area progenitors
ZIC1	ZIC1	5.56116	2.61165	261.622	1.79888e-16	3.5086e-14	clusterOptic area progenitors_vs_others	Optic area progenitors
PCSK5	PCSK5	3.38465	5.22646	342.376	1.99075e-16	3.84063e-14	clusterOptic area progenitors_vs_others	Optic area progenitors
ALDH1A3	ALDH1A3	7.57538	1.64801	267.621	2.08586e-16	3.98085e-14	clusterOptic area progenitors_vs_others	Optic area progenitors
TFEC	TFEC	5.40904	2.25793	217.843	2.22013e-16	4.19203e-14	clusterOptic area progenitors_vs_others	Optic area progenitors
FBXL7	FBXL7	1.50914	8.3938	204.733	2.31532e-16	4.32575e-14	clusterOptic area progenitors_vs_others	Optic area progenitors
DCDC1	DCDC1	2.14039	5.35156	203.136	2.60934e-16	4.82428e-14	clusterOptic area progenitors_vs_others	Optic area progenitors
CDK1	CDK1	5.97503	3.34278	237.8	2.72034e-16	4.97766e-14	clusterOptic area progenitors_vs_others	Optic area progenitors
AC015522.1	AC015522.1	4.09157	2.61393	199.438	3.45252e-16	6.0672e-14	clusterOptic area progenitors_vs_others	Optic area progenitors
EFEMP1	EFEMP1	3.77861	3.26492	197.957	3.86698e-16	6.72893e-14	clusterOptic area progenitors_vs_others	Optic area progenitors
SLC6A161	SLC6A16	2.44189	5.05583	197.653	3.95834e-16	6.82102e-14	clusterOptic area progenitors_vs_others	Optic area progenitors
DIO3OS	DIO3OS	3.63611	2.90971	197.412	4.03236e-16	6.88177e-14	clusterOptic area progenitors_vs_others	Optic area progenitors
ESCO2	ESCO2	5.902	3.69021	229.55	4.46301e-16	7.50559e-14	clusterOptic area progenitors_vs_others	Optic area progenitors
TPBG	TPBG	6.4812	2.54571	252.755	4.48247e-16	7.50559e-14	clusterOptic area progenitors_vs_others	Optic area progenitors
SMAD31	SMAD3	2.66246	5.44575	205.87	6.90381e-16	1.13459e-13	clusterOptic area progenitors_vs_others	Optic area progenitors
SMAD6	SMAD6	3.83338	4.07127	190.223	7.07438e-16	1.14985e-13	clusterOptic area progenitors_vs_others	Optic area progenitors
ANXA5	ANXA5	3.15192	3.6169	190.132	7.12624e-16	1.14985e-13	clusterOptic area progenitors_vs_others	Optic area progenitors
CD47	CD47	2.69425	5.56824	268.378	7.88307e-16	1.24926e-13	clusterOptic area progenitors_vs_others	Optic area progenitors
LEFTY2	LEFTY2	6.13907	2.6718	240.451	8.70997e-16	1.36808e-13	clusterOptic area progenitors_vs_others	Optic area progenitors
AL359715.1	AL359715.1	2.67411	4.11226	184.051	1.16315e-15	1.81095e-13	clusterOptic area progenitors_vs_others	Optic area progenitors
TCERG1L	TCERG1L	2.77476	4.38805	199.822	1.22632e-15	1.8927e-13	clusterOptic area progenitors_vs_others	Optic area progenitors
CLDN1	CLDN1	6.30523	1.1591	196.441	1.26727e-15	1.93904e-13	clusterOptic area progenitors_vs_others	Optic area progenitors
CDH11	CDH11	3.69818	6.13144	428.596	1.61958e-15	2.43609e-13	clusterOptic area progenitors_vs_others	Optic area progenitors
AF117829.1	AF117829.1	1.57969	6.9042	178.333	1.86708e-15	2.73874e-13	clusterOptic area progenitors_vs_others	Optic area progenitors
PAX5	PAX5	4.87166	1.78505	191.092	1.88742e-15	2.74588e-13	clusterOptic area progenitors_vs_others	Optic area progenitors
TNFRSF10B	TNFRSF10B	2.67661	4.58785	176.329	2.21072e-15	3.16437e-13	clusterOptic area progenitors_vs_others	Optic area progenitors
ACSS3	ACSS3	1.8432	5.18425	175.132	2.44727e-15	3.47493e-13	clusterOptic area progenitors_vs_others	Optic area progenitors
SUCLG2	SUCLG2	2.06578	5.10971	174.999	2.47511e-15	3.48657e-13	clusterOptic area progenitors_vs_others	Optic area progenitors
PLAG1	PLAG1	2.35658	4.99439	172.957	2.94796e-15	4.11995e-13	clusterOptic area progenitors_vs_others	Optic area progenitors
ZFP36L1	ZFP36L1	4.60763	3.85111	200.063	3.007e-15	4.16963e-13	clusterOptic area progenitors_vs_others	Optic area progenitors
PAX6	PAX6	4.18911	3.32866	225.484	3.5308e-15	4.858e-13	clusterOptic area progenitors_vs_others	Optic area progenitors
TNS3	TNS3	2.25317	5.20343	170.338	3.69865e-15	5.0498e-13	clusterOptic area progenitors_vs_others	Optic area progenitors
CDCA7L	CDCA7L	5.33509	2.92601	196.754	3.78122e-15	5.12312e-13	clusterOptic area progenitors_vs_others	Optic area progenitors
HEPH	HEPH	3.09532	4.10942	193.3	4.35828e-15	5.86024e-13	clusterOptic area progenitors_vs_others	Optic area progenitors
MYBL1	MYBL1	4.68694	3.31352	196.673	4.65961e-15	6.2183e-13	clusterOptic area progenitors_vs_others	Optic area progenitors
ADAMTS18	ADAMTS18	6.08311	5.09411	513.869	5.9543e-15	7.82836e-13	clusterOptic area progenitors_vs_others	Optic area progenitors
SEMA5A	SEMA5A	3.13013	6.90838	350.876	7.04952e-15	9.20014e-13	clusterOptic area progenitors_vs_others	Optic area progenitors
MITF	MITF	3.39729	4.75238	167.732	7.30154e-15	9.45949e-13	clusterOptic area progenitors_vs_others	Optic area progenitors
Z96074.1	Z96074.1	4.15667	2.3969	164.187	7.47623e-15	9.61562e-13	clusterOptic area progenitors_vs_others	Optic area progenitors
CLRN1	CLRN1	4.64904	1.80589	161.866	7.8623e-15	1.00394e-12	clusterOptic area progenitors_vs_others	Optic area progenitors
CREB3L2	CREB3L2	2.02562	5.05219	161.065	8.45702e-15	1.07217e-12	clusterOptic area progenitors_vs_others	Optic area progenitors
FIRRE	FIRRE	2.32537	5.50015	196.749	8.78232e-15	1.10504e-12	clusterOptic area progenitors_vs_others	Optic area progenitors
MAP3K8	MAP3K8	4.06709	2.63197	160.58	8.84084e-15	1.10504e-12	clusterOptic area progenitors_vs_others	Optic area progenitors
FOXP1	FOXP1	1.52692	7.46387	172.617	8.93183e-15	1.10861e-12	clusterOptic area progenitors_vs_others	Optic area progenitors
REST	REST	2.64895	5.40453	192.216	9.27484e-15	1.13145e-12	clusterOptic area progenitors_vs_others	Optic area progenitors
FBN2	FBN2	3.95676	5.75341	409.976	9.28166e-15	1.13145e-12	clusterOptic area progenitors_vs_others	Optic area progenitors
PDZRN3	PDZRN3	4.00844	4.68827	302.822	9.32143e-15	1.13145e-12	clusterOptic area progenitors_vs_others	Optic area progenitors
LINC01515	LINC01515	2.64141	6.39714	266.779	9.37085e-15	1.13145e-12	clusterOptic area progenitors_vs_others	Optic area progenitors
ATP1A2	ATP1A2	4.96929	2.56236	183.255	9.98187e-15	1.18928e-12	clusterOptic area progenitors_vs_others	Optic area progenitors
BMPR1B	BMPR1B	5.20702	5.57127	486.772	9.98382e-15	1.18928e-12	clusterOptic area progenitors_vs_others	Optic area progenitors
THRB	THRB	3.5782	2.983	169.334	1.13428e-14	1.34216e-12	clusterOptic area progenitors_vs_others	Optic area progenitors
LGR4	LGR4	2.73677	7.01393	332.961	1.27883e-14	1.49329e-12	clusterOptic area progenitors_vs_others	Optic area progenitors
AC078955.1	AC078955.1	4.19162	3.33513	164.705	1.56659e-14	1.81237e-12	clusterOptic area progenitors_vs_others	Optic area progenitors
P3H2	P3H2	2.09425	5.51829	170.259	1.57251e-14	1.81237e-12	clusterOptic area progenitors_vs_others	Optic area progenitors
HMGN2	HMGN2	1.47818	6.75108	153.593	1.69554e-14	1.92911e-12	clusterOptic area progenitors_vs_others	Optic area progenitors
LGR5	LGR5	3.98562	2.98546	153.309	1.74189e-14	1.96923e-12	clusterOptic area progenitors_vs_others	Optic area progenitors
RCN1	RCN1	1.69152	4.83877	151.723	2.02656e-14	2.27485e-12	clusterOptic area progenitors_vs_others	Optic area progenitors
AC011306.1	AC011306.1	3.3953	3.25878	157.098	2.03787e-14	2.27485e-12	clusterOptic area progenitors_vs_others	Optic area progenitors
PAUPAR	PAUPAR	4.1385	2.19492	151.15	2.14115e-14	2.3752e-12	clusterOptic area progenitors_vs_others	Optic area progenitors
ROR1-AS1	ROR1-AS1	4.58859	2.63462	157.509	2.18938e-14	2.41362e-12	clusterOptic area progenitors_vs_others	Optic area progenitors
AC008700.1	AC008700.1	3.80972	3.28749	160.711	2.21155e-14	2.42301e-12	clusterOptic area progenitors_vs_others	Optic area progenitors
GTSE1	GTSE1	5.63919	4.23334	221.474	2.37296e-14	2.56815e-12	clusterOptic area progenitors_vs_others	Optic area progenitors
KIF11	KIF11	4.31362	4.47276	210.174	2.48178e-14	2.66964e-12	clusterOptic area progenitors_vs_others	Optic area progenitors
AC092958.1	AC092958.1	4.21032	3.15365	158.977	2.57439e-14	2.7361e-12	clusterOptic area progenitors_vs_others	Optic area progenitors
ADAMTS9-AS2	ADAMTS9-AS2	2.18481	6.27852	203.982	2.98196e-14	3.15041e-12	clusterOptic area progenitors_vs_others	Optic area progenitors
NUP62CL	NUP62CL	2.67116	4.18488	146.716	3.29691e-14	3.46253e-12	clusterOptic area progenitors_vs_others	Optic area progenitors
DOCK1	DOCK1	1.95931	6.31253	174.451	3.47679e-14	3.62997e-12	clusterOptic area progenitors_vs_others	Optic area progenitors
GPC6	GPC6	1.31024	9.99917	147.633	3.71587e-14	3.8569e-12	clusterOptic area progenitors_vs_others	Optic area progenitors
LHX2	LHX2	2.38659	5.16492	159.444	3.78259e-14	3.90332e-12	clusterOptic area progenitors_vs_others	Optic area progenitors
NDC80	NDC80	4.09873	3.95964	172.419	3.86567e-14	3.966e-12	clusterOptic area progenitors_vs_others	Optic area progenitors
FANCB	FANCB	3.84073	3.51583	144.755	4.00385e-14	4.06082e-12	clusterOptic area progenitors_vs_others	Optic area progenitors
RHOBTB1	RHOBTB1	1.72252	5.49026	144.5	4.10693e-14	4.1417e-12	clusterOptic area progenitors_vs_others	Optic area progenitors
MID1	MID1	1.50544	6.92283	149.034	4.24584e-14	4.25759e-12	clusterOptic area progenitors_vs_others	Optic area progenitors
CFAP2991	CFAP299	2.94245	4.35503	143.383	4.59258e-14	4.55384e-12	clusterOptic area progenitors_vs_others	Optic area progenitors
NEIL3	NEIL3	6.10781	3.29131	168.948	4.72e-14	4.65418e-12	clusterOptic area progenitors_vs_others	Optic area progenitors
AC091906.1	AC091906.1	3.08605	4.88128	183.819	5.3727e-14	5.26851e-12	clusterOptic area progenitors_vs_others	Optic area progenitors
ELP4	ELP4	1.35541	6.85731	141.277	5.68101e-14	5.54023e-12	clusterOptic area progenitors_vs_others	Optic area progenitors
AC096570.1	AC096570.1	5.65443	5.3029	438.262	6.93474e-14	6.72594e-12	clusterOptic area progenitors_vs_others	Optic area progenitors
ZFP36L2	ZFP36L2	4.30231	3.41315	147.32	7.42027e-14	7.15774e-12	clusterOptic area progenitors_vs_others	Optic area progenitors
MIR217HG	MIR217HG	3.9213	2.91147	162.416	7.48668e-14	7.18276e-12	clusterOptic area progenitors_vs_others	Optic area progenitors
TLL1	TLL1	2.85296	4.43089	138.034	7.92174e-14	7.5593e-12	clusterOptic area progenitors_vs_others	Optic area progenitors
QPRT	QPRT	2.72123	3.79824	137.111	8.71816e-14	8.27479e-12	clusterOptic area progenitors_vs_others	Optic area progenitors
DEPDC1	DEPDC1	5.38395	3.02793	147.342	9.0298e-14	8.525e-12	clusterOptic area progenitors_vs_others	Optic area progenitors
MAN2A1	MAN2A1	2.1255	6.1714	194.839	9.31006e-14	8.69707e-12	clusterOptic area progenitors_vs_others	Optic area progenitors
TEAD21	TEAD2	3.13576	3.96486	144.71	9.49369e-14	8.82217e-12	clusterOptic area progenitors_vs_others	Optic area progenitors
TYMS	TYMS	3.05329	3.53308	135.921	9.87098e-14	9.07772e-12	clusterOptic area progenitors_vs_others	Optic area progenitors
ANP32E	ANP32E	2.83149	4.33766	135.823	9.97288e-14	9.12416e-12	clusterOptic area progenitors_vs_others	Optic area progenitors
ZIC3	ZIC3	5.9749	1.13213	153.814	1.0456e-13	9.43988e-12	clusterOptic area progenitors_vs_others	Optic area progenitors
AC019127.1	AC019127.1	2.90101	4.77164	162.737	1.04775e-13	9.43988e-12	clusterOptic area progenitors_vs_others	Optic area progenitors
GTDC1	GTDC1	2.02201	5.18801	145.201	1.07511e-13	9.63743e-12	clusterOptic area progenitors_vs_others	Optic area progenitors
KNL1	KNL1	4.28108	4.30435	175.055	1.14741e-13	1.02338e-11	clusterOptic area progenitors_vs_others	Optic area progenitors
PRICKLE1	PRICKLE1	2.80263	4.58977	178.515	1.26879e-13	1.12599e-11	clusterOptic area progenitors_vs_others	Optic area progenitors
MYLK	MYLK	1.98833	4.54732	133.092	1.33099e-13	1.17531e-11	clusterOptic area progenitors_vs_others	Optic area progenitors
AC090825.1	AC090825.1	1.67225	5.84798	132.826	2.01642e-13	1.71877e-11	clusterOptic area progenitors_vs_others	Optic area progenitors
ASAP2	ASAP2	1.22852	6.7443	129.038	2.06098e-13	1.74192e-11	clusterOptic area progenitors_vs_others	Optic area progenitors
PTH2	PTH2	6.94286	1.49366	182.262	2.07685e-13	1.74701e-11	clusterOptic area progenitors_vs_others	Optic area progenitors
HIF1A-AS3	HIF1A-AS3	1.43383	7.43453	139.887	2.3579e-13	1.94653e-11	clusterOptic area progenitors_vs_others	Optic area progenitors
PRDM5	PRDM5	2.08946	4.96081	127.207	2.51996e-13	2.06114e-11	clusterOptic area progenitors_vs_others	Optic area progenitors
SLC25A21	SLC25A21	2.13231	6.14649	166.437	2.59916e-13	2.11617e-11	clusterOptic area progenitors_vs_others	Optic area progenitors
IGFBP5	IGFBP5	2.46814	5.77112	172.333	2.61471e-13	2.11911e-11	clusterOptic area progenitors_vs_others	Optic area progenitors
AC021088.1	AC021088.1	2.68735	4.04662	126.395	2.75706e-13	2.22432e-11	clusterOptic area progenitors_vs_others	Optic area progenitors
TMTC2	TMTC2	1.28967	8.4097	128.842	2.80681e-13	2.25421e-11	clusterOptic area progenitors_vs_others	Optic area progenitors
PBK	PBK	5.19523	3.3741	147.757	2.82034e-13	2.25487e-11	clusterOptic area progenitors_vs_others	Optic area progenitors
ANKRD33B	ANKRD33B	3.31352	3.33051	129.899	2.92421e-13	2.32743e-11	clusterOptic area progenitors_vs_others	Optic area progenitors
SPART	SPART	1.80446	5.46334	125.789	2.94926e-13	2.33689e-11	clusterOptic area progenitors_vs_others	Optic area progenitors
MCUB	MCUB	1.95021	5.20134	125.607	3.00977e-13	2.36374e-11	clusterOptic area progenitors_vs_others	Optic area progenitors
SMOC11	SMOC1	3.30482	5.18318	205.005	3.46699e-13	2.67546e-11	clusterOptic area progenitors_vs_others	Optic area progenitors
LTBP1	LTBP1	2.4871	7.70887	246.825	3.60605e-13	2.77073e-11	clusterOptic area progenitors_vs_others	Optic area progenitors
CENPM	CENPM	3.16553	3.92344	123.545	3.7936e-13	2.88981e-11	clusterOptic area progenitors_vs_others	Optic area progenitors
ANGPT1	ANGPT1	2.86026	4.14498	122.989	4.04007e-13	3.05137e-11	clusterOptic area progenitors_vs_others	Optic area progenitors
HJURP	HJURP	5.49402	2.89336	130.764	4.06849e-13	3.05981e-11	clusterOptic area progenitors_vs_others	Optic area progenitors
AL035670.1	AL035670.1	2.66641	3.88675	122.842	4.10787e-13	3.07469e-11	clusterOptic area progenitors_vs_others	Optic area progenitors
DIO3	DIO3	4.41544	2.17768	141.675	4.12696e-13	3.07469e-11	clusterOptic area progenitors_vs_others	Optic area progenitors
AL365295.1	AL365295.1	1.71155	5.18496	122.361	4.33904e-13	3.16318e-11	clusterOptic area progenitors_vs_others	Optic area progenitors
UST	UST	2.44069	4.8592	151.985	4.34851e-13	3.16318e-11	clusterOptic area progenitors_vs_others	Optic area progenitors
HSPB1	HSPB1	4.70942	1.85987	137.767	4.43086e-13	3.20993e-11	clusterOptic area progenitors_vs_others	Optic area progenitors
ADAMTS17	ADAMTS17	3.04489	5.19308	177.31	4.45385e-13	3.21347e-11	clusterOptic area progenitors_vs_others	Optic area progenitors
FAM114A1	FAM114A1	2.23079	3.87496	121.751	4.65147e-13	3.32899e-11	clusterOptic area progenitors_vs_others	Optic area progenitors
VEGFA	VEGFA	2.17037	3.95921	121.241	4.9314e-13	3.51516e-11	clusterOptic area progenitors_vs_others	Optic area progenitors
MAF	MAF	2.88861	3.45061	121.151	4.98213e-13	3.53646e-11	clusterOptic area progenitors_vs_others	Optic area progenitors
NEMP1	NEMP1	2.63988	4.11475	121.118	5.00114e-13	3.53646e-11	clusterOptic area progenitors_vs_others	Optic area progenitors
C4orf47	C4orf47	2.04009	4.80347	123.915	5.05506e-13	3.56041e-11	clusterOptic area progenitors_vs_others	Optic area progenitors
CYP39A1	CYP39A1	3.02793	3.49048	120.627	5.29172e-13	3.69775e-11	clusterOptic area progenitors_vs_others	Optic area progenitors
AC093535.1	AC093535.1	1.9661	4.78638	120.454	5.39837e-13	3.75747e-11	clusterOptic area progenitors_vs_others	Optic area progenitors
SULF1	SULF1	2.33243	5.89875	157.418	5.59829e-13	3.88141e-11	clusterOptic area progenitors_vs_others	Optic area progenitors
TRPC5OS1	TRPC5OS	5.33341	5.54153	1225.68	4.16552e-29	7.39338e-25	clusterOTP+ neurons_vs_others	OTP+ neurons
MYT1L2	MYT1L	3.78069	7.72063	1001.65	9.97098e-28	8.84875e-24	clusterOTP+ neurons_vs_others	OTP+ neurons
PCA31	PCA3	3.71486	6.01162	954.652	2.28429e-27	1.35146e-23	clusterOTP+ neurons_vs_others	OTP+ neurons
PRUNE21	PRUNE2	2.6874	6.72986	888.653	7.83911e-27	3.47841e-23	clusterOTP+ neurons_vs_others	OTP+ neurons
PTPRN3	PTPRN	4.72704	6.49945	981.559	1.62005e-26	5.75085e-23	clusterOTP+ neurons_vs_others	OTP+ neurons
KCNC22	KCNC2	4.21623	6.00837	755.939	1.25278e-25	3.70594e-22	clusterOTP+ neurons_vs_others	OTP+ neurons
CELF42	CELF4	2.37926	7.99406	732.486	2.1451e-25	5.43906e-22	clusterOTP+ neurons_vs_others	OTP+ neurons
CHGB2	CHGB	4.68255	6.36674	815.739	3.28615e-25	7.29074e-22	clusterOTP+ neurons_vs_others	OTP+ neurons
LRRC52-AS1	LRRC52-AS1	6.10609	4.08116	792.172	5.28392e-25	1.04205e-21	clusterOTP+ neurons_vs_others	OTP+ neurons
TMEM59L2	TMEM59L	3.18875	6.69364	663.097	1.16623e-24	2.06994e-21	clusterOTP+ neurons_vs_others	OTP+ neurons
MIR7-3HG2	MIR7-3HG	3.07573	6.62749	648.165	1.71624e-24	2.76923e-21	clusterOTP+ neurons_vs_others	OTP+ neurons
ZCCHC121	ZCCHC12	5.12546	5.64759	844.844	1.96195e-24	2.90189e-21	clusterOTP+ neurons_vs_others	OTP+ neurons
GRIA23	GRIA2	2.1655	8.49309	623.242	3.3341e-24	4.55207e-21	clusterOTP+ neurons_vs_others	OTP+ neurons
RYR2	RYR2	3.83137	6.27733	1010.87	4.16584e-24	5.28139e-21	clusterOTP+ neurons_vs_others	OTP+ neurons
ISL13	ISL1	2.8753	7.32989	588.972	8.6676e-24	1.02561e-20	clusterOTP+ neurons_vs_others	OTP+ neurons
SCN2A2	SCN2A	2.69411	6.98268	582.104	1.05631e-23	1.17178e-20	clusterOTP+ neurons_vs_others	OTP+ neurons
SCG52	SCG5	3.01758	6.59949	586.127	1.32769e-23	1.38618e-20	clusterOTP+ neurons_vs_others	OTP+ neurons
TUBB2A2	TUBB2A	3.20899	6.56411	518.075	7.48069e-23	7.20812e-20	clusterOTP+ neurons_vs_others	OTP+ neurons
TSPAN72	TSPAN7	2.85588	6.56987	517.116	7.71617e-23	7.20812e-20	clusterOTP+ neurons_vs_others	OTP+ neurons
AC016642.12	AC016642.1	2.44717	7.21349	508.026	1.03811e-22	9.21267e-20	clusterOTP+ neurons_vs_others	OTP+ neurons
SYT53	SYT5	3.81342	5.86836	534.279	2.93876e-22	2.48381e-19	clusterOTP+ neurons_vs_others	OTP+ neurons
AC077690.11	AC077690.1	2.79196	6.20577	528.807	4.0957e-22	3.3043e-19	clusterOTP+ neurons_vs_others	OTP+ neurons
AP001605.11	AP001605.1	4.23466	4.94923	514.528	5.34315e-22	4.12329e-19	clusterOTP+ neurons_vs_others	OTP+ neurons
DSCAM2	DSCAM	3.31909	8.90315	723.773	1.44375e-21	1.06771e-18	clusterOTP+ neurons_vs_others	OTP+ neurons
GABRA21	GABRA2	3.10659	5.97813	510.266	2.26363e-21	1.59155e-18	clusterOTP+ neurons_vs_others	OTP+ neurons
IL18R11	IL18R1	4.78609	3.57294	421.253	2.33141e-21	1.59155e-18	clusterOTP+ neurons_vs_others	OTP+ neurons
L1CAM3	L1CAM	3.02203	5.76138	418.9	2.55708e-21	1.68095e-18	clusterOTP+ neurons_vs_others	OTP+ neurons
FRY1	FRY	1.93743	8.21307	415.322	2.94564e-21	1.86722e-18	clusterOTP+ neurons_vs_others	OTP+ neurons
OTP	OTP	4.94818	4.19634	454.022	3.85293e-21	2.35813e-18	clusterOTP+ neurons_vs_others	OTP+ neurons
GRM7-AS11	GRM7-AS1	3.51102	4.11641	402.587	4.91876e-21	2.9101e-18	clusterOTP+ neurons_vs_others	OTP+ neurons
SYP2	SYP	2.24813	6.51079	401.154	5.21572e-21	2.98625e-18	clusterOTP+ neurons_vs_others	OTP+ neurons
SCG32	SCG3	2.77115	6.54989	398.65	5.78125e-21	3.20661e-18	clusterOTP+ neurons_vs_others	OTP+ neurons
SVOP3	SVOP	3.15749	6.03295	438.806	6.58201e-21	3.51478e-18	clusterOTP+ neurons_vs_others	OTP+ neurons
SGCZ2	SGCZ	3.16038	7.84583	648.929	6.73292e-21	3.51478e-18	clusterOTP+ neurons_vs_others	OTP+ neurons
NELL12	NELL1	3.13703	6.16412	546.143	7.76414e-21	3.93731e-18	clusterOTP+ neurons_vs_others	OTP+ neurons
IQSEC33	IQSEC3	3.36769	5.83217	430.252	8.96243e-21	4.41872e-18	clusterOTP+ neurons_vs_others	OTP+ neurons
MBNL31	MBNL3	2.57588	7.12927	520.264	1.09253e-20	5.24088e-18	clusterOTP+ neurons_vs_others	OTP+ neurons
SPOCK21	SPOCK2	4.12735	4.41233	416.355	1.49829e-20	6.99821e-18	clusterOTP+ neurons_vs_others	OTP+ neurons
CACNA1E2	CACNA1E	2.60779	6.68285	382.262	1.88578e-20	8.58224e-18	clusterOTP+ neurons_vs_others	OTP+ neurons
ANK12	ANK1	2.74145	5.53916	365.606	2.38387e-20	1.05778e-17	clusterOTP+ neurons_vs_others	OTP+ neurons
PLXNA41	PLXNA4	1.98695	6.50402	362.621	2.72481e-20	1.15149e-17	clusterOTP+ neurons_vs_others	OTP+ neurons
STXBP5-AS12	STXBP5-AS1	2.23355	7.3449	395.641	2.84488e-20	1.17428e-17	clusterOTP+ neurons_vs_others	OTP+ neurons
SCN9A1	SCN9A	1.90358	7.92099	351.26	4.5749e-20	1.84545e-17	clusterOTP+ neurons_vs_others	OTP+ neurons
LINC005992	LINC00599	2.61037	5.58006	350.27	4.78979e-20	1.87971e-17	clusterOTP+ neurons_vs_others	OTP+ neurons
POMC1	POMC	3.37846	6.20462	386.025	4.87163e-20	1.87971e-17	clusterOTP+ neurons_vs_others	OTP+ neurons
GNAS1	GNAS	1.55366	9.53275	332.593	1.10907e-19	4.18827e-17	clusterOTP+ neurons_vs_others	OTP+ neurons
MAPT2	MAPT	2.04361	7.40635	331.511	1.16906e-19	4.32283e-17	clusterOTP+ neurons_vs_others	OTP+ neurons
CNGB11	CNGB1	4.27151	5.12073	420.257	1.57069e-19	5.68943e-17	clusterOTP+ neurons_vs_others	OTP+ neurons
ATP1A32	ATP1A3	2.65648	6.23528	320.374	2.0296e-19	7.20468e-17	clusterOTP+ neurons_vs_others	OTP+ neurons
HTATSF12	HTATSF1	1.95855	6.44948	309.055	3.62031e-19	1.25994e-16	clusterOTP+ neurons_vs_others	OTP+ neurons
GCNT11	GCNT1	2.00812	6.3611	317.377	4.41474e-19	1.50687e-16	clusterOTP+ neurons_vs_others	OTP+ neurons
TTC9B1	TTC9B	3.74415	5.06058	331.774	5.05568e-19	1.66656e-16	clusterOTP+ neurons_vs_others	OTP+ neurons
ARHGAP18	ARHGAP18	2.12997	5.58446	299.108	6.11695e-19	1.974e-16	clusterOTP+ neurons_vs_others	OTP+ neurons
KCNMA12	KCNMA1	2.65359	7.26517	458.757	6.47644e-19	2.05269e-16	clusterOTP+ neurons_vs_others	OTP+ neurons
NPM21	NPM2	3.63802	5.22243	324.506	7.10053e-19	2.211e-16	clusterOTP+ neurons_vs_others	OTP+ neurons
UBE3A2	UBE3A	1.40172	9.86769	295.303	7.50705e-19	2.29729e-16	clusterOTP+ neurons_vs_others	OTP+ neurons
VWA5B11	VWA5B1	3.94504	4.08892	319.004	9.22508e-19	2.77518e-16	clusterOTP+ neurons_vs_others	OTP+ neurons
ST8SIA31	ST8SIA3	3.41127	5.02156	315.641	1.08471e-18	3.20875e-16	clusterOTP+ neurons_vs_others	OTP+ neurons
MLLT112	MLLT11	2.2711	5.5291	286.702	1.2032e-18	3.50092e-16	clusterOTP+ neurons_vs_others	OTP+ neurons
SERPINE21	SERPINE2	2.43089	6.33646	346.945	1.28186e-18	3.66964e-16	clusterOTP+ neurons_vs_others	OTP+ neurons
TNR1	TNR	4.51541	5.84646	562.405	1.65834e-18	4.67204e-16	clusterOTP+ neurons_vs_others	OTP+ neurons
PTPRN22	PTPRN2	1.37931	9.20381	276.214	2.17623e-18	6.03529e-16	clusterOTP+ neurons_vs_others	OTP+ neurons
RGS72	RGS7	2.23332	8.06806	367.379	2.29628e-18	6.27027e-16	clusterOTP+ neurons_vs_others	OTP+ neurons
PCSK1	PCSK1	4.68992	3.9531	368.595	3.03471e-18	8.16108e-16	clusterOTP+ neurons_vs_others	OTP+ neurons
GABRG21	GABRG2	4.33361	4.38779	319.74	3.97972e-18	1.05427e-15	clusterOTP+ neurons_vs_others	OTP+ neurons
AC061961.11	AC061961.1	3.75277	4.79026	287.176	4.56675e-18	1.19199e-15	clusterOTP+ neurons_vs_others	OTP+ neurons
AC007563.2	AC007563.2	2.53516	5.34369	295.48	4.73795e-18	1.21875e-15	clusterOTP+ neurons_vs_others	OTP+ neurons
TRPC5	TRPC5	3.90863	7.42672	774.873	5.63674e-18	1.42923e-15	clusterOTP+ neurons_vs_others	OTP+ neurons
AC007535.1	AC007535.1	3.09708	4.04519	259.157	5.9628e-18	1.49062e-15	clusterOTP+ neurons_vs_others	OTP+ neurons
SCML41	SCML4	3.44309	4.62353	281.318	6.23695e-18	1.53749e-15	clusterOTP+ neurons_vs_others	OTP+ neurons
ROBO21	ROBO2	2.31468	9.50682	406.966	6.34907e-18	1.54369e-15	clusterOTP+ neurons_vs_others	OTP+ neurons
FRMPD41	FRMPD4	2.66575	6.2135	375.603	6.52001e-18	1.54546e-15	clusterOTP+ neurons_vs_others	OTP+ neurons
HAP1	HAP1	1.65354	6.25873	257.665	6.53048e-18	1.54546e-15	clusterOTP+ neurons_vs_others	OTP+ neurons
FAM135B	FAM135B	1.80952	6.58042	250.96	9.8842e-18	2.30835e-15	clusterOTP+ neurons_vs_others	OTP+ neurons
PHACTR32	PHACTR3	1.88328	6.11126	248.809	1.13133e-17	2.57436e-15	clusterOTP+ neurons_vs_others	OTP+ neurons
AP001604.1	AP001604.1	3.79958	4.19607	290.82	1.29991e-17	2.92052e-15	clusterOTP+ neurons_vs_others	OTP+ neurons
SCN3B2	SCN3B	2.23644	5.50059	244.955	1.44465e-17	3.20513e-15	clusterOTP+ neurons_vs_others	OTP+ neurons
STMN42	STMN4	3.17882	5.73193	265.377	1.5014e-17	3.28992e-15	clusterOTP+ neurons_vs_others	OTP+ neurons
LINC01568	LINC01568	3.32011	6.20228	498.367	1.70561e-17	3.66185e-15	clusterOTP+ neurons_vs_others	OTP+ neurons
PTGER3	PTGER3	3.86912	4.09102	242.137	1.73125e-17	3.66185e-15	clusterOTP+ neurons_vs_others	OTP+ neurons
KIF5C2	KIF5C	1.42943	8.35377	242.121	1.73303e-17	3.66185e-15	clusterOTP+ neurons_vs_others	OTP+ neurons
PTPRE1	PTPRE	1.87661	5.74093	241.249	1.83343e-17	3.82842e-15	clusterOTP+ neurons_vs_others	OTP+ neurons
VAT1L2	VAT1L	1.82933	8.43391	276.514	1.86144e-17	3.8417e-15	clusterOTP+ neurons_vs_others	OTP+ neurons
INA2	INA	3.12775	5.54666	258.283	2.25377e-17	4.59796e-15	clusterOTP+ neurons_vs_others	OTP+ neurons
ABLIM32	ABLIM3	2.58477	4.8329	237.795	2.29611e-17	4.63109e-15	clusterOTP+ neurons_vs_others	OTP+ neurons
DNAJC121	DNAJC12	3.69572	3.82154	255.177	2.70087e-17	5.38626e-15	clusterOTP+ neurons_vs_others	OTP+ neurons
AGBL4	AGBL4	2.77091	8.24761	457.341	2.926e-17	5.7704e-15	clusterOTP+ neurons_vs_others	OTP+ neurons
KLHL32	KLHL32	2.18553	5.71093	262.846	3.24023e-17	6.31988e-15	clusterOTP+ neurons_vs_others	OTP+ neurons
KIFAP3	KIFAP3	1.40682	7.48354	232.313	3.30122e-17	6.36884e-15	clusterOTP+ neurons_vs_others	OTP+ neurons
GRM71	GRM7	2.99744	7.96705	537.21	3.61168e-17	6.89287e-15	clusterOTP+ neurons_vs_others	OTP+ neurons
PGRMC11	PGRMC1	1.8247	6.11283	225.9	5.09671e-17	9.62356e-15	clusterOTP+ neurons_vs_others	OTP+ neurons
RAB37	RAB37	3.64536	3.91335	235.349	8.99819e-17	1.68115e-14	clusterOTP+ neurons_vs_others	OTP+ neurons
EEF1A21	EEF1A2	3.26482	4.89468	233.751	9.95268e-17	1.8401e-14	clusterOTP+ neurons_vs_others	OTP+ neurons
NRXN12	NRXN1	1.42019	10.3576	216.085	1.01198e-16	1.85172e-14	clusterOTP+ neurons_vs_others	OTP+ neurons
CADM3	CADM3	2.37394	4.58517	214.597	1.12548e-16	2.02132e-14	clusterOTP+ neurons_vs_others	OTP+ neurons
BAIAP3	BAIAP3	1.68312	5.54163	214.573	1.12745e-16	2.02132e-14	clusterOTP+ neurons_vs_others	OTP+ neurons
SNHG142	SNHG14	1.17752	11.5077	213.189	1.24539e-16	2.21044e-14	clusterOTP+ neurons_vs_others	OTP+ neurons
KCNMA1-AS1	KCNMA1-AS1	2.8236	4.82828	224.52	1.53053e-16	2.66327e-14	clusterOTP+ neurons_vs_others	OTP+ neurons
SYTL5	SYTL5	3.43698	3.46369	209.814	1.59093e-16	2.74149e-14	clusterOTP+ neurons_vs_others	OTP+ neurons
EML6	EML6	2.3267	7.38339	350.577	1.68345e-16	2.87304e-14	clusterOTP+ neurons_vs_others	OTP+ neurons
PCNX2	PCNX2	1.18024	8.32967	208.233	1.78651e-16	3.01989e-14	clusterOTP+ neurons_vs_others	OTP+ neurons
AC116667.2	AC116667.2	3.94406	3.12178	222.287	2.08948e-16	3.4987e-14	clusterOTP+ neurons_vs_others	OTP+ neurons
LMNTD1	LMNTD1	3.38994	3.88928	218.143	2.75451e-16	4.52684e-14	clusterOTP+ neurons_vs_others	OTP+ neurons
CALM1	CALM1	1.47111	5.89887	200.359	3.21868e-16	5.19348e-14	clusterOTP+ neurons_vs_others	OTP+ neurons
RUNDC3B2	RUNDC3B	1.81181	7.1204	220.605	3.53321e-16	5.64964e-14	clusterOTP+ neurons_vs_others	OTP+ neurons
PALM2-AKAP21	PALM2-AKAP2	1.66321	7.34601	219.604	3.77268e-16	5.97868e-14	clusterOTP+ neurons_vs_others	OTP+ neurons
AL121578.3	AL121578.3	5.02492	2.23992	231.103	4.06105e-16	6.37873e-14	clusterOTP+ neurons_vs_others	OTP+ neurons
CACNB2	CACNB2	1.50441	8.69462	207.297	4.42116e-16	6.88344e-14	clusterOTP+ neurons_vs_others	OTP+ neurons
ADGRB31	ADGRB3	1.40964	10.0722	195.636	4.62552e-16	7.13898e-14	clusterOTP+ neurons_vs_others	OTP+ neurons
TUBB2B2	TUBB2B	1.34709	7.10074	195.522	4.66669e-16	7.14044e-14	clusterOTP+ neurons_vs_others	OTP+ neurons
AC140912.11	AC140912.1	4.05848	3.36604	205.174	6.7433e-16	1.01429e-13	clusterOTP+ neurons_vs_others	OTP+ neurons
PTPRO2	PTPRO	1.30372	7.90482	190.671	6.82774e-16	1.01837e-13	clusterOTP+ neurons_vs_others	OTP+ neurons
GABRA3	GABRA3	1.54124	6.73044	189.559	7.45849e-16	1.10317e-13	clusterOTP+ neurons_vs_others	OTP+ neurons
DTNA	DTNA	1.34925	8.58789	188.89	7.86727e-16	1.15402e-13	clusterOTP+ neurons_vs_others	OTP+ neurons
DIRAS21	DIRAS2	2.30948	4.56427	184.222	1.14695e-15	1.66863e-13	clusterOTP+ neurons_vs_others	OTP+ neurons
SYT13	SYT13	3.74135	3.72729	196.122	1.29737e-15	1.87211e-13	clusterOTP+ neurons_vs_others	OTP+ neurons
NEBL	NEBL	1.22284	8.66811	180.337	1.57946e-15	2.2608e-13	clusterOTP+ neurons_vs_others	OTP+ neurons
LINC00623	LINC00623	1.32467	6.0055	179.521	1.69049e-15	2.40036e-13	clusterOTP+ neurons_vs_others	OTP+ neurons
XKR42	XKR4	1.56904	8.71266	194.514	1.79859e-15	2.53359e-13	clusterOTP+ neurons_vs_others	OTP+ neurons
MAP1LC3A2	MAP1LC3A	1.28231	6.82994	178.266	1.87759e-15	2.62405e-13	clusterOTP+ neurons_vs_others	OTP+ neurons
RTN12	RTN1	1.06492	8.48841	177.476	2.00651e-15	2.78231e-13	clusterOTP+ neurons_vs_others	OTP+ neurons
SYCP21	SYCP2	1.79995	5.70509	176.689	2.14441e-15	2.95047e-13	clusterOTP+ neurons_vs_others	OTP+ neurons
LZTS1	LZTS1	2.10052	4.84796	176.212	2.23266e-15	3.03865e-13	clusterOTP+ neurons_vs_others	OTP+ neurons
HS3ST1	HS3ST1	4.11154	2.54161	188.815	2.24274e-15	3.03865e-13	clusterOTP+ neurons_vs_others	OTP+ neurons
KLHL13	KLHL13	1.78171	6.71722	213.78	2.6623e-15	3.57978e-13	clusterOTP+ neurons_vs_others	OTP+ neurons
NAV11	NAV1	1.31731	7.51283	173.465	2.82211e-15	3.76614e-13	clusterOTP+ neurons_vs_others	OTP+ neurons
ATCAY2	ATCAY	1.50573	6.44518	172.37	3.10102e-15	4.10747e-13	clusterOTP+ neurons_vs_others	OTP+ neurons
SHC41	SHC4	1.78851	5.81174	171.422	3.366e-15	4.42542e-13	clusterOTP+ neurons_vs_others	OTP+ neurons
UCHL11	UCHL1	1.46941	6.81745	172.46	3.49464e-15	4.56076e-13	clusterOTP+ neurons_vs_others	OTP+ neurons
NBEA	NBEA	1.10117	9.5096	170.891	3.52473e-15	4.56646e-13	clusterOTP+ neurons_vs_others	OTP+ neurons
ZFHX3	ZFHX3	1.53674	8.55671	198.654	3.70721e-15	4.76806e-13	clusterOTP+ neurons_vs_others	OTP+ neurons
SMPD31	SMPD3	2.80854	5.4122	180.85	4.15943e-15	5.3112e-13	clusterOTP+ neurons_vs_others	OTP+ neurons
BSCL2	BSCL2	1.83887	5.37407	167.747	4.64224e-15	5.84363e-13	clusterOTP+ neurons_vs_others	OTP+ neurons
RIMS12	RIMS1	1.29469	8.44793	167.435	4.77194e-15	5.96459e-13	clusterOTP+ neurons_vs_others	OTP+ neurons
GAP43	GAP43	3.26911	7.88506	383.87	4.91225e-15	6.09704e-13	clusterOTP+ neurons_vs_others	OTP+ neurons
CDH22	CDH22	3.40146	3.54545	178.33	5.08167e-15	6.22031e-13	clusterOTP+ neurons_vs_others	OTP+ neurons
AC022433.11	AC022433.1	2.37427	7.53761	257.079	5.32772e-15	6.47683e-13	clusterOTP+ neurons_vs_others	OTP+ neurons
PLD3	PLD3	1.13456	7.61009	165.794	5.52026e-15	6.66525e-13	clusterOTP+ neurons_vs_others	OTP+ neurons
Z94057.1	Z94057.1	4.07544	2.89711	175.424	6.42079e-15	7.68798e-13	clusterOTP+ neurons_vs_others	OTP+ neurons
CELF31	CELF3	2.09816	5.23413	164.049	6.45394e-15	7.68798e-13	clusterOTP+ neurons_vs_others	OTP+ neurons
CHGA1	CHGA	3.52354	4.12634	174.577	6.8781e-15	8.13863e-13	clusterOTP+ neurons_vs_others	OTP+ neurons
SIDT1	SIDT1	2.8123	4.35263	185.727	7.64117e-15	8.98167e-13	clusterOTP+ neurons_vs_others	OTP+ neurons
CD241	CD24	2.69255	4.46662	160.863	8.61508e-15	1.00598e-12	clusterOTP+ neurons_vs_others	OTP+ neurons
GAD21	GAD2	4.02818	6.94372	424.253	9.96249e-15	1.15571e-12	clusterOTP+ neurons_vs_others	OTP+ neurons
PAK51	PAK5	1.28069	7.21031	158.746	1.04652e-14	1.20614e-12	clusterOTP+ neurons_vs_others	OTP+ neurons
CALN11	CALN1	1.54233	6.64045	170.416	1.07024e-14	1.22553e-12	clusterOTP+ neurons_vs_others	OTP+ neurons
AHI1	AHI1	1.21547	9.27317	157.576	1.16636e-14	1.32703e-12	clusterOTP+ neurons_vs_others	OTP+ neurons
AC116666.1	AC116666.1	2.23962	4.8806	157.294	1.19727e-14	1.35045e-12	clusterOTP+ neurons_vs_others	OTP+ neurons
ACP5	ACP5	5.8686	1.6414	196.88	1.20216e-14	1.35045e-12	clusterOTP+ neurons_vs_others	OTP+ neurons
SYT16	SYT16	1.46069	7.05904	170.199	1.24205e-14	1.38649e-12	clusterOTP+ neurons_vs_others	OTP+ neurons
KCNB2	KCNB2	1.87299	8.31701	229.29	1.31642e-14	1.46033e-12	clusterOTP+ neurons_vs_others	OTP+ neurons
KCNT2	KCNT2	1.00023	8.28075	155.37	1.4335e-14	1.58033e-12	clusterOTP+ neurons_vs_others	OTP+ neurons
GCK	GCK	3.24235	3.94431	164.874	1.54417e-14	1.69182e-12	clusterOTP+ neurons_vs_others	OTP+ neurons
SLC6A171	SLC6A17	3.26265	3.80877	164.408	1.60695e-14	1.74226e-12	clusterOTP+ neurons_vs_others	OTP+ neurons
AC006369.1	AC006369.1	1.79078	4.91068	154.14	1.60984e-14	1.74226e-12	clusterOTP+ neurons_vs_others	OTP+ neurons
HECW12	HECW1	1.65674	6.42561	153.972	1.6356e-14	1.75652e-12	clusterOTP+ neurons_vs_others	OTP+ neurons
NALCN1	NALCN	2.20925	7.47952	258.521	1.64281e-14	1.75652e-12	clusterOTP+ neurons_vs_others	OTP+ neurons
STMN22	STMN2	2.3483	8.91605	284.113	1.7904e-14	1.90163e-12	clusterOTP+ neurons_vs_others	OTP+ neurons
AC092114.1	AC092114.1	2.79315	3.66313	152.576	1.86783e-14	1.96166e-12	clusterOTP+ neurons_vs_others	OTP+ neurons
AL356124.1	AL356124.1	2.56897	3.9851	153.568	1.90267e-14	1.97911e-12	clusterOTP+ neurons_vs_others	OTP+ neurons
FRY-AS1	FRY-AS1	2.40077	4.12441	152.306	1.91653e-14	1.97911e-12	clusterOTP+ neurons_vs_others	OTP+ neurons
PPP1R1C1	PPP1R1C	1.62561	5.37752	152.299	1.91789e-14	1.97911e-12	clusterOTP+ neurons_vs_others	OTP+ neurons
KSR2	KSR2	1.54891	7.14622	176.048	1.97256e-14	2.02376e-12	clusterOTP+ neurons_vs_others	OTP+ neurons
AC010327.4	AC010327.4	2.8231	4.85248	161.751	2.02028e-14	2.0608e-12	clusterOTP+ neurons_vs_others	OTP+ neurons
AC008852.1	AC008852.1	3.81629	3.02801	172.328	2.29321e-14	2.31262e-12	clusterOTP+ neurons_vs_others	OTP+ neurons
FRMD31	FRMD3	1.22253	6.71975	150.321	2.31939e-14	2.32581e-12	clusterOTP+ neurons_vs_others	OTP+ neurons
CELF6	CELF6	1.84209	5.2782	149.862	2.42453e-14	2.41759e-12	clusterOTP+ neurons_vs_others	OTP+ neurons
AC073525.1	AC073525.1	3.78363	3.28042	159.177	2.5297e-14	2.50836e-12	clusterOTP+ neurons_vs_others	OTP+ neurons
FGF141	FGF14	1.92374	8.64422	227.961	2.57483e-14	2.53892e-12	clusterOTP+ neurons_vs_others	OTP+ neurons
ADGRL41	ADGRL4	2.61831	3.79026	150.356	2.66126e-14	2.6071e-12	clusterOTP+ neurons_vs_others	OTP+ neurons
RAB3C	RAB3C	2.41369	8.23008	289.292	2.67335e-14	2.6071e-12	clusterOTP+ neurons_vs_others	OTP+ neurons
AL589765.1	AL589765.1	1.64499	6.17102	148.665	2.72361e-14	2.64161e-12	clusterOTP+ neurons_vs_others	OTP+ neurons
CACNB4	CACNB4	1.23254	6.55627	148.327	2.81492e-14	2.71533e-12	clusterOTP+ neurons_vs_others	OTP+ neurons
CDKN2D	CDKN2D	3.53444	3.80295	157.83	2.84886e-14	2.72806e-12	clusterOTP+ neurons_vs_others	OTP+ neurons
CNTNAP4	CNTNAP4	3.26698	7.79587	385.206	2.85886e-14	2.72806e-12	clusterOTP+ neurons_vs_others	OTP+ neurons
ECEL1	ECEL1	2.50289	5.64315	205.523	2.89179e-14	2.74472e-12	clusterOTP+ neurons_vs_others	OTP+ neurons
ATP6V0C1	ATP6V0C	2.37408	4.27913	147.714	2.98892e-14	2.82183e-12	clusterOTP+ neurons_vs_others	OTP+ neurons
TMTC1	TMTC1	2.63966	5.31061	231.388	3.26738e-14	3.0684e-12	clusterOTP+ neurons_vs_others	OTP+ neurons
MTSS1	MTSS1	1.12668	7.72298	146.749	3.28634e-14	3.06996e-12	clusterOTP+ neurons_vs_others	OTP+ neurons
MIR124-2HG2	MIR124-2HG	2.10644	4.77141	145.608	3.67837e-14	3.41819e-12	clusterOTP+ neurons_vs_others	OTP+ neurons
FRMD4A	FRMD4A	0.975411	9.60243	144.484	4.11334e-14	3.78278e-12	clusterOTP+ neurons_vs_others	OTP+ neurons
NEK10	NEK10	1.51786	5.90532	145.305	4.20199e-14	3.84439e-12	clusterOTP+ neurons_vs_others	OTP+ neurons
DLGAP22	DLGAP2	2.32264	8.4938	261.774	4.42225e-14	4.00462e-12	clusterOTP+ neurons_vs_others	OTP+ neurons
CTNNA22	CTNNA2	1.01329	10.5552	143.549	4.51667e-14	4.06936e-12	clusterOTP+ neurons_vs_others	OTP+ neurons
ABCB11	ABCB1	1.81655	6.56555	172.086	5.10265e-14	4.57408e-12	clusterOTP+ neurons_vs_others	OTP+ neurons
SLC4A8	SLC4A8	1.26533	6.95607	142.196	5.17564e-14	4.61621e-12	clusterOTP+ neurons_vs_others	OTP+ neurons
SRRM43	SRRM4	1.50613	7.86782	155.961	5.24016e-14	4.65038e-12	clusterOTP+ neurons_vs_others	OTP+ neurons
BEX1	BEX1	1.64776	5.55108	141.88	5.34386e-14	4.71882e-12	clusterOTP+ neurons_vs_others	OTP+ neurons
CALY	CALY	3.52398	5.50678	250.474	5.62118e-14	4.93912e-12	clusterOTP+ neurons_vs_others	OTP+ neurons
FAM133A	FAM133A	1.81527	4.62971	140.448	6.18144e-14	5.40465e-12	clusterOTP+ neurons_vs_others	OTP+ neurons
TMEM132B	TMEM132B	2.44627	7.86241	281.88	6.22682e-14	5.41764e-12	clusterOTP+ neurons_vs_others	OTP+ neurons
SCG21	SCG2	4.51577	7.52043	419.482	6.44887e-14	5.58347e-12	clusterOTP+ neurons_vs_others	OTP+ neurons
CPNE71	CPNE7	3.62839	3.55632	159.11	6.67349e-14	5.74989e-12	clusterOTP+ neurons_vs_others	OTP+ neurons
CACNG2	CACNG2	2.29433	4.10498	139.499	6.81159e-14	5.84053e-12	clusterOTP+ neurons_vs_others	OTP+ neurons
ANK31	ANK3	1.87204	9.70511	217.384	6.89502e-14	5.88364e-12	clusterOTP+ neurons_vs_others	OTP+ neurons
C4orf481	C4orf48	1.85272	5.15108	139.281	6.96592e-14	5.91194e-12	clusterOTP+ neurons_vs_others	OTP+ neurons
ABLIM1	ABLIM1	1.22877	7.73026	139.241	6.9948e-14	5.91194e-12	clusterOTP+ neurons_vs_others	OTP+ neurons
CELF51	CELF5	1.17489	7.22904	138.975	7.18866e-14	6.04699e-12	clusterOTP+ neurons_vs_others	OTP+ neurons
GNAO11	GNAO1	1.1571	6.85017	138.565	7.49908e-14	6.277e-12	clusterOTP+ neurons_vs_others	OTP+ neurons
MAGEL2	MAGEL2	2.69001	3.85737	138.521	7.53282e-14	6.277e-12	clusterOTP+ neurons_vs_others	OTP+ neurons
POMC2	POMC	5.62348	6.20462	2010.02	1.21037e-31	2.14828e-27	clusterPOMC+ neurons_vs_others	POMC+ neurons
GRIA24	GRIA2	2.92822	8.49309	1271.06	1.6083e-29	1.42729e-25	clusterPOMC+ neurons_vs_others	POMC+ neurons
AL445623.21	AL445623.2	2.96656	6.65525	926.057	3.85696e-27	2.2819e-23	clusterPOMC+ neurons_vs_others	POMC+ neurons
ISL14	ISL1	3.27996	7.32989	819.357	3.15786e-26	1.40122e-22	clusterPOMC+ neurons_vs_others	POMC+ neurons
TUBB2A3	TUBB2A	3.63534	6.56411	738.285	1.87515e-25	6.65642e-22	clusterPOMC+ neurons_vs_others	POMC+ neurons
TUBB2B3	TUBB2B	2.26094	7.10074	646.93	1.77262e-24	5.2437e-21	clusterPOMC+ neurons_vs_others	POMC+ neurons
PRDM121	PRDM12	5.05234	4.16494	716.786	2.6591e-24	6.74233e-21	clusterPOMC+ neurons_vs_others	POMC+ neurons
CHGB3	CHGB	4.4701	6.36674	701.542	3.76015e-24	8.34235e-21	clusterPOMC+ neurons_vs_others	POMC+ neurons
KCNC23	KCNC2	3.88963	6.00837	594.194	7.46834e-24	1.47284e-20	clusterPOMC+ neurons_vs_others	POMC+ neurons
PTPRN4	PTPRN	4.14183	6.49945	633.043	1.96031e-23	3.47935e-20	clusterPOMC+ neurons_vs_others	POMC+ neurons
MIR7-3HG3	MIR7-3HG	2.88937	6.62749	546.534	3.05156e-23	4.92382e-20	clusterPOMC+ neurons_vs_others	POMC+ neurons
L1CAM4	L1CAM	3.24066	5.76138	508.599	1.01873e-22	1.50679e-19	clusterPOMC+ neurons_vs_others	POMC+ neurons
MYT1L3	MYT1L	2.93469	7.72063	503.494	1.20584e-22	1.64634e-19	clusterPOMC+ neurons_vs_others	POMC+ neurons
ZPBP	ZPBP	2.95267	5.67663	526.84	1.62391e-22	2.05877e-19	clusterPOMC+ neurons_vs_others	POMC+ neurons
SCN2A3	SCN2A	2.4948	6.98268	480.194	2.65823e-22	3.1454e-19	clusterPOMC+ neurons_vs_others	POMC+ neurons
PTGER31	PTGER3	4.73963	4.09102	452.581	7.11461e-22	7.3096e-19	clusterPOMC+ neurons_vs_others	POMC+ neurons
SCG33	SCG3	2.90966	6.54989	452.004	7.26673e-22	7.3096e-19	clusterPOMC+ neurons_vs_others	POMC+ neurons
AC125613.11	AC125613.1	2.05277	10.0238	451.462	7.41297e-22	7.3096e-19	clusterPOMC+ neurons_vs_others	POMC+ neurons
CELF43	CELF4	1.91255	7.99406	440.664	1.10717e-21	1.03428e-18	clusterPOMC+ neurons_vs_others	POMC+ neurons
SCN9A2	SCN9A	2.08162	7.92099	431.976	1.53924e-21	1.366e-18	clusterPOMC+ neurons_vs_others	POMC+ neurons
PLD51	PLD5	2.30999	7.31698	484.368	1.67097e-21	1.41229e-18	clusterPOMC+ neurons_vs_others	POMC+ neurons
AC068308.11	AC068308.1	2.25215	9.09627	479.972	1.92814e-21	1.55557e-18	clusterPOMC+ neurons_vs_others	POMC+ neurons
TMEM59L3	TMEM59L	2.68277	6.69364	421.616	2.29848e-21	1.77373e-18	clusterPOMC+ neurons_vs_others	POMC+ neurons
MAPT3	MAPT	2.23896	7.40635	412.627	3.27925e-21	2.42514e-18	clusterPOMC+ neurons_vs_others	POMC+ neurons
INA3	INA	3.70734	5.54666	443.264	5.61631e-21	3.98736e-18	clusterPOMC+ neurons_vs_others	POMC+ neurons
TSPAN73	TSPAN7	2.57511	6.56987	390.853	7.99563e-21	5.45825e-18	clusterPOMC+ neurons_vs_others	POMC+ neurons
ATP1A33	ATP1A3	2.80442	6.23528	369.02	2.04835e-20	1.34652e-17	clusterPOMC+ neurons_vs_others	POMC+ neurons
SVOP4	SVOP	3.08083	6.03295	404.231	2.37696e-20	1.50674e-17	clusterPOMC+ neurons_vs_others	POMC+ neurons
ZCCHC122	ZCCHC12	4.26604	5.64759	450.85	2.57402e-20	1.57539e-17	clusterPOMC+ neurons_vs_others	POMC+ neurons
MLLT113	MLLT11	2.47927	5.5291	360.897	2.94496e-20	1.74233e-17	clusterPOMC+ neurons_vs_others	POMC+ neurons
SYT54	SYT5	3.47908	5.86836	395.724	3.31132e-20	1.89589e-17	clusterPOMC+ neurons_vs_others	POMC+ neurons
SOX2-OT1	SOX2-OT	2.13119	10.721	411.472	4.05722e-20	2.25036e-17	clusterPOMC+ neurons_vs_others	POMC+ neurons
TUBA1A1	TUBA1A	1.72099	9.07201	342.356	6.94142e-20	3.64752e-17	clusterPOMC+ neurons_vs_others	POMC+ neurons
ELAVL2	ELAVL2	3.03396	7.55615	654.877	6.98719e-20	3.64752e-17	clusterPOMC+ neurons_vs_others	POMC+ neurons
STMN43	STMN4	3.53481	5.73193	370.983	9.02757e-20	4.57801e-17	clusterPOMC+ neurons_vs_others	POMC+ neurons
SCG53	SCG5	2.44273	6.59949	338.806	1.06744e-19	5.26278e-17	clusterPOMC+ neurons_vs_others	POMC+ neurons
TTC9B2	TTC9B	3.80307	5.06058	348.261	2.39776e-19	1.15021e-16	clusterPOMC+ neurons_vs_others	POMC+ neurons
CALM11	CALM1	1.77543	5.89887	310.594	3.34254e-19	1.56123e-16	clusterPOMC+ neurons_vs_others	POMC+ neurons
PALM2-AKAP22	PALM2-AKAP2	2.04172	7.34601	352.119	3.48536e-19	1.5862e-16	clusterPOMC+ neurons_vs_others	POMC+ neurons
GAB21	GAB2	1.48812	8.44419	304.984	4.47863e-19	1.98728e-16	clusterPOMC+ neurons_vs_others	POMC+ neurons
SYP3	SYP	2.0015	6.51079	301.454	5.39757e-19	2.33662e-16	clusterPOMC+ neurons_vs_others	POMC+ neurons
TRPC5OS2	TRPC5OS	3.37671	5.54153	302.01	6.20111e-19	2.62056e-16	clusterPOMC+ neurons_vs_others	POMC+ neurons
DSCAM3	DSCAM	2.73738	8.90315	448.63	8.66951e-19	3.44907e-16	clusterPOMC+ neurons_vs_others	POMC+ neurons
SCN3B3	SCN3B	2.39917	5.50059	292.496	8.74462e-19	3.44907e-16	clusterPOMC+ neurons_vs_others	POMC+ neurons
RTN13	RTN1	1.32743	8.48841	287.98	1.12087e-18	4.32484e-16	clusterPOMC+ neurons_vs_others	POMC+ neurons
NEFM1	NEFM	2.84509	4.70194	268.322	3.44484e-18	1.2738e-15	clusterPOMC+ neurons_vs_others	POMC+ neurons
SRRM44	SRRM4	1.98746	7.86782	295.236	5.86227e-18	2.12346e-15	clusterPOMC+ neurons_vs_others	POMC+ neurons
ABLIM33	ABLIM3	2.66667	4.8329	258.311	6.27778e-18	2.22849e-15	clusterPOMC+ neurons_vs_others	POMC+ neurons
AC016642.13	AC016642.1	1.84692	7.21349	257.557	6.57347e-18	2.26113e-15	clusterPOMC+ neurons_vs_others	POMC+ neurons
PTPRO3	PTPRO	1.49035	7.90482	257.431	6.62452e-18	2.26113e-15	clusterPOMC+ neurons_vs_others	POMC+ neurons
KIF21A	KIF21A	1.48478	7.81159	256.649	6.9494e-18	2.32726e-15	clusterPOMC+ neurons_vs_others	POMC+ neurons
EEF1A22	EEF1A2	3.44713	4.89468	278.646	7.20363e-18	2.36773e-15	clusterPOMC+ neurons_vs_others	POMC+ neurons
CTNNA23	CTNNA2	1.31256	10.5552	252.952	8.73035e-18	2.81736e-15	clusterPOMC+ neurons_vs_others	POMC+ neurons
KIF5C3	KIF5C	1.45155	8.35377	250.439	1.0212e-17	3.23667e-15	clusterPOMC+ neurons_vs_others	POMC+ neurons
NRXN13	NRXN1	1.50897	10.3576	247.463	1.23172e-17	3.8354e-15	clusterPOMC+ neurons_vs_others	POMC+ neurons
MARCH42	MARCH4	2.41278	6.31068	268.433	1.30883e-17	4.00526e-15	clusterPOMC+ neurons_vs_others	POMC+ neurons
NPM22	NPM2	3.41596	5.22243	263.791	1.64274e-17	4.94185e-15	clusterPOMC+ neurons_vs_others	POMC+ neurons
SNCG1	SNCG	3.99139	3.83488	260.919	1.93576e-17	5.7263e-15	clusterPOMC+ neurons_vs_others	POMC+ neurons
AC022433.12	AC022433.1	2.8475	7.53761	401.012	2.5012e-17	7.27767e-15	clusterPOMC+ neurons_vs_others	POMC+ neurons
PGRMC12	PGRMC1	1.85762	6.11283	235.051	2.75128e-17	7.87621e-15	clusterPOMC+ neurons_vs_others	POMC+ neurons
SERPINE22	SERPINE2	2.2239	6.33646	279.321	2.91386e-17	8.20922e-15	clusterPOMC+ neurons_vs_others	POMC+ neurons
PAK52	PAK5	1.51987	7.21031	232.616	3.23506e-17	8.97174e-15	clusterPOMC+ neurons_vs_others	POMC+ neurons
TMOD11	TMOD1	2.60332	4.49426	230.145	3.8188e-17	1.02697e-14	clusterPOMC+ neurons_vs_others	POMC+ neurons
XKR43	XKR4	1.75945	8.71266	251.612	4.25711e-17	1.12775e-14	clusterPOMC+ neurons_vs_others	POMC+ neurons
STMN23	STMN2	2.94813	8.91605	485.45	5.23626e-17	1.36674e-14	clusterPOMC+ neurons_vs_others	POMC+ neurons
ABLIM11	ABLIM1	1.49995	7.73026	216.795	9.62101e-17	2.47483e-14	clusterPOMC+ neurons_vs_others	POMC+ neurons
GNAO12	GNAO1	1.41061	6.85017	216.038	1.0154e-16	2.57461e-14	clusterPOMC+ neurons_vs_others	POMC+ neurons
MAP1LC3A3	MAP1LC3A	1.39218	6.82994	213.978	1.17659e-16	2.94131e-14	clusterPOMC+ neurons_vs_others	POMC+ neurons
RGS73	RGS7	1.97023	8.06806	273.858	1.29351e-16	3.16084e-14	clusterPOMC+ neurons_vs_others	POMC+ neurons
ST8SIA32	ST8SIA3	3.09638	5.02156	229.564	1.30003e-16	3.16084e-14	clusterPOMC+ neurons_vs_others	POMC+ neurons
ATCAY3	ATCAY	1.64088	6.44518	209.989	1.57079e-16	3.76756e-14	clusterPOMC+ neurons_vs_others	POMC+ neurons
IQSEC34	IQSEC3	2.75241	5.83217	224.687	1.78415e-16	4.22224e-14	clusterPOMC+ neurons_vs_others	POMC+ neurons
OLFM1	OLFM1	3.01781	3.65317	206.887	1.97294e-16	4.60759e-14	clusterPOMC+ neurons_vs_others	POMC+ neurons
SPOCK22	SPOCK2	3.40629	4.41233	222.607	2.04573e-16	4.71554e-14	clusterPOMC+ neurons_vs_others	POMC+ neurons
ADAM221	ADAM22	1.31063	7.34822	206.05	2.09909e-16	4.77651e-14	clusterPOMC+ neurons_vs_others	POMC+ neurons
TUBB31	TUBB3	2.27327	7.73542	320.072	3.65819e-16	8.21888e-14	clusterPOMC+ neurons_vs_others	POMC+ neurons
HECW13	HECW1	1.83282	6.42561	197.082	4.13613e-16	9.17652e-14	clusterPOMC+ neurons_vs_others	POMC+ neurons
PPFIA2-AS12	PPFIA2-AS1	1.53879	6.84687	196.498	4.32697e-16	9.48141e-14	clusterPOMC+ neurons_vs_others	POMC+ neurons
CDKN2D1	CDKN2D	3.86554	3.80295	211.237	4.41082e-16	9.54728e-14	clusterPOMC+ neurons_vs_others	POMC+ neurons
VAT1L3	VAT1L	1.65947	8.43391	221.45	4.57349e-16	9.7801e-14	clusterPOMC+ neurons_vs_others	POMC+ neurons
RAB6B1	RAB6B	1.89072	4.90785	191.259	6.51713e-16	1.37705e-13	clusterPOMC+ neurons_vs_others	POMC+ neurons
UBE3A3	UBE3A	1.15021	9.86769	190.76	6.77932e-16	1.4156e-13	clusterPOMC+ neurons_vs_others	POMC+ neurons
CSRNP3	CSRNP3	1.21242	8.94608	189.072	7.75377e-16	1.60025e-13	clusterPOMC+ neurons_vs_others	POMC+ neurons
DCX2	DCX	1.71341	8.60479	222.834	8.45575e-16	1.72507e-13	clusterPOMC+ neurons_vs_others	POMC+ neurons
SDC3	SDC3	3.43035	3.80549	201.808	8.57586e-16	1.72969e-13	clusterPOMC+ neurons_vs_others	POMC+ neurons
SYCP22	SYCP2	1.84062	5.70509	186.521	9.51681e-16	1.89791e-13	clusterPOMC+ neurons_vs_others	POMC+ neurons
C4orf482	C4orf48	2.07995	5.15108	184.578	1.1142e-15	2.17625e-13	clusterPOMC+ neurons_vs_others	POMC+ neurons
AC069228.13	AC069228.1	1.46045	8.45053	186.264	1.11577e-15	2.17625e-13	clusterPOMC+ neurons_vs_others	POMC+ neurons
ADGRB32	ADGRB3	1.37258	10.0722	184.006	1.16744e-15	2.25227e-13	clusterPOMC+ neurons_vs_others	POMC+ neurons
UCHL12	UCHL1	1.51519	6.81745	184.581	1.27312e-15	2.42974e-13	clusterPOMC+ neurons_vs_others	POMC+ neurons
LANCL3	LANCL3	3.03914	3.97975	191.686	1.33026e-15	2.51178e-13	clusterPOMC+ neurons_vs_others	POMC+ neurons
ISLR2	ISLR2	2.79605	3.85457	182.203	1.35351e-15	2.52878e-13	clusterPOMC+ neurons_vs_others	POMC+ neurons
PCSK1N	PCSK1N	3.62589	6.4605	404.172	1.55531e-15	2.87555e-13	clusterPOMC+ neurons_vs_others	POMC+ neurons
PTPRE2	PTPRE	1.65786	5.74093	179.729	1.66142e-15	3.04007e-13	clusterPOMC+ neurons_vs_others	POMC+ neurons
AC061961.12	AC061961.1	3.32358	4.79026	192.039	1.75774e-15	3.18349e-13	clusterPOMC+ neurons_vs_others	POMC+ neurons
GABRA22	GABRA2	2.1747	5.97813	202.319	1.81154e-15	3.24779e-13	clusterPOMC+ neurons_vs_others	POMC+ neurons
CACNA1E3	CACNA1E	1.96586	6.68285	181.512	1.95874e-15	3.47656e-13	clusterPOMC+ neurons_vs_others	POMC+ neurons
LINC02223	LINC02223	2.53552	6.72207	301.913	1.98117e-15	3.48156e-13	clusterPOMC+ neurons_vs_others	POMC+ neurons
LINC005993	LINC00599	2.00796	5.58006	176.414	2.19487e-15	3.74584e-13	clusterPOMC+ neurons_vs_others	POMC+ neurons
SLC4A81	SLC4A8	1.39278	6.95607	176.09	2.25599e-15	3.81344e-13	clusterPOMC+ neurons_vs_others	POMC+ neurons
PTPRN23	PTPRN2	1.12454	9.20381	175.942	2.28442e-15	3.81344e-13	clusterPOMC+ neurons_vs_others	POMC+ neurons
ATP8A22	ATP8A2	1.36567	8.09104	175.867	2.29894e-15	3.81344e-13	clusterPOMC+ neurons_vs_others	POMC+ neurons
AC011369.11	AC011369.1	1.61273	6.72569	191.338	2.4447e-15	4.01768e-13	clusterPOMC+ neurons_vs_others	POMC+ neurons
LZTS11	LZTS1	2.09315	4.84796	174.08	2.67721e-15	4.35943e-13	clusterPOMC+ neurons_vs_others	POMC+ neurons
ELAVL32	ELAVL3	1.225	7.08328	173.387	2.84115e-15	4.58432e-13	clusterPOMC+ neurons_vs_others	POMC+ neurons
CHGA2	CHGA	3.58988	4.12634	185.528	2.88595e-15	4.61467e-13	clusterPOMC+ neurons_vs_others	POMC+ neurons
TMSB10	TMSB10	1.25375	7.00111	171.45	3.35799e-15	5.27443e-13	clusterPOMC+ neurons_vs_others	POMC+ neurons
ASTN21	ASTN2	1.23518	7.65639	170.412	3.67477e-15	5.72136e-13	clusterPOMC+ neurons_vs_others	POMC+ neurons
FRY2	FRY	1.30623	8.21307	170.31	3.70753e-15	5.72217e-13	clusterPOMC+ neurons_vs_others	POMC+ neurons
KIF1A1	KIF1A	1.29504	6.75264	169.722	3.90281e-15	5.97164e-13	clusterPOMC+ neurons_vs_others	POMC+ neurons
EDIL31	EDIL3	2.39601	5.9233	260.801	4.43722e-15	6.73129e-13	clusterPOMC+ neurons_vs_others	POMC+ neurons
AC084361.12	AC084361.1	1.77975	6.74798	182.607	4.51561e-15	6.79216e-13	clusterPOMC+ neurons_vs_others	POMC+ neurons
ACTB	ACTB	1.17245	7.40645	167.852	4.59956e-15	6.8603e-13	clusterPOMC+ neurons_vs_others	POMC+ neurons
YWHAH	YWHAH	1.52236	5.63381	166.849	5.02627e-15	7.43427e-13	clusterPOMC+ neurons_vs_others	POMC+ neurons
RUNDC3B3	RUNDC3B	1.67165	7.1204	182.537	5.24617e-15	7.6954e-13	clusterPOMC+ neurons_vs_others	POMC+ neurons
PHACTR33	PHACTR3	1.59247	6.11126	165.841	5.49761e-15	7.99812e-13	clusterPOMC+ neurons_vs_others	POMC+ neurons
PPFIA22	PPFIA2	1.25809	8.50393	165.723	5.5557e-15	8.01691e-13	clusterPOMC+ neurons_vs_others	POMC+ neurons
PLXNA42	PLXNA4	1.4161	6.50402	165.557	5.63841e-15	8.07065e-13	clusterPOMC+ neurons_vs_others	POMC+ neurons
GAP431	GAP43	3.24903	7.88506	377.505	5.80983e-15	8.2495e-13	clusterPOMC+ neurons_vs_others	POMC+ neurons
ATP6V0C2	ATP6V0C	2.46687	4.27913	163.577	6.73399e-15	9.43249e-13	clusterPOMC+ neurons_vs_others	POMC+ neurons
TRIM671	TRIM67	3.59291	3.9018	188.598	6.74926e-15	9.43249e-13	clusterPOMC+ neurons_vs_others	POMC+ neurons
CYSLTR21	CYSLTR2	1.74387	6.10422	169.664	7.78824e-15	1.07995e-12	clusterPOMC+ neurons_vs_others	POMC+ neurons
CDH221	CDH22	3.37595	3.54545	172.426	8.2013e-15	1.12841e-12	clusterPOMC+ neurons_vs_others	POMC+ neurons
RIMS13	RIMS1	1.27164	8.44793	160.383	9.00128e-15	1.22164e-12	clusterPOMC+ neurons_vs_others	POMC+ neurons
AC016885.2	AC016885.2	4.21621	1.92183	171.277	9.01654e-15	1.22164e-12	clusterPOMC+ neurons_vs_others	POMC+ neurons
KIFAP31	KIFAP3	1.18549	7.48354	158.844	1.03704e-14	1.39442e-12	clusterPOMC+ neurons_vs_others	POMC+ neurons
ANK13	ANK1	2.00323	5.53916	158.378	1.08266e-14	1.44111e-12	clusterPOMC+ neurons_vs_others	POMC+ neurons
KCNMA13	KCNMA1	1.94008	7.26517	215.62	1.088e-14	1.44111e-12	clusterPOMC+ neurons_vs_others	POMC+ neurons
C1QTNF4	C1QTNF4	2.49209	4.39483	157.998	1.12148e-14	1.47445e-12	clusterPOMC+ neurons_vs_others	POMC+ neurons
COX6A1	COX6A1	1.44926	5.40798	157.249	1.20236e-14	1.56917e-12	clusterPOMC+ neurons_vs_others	POMC+ neurons
MAGEL21	MAGEL2	2.81656	3.85737	157.071	1.22249e-14	1.58379e-12	clusterPOMC+ neurons_vs_others	POMC+ neurons
DPYSL2	DPYSL2	1.22457	8.1544	156.852	1.24763e-14	1.60465e-12	clusterPOMC+ neurons_vs_others	POMC+ neurons
CD242	CD24	2.67264	4.46662	156.728	1.26213e-14	1.61163e-12	clusterPOMC+ neurons_vs_others	POMC+ neurons
FGF142	FGF14	1.9705	8.64422	240.467	1.3814e-14	1.74038e-12	clusterPOMC+ neurons_vs_others	POMC+ neurons
KIDINS220	KIDINS220	1.02712	8.3341	155.755	1.38257e-14	1.74038e-12	clusterPOMC+ neurons_vs_others	POMC+ neurons
ARHGAP181	ARHGAP18	1.62003	5.58446	154.574	1.54512e-14	1.93129e-12	clusterPOMC+ neurons_vs_others	POMC+ neurons
PPP1R1A	PPP1R1A	3.45117	3.52074	162.995	1.81425e-14	2.25182e-12	clusterPOMC+ neurons_vs_others	POMC+ neurons
AP001605.12	AP001605.1	2.97999	4.94923	162.805	1.84415e-14	2.27304e-12	clusterPOMC+ neurons_vs_others	POMC+ neurons
GNAS2	GNAS	1.09255	9.53275	152.5	1.88149e-14	2.30308e-12	clusterPOMC+ neurons_vs_others	POMC+ neurons
TNR2	TNR	3.43645	5.84646	251.184	1.90258e-14	2.31294e-12	clusterPOMC+ neurons_vs_others	POMC+ neurons
ANKRD44	ANKRD44	1.37499	8.45292	164.245	2.09084e-14	2.52451e-12	clusterPOMC+ neurons_vs_others	POMC+ neurons
GCK1	GCK	3.21684	3.94431	160.043	2.34451e-14	2.7928e-12	clusterPOMC+ neurons_vs_others	POMC+ neurons
NSG1	NSG1	3.33764	4.99235	185.33	2.37011e-14	2.80447e-12	clusterPOMC+ neurons_vs_others	POMC+ neurons
AL445123.2	AL445123.2	2.9367	5.2306	254.696	2.79904e-14	3.29008e-12	clusterPOMC+ neurons_vs_others	POMC+ neurons
ACTG1	ACTG1	1.05471	7.53853	146.059	3.51772e-14	4.10763e-12	clusterPOMC+ neurons_vs_others	POMC+ neurons
AC069155.11	AC069155.1	2.17323	4.95188	144.919	4.15039e-14	4.80853e-12	clusterPOMC+ neurons_vs_others	POMC+ neurons
ELAVL4	ELAVL4	3.37544	7.39415	353.688	4.19061e-14	4.80853e-12	clusterPOMC+ neurons_vs_others	POMC+ neurons
UBC	UBC	1.15264	6.28146	144.277	4.19924e-14	4.80853e-12	clusterPOMC+ neurons_vs_others	POMC+ neurons
CPEB1-AS1	CPEB1-AS1	1.4537	5.42993	143.352	4.6067e-14	5.20792e-12	clusterPOMC+ neurons_vs_others	POMC+ neurons
NDN	NDN	1.85726	4.92132	142.626	4.95621e-14	5.56758e-12	clusterPOMC+ neurons_vs_others	POMC+ neurons
KIF5A	KIF5A	1.17115	6.68507	142.013	5.27259e-14	5.84895e-12	clusterPOMC+ neurons_vs_others	POMC+ neurons
SARAF	SARAF	1.19114	7.18301	141.733	5.42388e-14	5.97941e-12	clusterPOMC+ neurons_vs_others	POMC+ neurons
ACHE	ACHE	3.93313	3.4037	174.421	5.71428e-14	6.26067e-12	clusterPOMC+ neurons_vs_others	POMC+ neurons
NEFL1	NEFL	3.47401	4.60737	149.073	7.85939e-14	8.50588e-12	clusterPOMC+ neurons_vs_others	POMC+ neurons
LINC016301	LINC01630	2.38967	4.04146	137.481	8.38939e-14	9.02444e-12	clusterPOMC+ neurons_vs_others	POMC+ neurons
ABCB12	ABCB1	1.78284	6.56555	164.515	9.11335e-14	9.74415e-12	clusterPOMC+ neurons_vs_others	POMC+ neurons
XPR1	XPR1	1.13185	8.86445	135.672	1.01324e-13	1.07689e-11	clusterPOMC+ neurons_vs_others	POMC+ neurons
STXBP5-AS13	STXBP5-AS1	1.43994	7.3449	141.668	1.17187e-13	1.23086e-11	clusterPOMC+ neurons_vs_others	POMC+ neurons
SGCD1	SGCD	1.76322	7.74433	194.563	1.17198e-13	1.23086e-11	clusterPOMC+ neurons_vs_others	POMC+ neurons
NALCN2	NALCN	2.05042	7.47952	216.469	1.1845e-13	1.23669e-11	clusterPOMC+ neurons_vs_others	POMC+ neurons
ANK32	ANK3	1.82005	9.70511	204.231	1.39478e-13	1.44772e-11	clusterPOMC+ neurons_vs_others	POMC+ neurons
ARL6IP5	ARL6IP5	1.55752	4.72697	132.389	1.43471e-13	1.4805e-11	clusterPOMC+ neurons_vs_others	POMC+ neurons
VAT11	VAT1	2.48805	3.8603	132.28	1.45162e-13	1.4893e-11	clusterPOMC+ neurons_vs_others	POMC+ neurons
KIF21B1	KIF21B	1.77234	5.05047	130.735	1.71404e-13	1.74842e-11	clusterPOMC+ neurons_vs_others	POMC+ neurons
CNTNAP41	CNTNAP4	3.01319	7.79587	314.629	1.84754e-13	1.87383e-11	clusterPOMC+ neurons_vs_others	POMC+ neurons
PRKCE1	PRKCE	1.24455	7.36875	130.185	2.13727e-13	2.13115e-11	clusterPOMC+ neurons_vs_others	POMC+ neurons
FTH1	FTH1	1.17033	6.39677	128.553	2.1733e-13	2.15497e-11	clusterPOMC+ neurons_vs_others	POMC+ neurons
PPP1R14B	PPP1R14B	1.60321	4.47199	128.327	2.22782e-13	2.19676e-11	clusterPOMC+ neurons_vs_others	POMC+ neurons
CPNE72	CPNE7	3.51697	3.55632	144.433	2.39335e-13	2.34694e-11	clusterPOMC+ neurons_vs_others	POMC+ neurons
AC073525.11	AC073525.1	3.59942	3.28042	135.185	2.40903e-13	2.34934e-11	clusterPOMC+ neurons_vs_others	POMC+ neurons
JPT1	JPT1	1.33754	6.55156	127.487	2.44347e-13	2.35934e-11	clusterPOMC+ neurons_vs_others	POMC+ neurons
SMPD32	SMPD3	2.56442	5.4122	135.034	2.44588e-13	2.35934e-11	clusterPOMC+ neurons_vs_others	POMC+ neurons
PAFAH1B3	PAFAH1B3	1.20943	5.78748	126.315	2.78178e-13	2.66886e-11	clusterPOMC+ neurons_vs_others	POMC+ neurons
ITGA6	ITGA6	1.38487	6.07392	127.007	2.94823e-13	2.81334e-11	clusterPOMC+ neurons_vs_others	POMC+ neurons
AC010327.41	AC010327.4	2.65592	4.85248	132.636	3.11868e-13	2.96008e-11	clusterPOMC+ neurons_vs_others	POMC+ neurons
DPYSL31	DPYSL3	1.23003	7.10474	124.895	3.25911e-13	3.06064e-11	clusterPOMC+ neurons_vs_others	POMC+ neurons
CXADR	CXADR	1.10477	7.11338	124.264	3.49806e-13	3.26774e-11	clusterPOMC+ neurons_vs_others	POMC+ neurons
MVD	MVD	1.39565	5.52417	124.175	3.53346e-13	3.27342e-11	clusterPOMC+ neurons_vs_others	POMC+ neurons
SYT131	SYT13	3.30575	3.72729	130.938	3.7122e-13	3.41387e-11	clusterPOMC+ neurons_vs_others	POMC+ neurons
ROBO22	ROBO2	1.57019	9.50682	166.626	3.9337e-13	3.59893e-11	clusterPOMC+ neurons_vs_others	POMC+ neurons
OPTN	OPTN	1.53194	5.54808	122.109	4.46545e-13	4.06448e-11	clusterPOMC+ neurons_vs_others	POMC+ neurons
RGS4	RGS4	4.2235	2.05034	137.505	4.54169e-13	4.11278e-11	clusterPOMC+ neurons_vs_others	POMC+ neurons
SCG22	SCG2	4.20015	7.52043	332.955	4.7049e-13	4.23895e-11	clusterPOMC+ neurons_vs_others	POMC+ neurons
AGBL41	AGBL4	1.92189	8.24761	192.471	4.87901e-13	4.37362e-11	clusterPOMC+ neurons_vs_others	POMC+ neurons
CELF32	CELF3	1.86758	5.23413	120.823	5.17371e-13	4.59141e-11	clusterPOMC+ neurons_vs_others	POMC+ neurons
APLP1	APLP1	1.76676	5.67336	129.806	5.21849e-13	4.60811e-11	clusterPOMC+ neurons_vs_others	POMC+ neurons
CCDC112	CCDC112	1.02891	6.69551	120.663	5.2696e-13	4.6302e-11	clusterPOMC+ neurons_vs_others	POMC+ neurons
SLC6A172	SLC6A17	3.00981	3.80877	126.867	5.67913e-13	4.96546e-11	clusterPOMC+ neurons_vs_others	POMC+ neurons
QPCT	QPCT	2.50887	3.85043	124.374	5.72418e-13	4.98032e-11	clusterPOMC+ neurons_vs_others	POMC+ neurons
ECEL11	ECEL1	2.26775	5.64315	159.349	6.07985e-13	5.26397e-11	clusterPOMC+ neurons_vs_others	POMC+ neurons
HSP90AB1	HSP90AB1	1.10135	7.79558	119.344	6.1377e-13	5.28826e-11	clusterPOMC+ neurons_vs_others	POMC+ neurons
C12orf45	C12orf45	1.16835	5.7817	118.498	6.77261e-13	5.80711e-11	clusterPOMC+ neurons_vs_others	POMC+ neurons
BAIAP31	BAIAP3	1.30332	5.54163	118.4	6.85093e-13	5.84174e-11	clusterPOMC+ neurons_vs_others	POMC+ neurons
RBP11	RBP1	2.27879	5.18006	137.36	6.87883e-13	5.84174e-11	clusterPOMC+ neurons_vs_others	POMC+ neurons
HTATSF13	HTATSF1	1.2918	6.44948	118.249	6.97274e-13	5.8933e-11	clusterPOMC+ neurons_vs_others	POMC+ neurons
ABLIM2	ABLIM2	1.26275	6.31757	117.948	7.22247e-13	6.07543e-11	clusterPOMC+ neurons_vs_others	POMC+ neurons
AC006387.1	AC006387.1	1.17583	6.83536	116.601	8.46308e-13	7.07507e-11	clusterPOMC+ neurons_vs_others	POMC+ neurons
ATP1B12	ATP1B1	1.11873	6.56599	116.574	8.49056e-13	7.07507e-11	clusterPOMC+ neurons_vs_others	POMC+ neurons
CHAT	CHAT	2.98702	4.46766	164.57	9.36237e-13	7.72896e-11	clusterPOMC+ neurons_vs_others	POMC+ neurons
SCML42	SCML4	2.64795	4.62353	121.782	9.80992e-13	8.02379e-11	clusterPOMC+ neurons_vs_others	POMC+ neurons
YAP11	YAP1	3.31086	6.07311	1070.45	3.16394e-28	2.80784e-24	clusterTanycytes_vs_others	Tanycytes
IL15	IL15	4.35698	4.68058	1002.94	9.75234e-28	5.76981e-24	clusterTanycytes_vs_others	Tanycytes
MRC21	MRC2	3.63379	5.77949	858.619	1.41503e-26	5.46804e-23	clusterTanycytes_vs_others	Tanycytes
VIM1	VIM	2.71651	6.64011	854.383	1.54038e-26	5.46804e-23	clusterTanycytes_vs_others	Tanycytes
CYBRD1	CYBRD1	3.96742	5.0751	736.888	1.9367e-25	4.29681e-22	clusterTanycytes_vs_others	Tanycytes
PRDM161	PRDM16	2.94109	5.47365	712.961	3.39946e-25	6.7041e-22	clusterTanycytes_vs_others	Tanycytes
CCN1	CCN1	4.37446	5.12353	747.487	1.69002e-24	2.49968e-21	clusterTanycytes_vs_others	Tanycytes
MEGF10	MEGF10	3.20684	5.418	644.403	1.89421e-24	2.58618e-21	clusterTanycytes_vs_others	Tanycytes
WDR49	WDR49	3.41929	5.21151	651.89	2.23143e-24	2.82897e-21	clusterTanycytes_vs_others	Tanycytes
ELMO1	ELMO1	2.2943	7.75745	628.273	2.90992e-24	3.44321e-21	clusterTanycytes_vs_others	Tanycytes
ARHGAP42	ARHGAP42	3.10288	5.23214	610.976	4.66604e-24	5.1761e-21	clusterTanycytes_vs_others	Tanycytes
HLX-AS1	HLX-AS1	2.8977	5.31285	605.291	5.46446e-24	5.70522e-21	clusterTanycytes_vs_others	Tanycytes
DAB1	DAB1	2.26979	6.79681	598.143	6.67827e-24	6.58514e-21	clusterTanycytes_vs_others	Tanycytes
DIO2	DIO2	3.58068	4.7217	587.131	9.13765e-24	8.53601e-21	clusterTanycytes_vs_others	Tanycytes
FKBP101	FKBP10	3.09395	5.38626	578.639	1.16812e-23	1.03665e-20	clusterTanycytes_vs_others	Tanycytes
PARD3B1	PARD3B	2.52525	7.82508	643.914	3.58549e-23	2.89268e-20	clusterTanycytes_vs_others	Tanycytes
TNS31	TNS3	2.76841	5.20343	538.417	3.92296e-23	3.02733e-20	clusterTanycytes_vs_others	Tanycytes
HES11	HES1	5.0287	4.48263	595.051	5.27938e-23	3.90432e-20	clusterTanycytes_vs_others	Tanycytes
LIX1	LIX1	3.97491	5.19391	589.595	7.54676e-23	5.35789e-20	clusterTanycytes_vs_others	Tanycytes
LINC018961	LINC01896	3.74534	4.76334	513.902	8.56492e-23	5.84687e-20	clusterTanycytes_vs_others	Tanycytes
NAALADL2	NAALADL2	1.88885	7.75728	503.259	1.21529e-22	7.98897e-20	clusterTanycytes_vs_others	Tanycytes
FBXL71	FBXL7	2.01136	8.3938	491.854	1.78197e-22	1.12958e-19	clusterTanycytes_vs_others	Tanycytes
PRELID21	PRELID2	2.23901	5.85401	467.071	4.21559e-22	2.45608e-19	clusterTanycytes_vs_others	Tanycytes
SMAD32	SMAD3	3.09925	5.44575	525.742	4.28973e-22	2.45608e-19	clusterTanycytes_vs_others	Tanycytes
CAPN6	CAPN6	4.31191	3.75451	457.47	5.95281e-22	3.30176e-19	clusterTanycytes_vs_others	Tanycytes
SFTA31	SFTA3	1.99176	6.80152	455.843	6.31535e-22	3.3967e-19	clusterTanycytes_vs_others	Tanycytes
SLCO1C11	SLCO1C1	3.77392	7.43353	999.129	6.87804e-22	3.59054e-19	clusterTanycytes_vs_others	Tanycytes
ARAP2	ARAP2	2.76029	5.05748	451.097	7.51292e-22	3.73078e-19	clusterTanycytes_vs_others	Tanycytes
SPARC1	SPARC	4.07726	5.29583	586.391	7.56708e-22	3.73078e-19	clusterTanycytes_vs_others	Tanycytes
COL2A11	COL2A1	3.77141	4.69729	449.177	8.06382e-22	3.86824e-19	clusterTanycytes_vs_others	Tanycytes
EDNRB	EDNRB	4.627	4.33317	502.666	1.20016e-21	5.6057e-19	clusterTanycytes_vs_others	Tanycytes
SALL31	SALL3	4.0924	4.05067	433.648	1.44397e-21	6.57156e-19	clusterTanycytes_vs_others	Tanycytes
FGF7	FGF7	2.72064	4.85777	432.969	1.48191e-21	6.57559e-19	clusterTanycytes_vs_others	Tanycytes
KIF231	KIF23	4.32578	4.06592	429.039	1.72295e-21	7.28111e-19	clusterTanycytes_vs_others	Tanycytes
SOX51	SOX5	1.82908	10.2872	425.092	2.00712e-21	8.28475e-19	clusterTanycytes_vs_others	Tanycytes
LINC01994	LINC01994	3.92434	4.05197	420.816	2.37168e-21	9.26821e-19	clusterTanycytes_vs_others	Tanycytes
ANKRD20A1	ANKRD20A1	3.73845	5.09602	531.849	2.40204e-21	9.26821e-19	clusterTanycytes_vs_others	Tanycytes
PTH2R	PTH2R	3.383	4.62397	440.319	2.95136e-21	1.09133e-18	clusterTanycytes_vs_others	Tanycytes
MITF1	MITF	3.89275	4.75238	430.378	3.649e-21	1.32176e-18	clusterTanycytes_vs_others	Tanycytes
LRIG3	LRIG3	3.43961	4.15087	406.593	4.17948e-21	1.48363e-18	clusterTanycytes_vs_others	Tanycytes
SALL2	SALL2	2.88805	4.58195	401.492	5.1441e-21	1.79025e-18	clusterTanycytes_vs_others	Tanycytes
ESCO21	ESCO2	6.02497	3.69021	485.229	8.6223e-21	2.94302e-18	clusterTanycytes_vs_others	Tanycytes
AC079465.1	AC079465.1	2.44032	4.70853	380.663	1.23274e-20	4.12828e-18	clusterTanycytes_vs_others	Tanycytes
PRDM51	PRDM5	2.49674	4.96081	373.224	1.70235e-20	5.49365e-18	clusterTanycytes_vs_others	Tanycytes
GNG5	GNG5	3.4556	4.22301	367.655	2.17611e-20	6.89711e-18	clusterTanycytes_vs_others	Tanycytes
MGST1	MGST1	2.58375	5.13953	372.245	2.3643e-20	7.23515e-18	clusterTanycytes_vs_others	Tanycytes
AC021088.11	AC021088.1	3.01319	4.04662	351.499	4.52465e-20	1.31652e-17	clusterTanycytes_vs_others	Tanycytes
MARC1	MARC1	2.57233	5.71461	436.073	5.28716e-20	1.51358e-17	clusterTanycytes_vs_others	Tanycytes
GMDS-DT1	GMDS-DT	1.40887	6.9238	346.086	5.82222e-20	1.64029e-17	clusterTanycytes_vs_others	Tanycytes
COL22A1	COL22A1	3.00039	4.09818	342.063	7.03827e-20	1.92188e-17	clusterTanycytes_vs_others	Tanycytes
PDE3A	PDE3A	2.43384	10.4119	503.969	7.41142e-20	1.99311e-17	clusterTanycytes_vs_others	Tanycytes
AC002460.2	AC002460.2	4.00132	6.29514	795.863	7.79798e-20	2.06577e-17	clusterTanycytes_vs_others	Tanycytes
COL25A1	COL25A1	2.73471	8.6383	599.776	1.0756e-19	2.79116e-17	clusterTanycytes_vs_others	Tanycytes
AL132857.11	AL132857.1	2.06419	5.30688	332.806	1.09762e-19	2.79116e-17	clusterTanycytes_vs_others	Tanycytes
RAX1	RAX	2.96294	5.83232	436.767	1.1008e-19	2.79116e-17	clusterTanycytes_vs_others	Tanycytes
CA12	CA12	3.39306	3.98754	330.276	1.24175e-19	3.10419e-17	clusterTanycytes_vs_others	Tanycytes
AC104002.3	AC104002.3	1.72419	7.10208	327.787	1.40325e-19	3.41182e-17	clusterTanycytes_vs_others	Tanycytes
GAREM1	GAREM1	1.75526	7.35341	330.832	1.66868e-19	4.00234e-17	clusterTanycytes_vs_others	Tanycytes
ANGPT11	ANGPT1	3.28618	4.14498	323.932	1.69848e-19	4.0195e-17	clusterTanycytes_vs_others	Tanycytes
AC091078.1	AC091078.1	2.3428	6.03889	393.819	1.73395e-19	4.04945e-17	clusterTanycytes_vs_others	Tanycytes
FEZF21	FEZF2	3.81792	3.81716	322.521	1.8224e-19	4.20074e-17	clusterTanycytes_vs_others	Tanycytes
TNFRSF10B1	TNFRSF10B	2.66831	4.58785	320.819	1.9847e-19	4.51622e-17	clusterTanycytes_vs_others	Tanycytes
TEC	TEC	3.17595	4.26071	325.449	2.02231e-19	4.54355e-17	clusterTanycytes_vs_others	Tanycytes
FAM111A	FAM111A	4.57268	3.60518	347.475	2.48272e-19	5.50822e-17	clusterTanycytes_vs_others	Tanycytes
FANCB1	FANCB	3.88595	3.51583	315.699	2.57174e-19	5.5385e-17	clusterTanycytes_vs_others	Tanycytes
RASGEF1B	RASGEF1B	1.80195	9.50715	329.411	2.59627e-19	5.5385e-17	clusterTanycytes_vs_others	Tanycytes
TYMS1	TYMS	3.1913	3.53308	315.227	2.63438e-19	5.5385e-17	clusterTanycytes_vs_others	Tanycytes
MMRN11	MMRN1	3.78861	3.9337	315.094	2.65239e-19	5.5385e-17	clusterTanycytes_vs_others	Tanycytes
AC139720.1	AC139720.1	3.12494	6.72464	650.356	2.9515e-19	6.09141e-17	clusterTanycytes_vs_others	Tanycytes
LINC01833	LINC01833	2.04921	5.65807	309.914	3.46229e-19	6.98321e-17	clusterTanycytes_vs_others	Tanycytes
ANP32E1	ANP32E	3.02632	4.33766	308.03	3.81849e-19	7.57108e-17	clusterTanycytes_vs_others	Tanycytes
CENPM1	CENPM	3.40695	3.92344	307.927	3.83908e-19	7.57108e-17	clusterTanycytes_vs_others	Tanycytes
PARP141	PARP14	2.51716	4.48534	300.863	5.56979e-19	1.08635e-16	clusterTanycytes_vs_others	Tanycytes
PDLIM3	PDLIM3	3.05728	4.22356	300.467	5.68868e-19	1.09748e-16	clusterTanycytes_vs_others	Tanycytes
ARHGAP11B1	ARHGAP11B	3.98982	4.87276	450.391	5.92422e-19	1.13064e-16	clusterTanycytes_vs_others	Tanycytes
REST1	REST	2.76248	5.40453	378.326	8.05556e-19	1.48936e-16	clusterTanycytes_vs_others	Tanycytes
ELMO1-AS1	ELMO1-AS1	2.92734	5.24428	382.296	8.86038e-19	1.62127e-16	clusterTanycytes_vs_others	Tanycytes
AC021055.1	AC021055.1	4.31974	3.73907	319.557	8.9836e-19	1.62704e-16	clusterTanycytes_vs_others	Tanycytes
FBLN5	FBLN5	3.66744	3.22988	291.001	9.4896e-19	1.70132e-16	clusterTanycytes_vs_others	Tanycytes
PON2	PON2	1.3863	6.92184	290.177	9.9292e-19	1.76233e-16	clusterTanycytes_vs_others	Tanycytes
ZFP36L11	ZFP36L1	4.6074	3.85111	351.086	1.02265e-18	1.79714e-16	clusterTanycytes_vs_others	Tanycytes
CCND11	CCND1	3.40647	4.1876	316.235	1.05403e-18	1.79733e-16	clusterTanycytes_vs_others	Tanycytes
SLC6A162	SLC6A16	2.23675	5.05583	288.934	1.06326e-18	1.79733e-16	clusterTanycytes_vs_others	Tanycytes
MAP3K201	MAP3K20	2.05542	5.09488	288.934	1.06327e-18	1.79733e-16	clusterTanycytes_vs_others	Tanycytes
PLPP31	PLPP3	2.18013	4.59299	288.382	1.09621e-18	1.83553e-16	clusterTanycytes_vs_others	Tanycytes
UACA1	UACA	3.24102	4.30807	288.134	1.11133e-18	1.84345e-16	clusterTanycytes_vs_others	Tanycytes
AC073626.1	AC073626.1	4.05646	3.48686	313.691	1.19243e-18	1.95967e-16	clusterTanycytes_vs_others	Tanycytes
SIX3	SIX3	1.59571	6.53917	286.209	1.23666e-18	2.01371e-16	clusterTanycytes_vs_others	Tanycytes
TRIM5	TRIM5	2.23292	4.17137	280.109	1.74232e-18	2.76112e-16	clusterTanycytes_vs_others	Tanycytes
AF117829.11	AF117829.1	1.59567	6.9042	277.005	2.07974e-18	3.26667e-16	clusterTanycytes_vs_others	Tanycytes
CELSR1	CELSR1	1.89153	5.00135	276.744	2.11103e-18	3.28673e-16	clusterTanycytes_vs_others	Tanycytes
SULF11	SULF1	2.7687	5.89875	421.89	2.31425e-18	3.51073e-16	clusterTanycytes_vs_others	Tanycytes
MEP1B	MEP1B	2.25058	4.64101	275.046	2.3277e-18	3.51073e-16	clusterTanycytes_vs_others	Tanycytes
CD99	CD99	2.79657	5.01123	328.087	2.55929e-18	3.7854e-16	clusterTanycytes_vs_others	Tanycytes
LINC01995	LINC01995	4.9885	3.17755	328.751	2.66054e-18	3.88876e-16	clusterTanycytes_vs_others	Tanycytes
ZNF536	ZNF536	1.874	7.23309	322.624	2.67299e-18	3.88876e-16	clusterTanycytes_vs_others	Tanycytes
HMGA2	HMGA2	3.26046	7.07254	633.446	2.72861e-18	3.93741e-16	clusterTanycytes_vs_others	Tanycytes
SERPINI2	SERPINI2	3.44758	3.38118	271.874	2.79751e-18	4.00427e-16	clusterTanycytes_vs_others	Tanycytes
TLL11	TLL1	2.89385	4.43089	270.688	2.99801e-18	4.25693e-16	clusterTanycytes_vs_others	Tanycytes
AL022068.1	AL022068.1	1.47393	7.66449	269.624	3.19095e-18	4.49493e-16	clusterTanycytes_vs_others	Tanycytes
TTYH1	TTYH1	1.81687	4.80259	268.285	3.4524e-18	4.82181e-16	clusterTanycytes_vs_others	Tanycytes
AP000962.1	AP000962.1	2.42162	4.12216	268.163	3.47733e-18	4.82181e-16	clusterTanycytes_vs_others	Tanycytes
ITGB5	ITGB5	3.14851	4.48114	306.354	3.67716e-18	5.03006e-16	clusterTanycytes_vs_others	Tanycytes
PDGFRB	PDGFRB	4.16485	3.43056	291.276	3.68419e-18	5.03006e-16	clusterTanycytes_vs_others	Tanycytes
AC123768.3	AC123768.3	2.27041	5.07196	282.531	3.80904e-18	5.16082e-16	clusterTanycytes_vs_others	Tanycytes
GABRG3-AS1	GABRG3-AS1	1.70417	9.97857	280.507	3.89085e-18	5.23172e-16	clusterTanycytes_vs_others	Tanycytes
NOTCH11	NOTCH1	3.13352	4.05291	266.078	3.93408e-18	5.25008e-16	clusterTanycytes_vs_others	Tanycytes
CFAP54	CFAP54	1.7811	5.46752	265.84	3.99017e-18	5.28519e-16	clusterTanycytes_vs_others	Tanycytes
FOXO1	FOXO1	2.00441	5.62905	280.471	4.49938e-18	5.91552e-16	clusterTanycytes_vs_others	Tanycytes
VIPR2	VIPR2	3.54823	3.34472	263.106	4.69782e-18	6.11013e-16	clusterTanycytes_vs_others	Tanycytes
GRIK4	GRIK4	1.69511	6.79154	274.72	4.84121e-18	6.22656e-16	clusterTanycytes_vs_others	Tanycytes
WWOX1	WWOX	1.52889	8.23441	261.323	5.22978e-18	6.63025e-16	clusterTanycytes_vs_others	Tanycytes
TMTC21	TMTC2	1.61822	8.4097	269.033	5.34479e-18	6.728e-16	clusterTanycytes_vs_others	Tanycytes
DOCK11	DOCK1	2.10353	6.31253	331.978	5.43971e-18	6.7517e-16	clusterTanycytes_vs_others	Tanycytes
AC069277.1	AC069277.1	1.50622	8.24487	259.656	5.78493e-18	7.13033e-16	clusterTanycytes_vs_others	Tanycytes
HS3ST41	HS3ST4	2.0907	6.4362	309.54	6.90813e-18	8.28462e-16	clusterTanycytes_vs_others	Tanycytes
SPART1	SPART	1.8925	5.46334	256.617	6.96305e-18	8.29444e-16	clusterTanycytes_vs_others	Tanycytes
IGFBP31	IGFBP3	4.04537	4.05752	280.296	7.3559e-18	8.704e-16	clusterTanycytes_vs_others	Tanycytes
PRDX61	PRDX6	2.41632	4.41704	254.955	7.71224e-18	9.0652e-16	clusterTanycytes_vs_others	Tanycytes
SOX9-AS1	SOX9-AS1	2.61861	4.1563	254.022	8.17005e-18	9.54014e-16	clusterTanycytes_vs_others	Tanycytes
DOK5	DOK5	2.40861	6.9569	426.156	1.20723e-17	1.37353e-15	clusterTanycytes_vs_others	Tanycytes
CDK11	CDK1	5.20071	3.34278	295.395	1.2469e-17	1.40083e-15	clusterTanycytes_vs_others	Tanycytes
QKI	QKI	1.57599	8.73435	251.436	1.54788e-17	1.71708e-15	clusterTanycytes_vs_others	Tanycytes
KNL11	KNL1	4.34517	4.30435	351.268	1.57874e-17	1.7297e-15	clusterTanycytes_vs_others	Tanycytes
SLC25A211	SLC25A21	2.37254	6.14649	357.326	1.71962e-17	1.86107e-15	clusterTanycytes_vs_others	Tanycytes
MCM10	MCM10	4.46226	3.16257	242.042	1.74188e-17	1.87374e-15	clusterTanycytes_vs_others	Tanycytes
NEMP11	NEMP1	2.64417	4.11475	241.818	1.76719e-17	1.88951e-15	clusterTanycytes_vs_others	Tanycytes
BDH2	BDH2	2.47395	4.76307	247.644	1.78823e-17	1.90056e-15	clusterTanycytes_vs_others	Tanycytes
SMAD61	SMAD6	3.38824	4.07127	240.886	1.87712e-17	1.98316e-15	clusterTanycytes_vs_others	Tanycytes
AC078955.11	AC078955.1	3.95209	3.33513	261.041	1.92229e-17	2.01886e-15	clusterTanycytes_vs_others	Tanycytes
LINC01579	LINC01579	2.58198	5.13494	304.43	1.955e-17	2.04114e-15	clusterTanycytes_vs_others	Tanycytes
NEIL31	NEIL3	5.84515	3.29131	299.18	1.98709e-17	2.06251e-15	clusterTanycytes_vs_others	Tanycytes
TXK	TXK	3.33452	3.95664	259.465	2.16789e-17	2.19873e-15	clusterTanycytes_vs_others	Tanycytes
SFRP1	SFRP1	2.26874	4.83212	236.992	2.42051e-17	2.42722e-15	clusterTanycytes_vs_others	Tanycytes
TMEM47	TMEM47	1.95523	4.60403	236.639	2.47732e-17	2.47022e-15	clusterTanycytes_vs_others	Tanycytes
PLCH1-AS1	PLCH1-AS1	2.86206	4.66697	272.905	2.51068e-17	2.4895e-15	clusterTanycytes_vs_others	Tanycytes
FSTL1	FSTL1	2.19058	5.05371	244.337	2.53102e-17	2.49573e-15	clusterTanycytes_vs_others	Tanycytes
CBWD5	CBWD5	1.43027	6.40094	235.476	2.67485e-17	2.62298e-15	clusterTanycytes_vs_others	Tanycytes
GABRG3	GABRG3	1.71393	9.51172	268.134	2.83921e-17	2.76886e-15	clusterTanycytes_vs_others	Tanycytes
C1orf541	C1orf54	2.66028	4.73394	250.509	2.86214e-17	2.77596e-15	clusterTanycytes_vs_others	Tanycytes
PTCH1	PTCH1	1.91663	6.43551	287.425	2.93354e-17	2.8294e-15	clusterTanycytes_vs_others	Tanycytes
AL139393.1	AL139393.1	3.21364	3.46398	234.004	2.94912e-17	2.8294e-15	clusterTanycytes_vs_others	Tanycytes
KIF111	KIF11	4.17314	4.47276	361.039	2.97866e-17	2.84238e-15	clusterTanycytes_vs_others	Tanycytes
STK17B	STK17B	3.44557	3.44953	230.231	3.79669e-17	3.6036e-15	clusterTanycytes_vs_others	Tanycytes
GTSE11	GTSE1	5.40035	4.23334	374.044	4.15005e-17	3.91804e-15	clusterTanycytes_vs_others	Tanycytes
GRM7-AS3	GRM7-AS3	1.46938	7.69602	228.512	4.26493e-17	3.98621e-15	clusterTanycytes_vs_others	Tanycytes
IGSF11	IGSF11	1.64945	5.86951	228.505	4.26717e-17	3.98621e-15	clusterTanycytes_vs_others	Tanycytes
TEAD22	TEAD2	2.94993	3.96486	247.072	4.37166e-17	4.06244e-15	clusterTanycytes_vs_others	Tanycytes
ID4	ID4	1.26286	7.15714	227.958	4.42856e-17	4.09388e-15	clusterTanycytes_vs_others	Tanycytes
ADAMTS171	ADAMTS17	3.35772	5.19308	387.344	4.47566e-17	4.11598e-15	clusterTanycytes_vs_others	Tanycytes
CHML	CHML	2.23262	4.37151	227.094	4.69703e-17	4.2973e-15	clusterTanycytes_vs_others	Tanycytes
CHST3	CHST3	2.25118	4.1323	223.491	6.01678e-17	5.33959e-15	clusterTanycytes_vs_others	Tanycytes
KC877982.1	KC877982.1	2.86522	3.89029	220.917	7.19618e-17	6.23049e-15	clusterTanycytes_vs_others	Tanycytes
SLC16A4	SLC16A4	1.455	6.01992	220.709	7.30161e-17	6.26069e-15	clusterTanycytes_vs_others	Tanycytes
MDFIC1	MDFIC	2.81237	4.6962	245.793	7.62179e-17	6.5038e-15	clusterTanycytes_vs_others	Tanycytes
AC026150.1	AC026150.1	3.30162	2.94902	218.005	8.83066e-17	7.42822e-15	clusterTanycytes_vs_others	Tanycytes
ANKRD20A3	ANKRD20A3	3.38033	3.70039	233.467	9.03419e-17	7.52807e-15	clusterTanycytes_vs_others	Tanycytes
FZD8	FZD8	3.26643	3.4453	217.245	9.31891e-17	7.72903e-15	clusterTanycytes_vs_others	Tanycytes
LINC02256	LINC02256	2.33843	4.49797	223.742	9.80602e-17	8.09521e-15	clusterTanycytes_vs_others	Tanycytes
OPN31	OPN3	3.16689	3.45317	215.435	1.06e-16	8.59087e-15	clusterTanycytes_vs_others	Tanycytes
MGME1	MGME1	3.11772	4.18366	251.278	1.08455e-16	8.72315e-15	clusterTanycytes_vs_others	Tanycytes
TRIM56	TRIM56	2.0965	4.37978	214.443	1.13797e-16	9.09813e-15	clusterTanycytes_vs_others	Tanycytes
ADGRV1	ADGRV1	1.3508	7.66887	213.96	1.17816e-16	9.37718e-15	clusterTanycytes_vs_others	Tanycytes
IQGAP3	IQGAP3	3.74589	2.87044	213.27	1.23807e-16	9.81002e-15	clusterTanycytes_vs_others	Tanycytes
SHB1	SHB	1.67189	5.6551	211.853	1.37155e-16	1.07715e-14	clusterTanycytes_vs_others	Tanycytes
PTPRB1	PTPRB	2.16327	4.66864	211.671	1.3898e-16	1.08668e-14	clusterTanycytes_vs_others	Tanycytes
FOLH1	FOLH1	4.27733	4.19687	307.875	1.47189e-16	1.13585e-14	clusterTanycytes_vs_others	Tanycytes
PARP4	PARP4	2.08996	4.65685	209.413	1.63827e-16	1.24797e-14	clusterTanycytes_vs_others	Tanycytes
WNT5A	WNT5A	4.41673	3.28164	246.055	1.68272e-16	1.27635e-14	clusterTanycytes_vs_others	Tanycytes
BCKDHB1	BCKDHB	1.30862	8.18481	208.183	1.79311e-16	1.34287e-14	clusterTanycytes_vs_others	Tanycytes
FAM111B	FAM111B	3.763	3.1443	206.911	1.9694e-16	1.46255e-14	clusterTanycytes_vs_others	Tanycytes
NDC801	NDC80	3.66495	3.95964	254.031	2.11031e-16	1.56066e-14	clusterTanycytes_vs_others	Tanycytes
HIF3A	HIF3A	2.13954	5.02522	230.804	2.19678e-16	1.61787e-14	clusterTanycytes_vs_others	Tanycytes
DZANK1	DZANK1	1.49195	6.14701	204.417	2.37051e-16	1.73145e-14	clusterTanycytes_vs_others	Tanycytes
AC019127.11	AC019127.1	2.72295	4.77164	257.521	2.42043e-16	1.76066e-14	clusterTanycytes_vs_others	Tanycytes
ZFP36L21	ZFP36L2	3.92444	3.41315	219.639	2.49181e-16	1.80519e-14	clusterTanycytes_vs_others	Tanycytes
DAAM2	DAAM2	3.29579	3.40096	203.521	2.53496e-16	1.82898e-14	clusterTanycytes_vs_others	Tanycytes
NEDD9	NEDD9	1.27935	6.17722	202.525	2.73209e-16	1.95532e-14	clusterTanycytes_vs_others	Tanycytes
AC091906.11	AC091906.1	2.86115	4.88128	277.898	2.74926e-16	1.9597e-14	clusterTanycytes_vs_others	Tanycytes
PBK1	PBK	4.82284	3.3741	248.398	2.8224e-16	2.00379e-14	clusterTanycytes_vs_others	Tanycytes
SEMA5A1	SEMA5A	3.06666	6.90838	476.048	3.02608e-16	2.13134e-14	clusterTanycytes_vs_others	Tanycytes
RREB11	RREB1	3.11917	3.94633	200.969	3.07297e-16	2.15582e-14	clusterTanycytes_vs_others	Tanycytes
LINC015151	LINC01515	2.52391	6.39714	357.436	3.26217e-16	2.26173e-14	clusterTanycytes_vs_others	Tanycytes
PDGFRL	PDGFRL	3.04965	3.24452	199.424	3.4561e-16	2.37761e-14	clusterTanycytes_vs_others	Tanycytes
SIX3-AS1	SIX3-AS1	2.56985	4.00291	199.341	3.47801e-16	2.38344e-14	clusterTanycytes_vs_others	Tanycytes
SDK1	SDK1	1.49505	9.67681	210.788	3.68863e-16	2.51806e-14	clusterTanycytes_vs_others	Tanycytes
TRIM59	TRIM59	2.37029	4.47902	202.884	3.89402e-16	2.63389e-14	clusterTanycytes_vs_others	Tanycytes
TMEM63A	TMEM63A	2.77621	3.44298	197.559	3.98704e-16	2.68053e-14	clusterTanycytes_vs_others	Tanycytes
ACSF2	ACSF2	3.12126	3.2091	196.796	4.2284e-16	2.83207e-14	clusterTanycytes_vs_others	Tanycytes
DSN1	DSN1	3.38051	3.301	196.713	4.25555e-16	2.83954e-14	clusterTanycytes_vs_others	Tanycytes
NOD1	NOD1	2.15226	3.86673	195.814	4.56221e-16	3.01021e-14	clusterTanycytes_vs_others	Tanycytes
ERBIN	ERBIN	1.12321	7.67802	195.218	4.77823e-16	3.14107e-14	clusterTanycytes_vs_others	Tanycytes
COL9A3	COL9A3	3.02895	4.03456	204.095	4.89269e-16	3.19266e-14	clusterTanycytes_vs_others	Tanycytes
KIF2C	KIF2C	3.57365	3.93648	235.903	5.39943e-16	3.48213e-14	clusterTanycytes_vs_others	Tanycytes
PLAG11	PLAG1	1.93275	4.99439	193.636	5.40573e-16	3.48213e-14	clusterTanycytes_vs_others	Tanycytes
NCAPH	NCAPH	5.08225	2.86435	226.398	5.41478e-16	3.48213e-14	clusterTanycytes_vs_others	Tanycytes
RRBP1	RRBP1	1.79455	4.94861	193.527	5.45177e-16	3.49326e-14	clusterTanycytes_vs_others	Tanycytes
MCUB1	MCUB	1.79988	5.20134	193.195	5.59549e-16	3.55966e-14	clusterTanycytes_vs_others	Tanycytes
MNS11	MNS1	1.18784	6.76924	192.999	5.68238e-16	3.60202e-14	clusterTanycytes_vs_others	Tanycytes
ITGB5-AS1	ITGB5-AS1	4.1638	3.0281	225.423	5.75108e-16	3.63259e-14	clusterTanycytes_vs_others	Tanycytes
GRIA25	GRIA2	2.34431	8.49309	543.046	3.39797e-23	6.03105e-19	clusterTelencephalic neurons_vs_others	Telencephalic neurons
FOXG1	FOXG1	5.85574	1.66823	279.731	1.78011e-18	1.17763e-14	clusterTelencephalic neurons_vs_others	Telencephalic neurons
MYT1L4	MYT1L	2.80164	7.72063	276.804	2.10382e-18	1.17763e-14	clusterTelencephalic neurons_vs_others	Telencephalic neurons
FOXG1-AS1	FOXG1-AS1	7.0246	1.46652	297.639	2.65397e-18	1.17763e-14	clusterTelencephalic neurons_vs_others	Telencephalic neurons
LINC02281	LINC02281	7.30514	2.56651	412.139	2.14825e-17	6.43517e-14	clusterTelencephalic neurons_vs_others	Telencephalic neurons
LHX8	LHX8	8.07282	1.68043	288.107	2.17539e-17	6.43517e-14	clusterTelencephalic neurons_vs_others	Telencephalic neurons
LRRC71	LRRC7	2.34846	7.68924	320.25	4.43295e-17	1.12401e-13	clusterTelencephalic neurons_vs_others	Telencephalic neurons
HECW14	HECW1	2.45711	6.42561	218.495	8.53033e-17	1.89256e-13	clusterTelencephalic neurons_vs_others	Telencephalic neurons
LINC01551	LINC01551	6.33693	3.72759	474.778	1.05838e-16	2.08724e-13	clusterTelencephalic neurons_vs_others	Telencephalic neurons
GPC61	GPC6	1.57464	9.99917	216.87	1.26063e-16	2.23749e-13	clusterTelencephalic neurons_vs_others	Telencephalic neurons
AL158840.11	AL158840.1	4.36577	2.88461	183.781	1.18905e-15	1.91858e-12	clusterTelencephalic neurons_vs_others	Telencephalic neurons
TSPAN74	TSPAN7	2.41142	6.56987	174.149	2.66141e-15	3.83452e-12	clusterTelencephalic neurons_vs_others	Telencephalic neurons
AP001825.1	AP001825.1	2.83233	7.29497	344.384	2.80854e-15	3.83452e-12	clusterTelencephalic neurons_vs_others	Telencephalic neurons
STXBP5-AS14	STXBP5-AS1	1.92196	7.3449	169.803	9.28644e-15	1.17732e-11	clusterTelencephalic neurons_vs_others	Telencephalic neurons
STMN44	STMN4	3.40722	5.73193	168.32	1.15345e-14	1.27991e-11	clusterTelencephalic neurons_vs_others	Telencephalic neurons
P2RY12	P2RY12	2.22247	4.86222	157.692	1.15378e-14	1.27991e-11	clusterTelencephalic neurons_vs_others	Telencephalic neurons
AC011586.1	AC011586.1	5.67327	1.92167	157.913	2.15817e-14	2.25326e-11	clusterTelencephalic neurons_vs_others	Telencephalic neurons
MIR7-3HG4	MIR7-3HG	2.20937	6.62749	137.826	8.09453e-14	7.98166e-11	clusterTelencephalic neurons_vs_others	Telencephalic neurons
ARPP211	ARPP21	3.36087	3.87895	137.54	1.01683e-13	8.81728e-11	clusterTelencephalic neurons_vs_others	Telencephalic neurons
MSR1	MSR1	4.82779	3.16621	198.635	1.04412e-13	8.81728e-11	clusterTelencephalic neurons_vs_others	Telencephalic neurons
XKR44	XKR4	1.57198	8.71266	145.472	1.04578e-13	8.81728e-11	clusterTelencephalic neurons_vs_others	Telencephalic neurons
NSG22	NSG2	3.87327	4.42047	143.236	1.09291e-13	8.81728e-11	clusterTelencephalic neurons_vs_others	Telencephalic neurons
CDH9	CDH9	4.54264	2.1094	133.148	1.60558e-13	1.23902e-10	clusterTelencephalic neurons_vs_others	Telencephalic neurons
PTPRN5	PTPRN	3.18816	6.49945	138.723	1.69436e-13	1.25305e-10	clusterTelencephalic neurons_vs_others	Telencephalic neurons
SOX2-OT2	SOX2-OT	1.38422	10.721	142.3	1.82001e-13	1.29214e-10	clusterTelencephalic neurons_vs_others	Telencephalic neurons
MED12L	MED12L	1.73799	5.83556	128.074	2.29058e-13	1.56367e-10	clusterTelencephalic neurons_vs_others	Telencephalic neurons
IGSF10	IGSF10	2.17547	4.72125	126.99	2.5813e-13	1.69687e-10	clusterTelencephalic neurons_vs_others	Telencephalic neurons
ANK33	ANK3	1.87075	9.70511	185.693	4.0469e-13	2.5653e-10	clusterTelencephalic neurons_vs_others	Telencephalic neurons
RUNX1T1	RUNX1T1	3.03251	5.95307	230.073	5.28835e-13	3.21446e-10	clusterTelencephalic neurons_vs_others	Telencephalic neurons
TUBB2B4	TUBB2B	1.40903	7.10074	120.12	5.61041e-13	3.21446e-10	clusterTelencephalic neurons_vs_others	Telencephalic neurons
ARX	ARX	4.42865	2.15999	120.114	5.61431e-13	3.21446e-10	clusterTelencephalic neurons_vs_others	Telencephalic neurons
AL133166.1	AL133166.1	5.10179	1.07514	117.304	7.79012e-13	4.32084e-10	clusterTelencephalic neurons_vs_others	Telencephalic neurons
PTPRO4	PTPRO	1.24343	7.90482	115.956	9.13542e-13	4.91347e-10	clusterTelencephalic neurons_vs_others	Telencephalic neurons
DGKB	DGKB	3.04076	8.22917	254.115	9.81546e-13	5.12396e-10	clusterTelencephalic neurons_vs_others	Telencephalic neurons
AC091938.1	AC091938.1	3.92666	2.3737	114.773	1.05187e-12	5.13808e-10	clusterTelencephalic neurons_vs_others	Telencephalic neurons
AC068308.12	AC068308.1	1.35856	9.09627	121.826	1.05516e-12	5.13808e-10	clusterTelencephalic neurons_vs_others	Telencephalic neurons
TFPI2	TFPI2	5.63733	2.86887	165.462	1.07706e-12	5.13808e-10	clusterTelencephalic neurons_vs_others	Telencephalic neurons
DLG2	DLG2	2.00715	10.2042	204.802	1.10005e-12	5.13808e-10	clusterTelencephalic neurons_vs_others	Telencephalic neurons
CACNA1E4	CACNA1E	2.11016	6.68285	114.821	1.30273e-12	5.92877e-10	clusterTelencephalic neurons_vs_others	Telencephalic neurons
AP003025.21	AP003025.2	5.08293	2.75814	126.01	1.39701e-12	6.19888e-10	clusterTelencephalic neurons_vs_others	Telencephalic neurons
SCG34	SCG3	2.17242	6.54989	109.587	1.97804e-12	8.56299e-10	clusterTelencephalic neurons_vs_others	Telencephalic neurons
KCNMA14	KCNMA1	2.03641	7.26517	139.658	2.10377e-12	8.89043e-10	clusterTelencephalic neurons_vs_others	Telencephalic neurons
SCN2A4	SCN2A	1.73925	6.98268	106.024	3.09351e-12	1.2769e-09	clusterTelencephalic neurons_vs_others	Telencephalic neurons
DSCAM4	DSCAM	1.89314	8.90315	133.379	3.59826e-12	1.45149e-09	clusterTelencephalic neurons_vs_others	Telencephalic neurons
AC011586.2	AC011586.2	4.21746	3.59764	163.842	4.99185e-12	1.9689e-09	clusterTelencephalic neurons_vs_others	Telencephalic neurons
SLC1A2	SLC1A2	3.04597	5.15508	136.524	5.13932e-12	1.98299e-09	clusterTelencephalic neurons_vs_others	Telencephalic neurons
FSTL51	FSTL5	2.89743	4.52102	120.17	6.97338e-12	2.63342e-09	clusterTelencephalic neurons_vs_others	Telencephalic neurons
GPC6-AS1	GPC6-AS1	1.80796	4.93501	98.4998	8.26838e-12	3.05741e-09	clusterTelencephalic neurons_vs_others	Telencephalic neurons
TUSC71	TUSC7	4.05525	3.49034	105.745	8.78079e-12	3.18062e-09	clusterTelencephalic neurons_vs_others	Telencephalic neurons
L1CAM5	L1CAM	2.33205	5.76138	97.4801	9.48719e-12	3.36776e-09	clusterTelencephalic neurons_vs_others	Telencephalic neurons
ISLR21	ISLR2	2.91293	3.85457	91.539	2.16049e-11	7.4824e-09	clusterTelencephalic neurons_vs_others	Telencephalic neurons
SRRM45	SRRM4	1.49448	7.86782	98.0711	2.22028e-11	7.4824e-09	clusterTelencephalic neurons_vs_others	Telencephalic neurons
PHYHIPL1	PHYHIPL	1.02337	7.46143	91.3023	2.23431e-11	7.4824e-09	clusterTelencephalic neurons_vs_others	Telencephalic neurons
AC125613.12	AC125613.1	1.0646	10.0238	90.7881	2.40397e-11	7.90149e-09	clusterTelencephalic neurons_vs_others	Telencephalic neurons
DPYD	DPYD	1.50196	8.62642	118.021	3.68099e-11	1.18789e-08	clusterTelencephalic neurons_vs_others	Telencephalic neurons
PRR16	PRR16	2.91171	4.78353	112.733	3.86078e-11	1.22366e-08	clusterTelencephalic neurons_vs_others	Telencephalic neurons
NBEA1	NBEA	0.864896	9.5096	86.3623	4.57146e-11	1.4093e-08	clusterTelencephalic neurons_vs_others	Telencephalic neurons
FEZF1-AS1	FEZF1-AS1	2.92078	4.19531	89.3936	4.6053e-11	1.4093e-08	clusterTelencephalic neurons_vs_others	Telencephalic neurons
FGF131	FGF13	1.08787	8.2559	85.9198	4.8812e-11	1.46842e-08	clusterTelencephalic neurons_vs_others	Telencephalic neurons
KCND31	KCND3	2.64532	4.32274	86.4085	5.89643e-11	1.74426e-08	clusterTelencephalic neurons_vs_others	Telencephalic neurons
TMEM59L4	TMEM59L	1.83301	6.69364	83.207	7.33492e-11	2.13422e-08	clusterTelencephalic neurons_vs_others	Telencephalic neurons
MAPT4	MAPT	1.42196	7.40635	82.731	7.88597e-11	2.25755e-08	clusterTelencephalic neurons_vs_others	Telencephalic neurons
CADM2	CADM2	1.14437	10.1354	90.0429	9.84384e-11	2.77331e-08	clusterTelencephalic neurons_vs_others	Telencephalic neurons
AP000857.2	AP000857.2	2.1379	4.63734	80.714	1.20428e-10	3.33982e-08	clusterTelencephalic neurons_vs_others	Telencephalic neurons
SLC35F1	SLC35F1	1.57309	7.79487	109.375	1.41328e-10	3.85912e-08	clusterTelencephalic neurons_vs_others	Telencephalic neurons
FGF143	FGF14	1.55291	8.64422	103.897	1.55616e-10	4.15787e-08	clusterTelencephalic neurons_vs_others	Telencephalic neurons
SVOP5	SVOP	2.33027	6.03295	81.6841	1.56954e-10	4.15787e-08	clusterTelencephalic neurons_vs_others	Telencephalic neurons
ANKS1B	ANKS1B	0.924763	8.64057	77.3481	1.82727e-10	4.76945e-08	clusterTelencephalic neurons_vs_others	Telencephalic neurons
GAP432	GAP43	2.49548	7.88506	125.891	2.30269e-10	5.92325e-08	clusterTelencephalic neurons_vs_others	Telencephalic neurons
SYP4	SYP	1.50407	6.51079	75.1146	2.62086e-10	6.64538e-08	clusterTelencephalic neurons_vs_others	Telencephalic neurons
SYN31	SYN3	1.3051	6.90534	74.7529	2.967e-10	7.41708e-08	clusterTelencephalic neurons_vs_others	Telencephalic neurons
TUBB2A4	TUBB2A	1.97825	6.56411	72.3929	4.10886e-10	9.99015e-08	clusterTelencephalic neurons_vs_others	Telencephalic neurons
MEF2C	MEF2C	1.52278	5.78955	71.2833	4.95197e-10	1.18774e-07	clusterTelencephalic neurons_vs_others	Telencephalic neurons
CACNA1C1	CACNA1C	1.0268	7.94916	71.0873	5.11894e-10	1.21141e-07	clusterTelencephalic neurons_vs_others	Telencephalic neurons
POU6F21	POU6F2	1.69769	6.87729	88.1622	7.71529e-10	1.80182e-07	clusterTelencephalic neurons_vs_others	Telencephalic neurons
UBE3A4	UBE3A	0.769437	9.86769	68.2918	8.27251e-10	1.90687e-07	clusterTelencephalic neurons_vs_others	Telencephalic neurons
RALYL	RALYL	1.66274	8.49567	108.312	8.60317e-10	1.95766e-07	clusterTelencephalic neurons_vs_others	Telencephalic neurons
CHGB4	CHGB	2.69242	6.36674	68.7364	1.19651e-09	2.68821e-07	clusterTelencephalic neurons_vs_others	Telencephalic neurons
SCN9A3	SCN9A	1.11109	7.92099	65.8037	1.28244e-09	2.84525e-07	clusterTelencephalic neurons_vs_others	Telencephalic neurons
AC069228.14	AC069228.1	1.05621	8.45053	65.8881	1.33716e-09	2.93003e-07	clusterTelencephalic neurons_vs_others	Telencephalic neurons
LINC009031	LINC00903	3.01855	3.84282	73.3526	1.39708e-09	3.02399e-07	clusterTelencephalic neurons_vs_others	Telencephalic neurons
POU2F21	POU2F2	1.77315	6.21012	71.2973	1.79834e-09	3.84563e-07	clusterTelencephalic neurons_vs_others	Telencephalic neurons
MLLT114	MLLT11	1.72889	5.5291	62.8607	2.18518e-09	4.61723e-07	clusterTelencephalic neurons_vs_others	Telencephalic neurons
CELF44	CELF4	0.989203	7.99406	62.3978	2.37977e-09	4.96924e-07	clusterTelencephalic neurons_vs_others	Telencephalic neurons
SLC44A5	SLC44A5	1.0963	8.49293	69.1838	2.59953e-09	5.36501e-07	clusterTelencephalic neurons_vs_others	Telencephalic neurons
KIF5C4	KIF5C	0.890988	8.35377	60.611	3.32072e-09	6.69766e-07	clusterTelencephalic neurons_vs_others	Telencephalic neurons
LSAMP	LSAMP	1.78491	10.2172	105.454	4.21875e-09	8.41333e-07	clusterTelencephalic neurons_vs_others	Telencephalic neurons
GRIA11	GRIA1	1.33665	7.74013	72.3234	4.32255e-09	8.52455e-07	clusterTelencephalic neurons_vs_others	Telencephalic neurons
PTPRN24	PTPRN2	0.749972	9.20381	59.0323	4.48111e-09	8.74013e-07	clusterTelencephalic neurons_vs_others	Telencephalic neurons
HTR2C	HTR2C	4.09862	9.02482	123.552	4.94426e-09	9.53867e-07	clusterTelencephalic neurons_vs_others	Telencephalic neurons
LPGAT1	LPGAT1	0.859236	7.08656	58.0272	5.43759e-09	1.03776e-06	clusterTelencephalic neurons_vs_others	Telencephalic neurons
STMN24	STMN2	1.54221	8.91605	79.7127	5.9887e-09	1.13078e-06	clusterTelencephalic neurons_vs_others	Telencephalic neurons
SDC2	SDC2	2.7694	6.47271	100.791	9.02003e-09	1.68523e-06	clusterTelencephalic neurons_vs_others	Telencephalic neurons
AC096576.31	AC096576.3	2.84578	3.29457	55.1197	9.63302e-09	1.77176e-06	clusterTelencephalic neurons_vs_others	Telencephalic neurons
RUNDC3B4	RUNDC3B	1.29587	7.1204	57.6697	9.68285e-09	1.77176e-06	clusterTelencephalic neurons_vs_others	Telencephalic neurons
TXNIP	TXNIP	1.14859	6.39982	54.5057	1.08954e-08	1.9733e-06	clusterTelencephalic neurons_vs_others	Telencephalic neurons
EYA4	EYA4	3.29166	6.6027	106.879	1.16265e-08	2.08443e-06	clusterTelencephalic neurons_vs_others	Telencephalic neurons
SCN3B4	SCN3B	1.70142	5.50059	53.5641	1.31829e-08	2.33983e-06	clusterTelencephalic neurons_vs_others	Telencephalic neurons
AP003025.11	AP003025.1	4.36881	2.4218	56.1631	1.53503e-08	2.64428e-06	clusterTelencephalic neurons_vs_others	Telencephalic neurons
PDE4D	PDE4D	0.934139	9.47034	57.2822	1.53688e-08	2.64428e-06	clusterTelencephalic neurons_vs_others	Telencephalic neurons
SMPD33	SMPD3	2.46775	5.4122	54.483	1.55342e-08	2.64428e-06	clusterTelencephalic neurons_vs_others	Telencephalic neurons
POT1-AS1	POT1-AS1	1.24815	6.06234	53.8283	1.55409e-08	2.64428e-06	clusterTelencephalic neurons_vs_others	Telencephalic neurons
CSMD3	CSMD3	3.10134	5.68988	93.1179	1.56431e-08	2.64428e-06	clusterTelencephalic neurons_vs_others	Telencephalic neurons
IQSEC35	IQSEC3	2.23587	5.83217	54.2586	1.62278e-08	2.71724e-06	clusterTelencephalic neurons_vs_others	Telencephalic neurons
PHACTR34	PHACTR3	1.3664	6.11126	52.3698	1.68374e-08	2.79296e-06	clusterTelencephalic neurons_vs_others	Telencephalic neurons
LINGO1	LINGO1	2.57845	3.91715	53.0761	2.04661e-08	3.36346e-06	clusterTelencephalic neurons_vs_others	Telencephalic neurons
DPYD-AS1	DPYD-AS1	1.73287	7.80263	82.6964	2.17726e-08	3.54534e-06	clusterTelencephalic neurons_vs_others	Telencephalic neurons
AL024497.2	AL024497.2	4.29565	2.65487	54.6069	2.20676e-08	3.56071e-06	clusterTelencephalic neurons_vs_others	Telencephalic neurons
TSHZ2	TSHZ2	1.41705	7.77921	70.8841	2.23432e-08	3.5727e-06	clusterTelencephalic neurons_vs_others	Telencephalic neurons
LHX5-AS1	LHX5-AS1	5.06776	1.00364	52.2279	2.4221e-08	3.83838e-06	clusterTelencephalic neurons_vs_others	Telencephalic neurons
PLPPR1	PLPPR1	2.1252	6.10175	73.1063	2.94834e-08	4.57736e-06	clusterTelencephalic neurons_vs_others	Telencephalic neurons
MARCH1	MARCH1	1.44562	9.5366	75.6281	2.95773e-08	4.57736e-06	clusterTelencephalic neurons_vs_others	Telencephalic neurons
TNRC6C	TNRC6C	0.812157	7.98143	49.6692	2.96578e-08	4.57736e-06	clusterTelencephalic neurons_vs_others	Telencephalic neurons
PKNOX2	PKNOX2	1.19243	5.37471	49.5289	3.05586e-08	4.63576e-06	clusterTelencephalic neurons_vs_others	Telencephalic neurons
EPS8	EPS8	1.27314	5.68275	49.1804	3.29229e-08	4.95211e-06	clusterTelencephalic neurons_vs_others	Telencephalic neurons
AC068672.2	AC068672.2	5.12552	0.697196	50.5805	3.37624e-08	5.0357e-06	clusterTelencephalic neurons_vs_others	Telencephalic neurons
KCNIP4	KCNIP4	1.86203	8.28188	81.1139	3.46612e-08	5.12668e-06	clusterTelencephalic neurons_vs_others	Telencephalic neurons
ATCAY4	ATCAY	1.19143	6.44518	48.8326	3.54761e-08	5.20384e-06	clusterTelencephalic neurons_vs_others	Telencephalic neurons
NRXN31	NRXN3	0.915625	10.3721	52.0314	3.84715e-08	5.59698e-06	clusterTelencephalic neurons_vs_others	Telencephalic neurons
MIR124-2HG3	MIR124-2HG	1.95621	4.77141	48.2282	4.04237e-08	5.83317e-06	clusterTelencephalic neurons_vs_others	Telencephalic neurons
LHX1	LHX1	6.10117	0.136128	55.8532	4.11304e-08	5.88729e-06	clusterTelencephalic neurons_vs_others	Telencephalic neurons
LHX1-DT	LHX1-DT	4.27025	1.01441	49.5592	4.16215e-08	5.90992e-06	clusterTelencephalic neurons_vs_others	Telencephalic neurons
YAP12	YAP1	1.42527	6.07311	47.8901	4.35039e-08	6.07992e-06	clusterTelencephalic neurons_vs_others	Telencephalic neurons
LIX11	LIX1	2.3819	5.19391	49.4693	4.38804e-08	6.08464e-06	clusterTelencephalic neurons_vs_others	Telencephalic neurons
PPFIA2-AS13	PPFIA2-AS1	1.0743	6.84687	47.7764	4.45951e-08	6.1358e-06	clusterTelencephalic neurons_vs_others	Telencephalic neurons
ANKFN1	ANKFN1	1.79603	4.52178	47.6353	4.59898e-08	6.26792e-06	clusterTelencephalic neurons_vs_others	Telencephalic neurons
KRTAP5-AS1	KRTAP5-AS1	2.88419	4.1073	49.0482	4.62616e-08	6.26792e-06	clusterTelencephalic neurons_vs_others	Telencephalic neurons
GABRB2	GABRB2	2.93296	2.97538	54.4028	5.11359e-08	6.87584e-06	clusterTelencephalic neurons_vs_others	Telencephalic neurons
CLASP2	CLASP2	0.616979	9.46072	46.9621	5.33055e-08	7.11369e-06	clusterTelencephalic neurons_vs_others	Telencephalic neurons
ABLIM34	ABLIM3	1.97041	4.8329	46.8856	5.42128e-08	7.18077e-06	clusterTelencephalic neurons_vs_others	Telencephalic neurons
EEF1A23	EEF1A2	2.58298	4.89468	48.2019	5.51939e-08	7.25656e-06	clusterTelencephalic neurons_vs_others	Telencephalic neurons
TARID	TARID	3.23984	5.33151	77.1236	6.55368e-08	8.49061e-06	clusterTelencephalic neurons_vs_others	Telencephalic neurons
SCG54	SCG5	1.45065	6.59949	45.8263	7.20742e-08	9.26989e-06	clusterTelencephalic neurons_vs_others	Telencephalic neurons
DSCAML11	DSCAML1	1.47198	4.93006	45.347	7.63531e-08	9.74958e-06	clusterTelencephalic neurons_vs_others	Telencephalic neurons
LRRTM4	LRRTM4	1.19606	9.20642	60.2572	7.83445e-08	9.93241e-06	clusterTelencephalic neurons_vs_others	Telencephalic neurons
AC084361.13	AC084361.1	1.31993	6.74798	46.7855	7.94891e-08	1.0006e-05	clusterTelencephalic neurons_vs_others	Telencephalic neurons
ATP1A34	ATP1A3	1.66757	6.23528	45.0827	8.10348e-08	1.01288e-05	clusterTelencephalic neurons_vs_others	Telencephalic neurons
TUBA1A2	TUBA1A	0.761559	9.07201	44.938	8.37243e-08	1.03918e-05	clusterTelencephalic neurons_vs_others	Telencephalic neurons
INA4	INA	2.29765	5.54666	46.1225	8.58601e-08	1.05099e-05	clusterTelencephalic neurons_vs_others	Telencephalic neurons
AL135878.1	AL135878.1	6.80697	0.0518018	51.2008	9.22144e-08	1.12104e-05	clusterTelencephalic neurons_vs_others	Telencephalic neurons
DCX3	DCX	0.98396	8.60479	47.4457	9.49197e-08	1.14607e-05	clusterTelencephalic neurons_vs_others	Telencephalic neurons
CDH8	CDH8	1.97963	4.50586	49.8602	9.86549e-08	1.18148e-05	clusterTelencephalic neurons_vs_others	Telencephalic neurons
LSAMP-AS1	LSAMP-AS1	1.35042	6.24951	50.7738	9.91829e-08	1.18148e-05	clusterTelencephalic neurons_vs_others	Telencephalic neurons
DAO	DAO	1.91407	3.85789	43.7542	1.09623e-07	1.29713e-05	clusterTelencephalic neurons_vs_others	Telencephalic neurons
AP002370.2	AP002370.2	1.90221	6.31676	65.9165	1.26602e-07	1.48812e-05	clusterTelencephalic neurons_vs_others	Telencephalic neurons
DOK6	DOK6	0.94069	8.37728	48.0049	1.2773e-07	1.4915e-05	clusterTelencephalic neurons_vs_others	Telencephalic neurons
UTRN	UTRN	1.02259	7.11806	45.2843	1.48063e-07	1.70647e-05	clusterTelencephalic neurons_vs_others	Telencephalic neurons
TTC9B3	TTC9B	2.56778	5.06058	43.4728	1.53444e-07	1.75708e-05	clusterTelencephalic neurons_vs_others	Telencephalic neurons
AC016822.1	AC016822.1	1.79076	9.22831	71.6236	1.65122e-07	1.87868e-05	clusterTelencephalic neurons_vs_others	Telencephalic neurons
PRDM162	PRDM16	1.46695	5.47365	41.9071	1.68342e-07	1.89809e-05	clusterTelencephalic neurons_vs_others	Telencephalic neurons
ALK	ALK	2.55548	5.76676	70.4638	1.68967e-07	1.89809e-05	clusterTelencephalic neurons_vs_others	Telencephalic neurons
CDH12	CDH12	2.94341	6.6434	74.2529	1.72377e-07	1.92422e-05	clusterTelencephalic neurons_vs_others	Telencephalic neurons
PODXL2	PODXL2	1.16615	6.00063	41.7092	1.7637e-07	1.95649e-05	clusterTelencephalic neurons_vs_others	Telencephalic neurons
GABRA31	GABRA3	1.04116	6.73044	41.3952	1.89948e-07	2.09403e-05	clusterTelencephalic neurons_vs_others	Telencephalic neurons
NTM-AS11	NTM-AS1	3.47212	1.9521	40.751	2.21384e-07	2.42552e-05	clusterTelencephalic neurons_vs_others	Telencephalic neurons
LMO3	LMO3	1.62507	5.79108	49.648	2.28412e-07	2.48717e-05	clusterTelencephalic neurons_vs_others	Telencephalic neurons
DOCK4	DOCK4	0.862838	7.16682	40.5701	2.31171e-07	2.50186e-05	clusterTelencephalic neurons_vs_others	Telencephalic neurons
LINC00901	LINC00901	3.61334	1.76148	41.3977	2.45339e-07	2.6391e-05	clusterTelencephalic neurons_vs_others	Telencephalic neurons
EPB41L3	EPB41L3	1.18195	6.18553	42.6366	2.48674e-07	2.65886e-05	clusterTelencephalic neurons_vs_others	Telencephalic neurons
AL592430.1	AL592430.1	1.38843	5.35406	40.2014	2.52556e-07	2.6842e-05	clusterTelencephalic neurons_vs_others	Telencephalic neurons
ST8SIA4	ST8SIA4	2.53849	4.24293	41.1832	2.57732e-07	2.72291e-05	clusterTelencephalic neurons_vs_others	Telencephalic neurons
AC005355.1	AC005355.1	2.40836	2.55436	39.8297	2.7624e-07	2.89778e-05	clusterTelencephalic neurons_vs_others	Telencephalic neurons
SCG23	SCG2	2.93455	7.52043	62.9181	2.77549e-07	2.89778e-05	clusterTelencephalic neurons_vs_others	Telencephalic neurons
NKX2-11	NKX2-1	1.14583	5.99283	39.5408	2.96271e-07	3.07515e-05	clusterTelencephalic neurons_vs_others	Telencephalic neurons
CXXC4-AS1	CXXC4-AS1	1.4291	4.76727	39.3913	3.07231e-07	3.14962e-05	clusterTelencephalic neurons_vs_others	Telencephalic neurons
AL353784.1	AL353784.1	2.18448	6.97903	66.7049	3.08656e-07	3.14962e-05	clusterTelencephalic neurons_vs_others	Telencephalic neurons
NALCN3	NALCN	1.3649	7.47952	48.3545	3.08769e-07	3.14962e-05	clusterTelencephalic neurons_vs_others	Telencephalic neurons
LINC005994	LINC00599	1.53305	5.58006	39.1176	3.28429e-07	3.31209e-05	clusterTelencephalic neurons_vs_others	Telencephalic neurons
CELF33	CELF3	1.65612	5.23413	38.6865	3.65009e-07	3.6602e-05	clusterTelencephalic neurons_vs_others	Telencephalic neurons
SYCP23	SYCP2	1.34866	5.70509	38.5776	3.74908e-07	3.73834e-05	clusterTelencephalic neurons_vs_others	Telencephalic neurons
KSR21	KSR2	1.02558	7.14622	40.5732	4.02938e-07	3.99539e-05	clusterTelencephalic neurons_vs_others	Telencephalic neurons
NCAM2	NCAM2	1.87644	7.95905	61.1441	4.27645e-07	4.21682e-05	clusterTelencephalic neurons_vs_others	Telencephalic neurons
CHGA3	CHGA	2.80428	4.12634	38.4349	4.9105e-07	4.81527e-05	clusterTelencephalic neurons_vs_others	Telencephalic neurons
DAAM1	DAAM1	0.758262	7.83699	37.241	5.22533e-07	5.09585e-05	clusterTelencephalic neurons_vs_others	Telencephalic neurons
AC005999.2	AC005999.2	2.04752	3.85405	37.91	5.96143e-07	5.75051e-05	clusterTelencephalic neurons_vs_others	Telencephalic neurons
RIMS14	RIMS1	0.747823	8.44793	36.5576	6.20736e-07	5.94886e-05	clusterTelencephalic neurons_vs_others	Telencephalic neurons
AC024996.1	AC024996.1	5.00208	0.85052	38.4817	6.25551e-07	5.94886e-05	clusterTelencephalic neurons_vs_others	Telencephalic neurons
CTNNA24	CTNNA2	0.559231	10.5552	36.5194	6.2676e-07	5.94886e-05	clusterTelencephalic neurons_vs_others	Telencephalic neurons
PCDH15	PCDH15	2.22509	7.237	60.6278	6.43754e-07	6.07765e-05	clusterTelencephalic neurons_vs_others	Telencephalic neurons
CNGB12	CNGB1	2.65688	5.12073	38.4267	7.11475e-07	6.68146e-05	clusterTelencephalic neurons_vs_others	Telencephalic neurons
CALY1	CALY	2.51426	5.50678	44.5676	7.6357e-07	7.13295e-05	clusterTelencephalic neurons_vs_others	Telencephalic neurons
AL390962.1	AL390962.1	5.54667	0.440563	38.539	8.121e-07	7.54657e-05	clusterTelencephalic neurons_vs_others	Telencephalic neurons
AC068931.1	AC068931.1	3.05287	5.98068	52.0664	8.51286e-07	7.86951e-05	clusterTelencephalic neurons_vs_others	Telencephalic neurons
AC069437.1	AC069437.1	1.25151	5.63651	35.2375	8.69938e-07	8.00027e-05	clusterTelencephalic neurons_vs_others	Telencephalic neurons
SEMA3A	SEMA3A	1.92942	6.82688	55.9434	8.91317e-07	8.15463e-05	clusterTelencephalic neurons_vs_others	Telencephalic neurons
SOBP1	SOBP	0.798145	7.69625	35.2224	9.05583e-07	8.24266e-05	clusterTelencephalic neurons_vs_others	Telencephalic neurons
NEFL2	NEFL	2.9271	4.60737	36.0243	9.33532e-07	8.4537e-05	clusterTelencephalic neurons_vs_others	Telencephalic neurons
ZCCHC123	ZCCHC12	2.43381	5.64759	36.5317	9.88474e-07	8.9058e-05	clusterTelencephalic neurons_vs_others	Telencephalic neurons
AC074096.1	AC074096.1	3.24368	1.75901	34.4967	1.05441e-06	9.45185e-05	clusterTelencephalic neurons_vs_others	Telencephalic neurons
DTNA1	DTNA	0.699594	8.58789	34.3822	1.08643e-06	9.68999e-05	clusterTelencephalic neurons_vs_others	Telencephalic neurons
GRID2	GRID2	2.24526	9.4467	55.5758	1.16606e-06	0.000103482	clusterTelencephalic neurons_vs_others	Telencephalic neurons
P2RY14	P2RY14	1.60998	7.01834	50.5728	1.21161e-06	0.00010665	clusterTelencephalic neurons_vs_others	Telencephalic neurons
TUBB32	TUBB3	1.12393	7.73542	39.2973	1.21938e-06	0.00010665	clusterTelencephalic neurons_vs_others	Telencephalic neurons
GLI3	GLI3	2.63084	7.33184	54.4787	1.26337e-06	0.000109919	clusterTelencephalic neurons_vs_others	Telencephalic neurons
TNKS	TNKS	0.625607	8.47072	33.786	1.27061e-06	0.00011001	clusterTelencephalic neurons_vs_others	Telencephalic neurons
MDFIC2	MDFIC	2.13041	4.6962	34.7811	1.30875e-06	0.000112762	clusterTelencephalic neurons_vs_others	Telencephalic neurons
CNR1	CNR1	2.31385	3.89079	37.9743	1.31964e-06	0.000113151	clusterTelencephalic neurons_vs_others	Telencephalic neurons
SFTA32	SFTA3	0.889689	6.80152	33.552	1.35166e-06	0.000115339	clusterTelencephalic neurons_vs_others	Telencephalic neurons
ACHE1	ACHE	3.12072	3.4037	36.1886	1.38419e-06	0.000117551	clusterTelencephalic neurons_vs_others	Telencephalic neurons
TAC1	TAC1	4.07907	0.947552	34.1938	1.39877e-06	0.000117871	clusterTelencephalic neurons_vs_others	Telencephalic neurons
NRK	NRK	8.60937	2.94519	919.782	4.67395e-26	8.2958e-22	clusterUnassigned_vs_others	Unassigned
VIM2	VIM	3.35968	6.64011	641.373	2.05171e-24	1.66411e-20	clusterUnassigned_vs_others	Unassigned
CALD1	CALD1	2.6361	7.98258	629.536	2.81273e-24	1.66411e-20	clusterUnassigned_vs_others	Unassigned
MITF2	MITF	5.82195	4.75238	556.527	5.584e-23	1.98221e-19	clusterUnassigned_vs_others	Unassigned
TLL12	TLL1	5.18136	4.43089	490.786	1.84776e-22	5.46599e-19	clusterUnassigned_vs_others	Unassigned
YAP13	YAP1	3.39067	6.07311	435.938	1.32349e-21	2.93633e-18	clusterUnassigned_vs_others	Unassigned
ARHGAP10	ARHGAP10	4.13867	4.67018	410.472	3.57461e-21	7.04953e-18	clusterUnassigned_vs_others	Unassigned
FBXL72	FBXL7	2.15991	8.3938	403.549	4.72958e-21	8.39452e-18	clusterUnassigned_vs_others	Unassigned
HMCN1	HMCN1	5.3043	2.88148	393.244	7.23413e-21	1.16726e-17	clusterUnassigned_vs_others	Unassigned
GPC62	GPC6	2.06449	9.99917	400.617	7.91657e-21	1.17012e-17	clusterUnassigned_vs_others	Unassigned
NOX4	NOX4	4.34566	5.19834	514.886	8.57037e-21	1.17012e-17	clusterUnassigned_vs_others	Unassigned
AF117829.12	AF117829.1	2.47592	6.9042	374.927	1.5803e-20	2.00348e-17	clusterUnassigned_vs_others	Unassigned
COL25A11	COL25A1	3.1701	8.6383	649.041	3.94851e-20	4.67214e-17	clusterUnassigned_vs_others	Unassigned
DLK1	DLK1	3.37479	8.43611	718.477	4.6233e-20	5.12868e-17	clusterUnassigned_vs_others	Unassigned
MRC22	MRC2	3.74776	5.77949	334.801	9.96447e-20	1.04035e-16	clusterUnassigned_vs_others	Unassigned
FHIT	FHIT	1.90305	8.01905	331.523	1.16838e-19	1.15209e-16	clusterUnassigned_vs_others	Unassigned
NAALADL21	NAALADL2	1.9578	7.75728	325.03	1.60827e-19	1.50237e-16	clusterUnassigned_vs_others	Unassigned
PDE3A1	PDE3A	2.46073	10.4119	462.893	2.37151e-19	2.10459e-16	clusterUnassigned_vs_others	Unassigned
AC016152.1	AC016152.1	6.53922	1.73955	308.473	3.73148e-19	3.15382e-16	clusterUnassigned_vs_others	Unassigned
PARD3B2	PARD3B	2.39997	7.82508	343.156	5.74595e-19	4.51018e-16	clusterUnassigned_vs_others	Unassigned
SLCO1C12	SLCO1C1	3.73955	7.43353	576.777	5.84451e-19	4.51018e-16	clusterUnassigned_vs_others	Unassigned
WWC2	WWC2	2.51473	6.25063	285.143	1.31235e-18	9.70535e-16	clusterUnassigned_vs_others	Unassigned
COL4A1	COL4A1	3.49973	4.20477	259.857	5.71468e-18	3.92368e-15	clusterUnassigned_vs_others	Unassigned
BICC1	BICC1	2.55978	6.77582	327.761	6.29612e-18	4.13888e-15	clusterUnassigned_vs_others	Unassigned
SEMA3E	SEMA3E	4.32068	3.31413	259.575	7.45605e-18	4.43525e-15	clusterUnassigned_vs_others	Unassigned
ITGA1	ITGA1	4.75332	3.45853	255.415	7.49662e-18	4.43525e-15	clusterUnassigned_vs_others	Unassigned
NXN	NXN	1.88166	7.28472	252.364	9.05511e-18	5.18449e-15	clusterUnassigned_vs_others	Unassigned
UACA2	UACA	4.69398	4.30807	250.703	1.00444e-17	5.49891e-15	clusterUnassigned_vs_others	Unassigned
RBMS3-AS2	RBMS3-AS2	4.67089	3.20921	260.41	1.02239e-17	5.49891e-15	clusterUnassigned_vs_others	Unassigned
LIX12	LIX1	4.34743	5.19391	273.984	1.07038e-17	5.58769e-15	clusterUnassigned_vs_others	Unassigned
SPARC2	SPARC	4.59902	5.29583	291.197	2.04077e-17	1.0349e-14	clusterUnassigned_vs_others	Unassigned
RNF217	RNF217	2.476	5.62671	238.566	2.18316e-17	1.07636e-14	clusterUnassigned_vs_others	Unassigned
P3H21	P3H2	3.0339	5.51829	265.806	2.75044e-17	1.3194e-14	clusterUnassigned_vs_others	Unassigned
PAPPA	PAPPA	2.55627	5.59384	230.357	3.76468e-17	1.71331e-14	clusterUnassigned_vs_others	Unassigned
LRIG31	LRIG3	4.28916	4.15087	227.535	4.55789e-17	2.02245e-14	clusterUnassigned_vs_others	Unassigned
MID11	MID1	2.06973	6.92283	234.157	5.63249e-17	2.43832e-14	clusterUnassigned_vs_others	Unassigned
TMTC22	TMTC2	1.7658	8.4097	227.689	6.95742e-17	2.8718e-14	clusterUnassigned_vs_others	Unassigned
GBE1	GBE1	2.1856	6.29827	219.162	8.13865e-17	3.28302e-14	clusterUnassigned_vs_others	Unassigned
OXR1	OXR1	2.7328	5.34617	218.77	8.36657e-17	3.29996e-14	clusterUnassigned_vs_others	Unassigned
TRDN	TRDN	4.6373	2.83184	216.779	9.63224e-17	3.71658e-14	clusterUnassigned_vs_others	Unassigned
TNS32	TNS3	3.02771	5.20343	213.096	1.25377e-16	4.65878e-14	clusterUnassigned_vs_others	Unassigned
ARHGAP29	ARHGAP29	2.6182	6.05215	249.836	1.68693e-16	5.87086e-14	clusterUnassigned_vs_others	Unassigned
MAMDC2	MAMDC2	2.83578	7.65612	389.16	1.83148e-16	6.25133e-14	clusterUnassigned_vs_others	Unassigned
PRDM163	PRDM16	2.83111	5.47365	205.6	2.17041e-16	7.26842e-14	clusterUnassigned_vs_others	Unassigned
SMAD62	SMAD6	4.84086	4.07127	203.899	2.46412e-16	8.09918e-14	clusterUnassigned_vs_others	Unassigned
UTRN1	UTRN	2.16009	7.11806	242.894	2.55757e-16	8.2535e-14	clusterUnassigned_vs_others	Unassigned
COL4A2	COL4A2	2.57808	5.61762	206.226	2.74421e-16	8.39776e-14	clusterUnassigned_vs_others	Unassigned
FST	FST	6.64075	2.69121	230.647	4.17478e-16	1.23497e-13	clusterUnassigned_vs_others	Unassigned
FKBP102	FKBP10	3.20347	5.38626	194.998	4.8605e-16	1.41425e-13	clusterUnassigned_vs_others	Unassigned
DIO21	DIO2	3.75819	4.7217	192.772	5.78459e-16	1.65598e-13	clusterUnassigned_vs_others	Unassigned
COL9A31	COL9A3	4.59442	4.03456	199.633	6.78269e-16	1.8543e-13	clusterUnassigned_vs_others	Unassigned
BMP4	BMP4	7.26163	2.19539	273.684	6.78293e-16	1.8543e-13	clusterUnassigned_vs_others	Unassigned
TIPARP	TIPARP	4.30498	3.61864	219.746	6.79078e-16	1.8543e-13	clusterUnassigned_vs_others	Unassigned
MIR100HG	MIR100HG	1.57082	8.35404	189.774	7.3318e-16	1.9717e-13	clusterUnassigned_vs_others	Unassigned
AC007099.1	AC007099.1	6.34794	2.22798	213.536	7.58433e-16	2.00917e-13	clusterUnassigned_vs_others	Unassigned
CYBRD11	CYBRD1	3.71381	5.0751	187.056	9.11481e-16	2.3791e-13	clusterUnassigned_vs_others	Unassigned
TOM1L2	TOM1L2	1.5382	6.91523	185.71	1.01624e-15	2.60427e-13	clusterUnassigned_vs_others	Unassigned
FSTL11	FSTL1	3.15481	5.05371	191.113	1.02709e-15	2.60427e-13	clusterUnassigned_vs_others	Unassigned
NEAT1	NEAT1	2.07759	8.81184	268.799	1.14325e-15	2.85797e-13	clusterUnassigned_vs_others	Unassigned
PALLD	PALLD	3.18592	8.54407	465.671	1.49163e-15	3.62669e-13	clusterUnassigned_vs_others	Unassigned
AHRR	AHRR	3.46087	3.47213	180.107	1.60996e-15	3.86151e-13	clusterUnassigned_vs_others	Unassigned
GHR	GHR	3.32782	3.83809	179.299	1.72215e-15	4.02189e-13	clusterUnassigned_vs_others	Unassigned
CCN11	CCN1	4.05384	5.12353	190.141	2.2593e-15	5.14106e-13	clusterUnassigned_vs_others	Unassigned
GMDS-DT2	GMDS-DT	1.47484	6.9238	170.612	3.61133e-15	7.91326e-13	clusterUnassigned_vs_others	Unassigned
PCAT1	PCAT1	3.82117	3.66278	189.021	3.92184e-15	8.48887e-13	clusterUnassigned_vs_others	Unassigned
COL1A1	COL1A1	8.53328	1.85244	284.02	3.97911e-15	8.50907e-13	clusterUnassigned_vs_others	Unassigned
ZFP36L12	ZFP36L1	5.52217	3.85111	194.167	4.53353e-15	9.46655e-13	clusterUnassigned_vs_others	Unassigned
IGFBP51	IGFBP5	3.3793	5.77112	236.671	5.67925e-15	1.14547e-12	clusterUnassigned_vs_others	Unassigned
BBOX1-AS1	BBOX1-AS1	3.66701	3.26081	164.188	6.37369e-15	1.25696e-12	clusterUnassigned_vs_others	Unassigned
PTH2R1	PTH2R	3.77011	4.62397	170.097	6.50957e-15	1.26965e-12	clusterUnassigned_vs_others	Unassigned
AC008014.1	AC008014.1	1.56993	6.5607	160.093	9.24378e-15	1.7454e-12	clusterUnassigned_vs_others	Unassigned
PRRX1	PRRX1	6.54495	2.77993	292.169	1.06004e-14	1.9624e-12	clusterUnassigned_vs_others	Unassigned
PRR161	PRR16	3.83328	4.78353	228.45	1.06828e-14	1.9624e-12	clusterUnassigned_vs_others	Unassigned
CDH61	CDH6	2.03667	6.83478	169.38	1.38616e-14	2.48515e-12	clusterUnassigned_vs_others	Unassigned
CAMK2D	CAMK2D	2.227	8.1223	257.542	1.45357e-14	2.57995e-12	clusterUnassigned_vs_others	Unassigned
WNT5A1	WNT5A	5.75007	3.28164	176.218	1.69688e-14	2.98198e-12	clusterUnassigned_vs_others	Unassigned
SULF12	SULF1	3.06997	5.89875	207.345	1.98399e-14	3.43269e-12	clusterUnassigned_vs_others	Unassigned
THBS1	THBS1	4.00182	2.65031	150.998	2.17269e-14	3.70798e-12	clusterUnassigned_vs_others	Unassigned
PDLIM31	PDLIM3	3.82932	4.22356	150.118	2.36534e-14	3.99832e-12	clusterUnassigned_vs_others	Unassigned
MAP3K202	MAP3K20	2.66286	5.09488	148.749	2.70145e-14	4.48112e-12	clusterUnassigned_vs_others	Unassigned
PLPP32	PLPP3	2.94834	4.59299	148.218	2.84524e-14	4.61866e-12	clusterUnassigned_vs_others	Unassigned
CRIM1	CRIM1	2.78723	6.31609	249.082	2.88399e-14	4.61866e-12	clusterUnassigned_vs_others	Unassigned
CDH2	CDH2	1.23378	9.10787	145.595	3.68313e-14	5.78513e-12	clusterUnassigned_vs_others	Unassigned
HMGA21	HMGA2	3.03189	7.07254	264.027	3.91905e-14	6.10169e-12	clusterUnassigned_vs_others	Unassigned
PDGFRB1	PDGFRB	5.11633	3.43056	153.522	4.19001e-14	6.46682e-12	clusterUnassigned_vs_others	Unassigned
MDFIC3	MDFIC	3.84761	4.6962	156.737	4.47376e-14	6.84524e-12	clusterUnassigned_vs_others	Unassigned
FBN1	FBN1	2.52748	4.79765	142.134	5.20836e-14	7.76833e-12	clusterUnassigned_vs_others	Unassigned
MCTP1	MCTP1	2.96228	5.39304	201.789	5.60867e-14	8.29569e-12	clusterUnassigned_vs_others	Unassigned
CCDC146	CCDC146	1.88887	6.17059	139.862	6.5627e-14	9.62656e-12	clusterUnassigned_vs_others	Unassigned
COL8A1	COL8A1	7.88154	6.41415	525.661	6.82295e-14	9.92627e-12	clusterUnassigned_vs_others	Unassigned
FOXP11	FOXP1	1.61361	7.46387	149.024	6.93132e-14	1.0002e-11	clusterUnassigned_vs_others	Unassigned
IGFBP7	IGFBP7	4.45945	3.63181	173.555	7.18735e-14	1.02055e-11	clusterUnassigned_vs_others	Unassigned
RREB12	RREB1	4.31821	3.94633	138.578	7.48896e-14	1.05344e-11	clusterUnassigned_vs_others	Unassigned
FEZ2	FEZ2	1.49156	6.64005	138.515	7.53771e-14	1.05344e-11	clusterUnassigned_vs_others	Unassigned
EDNRB1	EDNRB	4.59019	4.33317	147.097	9.35753e-14	1.27759e-11	clusterUnassigned_vs_others	Unassigned
NEDD4	NEDD4	2.74151	5.49654	167.569	9.78122e-14	1.3152e-11	clusterUnassigned_vs_others	Unassigned
PHACTR2	PHACTR2	1.75461	6.17003	135.601	1.02079e-13	1.36225e-11	clusterUnassigned_vs_others	Unassigned
PRDX62	PRDX6	3.2371	4.41704	135.252	1.05895e-13	1.40263e-11	clusterUnassigned_vs_others	Unassigned
C1orf542	C1orf54	3.51234	4.73394	141.202	1.14796e-13	1.50927e-11	clusterUnassigned_vs_others	Unassigned
GLIS3	GLIS3	3.91773	8.83787	429.438	1.34308e-13	1.72742e-11	clusterUnassigned_vs_others	Unassigned
AC019117.2	AC019117.2	6.79886	1.04028	141.489	2.41262e-13	3.0156e-11	clusterUnassigned_vs_others	Unassigned
SLC35G1	SLC35G1	4.14648	4.54411	202.76	2.72359e-13	3.38048e-11	clusterUnassigned_vs_others	Unassigned
GJA1	GJA1	6.72813	3.00352	184.996	2.83059e-13	3.4889e-11	clusterUnassigned_vs_others	Unassigned
GPC3	GPC3	4.20449	8.73954	408.181	2.99607e-13	3.64228e-11	clusterUnassigned_vs_others	Unassigned
CASC19	CASC19	2.66341	4.38263	125.356	3.09535e-13	3.71212e-11	clusterUnassigned_vs_others	Unassigned
SMC5	SMC5	1.25431	7.83699	124.192	3.52682e-13	4.20118e-11	clusterUnassigned_vs_others	Unassigned
CRYM	CRYM	3.73623	3.33799	123.71	3.72364e-13	4.40605e-11	clusterUnassigned_vs_others	Unassigned
COL5A1	COL5A1	5.1008	2.10321	123.37	3.86924e-13	4.51811e-11	clusterUnassigned_vs_others	Unassigned
TNFRSF10B2	TNFRSF10B	3.11464	4.58785	123.183	3.95206e-13	4.58465e-11	clusterUnassigned_vs_others	Unassigned
SIPA1L1	SIPA1L1	1.86043	7.1257	156.746	4.00568e-13	4.61667e-11	clusterUnassigned_vs_others	Unassigned
LTBP11	LTBP1	2.71171	7.70887	242.391	4.30758e-13	4.9326e-11	clusterUnassigned_vs_others	Unassigned
MAMDC2-AS1	MAMDC2-AS1	3.85275	7.0964	343.089	4.4207e-13	5.02968e-11	clusterUnassigned_vs_others	Unassigned
SOX52	SOX5	1.10881	10.2872	121.548	4.76066e-13	5.34791e-11	clusterUnassigned_vs_others	Unassigned
AC069272.1	AC069272.1	3.90923	5.17272	191.213	4.99969e-13	5.58111e-11	clusterUnassigned_vs_others	Unassigned
MIR181A1HG	MIR181A1HG	2.30417	6.97366	195.61	5.03834e-13	5.5891e-11	clusterUnassigned_vs_others	Unassigned
DOCK12	DOCK1	2.20695	6.31253	140.772	5.51404e-13	6.04128e-11	clusterUnassigned_vs_others	Unassigned
AC079226.2	AC079226.2	2.59335	5.20144	132.537	6.97664e-13	7.59683e-11	clusterUnassigned_vs_others	Unassigned
ACSS31	ACSS3	2.06706	5.18425	117.892	7.27072e-13	7.86878e-11	clusterUnassigned_vs_others	Unassigned
USP53	USP53	2.06445	5.42989	117.454	7.65408e-13	8.18387e-11	clusterUnassigned_vs_others	Unassigned
AC025180.1	AC025180.1	3.31162	3.02666	117.317	7.77799e-13	8.21736e-11	clusterUnassigned_vs_others	Unassigned
APOE	APOE	5.91496	2.0787	131.212	8.31883e-13	8.73674e-11	clusterUnassigned_vs_others	Unassigned
AC083870.1	AC083870.1	2.68901	7.58058	253.236	8.60963e-13	8.98052e-11	clusterUnassigned_vs_others	Unassigned
MYOF	MYOF	4.69223	3.96363	197.809	9.45981e-13	9.64955e-11	clusterUnassigned_vs_others	Unassigned
ANTXR1	ANTXR1	2.1146	7.46195	180.601	9.55253e-13	9.68845e-11	clusterUnassigned_vs_others	Unassigned
TANC1	TANC1	2.83812	6.23591	189.551	1.01734e-12	1.02595e-10	clusterUnassigned_vs_others	Unassigned
FAM160A1	FAM160A1	3.82664	4.53487	179.58	1.03078e-12	1.03363e-10	clusterUnassigned_vs_others	Unassigned
CXCL14	CXCL14	7.05228	1.92245	149.339	1.11829e-12	1.11509e-10	clusterUnassigned_vs_others	Unassigned
BCKDHB2	BCKDHB	1.22177	8.18481	113.732	1.19188e-12	1.17783e-10	clusterUnassigned_vs_others	Unassigned
HES12	HES1	4.53738	4.48263	119.131	1.31385e-12	1.27429e-10	clusterUnassigned_vs_others	Unassigned
CYP1B11	CYP1B1	5.22226	3.38935	124.865	1.3474e-12	1.29634e-10	clusterUnassigned_vs_others	Unassigned
ARHGAP421	ARHGAP42	2.62893	5.23214	112.694	1.35119e-12	1.29634e-10	clusterUnassigned_vs_others	Unassigned
PCDH11X	PCDH11X	3.69781	9.42273	340.583	1.38611e-12	1.32269e-10	clusterUnassigned_vs_others	Unassigned
WWTR1	WWTR1	2.92263	5.86217	176.093	1.4829e-12	1.40749e-10	clusterUnassigned_vs_others	Unassigned
SESN3	SESN3	1.43233	7.83626	119.284	1.5919e-12	1.48708e-10	clusterUnassigned_vs_others	Unassigned
AC002460.21	AC002460.2	3.21278	6.29514	176.264	1.6442e-12	1.5279e-10	clusterUnassigned_vs_others	Unassigned
PDGFC	PDGFC	4.31966	6.41519	320.452	1.81651e-12	1.67053e-10	clusterUnassigned_vs_others	Unassigned
CNTN6	CNTN6	2.83148	7.95785	246.903	2.10704e-12	1.89836e-10	clusterUnassigned_vs_others	Unassigned
CBR4	CBR4	1.73487	8.45282	155.589	2.15959e-12	1.92616e-10	clusterUnassigned_vs_others	Unassigned
PTPN14	PTPN14	3.43168	4.9013	155.46	2.51367e-12	2.20867e-10	clusterUnassigned_vs_others	Unassigned
SMC5-AS1	SMC5-AS1	2.3845	6.55471	168.951	2.56935e-12	2.24647e-10	clusterUnassigned_vs_others	Unassigned
ITPR1	ITPR1	3.06456	4.03213	108.383	2.70551e-12	2.35085e-10	clusterUnassigned_vs_others	Unassigned
DOCK9	DOCK9	2.58444	4.13182	107.054	2.71522e-12	2.35085e-10	clusterUnassigned_vs_others	Unassigned
RBMS3	RBMS3	3.65933	6.31685	269.247	2.75013e-12	2.36227e-10	clusterUnassigned_vs_others	Unassigned
SUCLG21	SUCLG2	2.23587	5.10971	106.939	2.75503e-12	2.36227e-10	clusterUnassigned_vs_others	Unassigned
SERPINH1	SERPINH1	6.0808	3.18422	136.064	3.31706e-12	2.7771e-10	clusterUnassigned_vs_others	Unassigned
PHLDA1	PHLDA1	3.85162	2.16227	103.495	4.27929e-12	3.54921e-10	clusterUnassigned_vs_others	Unassigned
COL11A1	COL11A1	3.18297	6.35601	213.46	4.62741e-12	3.8024e-10	clusterUnassigned_vs_others	Unassigned
MFGE8	MFGE8	3.78977	3.51893	102.568	4.82694e-12	3.91203e-10	clusterUnassigned_vs_others	Unassigned
LAMB2	LAMB2	6.12293	2.96157	125.061	5.02985e-12	4.05795e-10	clusterUnassigned_vs_others	Unassigned
REST2	REST	2.78485	5.40453	117.487	5.08878e-12	4.0685e-10	clusterUnassigned_vs_others	Unassigned
MAP3K5	MAP3K5	3.39582	3.26962	102.122	5.11625e-12	4.07212e-10	clusterUnassigned_vs_others	Unassigned
RASGRF2	RASGRF2	2.59657	6.66657	192.587	5.18249e-12	4.10643e-10	clusterUnassigned_vs_others	Unassigned
PCDH18	PCDH18	4.45948	2.84266	106.997	5.36055e-12	4.22864e-10	clusterUnassigned_vs_others	Unassigned
GPC6-AS11	GPC6-AS1	2.02525	4.93501	101.539	5.52249e-12	4.33711e-10	clusterUnassigned_vs_others	Unassigned
OSBPL10	OSBPL10	2.88222	5.49702	155.352	5.68318e-12	4.42555e-10	clusterUnassigned_vs_others	Unassigned
NPAS3	NPAS3	2.05617	9.27931	182.031	5.68497e-12	4.42555e-10	clusterUnassigned_vs_others	Unassigned
EFNA5	EFNA5	1.05991	10.7184	100.649	6.2097e-12	4.81293e-10	clusterUnassigned_vs_others	Unassigned
ANXA2	ANXA2	2.76025	4.31135	100.746	6.44589e-12	4.97427e-10	clusterUnassigned_vs_others	Unassigned
HERC3	HERC3	2.1262	5.19014	101.441	6.58144e-12	5.05688e-10	clusterUnassigned_vs_others	Unassigned
AC022126.1	AC022126.1	3.31373	3.43318	99.5747	7.16085e-12	5.43154e-10	clusterUnassigned_vs_others	Unassigned
OSBPL8	OSBPL8	1.00522	8.13884	99.4487	7.28214e-12	5.50003e-10	clusterUnassigned_vs_others	Unassigned
ALPK1	ALPK1	3.87789	2.83988	99.2636	7.46427e-12	5.6137e-10	clusterUnassigned_vs_others	Unassigned
ANXA51	ANXA5	3.29545	3.6169	98.3064	8.48618e-12	6.35533e-10	clusterUnassigned_vs_others	Unassigned
SEMA5A2	SEMA5A	2.82512	6.90838	172.292	8.58055e-12	6.399e-10	clusterUnassigned_vs_others	Unassigned
TPM2	TPM2	3.15009	4.07716	98.1089	8.71474e-12	6.47188e-10	clusterUnassigned_vs_others	Unassigned
FGFR2	FGFR2	4.26025	4.68255	133.904	9.46084e-12	6.96765e-10	clusterUnassigned_vs_others	Unassigned
COL4A5	COL4A5	3.50379	7.82319	252.027	9.97584e-12	7.31658e-10	clusterUnassigned_vs_others	Unassigned
EML4	EML4	1.22367	7.86751	97.0375	1.0074e-11	7.35813e-10	clusterUnassigned_vs_others	Unassigned
RGL1	RGL1	1.34775	7.06591	96.7924	1.04153e-11	7.57626e-10	clusterUnassigned_vs_others	Unassigned
RNF145	RNF145	1.43107	6.58791	96.0828	1.14742e-11	8.31251e-10	clusterUnassigned_vs_others	Unassigned
RFTN1	RFTN1	2.43964	5.82681	138.126	1.17475e-11	8.47584e-10	clusterUnassigned_vs_others	Unassigned
PURPL	PURPL	3.52887	4.97725	168.315	1.27162e-11	9.13763e-10	clusterUnassigned_vs_others	Unassigned
TGFB2	TGFB2	4.61835	5.75849	208.169	1.39414e-11	9.89787e-10	clusterUnassigned_vs_others	Unassigned
LDLRAD4	LDLRAD4	1.98831	7.71924	154.797	1.4993e-11	1.0602e-09	clusterUnassigned_vs_others	Unassigned
GAREM11	GAREM1	1.35768	7.35341	95.0457	1.50937e-11	1.06309e-09	clusterUnassigned_vs_others	Unassigned
ZMAT3	ZMAT3	2.28203	4.26641	93.1613	1.71911e-11	1.20603e-09	clusterUnassigned_vs_others	Unassigned
MIR99AHG	MIR99AHG	1.8848	9.06125	150.416	1.98883e-11	1.38431e-09	clusterUnassigned_vs_others	Unassigned
AKT3	AKT3	1.07158	8.87813	91.0128	2.3282e-11	1.60941e-09	clusterUnassigned_vs_others	Unassigned
SDC21	SDC2	3.70945	6.47271	212.351	2.33037e-11	1.60941e-09	clusterUnassigned_vs_others	Unassigned
PRDM52	PRDM5	2.4294	4.96081	90.2489	2.59656e-11	1.7794e-09	clusterUnassigned_vs_others	Unassigned
PCSK51	PCSK5	2.86307	5.22646	122.506	2.6538e-11	1.80469e-09	clusterUnassigned_vs_others	Unassigned
PON21	PON2	1.19188	6.92184	90.0132	2.68584e-11	1.8195e-09	clusterUnassigned_vs_others	Unassigned
TPT1	TPT1	2.95715	3.03286	89.8727	2.74054e-11	1.8495e-09	clusterUnassigned_vs_others	Unassigned
SAT1	SAT1	2.65632	4.08053	89.7778	2.77822e-11	1.86782e-09	clusterUnassigned_vs_others	Unassigned
GLI31	GLI3	4.35082	7.33184	229.779	3.93419e-11	2.5672e-09	clusterUnassigned_vs_others	Unassigned
HIVEP1	HIVEP1	1.29658	6.86692	87.1784	4.05343e-11	2.63532e-09	clusterUnassigned_vs_others	Unassigned
AP002370.21	AP002370.2	2.87046	6.31676	174.29	4.52348e-11	2.91954e-09	clusterUnassigned_vs_others	Unassigned
NACA	NACA	1.51042	5.58619	86.0339	4.79925e-11	3.07516e-09	clusterUnassigned_vs_others	Unassigned
GNG12	GNG12	3.05891	3.96552	100.405	5.15938e-11	3.28222e-09	clusterUnassigned_vs_others	Unassigned
BNC2	BNC2	3.7931	5.25156	178.447	5.21194e-11	3.30381e-09	clusterUnassigned_vs_others	Unassigned
CBLB	CBLB	1.0384	8.03296	85.3766	5.29202e-11	3.34263e-09	clusterUnassigned_vs_others	Unassigned
SLC7A11-AS1	SLC7A11-AS1	3.07654	3.79609	86.3027	5.3397e-11	3.36079e-09	clusterUnassigned_vs_others	Unassigned
SDK11	SDK1	1.0972	9.67681	88.394	5.38228e-11	3.37562e-09	clusterUnassigned_vs_others	Unassigned
NR3C2	NR3C2	3.68846	7.36474	213.254	6.01775e-11	3.74768e-09	clusterUnassigned_vs_others	Unassigned
FOXP2	FOXP2	2.85893	9.20573	197.573	6.16727e-11	3.82737e-09	clusterUnassigned_vs_others	Unassigned
EVA1A	EVA1A	3.72996	2.21114	84.2372	6.27702e-11	3.88191e-09	clusterUnassigned_vs_others	Unassigned
SMAD33	SMAD3	2.49099	5.44575	88.2352	6.35945e-11	3.91923e-09	clusterUnassigned_vs_others	Unassigned
AC093535.11	AC093535.1	2.26344	4.78638	83.8296	6.67492e-11	4.08528e-09	clusterUnassigned_vs_others	Unassigned
PCDH11Y	PCDH11Y	2.4277	3.93458	83.5805	6.93119e-11	4.21307e-09	clusterUnassigned_vs_others	Unassigned
ZFPM2-AS1	ZFPM2-AS1	4.44717	5.28932	202.601	6.97492e-11	4.21804e-09	clusterUnassigned_vs_others	Unassigned

## Sheet: d50_d70_celltype_DEG
	gene	logFC	logCPM	F	PValue	FDR	comparison	cluster
AL133372.2	AL133372.2	4.145	2.4765	519.74	3.68778e-11	3.12903e-07	clusterARC neurons_vs_others	ARC neurons
BRINP1	BRINP1	1.86303	6.09695	510.94	4.07213e-11	3.12903e-07	clusterARC neurons_vs_others	ARC neurons
ANK1	ANK1	2.25551	5.01124	510.499	4.0926e-11	3.12903e-07	clusterARC neurons_vs_others	ARC neurons
IL18R1	IL18R1	3.24435	2.605	456.833	7.79239e-11	3.12903e-07	clusterARC neurons_vs_others	ARC neurons
KCNC2	KCNC2	2.28428	6.56609	416.927	1.32218e-10	3.6462e-07	clusterARC neurons_vs_others	ARC neurons
AC016650.1	AC016650.1	2.66756	5.48284	410.437	1.44759e-10	3.6462e-07	clusterARC neurons_vs_others	ARC neurons
DLGAP2	DLGAP2	2.31766	8.20511	414.485	1.51339e-10	3.6462e-07	clusterARC neurons_vs_others	ARC neurons
GRIN3A	GRIN3A	2.10054	3.95344	367.447	2.73996e-10	5.50116e-07	clusterARC neurons_vs_others	ARC neurons
AC022433.1	AC022433.1	3.50534	5.31142	406.669	3.21705e-10	5.96218e-07	clusterARC neurons_vs_others	ARC neurons
CD163L1	CD163L1	1.55816	5.0045	301.073	8.59787e-10	9.59577e-07	clusterARC neurons_vs_others	ARC neurons
AC008662.1	AC008662.1	4.13705	1.75827	300.939	8.61991e-10	9.59577e-07	clusterARC neurons_vs_others	ARC neurons
AC092422.1	AC092422.1	2.35334	5.92057	306.608	8.63423e-10	9.59577e-07	clusterARC neurons_vs_others	ARC neurons
RDH13	RDH13	1.31165	5.91448	297.756	9.16045e-10	9.59577e-07	clusterARC neurons_vs_others	ARC neurons
AP001605.1	AP001605.1	1.97402	3.78873	286.318	1.14588e-09	1.05256e-06	clusterARC neurons_vs_others	ARC neurons
TNR	TNR	2.51206	5.19777	282.78	1.35504e-09	1.16098e-06	clusterARC neurons_vs_others	ARC neurons
NALCN	NALCN	1.45124	7.40809	273.931	1.47482e-09	1.16098e-06	clusterARC neurons_vs_others	ARC neurons
MYRIP	MYRIP	1.33724	7.27686	271.46	1.55301e-09	1.16927e-06	clusterARC neurons_vs_others	ARC neurons
MARCH11	MARCH11	2.51445	5.60044	281.523	1.60313e-09	1.17043e-06	clusterARC neurons_vs_others	ARC neurons
AC011476.3	AC011476.3	1.47295	6.78885	256.985	2.12159e-09	1.3815e-06	clusterARC neurons_vs_others	ARC neurons
DLGAP2-AS1	DLGAP2-AS1	1.80598	4.09352	247.183	2.64624e-09	1.63779e-06	clusterARC neurons_vs_others	ARC neurons
KCNJ3	KCNJ3	1.64685	6.87508	235.303	3.49916e-09	1.99577e-06	clusterARC neurons_vs_others	ARC neurons
TMEM132D	TMEM132D	3.24922	6.74763	307.809	3.90969e-09	2.1047e-06	clusterARC neurons_vs_others	ARC neurons
CHRNA7	CHRNA7	2.89048	5.79726	279.189	4.01843e-09	2.1047e-06	clusterARC neurons_vs_others	ARC neurons
CPA4	CPA4	2.20769	4.12429	226.866	4.3026e-09	2.17387e-06	clusterARC neurons_vs_others	ARC neurons
OPN4	OPN4	3.9963	1.74472	225.778	4.42119e-09	2.17387e-06	clusterARC neurons_vs_others	ARC neurons
LINC00599	LINC00599	1.79404	5.14174	221.912	4.87466e-09	2.3489e-06	clusterARC neurons_vs_others	ARC neurons
ARFGEF3	ARFGEF3	1.183	8.05631	218.357	5.34016e-09	2.47529e-06	clusterARC neurons_vs_others	ARC neurons
AC023154.1	AC023154.1	1.42778	4.23248	214.897	5.84393e-09	2.60737e-06	clusterARC neurons_vs_others	ARC neurons
AC006058.1	AC006058.1	2.68634	2.76726	211.612	6.37437e-09	2.69291e-06	clusterARC neurons_vs_others	ARC neurons
AC068787.2	AC068787.2	3.49276	1.00985	210.98	6.48276e-09	2.69291e-06	clusterARC neurons_vs_others	ARC neurons
DSCAM	DSCAM	1.85879	9.15826	222.46	7.91249e-09	2.84746e-06	clusterARC neurons_vs_others	ARC neurons
RET	RET	1.75602	2.72011	197.191	9.48307e-09	3.21797e-06	clusterARC neurons_vs_others	ARC neurons
TDO2	TDO2	1.66548	3.43126	194.088	1.03663e-08	3.4213e-06	clusterARC neurons_vs_others	ARC neurons
PCA3	PCA3	2.50363	6.09449	229.761	1.11781e-08	3.5347e-06	clusterARC neurons_vs_others	ARC neurons
KLHL32	KLHL32	1.3211	5.85153	191.302	1.12423e-08	3.5347e-06	clusterARC neurons_vs_others	ARC neurons
WNT10A	WNT10A	2.39514	1.51171	191.137	1.12967e-08	3.5347e-06	clusterARC neurons_vs_others	ARC neurons
LINC02498	LINC02498	5.38449	1.35204	286.341	1.30374e-08	3.78446e-06	clusterARC neurons_vs_others	ARC neurons
DTHD1	DTHD1	3.32171	1.53414	184.485	1.37767e-08	3.8982e-06	clusterARC neurons_vs_others	ARC neurons
AC246817.1	AC246817.1	1.93664	3.10625	183.232	1.43125e-08	3.96357e-06	clusterARC neurons_vs_others	ARC neurons
NELL1	NELL1	2.11012	5.05422	187.565	1.48255e-08	3.96879e-06	clusterARC neurons_vs_others	ARC neurons
AF064866.1	AF064866.1	2.1277	3.20533	180.064	1.57788e-08	4.17757e-06	clusterARC neurons_vs_others	ARC neurons
ARMC4	ARMC4	1.60544	4.07973	179.259	1.61786e-08	4.23687e-06	clusterARC neurons_vs_others	ARC neurons
TMOD1	TMOD1	2.37533	3.84434	176.049	1.79816e-08	4.55589e-06	clusterARC neurons_vs_others	ARC neurons
AP001407.1	AP001407.1	1.98062	3.82867	175.601	1.81532e-08	4.55589e-06	clusterARC neurons_vs_others	ARC neurons
IRAK3	IRAK3	1.96372	3.99294	174.432	1.88428e-08	4.68021e-06	clusterARC neurons_vs_others	ARC neurons
BICDL1	BICDL1	1.52625	7.85774	170.7	2.28112e-08	5.38815e-06	clusterARC neurons_vs_others	ARC neurons
GRIN2B	GRIN2B	1.46954	7.27518	166.431	2.44771e-08	5.7255e-06	clusterARC neurons_vs_others	ARC neurons
BSX	BSX	3.61888	1.12403	163.252	2.72477e-08	6.22381e-06	clusterARC neurons_vs_others	ARC neurons
AC108690.1	AC108690.1	1.65452	3.44458	162.81	2.76612e-08	6.22381e-06	clusterARC neurons_vs_others	ARC neurons
PLD5	PLD5	1.46434	6.6284	162.559	2.7899e-08	6.22381e-06	clusterARC neurons_vs_others	ARC neurons
WNT10B	WNT10B	2.08173	1.80002	161.375	2.90551e-08	6.30652e-06	clusterARC neurons_vs_others	ARC neurons
AIRE	AIRE	2.67054	2.25163	157.615	3.31165e-08	6.99891e-06	clusterARC neurons_vs_others	ARC neurons
ALDH1L2	ALDH1L2	0.971204	5.75534	156.664	3.4246e-08	7.16874e-06	clusterARC neurons_vs_others	ARC neurons
MBNL3	MBNL3	2.23406	5.21404	170.65	3.48127e-08	7.16874e-06	clusterARC neurons_vs_others	ARC neurons
CHAT	CHAT	2.52394	4.17538	162.167	3.91272e-08	7.86824e-06	clusterARC neurons_vs_others	ARC neurons
SYTL5	SYTL5	1.90793	3.64895	152.666	3.95159e-08	7.86824e-06	clusterARC neurons_vs_others	ARC neurons
SKAP2	SKAP2	1.25495	5.09563	150.313	4.30609e-08	8.16902e-06	clusterARC neurons_vs_others	ARC neurons
IGFBP6	IGFBP6	2.42241	3.25488	149.551	4.42882e-08	8.2275e-06	clusterARC neurons_vs_others	ARC neurons
RIN3	RIN3	1.31796	4.80351	148.37	4.62709e-08	8.44549e-06	clusterARC neurons_vs_others	ARC neurons
KCNJ6	KCNJ6	1.84279	5.38925	148.122	5.22223e-08	9.05174e-06	clusterARC neurons_vs_others	ARC neurons
GRM4	GRM4	1.64073	2.92933	144.255	5.40371e-08	9.2083e-06	clusterARC neurons_vs_others	ARC neurons
ICAM5	ICAM5	1.79384	4.44747	144.141	5.42721e-08	9.2083e-06	clusterARC neurons_vs_others	ARC neurons
AL691520.1	AL691520.1	2.68253	2.57689	143.326	5.59947e-08	9.36862e-06	clusterARC neurons_vs_others	ARC neurons
SLC39A11	SLC39A11	1.16279	6.98908	142.043	5.88378e-08	9.50247e-06	clusterARC neurons_vs_others	ARC neurons
GP6	GP6	1.83259	6.42387	154.271	5.91612e-08	9.50247e-06	clusterARC neurons_vs_others	ARC neurons
HSD17B3	HSD17B3	2.53123	5.62454	172.8	6.01491e-08	9.59717e-06	clusterARC neurons_vs_others	ARC neurons
CNTNAP4	CNTNAP4	1.91219	7.50524	164.111	6.12447e-08	9.64423e-06	clusterARC neurons_vs_others	ARC neurons
ADAM22	ADAM22	1.13857	6.89937	139.642	6.46257e-08	9.78274e-06	clusterARC neurons_vs_others	ARC neurons
TMEM144	TMEM144	1.61434	3.42042	139.512	6.49555e-08	9.78274e-06	clusterARC neurons_vs_others	ARC neurons
FRMD7	FRMD7	3.14878	2.00869	137.74	6.96838e-08	1.01723e-05	clusterARC neurons_vs_others	ARC neurons
PLB1	PLB1	1.36793	3.41828	135.669	7.57278e-08	1.07959e-05	clusterARC neurons_vs_others	ARC neurons
PLCXD3	PLCXD3	2.4093	5.70716	159.552	8.49113e-08	1.18253e-05	clusterARC neurons_vs_others	ARC neurons
AC096677.1	AC096677.1	1.80371	3.81723	132.626	8.57584e-08	1.18746e-05	clusterARC neurons_vs_others	ARC neurons
ACVR1	ACVR1	1.1344	6.11351	132.299	8.69245e-08	1.18993e-05	clusterARC neurons_vs_others	ARC neurons
CLDN14	CLDN14	2.55632	2.82429	131.903	8.83617e-08	1.19697e-05	clusterARC neurons_vs_others	ARC neurons
ASIC5	ASIC5	1.73712	2.18298	131.884	8.84328e-08	1.19697e-05	clusterARC neurons_vs_others	ARC neurons
ADK	ADK	0.833393	9.45476	131.227	9.0884e-08	1.22328e-05	clusterARC neurons_vs_others	ARC neurons
AC020892.1	AC020892.1	1.78352	2.37863	130.573	9.3401e-08	1.25017e-05	clusterARC neurons_vs_others	ARC neurons
RARB	RARB	2.03739	6.31364	151.843	9.54935e-08	1.271e-05	clusterARC neurons_vs_others	ARC neurons
AC073525.1	AC073525.1	2.12679	3.36736	129.413	9.80745e-08	1.28476e-05	clusterARC neurons_vs_others	ARC neurons
AC113404.1	AC113404.1	2.88159	3.38696	140.406	9.8118e-08	1.28476e-05	clusterARC neurons_vs_others	ARC neurons
ACSL6	ACSL6	1.37831	5.40312	128.214	1.03192e-07	1.32952e-05	clusterARC neurons_vs_others	ARC neurons
SGCZ	SGCZ	2.00654	6.57654	148.112	1.10527e-07	1.40896e-05	clusterARC neurons_vs_others	ARC neurons
ROBO1	ROBO1	1.91689	9.83867	155.585	1.14923e-07	1.45729e-05	clusterARC neurons_vs_others	ARC neurons
AC002069.2	AC002069.2	1.12593	5.18692	125.203	1.17486e-07	1.48198e-05	clusterARC neurons_vs_others	ARC neurons
AC091860.2	AC091860.2	4.18639	0.919948	124.723	1.19975e-07	1.48685e-05	clusterARC neurons_vs_others	ARC neurons
NR5A2	NR5A2	3.96409	4.28303	168.435	1.22804e-07	1.49078e-05	clusterARC neurons_vs_others	ARC neurons
PHLDA2	PHLDA2	1.99348	3.11756	124.129	1.23133e-07	1.49078e-05	clusterARC neurons_vs_others	ARC neurons
CRTAC1	CRTAC1	1.16593	3.90921	123.123	1.28716e-07	1.53523e-05	clusterARC neurons_vs_others	ARC neurons
HTR5A	HTR5A	1.81281	3.03026	121.868	1.36097e-07	1.61269e-05	clusterARC neurons_vs_others	ARC neurons
AC093010.2	AC093010.2	2.11844	2.2386	121.451	1.38665e-07	1.62177e-05	clusterARC neurons_vs_others	ARC neurons
LURAP1L-AS1	LURAP1L-AS1	1.19801	5.84359	120.476	1.44878e-07	1.67011e-05	clusterARC neurons_vs_others	ARC neurons
AL512622.1	AL512622.1	1.75061	3.5674	119.47	1.51627e-07	1.72107e-05	clusterARC neurons_vs_others	ARC neurons
ANKRD34B	ANKRD34B	1.99908	1.30444	119.009	1.5485e-07	1.74337e-05	clusterARC neurons_vs_others	ARC neurons
LINC01630	LINC01630	2.77684	5.37655	150.072	1.58368e-07	1.75833e-05	clusterARC neurons_vs_others	ARC neurons
AP001604.1	AP001604.1	2.41907	2.72857	117.904	1.62893e-07	1.79204e-05	clusterARC neurons_vs_others	ARC neurons
NPTX2	NPTX2	2.04677	3.10262	117.244	1.67925e-07	1.83901e-05	clusterARC neurons_vs_others	ARC neurons
TMEM132E	TMEM132E	1.90563	2.90633	117.061	1.6936e-07	1.84633e-05	clusterARC neurons_vs_others	ARC neurons
WDR90	WDR90	1.16908	3.65973	116.712	1.72121e-07	1.85943e-05	clusterARC neurons_vs_others	ARC neurons
AC115485.1	AC115485.1	3.17795	1.18881	115.509	1.8206e-07	1.93232e-05	clusterARC neurons_vs_others	ARC neurons
CPE	CPE	0.716615	8.13336	114.83	1.87966e-07	1.98626e-05	clusterARC neurons_vs_others	ARC neurons
AC084361.1	AC084361.1	1.27977	6.6885	114.567	1.90314e-07	2.00228e-05	clusterARC neurons_vs_others	ARC neurons
EIF4E1B	EIF4E1B	1.61746	2.26205	113.674	1.98547e-07	2.07082e-05	clusterARC neurons_vs_others	ARC neurons
ADCY8	ADCY8	2.00158	3.18372	113.57	1.99532e-07	2.07212e-05	clusterARC neurons_vs_others	ARC neurons
RABGEF1	RABGEF1	0.839864	9.02538	112.287	2.12172e-07	2.16604e-05	clusterARC neurons_vs_others	ARC neurons
HRH1	HRH1	1.74453	3.66964	111.272	2.22842e-07	2.24641e-05	clusterARC neurons_vs_others	ARC neurons
PPP1R14C	PPP1R14C	1.69784	4.63819	111.615	2.32589e-07	2.32522e-05	clusterARC neurons_vs_others	ARC neurons
RCAN3	RCAN3	1.55203	6.26763	116.583	2.34262e-07	2.33226e-05	clusterARC neurons_vs_others	ARC neurons
AC106744.1	AC106744.1	3.28848	2.38893	116.673	2.51933e-07	2.47265e-05	clusterARC neurons_vs_others	ARC neurons
PCLO	PCLO	0.811913	10.0647	108.421	2.56319e-07	2.48012e-05	clusterARC neurons_vs_others	ARC neurons
ZFYVE28	ZFYVE28	0.980018	5.17701	108.149	2.59817e-07	2.49394e-05	clusterARC neurons_vs_others	ARC neurons
AC026369.3	AC026369.3	1.51024	2.72577	107.998	2.61783e-07	2.50283e-05	clusterARC neurons_vs_others	ARC neurons
NTNG1	NTNG1	2.1076	6.38825	132.358	2.66863e-07	2.53131e-05	clusterARC neurons_vs_others	ARC neurons
PCDH11X	PCDH11X	0.870438	7.76593	106.246	2.85865e-07	2.6799e-05	clusterARC neurons_vs_others	ARC neurons
PRUNE2	PRUNE2	2.10915	6.8668	130.689	2.9221e-07	2.71645e-05	clusterARC neurons_vs_others	ARC neurons
VWC2	VWC2	2.44325	5.42919	127.691	3.2205e-07	2.90605e-05	clusterARC neurons_vs_others	ARC neurons
GRM7	GRM7	2.01798	7.05075	127.185	3.28373e-07	2.92412e-05	clusterARC neurons_vs_others	ARC neurons
GNAS	GNAS	0.69522	9.15575	103.507	3.28907e-07	2.92412e-05	clusterARC neurons_vs_others	ARC neurons
LINC02131	LINC02131	3.15543	0.767829	102.553	3.45641e-07	3.02819e-05	clusterARC neurons_vs_others	ARC neurons
GABBR2	GABBR2	1.19458	5.7569	102.046	3.54948e-07	3.07145e-05	clusterARC neurons_vs_others	ARC neurons
GPR26	GPR26	1.65661	2.49868	102.025	3.5533e-07	3.07145e-05	clusterARC neurons_vs_others	ARC neurons
HCN3	HCN3	1.33544	4.43344	102.007	3.55678e-07	3.07145e-05	clusterARC neurons_vs_others	ARC neurons
SLC16A7	SLC16A7	0.792451	5.5347	101.328	3.68622e-07	3.14882e-05	clusterARC neurons_vs_others	ARC neurons
AC016642.1	AC016642.1	1.58831	6.71273	111.654	3.70938e-07	3.14882e-05	clusterARC neurons_vs_others	ARC neurons
SGMS2	SGMS2	1.56493	4.32996	101.197	3.71172e-07	3.14882e-05	clusterARC neurons_vs_others	ARC neurons
AL355512.1	AL355512.1	1.4559	2.51509	100.949	3.76079e-07	3.16814e-05	clusterARC neurons_vs_others	ARC neurons
SCAT8	SCAT8	2.71199	0.750767	100.807	3.7893e-07	3.18103e-05	clusterARC neurons_vs_others	ARC neurons
IDH2-DT	IDH2-DT	1.4568	3.06253	100.239	3.90563e-07	3.21872e-05	clusterARC neurons_vs_others	ARC neurons
ACP5	ACP5	2.47357	3.43442	107.619	4.04283e-07	3.27959e-05	clusterARC neurons_vs_others	ARC neurons
LINC01497	LINC01497	4.11542	0.156909	99.001	4.17377e-07	3.37434e-05	clusterARC neurons_vs_others	ARC neurons
AC007535.1	AC007535.1	1.52672	4.15201	98.677	4.24747e-07	3.40927e-05	clusterARC neurons_vs_others	ARC neurons
AL592182.2	AL592182.2	2.08763	1.54245	98.1676	4.36643e-07	3.47196e-05	clusterARC neurons_vs_others	ARC neurons
AC011365.1	AC011365.1	2.22943	2.02135	97.9896	4.40892e-07	3.49421e-05	clusterARC neurons_vs_others	ARC neurons
NIPAL1	NIPAL1	1.1141	4.38672	97.8867	4.43369e-07	3.50233e-05	clusterARC neurons_vs_others	ARC neurons
GAL	GAL	2.47039	0.900883	97.5249	4.52213e-07	3.56051e-05	clusterARC neurons_vs_others	ARC neurons
LINC01583	LINC01583	2.92058	1.92601	98.4159	4.56748e-07	3.56131e-05	clusterARC neurons_vs_others	ARC neurons
CELSR3	CELSR3	1.33656	3.8619	97.1031	4.62786e-07	3.57369e-05	clusterARC neurons_vs_others	ARC neurons
WDPCP	WDPCP	0.756788	9.20153	96.7103	4.72892e-07	3.62891e-05	clusterARC neurons_vs_others	ARC neurons
AL133372.3	AL133372.3	2.45345	1.84451	96.708	4.7295e-07	3.62891e-05	clusterARC neurons_vs_others	ARC neurons
FMN1	FMN1	2.70498	7.51624	137.384	4.79001e-07	3.66367e-05	clusterARC neurons_vs_others	ARC neurons
GALNT17	GALNT17	0.992091	5.98913	96.3793	4.81608e-07	3.67196e-05	clusterARC neurons_vs_others	ARC neurons
AL390198.1	AL390198.1	0.695029	5.63838	96.2181	4.85921e-07	3.69315e-05	clusterARC neurons_vs_others	ARC neurons
LINC02085	LINC02085	2.85966	0.465441	96.0659	4.90034e-07	3.7127e-05	clusterARC neurons_vs_others	ARC neurons
AP000695.2	AP000695.2	2.59627	1.66541	95.809	4.9707e-07	3.72457e-05	clusterARC neurons_vs_others	ARC neurons
LINC01976	LINC01976	2.31364	1.5933	95.7498	4.98709e-07	3.72457e-05	clusterARC neurons_vs_others	ARC neurons
AC066612.1	AC066612.1	1.60826	1.86448	95.5753	5.03572e-07	3.73489e-05	clusterARC neurons_vs_others	ARC neurons
STK32A	STK32A	1.2935	7.0022	98.5281	5.13385e-07	3.73489e-05	clusterARC neurons_vs_others	ARC neurons
MX2	MX2	1.89447	2.66611	95.1854	5.14646e-07	3.73489e-05	clusterARC neurons_vs_others	ARC neurons
TRPC5	TRPC5	1.58392	6.0639	102.687	5.14651e-07	3.73489e-05	clusterARC neurons_vs_others	ARC neurons
DUSP5	DUSP5	2.57653	2.06833	95.1309	5.16216e-07	3.73489e-05	clusterARC neurons_vs_others	ARC neurons
AC083855.2	AC083855.2	1.84155	2.55751	94.7647	5.26913e-07	3.80088e-05	clusterARC neurons_vs_others	ARC neurons
FAM155A	FAM155A	0.759477	11.6523	94.6903	5.29121e-07	3.80541e-05	clusterARC neurons_vs_others	ARC neurons
ANO10	ANO10	0.76982	8.25186	94.5753	5.3255e-07	3.81867e-05	clusterARC neurons_vs_others	ARC neurons
AP5Z1	AP5Z1	0.894342	4.84451	94.1463	5.45573e-07	3.8889e-05	clusterARC neurons_vs_others	ARC neurons
CDHR1	CDHR1	1.50109	3.04998	92.3653	6.03786e-07	4.19222e-05	clusterARC neurons_vs_others	ARC neurons
OPCML	OPCML	2.73306	8.8446	129.867	6.18831e-07	4.23565e-05	clusterARC neurons_vs_others	ARC neurons
CUTA	CUTA	0.99241	5.71504	91.8156	6.23198e-07	4.24144e-05	clusterARC neurons_vs_others	ARC neurons
AC003991.1	AC003991.1	1.08564	4.86654	91.4902	6.35032e-07	4.28567e-05	clusterARC neurons_vs_others	ARC neurons
LINC02197	LINC02197	1.93912	2.01497	90.5732	6.69824e-07	4.4828e-05	clusterARC neurons_vs_others	ARC neurons
FSTL4	FSTL4	1.79858	5.26156	99.6544	6.79917e-07	4.51749e-05	clusterARC neurons_vs_others	ARC neurons
RNF207	RNF207	1.70052	3.44225	90.1907	6.84992e-07	4.53394e-05	clusterARC neurons_vs_others	ARC neurons
CEP70	CEP70	0.893986	6.6932	89.9451	6.94944e-07	4.5872e-05	clusterARC neurons_vs_others	ARC neurons
SLFN13	SLFN13	2.5007	0.706823	89.5198	7.12575e-07	4.6663e-05	clusterARC neurons_vs_others	ARC neurons
LINC02789	LINC02789	2.27727	2.33855	89.4073	7.17328e-07	4.67904e-05	clusterARC neurons_vs_others	ARC neurons
AL161938.1	AL161938.1	2.60588	0.743234	89.3781	7.18568e-07	4.67904e-05	clusterARC neurons_vs_others	ARC neurons
LINC01522	LINC01522	2.32303	0.983333	89.3296	7.20629e-07	4.67982e-05	clusterARC neurons_vs_others	ARC neurons
AC026774.1	AC026774.1	3.16083	0.945002	88.7609	7.45358e-07	4.79521e-05	clusterARC neurons_vs_others	ARC neurons
SH3GL3	SH3GL3	1.24474	5.88379	88.6432	7.50598e-07	4.79686e-05	clusterARC neurons_vs_others	ARC neurons
STAMBPL1	STAMBPL1	1.40417	3.76038	88.2449	7.68656e-07	4.88502e-05	clusterARC neurons_vs_others	ARC neurons
CHRM2	CHRM2	1.93445	3.1073	88.1707	7.72073e-07	4.88502e-05	clusterARC neurons_vs_others	ARC neurons
IFI16	IFI16	1.87608	1.96677	88.1614	7.72503e-07	4.88502e-05	clusterARC neurons_vs_others	ARC neurons
AC131571.1	AC131571.1	0.750298	8.00743	88.0688	7.76797e-07	4.88652e-05	clusterARC neurons_vs_others	ARC neurons
NMRK1	NMRK1	1.03188	3.92358	87.1377	8.21577e-07	5.0885e-05	clusterARC neurons_vs_others	ARC neurons
LONRF3	LONRF3	1.40524	2.14544	86.2238	8.68491e-07	5.35155e-05	clusterARC neurons_vs_others	ARC neurons
SLC6A17	SLC6A17	1.43877	4.68238	86.1453	8.72666e-07	5.36356e-05	clusterARC neurons_vs_others	ARC neurons
ITPRID2	ITPRID2	0.835825	5.66578	85.4462	9.10888e-07	5.5671e-05	clusterARC neurons_vs_others	ARC neurons
AP001599.1	AP001599.1	2.46658	3.16668	91.9028	9.22315e-07	5.56757e-05	clusterARC neurons_vs_others	ARC neurons
Z94057.1	Z94057.1	2.09689	1.95673	85.2081	9.24347e-07	5.56757e-05	clusterARC neurons_vs_others	ARC neurons
EPOR	EPOR	1.43141	4.48215	85.1581	9.27205e-07	5.57086e-05	clusterARC neurons_vs_others	ARC neurons
AP001993.1	AP001993.1	2.18974	1.2044	85.0527	9.33262e-07	5.5933e-05	clusterARC neurons_vs_others	ARC neurons
NOS3	NOS3	1.64369	1.61515	85.0078	9.35853e-07	5.59491e-05	clusterARC neurons_vs_others	ARC neurons
PTPRH	PTPRH	1.62217	2.9884	84.957	9.388e-07	5.59864e-05	clusterARC neurons_vs_others	ARC neurons
HS6ST3	HS6ST3	2.492	8.18562	118.357	9.42255e-07	5.60537e-05	clusterARC neurons_vs_others	ARC neurons
ATP8B4	ATP8B4	1.28374	3.08865	84.7008	9.53817e-07	5.66018e-05	clusterARC neurons_vs_others	ARC neurons
RECQL4	RECQL4	1.87078	2.417	84.1287	9.88371e-07	5.82221e-05	clusterARC neurons_vs_others	ARC neurons
AC079949.6	AC079949.6	2.44171	1.09812	83.4428	1.03175e-06	6.02548e-05	clusterARC neurons_vs_others	ARC neurons
SCFD2	SCFD2	1.34888	9.6273	94.5174	1.03894e-06	6.03159e-05	clusterARC neurons_vs_others	ARC neurons
LINC00927	LINC00927	1.92069	2.10941	83.2881	1.04184e-06	6.03388e-05	clusterARC neurons_vs_others	ARC neurons
RHCE	RHCE	0.741932	4.56497	82.2331	1.1138e-06	6.3381e-05	clusterARC neurons_vs_others	ARC neurons
GOLGA7B	GOLGA7B	1.9198	3.71179	83.5137	1.11467e-06	6.3381e-05	clusterARC neurons_vs_others	ARC neurons
DGKK	DGKK	1.25907	5.01194	82.1745	1.11796e-06	6.3381e-05	clusterARC neurons_vs_others	ARC neurons
DNM3	DNM3	0.850619	8.88535	82.1401	1.12042e-06	6.3381e-05	clusterARC neurons_vs_others	ARC neurons
CACNA1B	CACNA1B	1.50674	8.76786	94.6429	1.14714e-06	6.4726e-05	clusterARC neurons_vs_others	ARC neurons
UPP1	UPP1	1.11635	3.98674	81.6014	1.15967e-06	6.52801e-05	clusterARC neurons_vs_others	ARC neurons
AC009498.1	AC009498.1	4.60099	-0.24444	81.3498	1.17854e-06	6.6188e-05	clusterARC neurons_vs_others	ARC neurons
PALM2-AKAP2	PALM2-AKAP2	1.1853	6.43155	81.8885	1.23435e-06	6.83041e-05	clusterARC neurons_vs_others	ARC neurons
TUNAR	TUNAR	1.82012	3.2965	80.6114	1.23607e-06	6.83041e-05	clusterARC neurons_vs_others	ARC neurons
DAPK3	DAPK3	0.870887	5.528	80.4463	1.24937e-06	6.85675e-05	clusterARC neurons_vs_others	ARC neurons
MROH1	MROH1	0.927162	6.14991	80.3606	1.25635e-06	6.87935e-05	clusterARC neurons_vs_others	ARC neurons
TMC3-AS1	TMC3-AS1	1.11407	4.91322	80.1952	1.26993e-06	6.93129e-05	clusterARC neurons_vs_others	ARC neurons
SLC18A1	SLC18A1	4.39391	2.56443	446.763	8.86564e-11	1.11627e-06	clusterImmature ARC neurons_vs_others	Immature ARC neurons
AC112487.1	AC112487.1	1.63334	7.00551	443.364	9.26631e-11	1.11627e-06	clusterImmature ARC neurons_vs_others	Immature ARC neurons
KCNJ31	KCNJ3	1.93007	6.87508	322.44	5.80535e-10	4.66228e-06	clusterImmature ARC neurons_vs_others	Immature ARC neurons
ST18	ST18	2.77064	5.33257	289.473	1.71947e-09	7.44702e-06	clusterImmature ARC neurons_vs_others	Immature ARC neurons
KCNIP1	KCNIP1	1.28212	6.12385	252.638	2.33765e-09	7.44702e-06	clusterImmature ARC neurons_vs_others	Immature ARC neurons
NRXN1	NRXN1	0.990481	10.2331	250.152	2.47276e-09	7.44702e-06	clusterImmature ARC neurons_vs_others	Immature ARC neurons
AC068308.1	AC068308.1	1.81894	6.27119	244.168	2.83715e-09	7.59505e-06	clusterImmature ARC neurons_vs_others	Immature ARC neurons
AC084361.11	AC084361.1	1.83654	6.6885	239.157	3.19133e-09	7.68886e-06	clusterImmature ARC neurons_vs_others	Immature ARC neurons
MYO16	MYO16	2.00416	6.91859	236.376	4.66965e-09	9.36959e-06	clusterImmature ARC neurons_vs_others	Immature ARC neurons
GRIP2	GRIP2	1.25917	5.67803	221.858	4.88132e-09	9.36959e-06	clusterImmature ARC neurons_vs_others	Immature ARC neurons
AC069228.1	AC069228.1	1.63334	7.94697	220.485	5.05561e-09	9.36959e-06	clusterImmature ARC neurons_vs_others	Immature ARC neurons
TMEM196	TMEM196	1.13343	7.40735	216.305	5.63259e-09	9.69328e-06	clusterImmature ARC neurons_vs_others	Immature ARC neurons
PPFIA2	PPFIA2	1.44891	8.34653	189.514	1.185e-08	1.78439e-05	clusterImmature ARC neurons_vs_others	Immature ARC neurons
AC015878.1	AC015878.1	1.19117	5.48356	172.244	2.02171e-08	2.77232e-05	clusterImmature ARC neurons_vs_others	Immature ARC neurons
MYO16-AS1	MYO16-AS1	2.15173	3.86526	171.086	2.09918e-08	2.77232e-05	clusterImmature ARC neurons_vs_others	Immature ARC neurons
NALCN1	NALCN	1.16551	7.40809	169.842	2.18628e-08	2.77232e-05	clusterImmature ARC neurons_vs_others	Immature ARC neurons
AC091646.1	AC091646.1	1.75425	3.85824	163.01	2.74733e-08	3.21367e-05	clusterImmature ARC neurons_vs_others	Immature ARC neurons
GRIN2B1	GRIN2B	1.46598	7.27518	162.442	2.80111e-08	3.21367e-05	clusterImmature ARC neurons_vs_others	Immature ARC neurons
ABO	ABO	1.59521	4.12784	160.037	3.04302e-08	3.33252e-05	clusterImmature ARC neurons_vs_others	Immature ARC neurons
AC027312.1	AC027312.1	1.3182	3.87198	156.937	3.39176e-08	3.47827e-05	clusterImmature ARC neurons_vs_others	Immature ARC neurons
NNAT	NNAT	1.49316	7.62236	158.465	3.46484e-08	3.47827e-05	clusterImmature ARC neurons_vs_others	Immature ARC neurons
SLC8A1-AS1	SLC8A1-AS1	1.44768	8.5043	157.838	3.62841e-08	3.49677e-05	clusterImmature ARC neurons_vs_others	Immature ARC neurons
SLC8A1	SLC8A1	1.38155	9.49548	151.75	4.5747e-08	4.11047e-05	clusterImmature ARC neurons_vs_others	Immature ARC neurons
KCNH7	KCNH7	1.58883	8.65284	158.262	4.60643e-08	4.11047e-05	clusterImmature ARC neurons_vs_others	Immature ARC neurons
CNGB1	CNGB1	1.87454	4.12104	146.189	5.02114e-08	4.18122e-05	clusterImmature ARC neurons_vs_others	Immature ARC neurons
LINC02398	LINC02398	1.36051	4.71438	146.127	5.03281e-08	4.18122e-05	clusterImmature ARC neurons_vs_others	Immature ARC neurons
LINC005991	LINC00599	1.49895	5.14174	142.677	5.7412e-08	4.53717e-05	clusterImmature ARC neurons_vs_others	Immature ARC neurons
NELL2	NELL2	1.75576	6.27468	150.239	5.83788e-08	4.53717e-05	clusterImmature ARC neurons_vs_others	Immature ARC neurons
SCML4	SCML4	1.76427	3.20231	140.754	6.18647e-08	4.53814e-05	clusterImmature ARC neurons_vs_others	Immature ARC neurons
AL024495.1	AL024495.1	1.95299	3.21452	140.633	6.21585e-08	4.53814e-05	clusterImmature ARC neurons_vs_others	Immature ARC neurons
PPFIA2-AS1	PPFIA2-AS1	1.7336	5.8903	142.6	6.89305e-08	4.87159e-05	clusterImmature ARC neurons_vs_others	Immature ARC neurons
FAM155A1	FAM155A	0.908326	11.6523	136.983	7.18253e-08	4.87159e-05	clusterImmature ARC neurons_vs_others	Immature ARC neurons
AC132153.1	AC132153.1	2.55323	3.27224	137.19	8.04342e-08	5.23757e-05	clusterImmature ARC neurons_vs_others	Immature ARC neurons
DCC	DCC	0.985176	7.87222	131.122	9.12811e-08	5.78746e-05	clusterImmature ARC neurons_vs_others	Immature ARC neurons
DDC	DDC	2.11261	2.23343	129.286	9.86033e-08	6.09141e-05	clusterImmature ARC neurons_vs_others	Immature ARC neurons
SOX2-OT	SOX2-OT	1.53905	8.39896	137.209	1.09986e-07	6.46317e-05	clusterImmature ARC neurons_vs_others	Immature ARC neurons
AC011900.1	AC011900.1	1.60737	6.08088	128.641	1.20857e-07	6.62136e-05	clusterImmature ARC neurons_vs_others	Immature ARC neurons
PPM1E	PPM1E	1.0068	8.1881	123.197	1.28296e-07	6.62136e-05	clusterImmature ARC neurons_vs_others	Immature ARC neurons
RASSF8	RASSF8	1.03724	7.31478	122.959	1.29653e-07	6.62136e-05	clusterImmature ARC neurons_vs_others	Immature ARC neurons
ANKS1B	ANKS1B	0.792962	7.94088	122.569	1.31916e-07	6.62136e-05	clusterImmature ARC neurons_vs_others	Immature ARC neurons
AC090150.1	AC090150.1	1.82142	3.54354	120.276	1.46192e-07	7.18817e-05	clusterImmature ARC neurons_vs_others	Immature ARC neurons
C19orf85	C19orf85	3.31839	0.0501598	118.474	1.58686e-07	7.64642e-05	clusterImmature ARC neurons_vs_others	Immature ARC neurons
SLC6A171	SLC6A17	1.70375	4.68238	115.34	1.83511e-07	8.34212e-05	clusterImmature ARC neurons_vs_others	Immature ARC neurons
GNA14-AS1	GNA14-AS1	1.84501	3.00134	112.631	2.08693e-07	9.14187e-05	clusterImmature ARC neurons_vs_others	Immature ARC neurons
C1orf226	C1orf226	2.10373	2.09346	110.589	2.30367e-07	9.91111e-05	clusterImmature ARC neurons_vs_others	Immature ARC neurons
TSHZ2	TSHZ2	0.914515	7.2734	108.339	2.5737e-07	0.000108786	clusterImmature ARC neurons_vs_others	Immature ARC neurons
AL590302.2	AL590302.2	0.760678	6.7976	107.96	2.62274e-07	0.000108822	clusterImmature ARC neurons_vs_others	Immature ARC neurons
AC009234.1	AC009234.1	1.66975	2.74443	107.641	2.66489e-07	0.000108822	clusterImmature ARC neurons_vs_others	Immature ARC neurons
ASCL1	ASCL1	3.48754	1.61327	106.286	3.06369e-07	0.000123023	clusterImmature ARC neurons_vs_others	Immature ARC neurons
RNF112	RNF112	1.22946	3.56688	102.996	3.37741e-07	0.000133397	clusterImmature ARC neurons_vs_others	Immature ARC neurons
SKOR2	SKOR2	3.37564	-0.0565904	101.122	3.72649e-07	0.00014481	clusterImmature ARC neurons_vs_others	Immature ARC neurons
JPH4	JPH4	1.18797	5.65068	100.052	3.94479e-07	0.00015086	clusterImmature ARC neurons_vs_others	Immature ARC neurons
AP001605.11	AP001605.1	1.25263	3.78873	98.7954	4.22035e-07	0.000153274	clusterImmature ARC neurons_vs_others	Immature ARC neurons
AC020892.11	AC020892.1	1.69434	2.37863	98.6122	4.26238e-07	0.000153274	clusterImmature ARC neurons_vs_others	Immature ARC neurons
DISP3	DISP3	1.6061	3.07593	97.396	4.55414e-07	0.000161357	clusterImmature ARC neurons_vs_others	Immature ARC neurons
ACSL61	ACSL6	1.23605	5.40312	96.703	4.73083e-07	0.000165188	clusterImmature ARC neurons_vs_others	Immature ARC neurons
FRMD5	FRMD5	0.936499	8.58605	95.9252	4.93872e-07	0.000166193	clusterImmature ARC neurons_vs_others	Immature ARC neurons
CAMK2A	CAMK2A	0.933866	4.23635	95.6314	5.02003e-07	0.000166193	clusterImmature ARC neurons_vs_others	Immature ARC neurons
AC021915.2	AC021915.2	3.23445	0.442753	95.576	5.03554e-07	0.000166193	clusterImmature ARC neurons_vs_others	Immature ARC neurons
CNTNAP41	CNTNAP4	1.58038	7.50524	107.64	5.25045e-07	0.000170945	clusterImmature ARC neurons_vs_others	Immature ARC neurons
LDB2	LDB2	1.03262	6.8297	93.5917	5.62969e-07	0.00017854	clusterImmature ARC neurons_vs_others	Immature ARC neurons
BICDL11	BICDL1	1.15893	7.85774	94.502	5.63195e-07	0.00017854	clusterImmature ARC neurons_vs_others	Immature ARC neurons
DGKK1	DGKK	1.37085	5.01194	92.8622	5.86844e-07	0.000183621	clusterImmature ARC neurons_vs_others	Immature ARC neurons
PCDH9-AS2	PCDH9-AS2	1.06746	8.14104	91.5928	6.31272e-07	0.00019499	clusterImmature ARC neurons_vs_others	Immature ARC neurons
SOX1-OT	SOX1-OT	1.57248	4.09749	90.2187	6.83869e-07	0.000208563	clusterImmature ARC neurons_vs_others	Immature ARC neurons
DISP2	DISP2	1.68297	3.00131	89.1345	7.29005e-07	0.000218901	clusterImmature ARC neurons_vs_others	Immature ARC neurons
ENOX2	ENOX2	1.09856	5.76386	88.6666	7.49554e-07	0.000218901	clusterImmature ARC neurons_vs_others	Immature ARC neurons
PTPRN2	PTPRN2	1.26808	8.87301	94.2219	7.75487e-07	0.000222426	clusterImmature ARC neurons_vs_others	Immature ARC neurons
AL354994.1	AL354994.1	2.11201	1.6135	86.2565	8.66759e-07	0.000242824	clusterImmature ARC neurons_vs_others	Immature ARC neurons
SLC6A1-AS1	SLC6A1-AS1	1.29991	3.85088	85.6823	8.97767e-07	0.000244951	clusterImmature ARC neurons_vs_others	Immature ARC neurons
GREB1L	GREB1L	0.824588	7.53423	85.6051	9.0203e-07	0.000244951	clusterImmature ARC neurons_vs_others	Immature ARC neurons
GPR261	GPR26	1.63034	2.49868	84.8241	9.46556e-07	0.000253393	clusterImmature ARC neurons_vs_others	Immature ARC neurons
GPR139	GPR139	1.42849	1.71679	84.4621	9.68059e-07	0.000254702	clusterImmature ARC neurons_vs_others	Immature ARC neurons
AF064866.11	AF064866.1	1.61389	3.20533	84.1716	9.8573e-07	0.000254702	clusterImmature ARC neurons_vs_others	Immature ARC neurons
HCN31	HCN3	1.26245	4.43344	83.8331	1.0068e-06	0.000254702	clusterImmature ARC neurons_vs_others	Immature ARC neurons
NFASC	NFASC	0.920276	6.88396	83.6862	1.01611e-06	0.000254702	clusterImmature ARC neurons_vs_others	Immature ARC neurons
PWRN4	PWRN4	0.892118	7.07549	83.6554	1.01807e-06	0.000254702	clusterImmature ARC neurons_vs_others	Immature ARC neurons
AC093610.1	AC093610.1	3.01062	2.64121	87.6313	1.02545e-06	0.000254702	clusterImmature ARC neurons_vs_others	Immature ARC neurons
AC104827.1	AC104827.1	0.663008	8.3147	83.3324	1.03894e-06	0.000255419	clusterImmature ARC neurons_vs_others	Immature ARC neurons
LMNTD1	LMNTD1	1.98273	4.60459	92.2103	1.05656e-06	0.000257128	clusterImmature ARC neurons_vs_others	Immature ARC neurons
PGAP1	PGAP1	0.747837	7.63367	82.4843	1.09615e-06	0.000262094	clusterImmature ARC neurons_vs_others	Immature ARC neurons
SRRM4	SRRM4	1.89869	7.7836	102.076	1.09872e-06	0.000262094	clusterImmature ARC neurons_vs_others	Immature ARC neurons
EPHB2	EPHB2	0.745167	6.11742	82.0389	1.12767e-06	0.000264028	clusterImmature ARC neurons_vs_others	Immature ARC neurons
DGCR9	DGCR9	1.02455	5.57313	81.9093	1.13704e-06	0.000264028	clusterImmature ARC neurons_vs_others	Immature ARC neurons
RIPOR2	RIPOR2	1.38323	5.09088	82.6908	1.13971e-06	0.000264028	clusterImmature ARC neurons_vs_others	Immature ARC neurons
AL117190.2	AL117190.2	0.775513	10.004	81.2944	1.18275e-06	0.000269528	clusterImmature ARC neurons_vs_others	Immature ARC neurons
PDE10A	PDE10A	0.671951	11.3571	81.2541	1.18582e-06	0.000269528	clusterImmature ARC neurons_vs_others	Immature ARC neurons
PCSK2	PCSK2	2.08665	6.13194	99.7294	1.20334e-06	0.000270954	clusterImmature ARC neurons_vs_others	Immature ARC neurons
SYCP2	SYCP2	1.29732	4.68373	80.2959	1.26164e-06	0.000281452	clusterImmature ARC neurons_vs_others	Immature ARC neurons
DPP10-AS3	DPP10-AS3	3.61239	2.94987	85.1055	1.30775e-06	0.000284638	clusterImmature ARC neurons_vs_others	Immature ARC neurons
AC012358.3	AC012358.3	0.620213	7.41844	79.199	1.35549e-06	0.000288531	clusterImmature ARC neurons_vs_others	Immature ARC neurons
KALRN	KALRN	0.612233	7.75311	79.0903	1.36523e-06	0.000288531	clusterImmature ARC neurons_vs_others	Immature ARC neurons
KCNC21	KCNC2	1.04619	6.56609	78.397	1.4293e-06	0.000296864	clusterImmature ARC neurons_vs_others	Immature ARC neurons
PRDM12	PRDM12	2.36565	2.99909	80.9335	1.49607e-06	0.000308076	clusterImmature ARC neurons_vs_others	Immature ARC neurons
NCAN	NCAN	1.79273	3.87039	79.3764	1.5223e-06	0.000308589	clusterImmature ARC neurons_vs_others	Immature ARC neurons
Z99774.1	Z99774.1	1.53483	5.27063	82.4751	1.52418e-06	0.000308589	clusterImmature ARC neurons_vs_others	Immature ARC neurons
AL391840.1	AL391840.1	0.84114	5.48245	76.5806	1.61454e-06	0.000319658	clusterImmature ARC neurons_vs_others	Immature ARC neurons
AEBP2	AEBP2	0.754505	8.40674	76.0969	1.66851e-06	0.000323632	clusterImmature ARC neurons_vs_others	Immature ARC neurons
PDE3A	PDE3A	1.03391	10.4761	78.8664	1.70585e-06	0.000323632	clusterImmature ARC neurons_vs_others	Immature ARC neurons
LINC00658	LINC00658	1.27588	3.98185	75.7719	1.70594e-06	0.000323632	clusterImmature ARC neurons_vs_others	Immature ARC neurons
NOL4	NOL4	0.954279	7.67535	75.5561	1.73136e-06	0.000325887	clusterImmature ARC neurons_vs_others	Immature ARC neurons
SNAP91	SNAP91	0.824411	8.04121	75.0915	1.78757e-06	0.00033386	clusterImmature ARC neurons_vs_others	Immature ARC neurons
SLC6A1	SLC6A1	1.36163	3.62674	74.691	1.83774e-06	0.000338269	clusterImmature ARC neurons_vs_others	Immature ARC neurons
KIAA1549	KIAA1549	0.643268	6.32047	74.3803	1.8778e-06	0.000341139	clusterImmature ARC neurons_vs_others	Immature ARC neurons
AC021915.1	AC021915.1	2.89846	0.585896	74.2516	1.8947e-06	0.000341139	clusterImmature ARC neurons_vs_others	Immature ARC neurons
NXPH1	NXPH1	2.56282	5.93324	101.12	1.91045e-06	0.000341139	clusterImmature ARC neurons_vs_others	Immature ARC neurons
SGSM1	SGSM1	0.719841	6.66175	74.0892	1.91627e-06	0.000341139	clusterImmature ARC neurons_vs_others	Immature ARC neurons
SORCS3	SORCS3	1.01329	7.10916	73.9397	1.93639e-06	0.000341139	clusterImmature ARC neurons_vs_others	Immature ARC neurons
LINC00632	LINC00632	0.556403	9.19006	73.9143	1.93982e-06	0.000341139	clusterImmature ARC neurons_vs_others	Immature ARC neurons
MEG3	MEG3	0.723547	12.1029	73.6912	1.97036e-06	0.000342206	clusterImmature ARC neurons_vs_others	Immature ARC neurons
LMO7-AS1	LMO7-AS1	0.680157	5.39086	73.4411	2.00526e-06	0.00034333	clusterImmature ARC neurons_vs_others	Immature ARC neurons
CAMK1D	CAMK1D	1.26898	6.81054	78.0308	2.01314e-06	0.00034333	clusterImmature ARC neurons_vs_others	Immature ARC neurons
AC061961.1	AC061961.1	2.08839	3.20491	74.3969	2.02398e-06	0.00034333	clusterImmature ARC neurons_vs_others	Immature ARC neurons
AC012213.1	AC012213.1	1.05704	4.19706	73.2127	2.03778e-06	0.00034333	clusterImmature ARC neurons_vs_others	Immature ARC neurons
AC007535.11	AC007535.1	1.38138	4.15201	72.8121	2.09629e-06	0.00034593	clusterImmature ARC neurons_vs_others	Immature ARC neurons
FGF14	FGF14	0.962045	8.41223	72.2713	2.17843e-06	0.000356931	clusterImmature ARC neurons_vs_others	Immature ARC neurons
SYN2	SYN2	0.888093	6.7337	72.17	2.19422e-06	0.000356931	clusterImmature ARC neurons_vs_others	Immature ARC neurons
DSCAM1	DSCAM	1.11502	9.15826	76.1975	2.20739e-06	0.000356931	clusterImmature ARC neurons_vs_others	Immature ARC neurons
AL121908.1	AL121908.1	1.66025	1.34772	71.8301	2.24823e-06	0.000361111	clusterImmature ARC neurons_vs_others	Immature ARC neurons
FAM106A	FAM106A	1.0062	3.7413	71.7134	2.26713e-06	0.000361735	clusterImmature ARC neurons_vs_others	Immature ARC neurons
PAM	PAM	0.789483	9.45881	71.6116	2.28378e-06	0.000361994	clusterImmature ARC neurons_vs_others	Immature ARC neurons
CD200	CD200	0.646998	6.24427	71.461	2.30865e-06	0.000363054	clusterImmature ARC neurons_vs_others	Immature ARC neurons
LZTS1-AS1	LZTS1-AS1	1.52265	2.92796	71.2996	2.33567e-06	0.000363054	clusterImmature ARC neurons_vs_others	Immature ARC neurons
RALGPS1	RALGPS1	0.575641	7.03832	71.1251	2.36528e-06	0.0003653	clusterImmature ARC neurons_vs_others	Immature ARC neurons
AL049828.1	AL049828.1	0.635055	8.03363	70.6618	2.4461e-06	0.000372952	clusterImmature ARC neurons_vs_others	Immature ARC neurons
AC009102.4	AC009102.4	1.11571	4.27426	70.6455	2.449e-06	0.000372952	clusterImmature ARC neurons_vs_others	Immature ARC neurons
PCDH9	PCDH9	0.919777	10.0264	71.2404	2.46127e-06	0.000372952	clusterImmature ARC neurons_vs_others	Immature ARC neurons
GNA14	GNA14	1.3	3.49524	70.4546	2.48327e-06	0.000373934	clusterImmature ARC neurons_vs_others	Immature ARC neurons
CALHM4	CALHM4	2.63514	-0.733508	70.3146	2.50877e-06	0.000375428	clusterImmature ARC neurons_vs_others	Immature ARC neurons
LINC00609	LINC00609	0.897085	4.49673	70.0055	2.56614e-06	0.000381642	clusterImmature ARC neurons_vs_others	Immature ARC neurons
RNF24	RNF24	0.609884	7.40372	69.8799	2.5899e-06	0.000382813	clusterImmature ARC neurons_vs_others	Immature ARC neurons
PTPRS	PTPRS	0.620685	8.19171	69.5953	2.64469e-06	0.000388527	clusterImmature ARC neurons_vs_others	Immature ARC neurons
AC068481.1	AC068481.1	0.857483	4.46884	68.8731	2.78989e-06	0.000402957	clusterImmature ARC neurons_vs_others	Immature ARC neurons
AL450263.1	AL450263.1	0.955394	3.54563	68.7425	2.81712e-06	0.000402957	clusterImmature ARC neurons_vs_others	Immature ARC neurons
CCDC144A	CCDC144A	0.904654	4.18026	68.7175	2.82237e-06	0.000402957	clusterImmature ARC neurons_vs_others	Immature ARC neurons
INS	INS	2.16674	1.51121	68.6733	2.8317e-06	0.000402957	clusterImmature ARC neurons_vs_others	Immature ARC neurons
AC024901.1	AC024901.1	1.41454	6.40572	76.3307	2.84326e-06	0.000402957	clusterImmature ARC neurons_vs_others	Immature ARC neurons
KCNH4	KCNH4	1.04291	2.80376	68.5032	2.86785e-06	0.000402982	clusterImmature ARC neurons_vs_others	Immature ARC neurons
POT1-AS1	POT1-AS1	0.719066	6.21063	68.4611	2.87689e-06	0.000402982	clusterImmature ARC neurons_vs_others	Immature ARC neurons
AP001407.11	AP001407.1	1.33673	3.82867	68.0227	2.97298e-06	0.000411854	clusterImmature ARC neurons_vs_others	Immature ARC neurons
ROBO2	ROBO2	2.12637	9.70047	91.5352	2.97442e-06	0.000411854	clusterImmature ARC neurons_vs_others	Immature ARC neurons
SHANK2	SHANK2	0.707358	7.91753	67.9299	2.99379e-06	0.000412168	clusterImmature ARC neurons_vs_others	Immature ARC neurons
AC034228.3	AC034228.3	1.35498	4.14594	67.6886	3.04874e-06	0.00041499	clusterImmature ARC neurons_vs_others	Immature ARC neurons
THSD4	THSD4	1.19227	5.27869	67.367	3.12379e-06	0.000422817	clusterImmature ARC neurons_vs_others	Immature ARC neurons
HRH3	HRH3	2.31647	1.33343	66.8825	3.24098e-06	0.000433805	clusterImmature ARC neurons_vs_others	Immature ARC neurons
PTPRZ1	PTPRZ1	1.12203	6.85876	68.5251	3.41566e-06	0.000452162	clusterImmature ARC neurons_vs_others	Immature ARC neurons
AC011899.2	AC011899.2	1.76138	0.918999	65.995	3.46926e-06	0.000456747	clusterImmature ARC neurons_vs_others	Immature ARC neurons
FGD3	FGD3	1.31584	3.8648	65.7465	3.5365e-06	0.000458846	clusterImmature ARC neurons_vs_others	Immature ARC neurons
MGAT4C	MGAT4C	1.59717	6.7001	76.6236	3.54233e-06	0.000458846	clusterImmature ARC neurons_vs_others	Immature ARC neurons
NSG2	NSG2	1.649	6.32542	76.1319	3.5854e-06	0.000461942	clusterImmature ARC neurons_vs_others	Immature ARC neurons
BCL11A	BCL11A	1.18823	5.31618	64.9931	3.7499e-06	0.000480565	clusterImmature ARC neurons_vs_others	Immature ARC neurons
SLITRK4	SLITRK4	1.87612	3.11643	66.1822	3.83219e-06	0.000488513	clusterImmature ARC neurons_vs_others	Immature ARC neurons
SLC6A6	SLC6A6	0.804803	4.31779	64.5181	3.89218e-06	0.000490964	clusterImmature ARC neurons_vs_others	Immature ARC neurons
AC005740.5	AC005740.5	1.06067	3.94168	64.3851	3.93311e-06	0.000491348	clusterImmature ARC neurons_vs_others	Immature ARC neurons
AC026341.2	AC026341.2	1.21934	3.35912	64.3417	3.9466e-06	0.000491348	clusterImmature ARC neurons_vs_others	Immature ARC neurons
CCDC88A	CCDC88A	0.575653	8.0925	64.3102	3.9564e-06	0.000491348	clusterImmature ARC neurons_vs_others	Immature ARC neurons
STK32B	STK32B	0.919279	7.47297	64.1475	4.00755e-06	0.000495149	clusterImmature ARC neurons_vs_others	Immature ARC neurons
KCNB1	KCNB1	0.945567	6.50858	63.8596	4.09999e-06	0.000503985	clusterImmature ARC neurons_vs_others	Immature ARC neurons
DOC2B	DOC2B	0.94044	4.03983	63.6257	4.1769e-06	0.000508252	clusterImmature ARC neurons_vs_others	Immature ARC neurons
CELSR31	CELSR3	1.14386	3.8619	63.4574	4.2333e-06	0.000512527	clusterImmature ARC neurons_vs_others	Immature ARC neurons
LRRC8B	LRRC8B	0.699001	5.92835	63.2792	4.29397e-06	0.000517273	clusterImmature ARC neurons_vs_others	Immature ARC neurons
NLGN1	NLGN1	0.895504	9.54985	63.676	4.3865e-06	0.000523188	clusterImmature ARC neurons_vs_others	Immature ARC neurons
CLASP2	CLASP2	0.587346	9.48716	62.7933	4.46465e-06	0.000527288	clusterImmature ARC neurons_vs_others	Immature ARC neurons
KCNJ5	KCNJ5	1.16503	3.48455	62.71	4.4947e-06	0.000528248	clusterImmature ARC neurons_vs_others	Immature ARC neurons
NPM2	NPM2	1.83523	4.81151	69.8106	4.53013e-06	0.000529827	clusterImmature ARC neurons_vs_others	Immature ARC neurons
BX322234.1	BX322234.1	1.49366	2.50953	62.2805	4.65347e-06	0.000537809	clusterImmature ARC neurons_vs_others	Immature ARC neurons
STXBP1	STXBP1	0.792855	6.8369	62.1924	4.68686e-06	0.000537809	clusterImmature ARC neurons_vs_others	Immature ARC neurons
TCF4-AS1	TCF4-AS1	0.95901	4.62118	62.1022	4.72131e-06	0.000539102	clusterImmature ARC neurons_vs_others	Immature ARC neurons
SRGAP3	SRGAP3	0.561625	8.20116	61.9281	4.78865e-06	0.000544213	clusterImmature ARC neurons_vs_others	Immature ARC neurons
AC019155.2	AC019155.2	1.27865	1.78293	61.5401	4.94281e-06	0.000559094	clusterImmature ARC neurons_vs_others	Immature ARC neurons
STXBP5-AS1	STXBP5-AS1	1.42203	8.65546	71.7816	5.00893e-06	0.000560144	clusterImmature ARC neurons_vs_others	Immature ARC neurons
AC010327.4	AC010327.4	1.57578	4.08077	62.2015	5.01153e-06	0.000560144	clusterImmature ARC neurons_vs_others	Immature ARC neurons
ATP2B2	ATP2B2	0.979877	5.18296	61.3363	5.02613e-06	0.000560144	clusterImmature ARC neurons_vs_others	Immature ARC neurons
DLX2	DLX2	1.8378	0.467567	61.2904	5.04509e-06	0.000560144	clusterImmature ARC neurons_vs_others	Immature ARC neurons
AC005481.1	AC005481.1	1.16399	3.13206	60.8097	5.24906e-06	0.000572323	clusterImmature ARC neurons_vs_others	Immature ARC neurons
SNHG14	SNHG14	0.465443	12.0823	60.7632	5.26928e-06	0.000572323	clusterImmature ARC neurons_vs_others	Immature ARC neurons
PDE2A	PDE2A	1.62794	2.62473	60.7128	5.29134e-06	0.000572323	clusterImmature ARC neurons_vs_others	Immature ARC neurons
RAX	RAX	1.71167	4.47855	63.2903	5.29731e-06	0.000572323	clusterImmature ARC neurons_vs_others	Immature ARC neurons
DCLK1	DCLK1	0.81444	9.17966	60.6238	5.3305e-06	0.000573338	clusterImmature ARC neurons_vs_others	Immature ARC neurons
GPHN	GPHN	0.561135	10.0002	60.2062	5.51892e-06	0.000590966	clusterImmature ARC neurons_vs_others	Immature ARC neurons
SCN2A	SCN2A	1.40833	7.05396	67.9791	5.58643e-06	0.000593856	clusterImmature ARC neurons_vs_others	Immature ARC neurons
CAP2	CAP2	0.769269	6.0864	60.0419	5.59521e-06	0.000593856	clusterImmature ARC neurons_vs_others	Immature ARC neurons
GLYCTK-AS1	GLYCTK-AS1	1.17024	2.82576	59.9431	5.64165e-06	0.000596159	clusterImmature ARC neurons_vs_others	Immature ARC neurons
XKR7	XKR7	1.4431	3.55154	59.4089	5.90076e-06	0.000618118	clusterImmature ARC neurons_vs_others	Immature ARC neurons
PHACTR3	PHACTR3	1.78306	5.90923	69.272	6.02754e-06	0.000628665	clusterImmature ARC neurons_vs_others	Immature ARC neurons
PCDH9-AS3	PCDH9-AS3	1.22764	3.47444	58.7936	6.2166e-06	0.000645589	clusterImmature ARC neurons_vs_others	Immature ARC neurons
CPEB1-AS1	CPEB1-AS1	0.759129	5.41582	58.6733	6.28067e-06	0.000649443	clusterImmature ARC neurons_vs_others	Immature ARC neurons
SH3GL31	SH3GL3	1.04088	5.88379	58.1856	6.54833e-06	0.000667904	clusterImmature ARC neurons_vs_others	Immature ARC neurons
DPYSL5	DPYSL5	0.916424	6.41965	58.1234	6.58341e-06	0.000667904	clusterImmature ARC neurons_vs_others	Immature ARC neurons
AL356489.2	AL356489.2	1.30892	1.02816	58.0692	6.61415e-06	0.000667904	clusterImmature ARC neurons_vs_others	Immature ARC neurons
GLCCI1	GLCCI1	0.734718	7.72701	58.063	6.61769e-06	0.000667904	clusterImmature ARC neurons_vs_others	Immature ARC neurons
SLC4A5	SLC4A5	0.587296	5.64126	58.0492	6.62554e-06	0.000667904	clusterImmature ARC neurons_vs_others	Immature ARC neurons
BX005019.1	BX005019.1	1.57476	3.08747	57.6663	6.84811e-06	0.000681248	clusterImmature ARC neurons_vs_others	Immature ARC neurons
AL391097.1	AL391097.1	1.24741	1.96796	57.6277	6.87101e-06	0.000681248	clusterImmature ARC neurons_vs_others	Immature ARC neurons
SPRY4-AS1	SPRY4-AS1	0.551404	7.4846	57.3882	7.01522e-06	0.000692695	clusterImmature ARC neurons_vs_others	Immature ARC neurons
GLIPR1L1	GLIPR1L1	0.814588	6.56926	57.2869	7.07728e-06	0.000695971	clusterImmature ARC neurons_vs_others	Immature ARC neurons
BSN	BSN	0.63123	5.39726	57.1017	7.19243e-06	0.00070324	clusterImmature ARC neurons_vs_others	Immature ARC neurons
AF279873.3	AF279873.3	1.10597	4.48421	56.9331	7.29911e-06	0.000709102	clusterImmature ARC neurons_vs_others	Immature ARC neurons
AMER3	AMER3	1.55414	2.80765	56.7486	7.41801e-06	0.00071497	clusterImmature ARC neurons_vs_others	Immature ARC neurons
NCOA3	NCOA3	0.572211	6.85695	56.7471	7.41897e-06	0.00071497	clusterImmature ARC neurons_vs_others	Immature ARC neurons
NOTCH2	NOTCH2	4.57766	6.08216	2135.73	9.28881e-15	2.23795e-10	clusterTanycytes_vs_others	Tanycytes
GPC3	GPC3	4.84515	7.80675	1765.64	2.85269e-14	2.86757e-10	clusterTanycytes_vs_others	Tanycytes
AC002460.2	AC002460.2	3.7285	6.92535	1699.64	3.57063e-14	2.86757e-10	clusterTanycytes_vs_others	Tanycytes
COL8A1	COL8A1	5.86265	6.37542	1603.93	7.57685e-14	3.64105e-10	clusterTanycytes_vs_others	Tanycytes
MAMDC2-AS1	MAMDC2-AS1	2.85071	6.76279	1466.97	8.49681e-14	3.64105e-10	clusterTanycytes_vs_others	Tanycytes
ADAMTS9	ADAMTS9	4.41951	6.3692	1450.85	9.0675e-14	3.64105e-10	clusterTanycytes_vs_others	Tanycytes
NFIA	NFIA	4.65508	6.86826	1407.84	1.08244e-13	3.72559e-10	clusterTanycytes_vs_others	Tanycytes
FAT1	FAT1	3.03599	7.13759	1326.73	1.53463e-13	4.28814e-10	clusterTanycytes_vs_others	Tanycytes
HMGA2	HMGA2	5.21952	6.55131	1382.07	1.60184e-13	4.28814e-10	clusterTanycytes_vs_others	Tanycytes
SDC2	SDC2	3.7222	6.98197	1240.22	2.2812e-13	5.4961e-10	clusterTanycytes_vs_others	Tanycytes
ALPK1	ALPK1	4.00563	3.42536	1183.27	3.00695e-13	6.58604e-10	clusterTanycytes_vs_others	Tanycytes
ADAMTS9-AS1	ADAMTS9-AS1	4.90273	4.47991	1139.46	3.7531e-13	7.53529e-10	clusterTanycytes_vs_others	Tanycytes
TGFB2	TGFB2	4.59253	5.41287	1123.84	4.06991e-13	7.54279e-10	clusterTanycytes_vs_others	Tanycytes
MSI2	MSI2	1.92004	8.9816	1037.28	6.51506e-13	1.1212e-09	clusterTanycytes_vs_others	Tanycytes
NOTCH2NLC	NOTCH2NLC	3.63221	5.31502	1024.75	6.99662e-13	1.12126e-09	clusterTanycytes_vs_others	Tanycytes
LTBP1	LTBP1	3.4289	6.66104	996.656	8.23572e-13	1.1672e-09	clusterTanycytes_vs_others	Tanycytes
GLIS3	GLIS3	4.91898	8.0115	1213.18	8.95873e-13	1.19913e-09	clusterTanycytes_vs_others	Tanycytes
DIO2	DIO2	3.37738	4.04344	960.354	1.02375e-12	1.29817e-09	clusterTanycytes_vs_others	Tanycytes
PARD3B	PARD3B	3.03002	7.72976	895.012	1.54715e-12	1.77502e-09	clusterTanycytes_vs_others	Tanycytes
EGF	EGF	3.47814	3.37283	876.807	1.74505e-12	1.82797e-09	clusterTanycytes_vs_others	Tanycytes
LCNL1	LCNL1	5.01976	4.67836	864.482	1.89586e-12	1.89475e-09	clusterTanycytes_vs_others	Tanycytes
SLC7A2	SLC7A2	4.5565	4.76347	859.13	1.96608e-12	1.89475e-09	clusterTanycytes_vs_others	Tanycytes
RBMS1	RBMS1	2.74503	8.21981	824.85	2.49523e-12	2.22658e-09	clusterTanycytes_vs_others	Tanycytes
ADAMTS12	ADAMTS12	3.05866	4.5014	794.456	3.10814e-12	2.60997e-09	clusterTanycytes_vs_others	Tanycytes
PLEKHG1	PLEKHG1	2.55748	6.66815	793.006	3.14154e-12	2.60997e-09	clusterTanycytes_vs_others	Tanycytes
PDE3A1	PDE3A	3.23839	10.4761	844.408	3.82713e-12	2.85556e-09	clusterTanycytes_vs_others	Tanycytes
TANC1	TANC1	3.81132	6.10943	783.273	3.87198e-12	2.85556e-09	clusterTanycytes_vs_others	Tanycytes
SDK1	SDK1	2.77505	9.23369	751.898	4.28844e-12	2.90054e-09	clusterTanycytes_vs_others	Tanycytes
PDGFC	PDGFC	3.15153	5.95296	749.505	4.36908e-12	2.90054e-09	clusterTanycytes_vs_others	Tanycytes
STK32B1	STK32B	2.97463	7.47297	747.029	4.4544e-12	2.90054e-09	clusterTanycytes_vs_others	Tanycytes
DAAM2	DAAM2	3.81585	3.91614	731.123	5.05131e-12	3.04253e-09	clusterTanycytes_vs_others	Tanycytes
LIMCH1	LIMCH1	2.27205	8.17089	722.26	5.42429e-12	3.16319e-09	clusterTanycytes_vs_others	Tanycytes
QKI	QKI	2.51846	8.49555	720.23	5.51422e-12	3.16319e-09	clusterTanycytes_vs_others	Tanycytes
ITGAV	ITGAV	2.02809	6.02733	715.935	5.71025e-12	3.19687e-09	clusterTanycytes_vs_others	Tanycytes
YAP1	YAP1	4.87818	5.54512	826.43	5.83831e-12	3.19687e-09	clusterTanycytes_vs_others	Tanycytes
TENM3	TENM3	3.31086	8.95586	764.896	6.72454e-12	3.45917e-09	clusterTanycytes_vs_others	Tanycytes
REST	REST	3.08257	4.95691	693.945	6.85115e-12	3.45917e-09	clusterTanycytes_vs_others	Tanycytes
ITGB5	ITGB5	2.90467	3.46932	687.984	7.20494e-12	3.45917e-09	clusterTanycytes_vs_others	Tanycytes
SLC35G1	SLC35G1	2.91093	4.82331	686.003	7.32721e-12	3.45917e-09	clusterTanycytes_vs_others	Tanycytes
AC253572.1	AC253572.1	4.30308	2.18579	683.802	7.46593e-12	3.45917e-09	clusterTanycytes_vs_others	Tanycytes
BARD1	BARD1	3.48317	2.71167	679.213	7.76519e-12	3.46457e-09	clusterTanycytes_vs_others	Tanycytes
FBXL7	FBXL7	2.40818	7.90019	664.84	8.79726e-12	3.85368e-09	clusterTanycytes_vs_others	Tanycytes
IFI44L	IFI44L	7.62034	2.21553	662.237	9.0009e-12	3.87248e-09	clusterTanycytes_vs_others	Tanycytes
FAM160A1	FAM160A1	3.56729	5.26082	659.999	9.18035e-12	3.88039e-09	clusterTanycytes_vs_others	Tanycytes
LRIG3	LRIG3	5.3276	3.72865	654.563	9.63405e-12	3.93412e-09	clusterTanycytes_vs_others	Tanycytes
MRC2	MRC2	3.21786	6.04237	650.95	9.95004e-12	3.97772e-09	clusterTanycytes_vs_others	Tanycytes
AP001172.1	AP001172.1	3.9744	5.21486	662.443	1.02329e-11	3.97772e-09	clusterTanycytes_vs_others	Tanycytes
ITPR1	ITPR1	2.80946	4.75454	645.805	1.04213e-11	3.9854e-09	clusterTanycytes_vs_others	Tanycytes
TET1	TET1	1.9056	6.65714	638.446	1.11413e-11	4.09094e-09	clusterTanycytes_vs_others	Tanycytes
AC069272.1	AC069272.1	2.78806	5.01574	637.806	1.12067e-11	4.09094e-09	clusterTanycytes_vs_others	Tanycytes
PHLDB2	PHLDB2	3.71619	4.599	631.736	1.1849e-11	4.23206e-09	clusterTanycytes_vs_others	Tanycytes
FGFR2	FGFR2	4.32258	4.56955	642.381	1.19445e-11	4.23206e-09	clusterTanycytes_vs_others	Tanycytes
TOP2A	TOP2A	3.69783	2.92714	625.628	1.25393e-11	4.31586e-09	clusterTanycytes_vs_others	Tanycytes
MEGF10	MEGF10	4.46731	4.35119	624.599	1.28232e-11	4.34882e-09	clusterTanycytes_vs_others	Tanycytes
COL25A1	COL25A1	2.61911	8.07253	621.547	1.30268e-11	4.34882e-09	clusterTanycytes_vs_others	Tanycytes
BDH2	BDH2	3.20792	4.10627	618.979	1.33448e-11	4.34882e-09	clusterTanycytes_vs_others	Tanycytes
PARP14	PARP14	3.97062	3.18286	618.882	1.33571e-11	4.34882e-09	clusterTanycytes_vs_others	Tanycytes
MITF	MITF	4.86825	5.13917	709.839	1.3688e-11	4.39713e-09	clusterTanycytes_vs_others	Tanycytes
IGFBP7	IGFBP7	4.41604	4.74786	638.683	1.38997e-11	4.40639e-09	clusterTanycytes_vs_others	Tanycytes
OCA2	OCA2	2.39631	5.952	610.166	1.45076e-11	4.52919e-09	clusterTanycytes_vs_others	Tanycytes
PROCR	PROCR	2.65086	5.43021	609.05	1.46631e-11	4.52919e-09	clusterTanycytes_vs_others	Tanycytes
CYBRD1	CYBRD1	5.8677	4.87186	741.288	1.52502e-11	4.65092e-09	clusterTanycytes_vs_others	Tanycytes
AC012354.1	AC012354.1	3.15821	3.48942	601.919	1.57042e-11	4.7295e-09	clusterTanycytes_vs_others	Tanycytes
FGF7	FGF7	3.02727	4.09379	593.099	1.71138e-11	5.02833e-09	clusterTanycytes_vs_others	Tanycytes
NUDT4	NUDT4	2.33541	5.60083	590.431	1.75689e-11	5.04161e-09	clusterTanycytes_vs_others	Tanycytes
EPHA4	EPHA4	3.61847	5.38827	610.496	1.75775e-11	5.04161e-09	clusterTanycytes_vs_others	Tanycytes
LRP4-AS1	LRP4-AS1	4.01545	4.38385	588.005	1.7995e-11	5.09684e-09	clusterTanycytes_vs_others	Tanycytes
PRDM16	PRDM16	3.56055	5.03424	586.9	1.81932e-11	5.09684e-09	clusterTanycytes_vs_others	Tanycytes
UACA	UACA	3.09611	3.70951	576.683	2.0151e-11	5.46924e-09	clusterTanycytes_vs_others	Tanycytes
NR3C2	NR3C2	3.13721	7.76207	628.346	2.02035e-11	5.46924e-09	clusterTanycytes_vs_others	Tanycytes
FSTL1	FSTL1	3.09537	4.54605	574.962	2.05044e-11	5.48904e-09	clusterTanycytes_vs_others	Tanycytes
KIF18B	KIF18B	4.43343	1.79846	564.995	2.27002e-11	5.94644e-09	clusterTanycytes_vs_others	Tanycytes
LATS2	LATS2	2.80055	4.69519	564.968	2.27067e-11	5.94644e-09	clusterTanycytes_vs_others	Tanycytes
WWTR1	WWTR1	2.73555	5.80842	563.815	2.29781e-11	5.94991e-09	clusterTanycytes_vs_others	Tanycytes
TNFRSF19	TNFRSF19	3.9469	5.56358	614.858	2.32139e-11	5.94991e-09	clusterTanycytes_vs_others	Tanycytes
MEIS2	MEIS2	3.18653	6.72754	595.107	2.68889e-11	6.66164e-09	clusterTanycytes_vs_others	Tanycytes
TCF7L2	TCF7L2	2.09118	6.94617	545.053	2.79753e-11	6.80818e-09	clusterTanycytes_vs_others	Tanycytes
AL139807.1	AL139807.1	2.75722	6.27658	537.637	3.02936e-11	7.29864e-09	clusterTanycytes_vs_others	Tanycytes
OTX2-AS1	OTX2-AS1	3.09862	6.0309	551.857	3.09462e-11	7.32307e-09	clusterTanycytes_vs_others	Tanycytes
HMGA2-AS1	HMGA2-AS1	4.85972	6.04956	695.071	3.10029e-11	7.32307e-09	clusterTanycytes_vs_others	Tanycytes
AC034206.1	AC034206.1	4.90307	2.27269	529.717	3.30217e-11	7.7242e-09	clusterTanycytes_vs_others	Tanycytes
LMO4	LMO4	1.88024	5.85014	525.592	3.4556e-11	7.92913e-09	clusterTanycytes_vs_others	Tanycytes
PLA2R1	PLA2R1	2.26868	4.514	520.591	3.65291e-11	8.19921e-09	clusterTanycytes_vs_others	Tanycytes
MYOF	MYOF	4.06197	4.81204	549.745	3.6754e-11	8.19921e-09	clusterTanycytes_vs_others	Tanycytes
VRK2	VRK2	2.16396	5.17715	516.5	3.82412e-11	8.45271e-09	clusterTanycytes_vs_others	Tanycytes
INTU	INTU	1.62224	7.06584	511.756	4.03459e-11	8.74231e-09	clusterTanycytes_vs_others	Tanycytes
PDK4	PDK4	4.85941	2.15791	511.289	4.05601e-11	8.74231e-09	clusterTanycytes_vs_others	Tanycytes
PTPN14	PTPN14	3.46577	4.51745	511.116	4.064e-11	8.74231e-09	clusterTanycytes_vs_others	Tanycytes
ARHGAP42	ARHGAP42	3.51386	5.46451	543.532	4.12322e-11	8.75553e-09	clusterTanycytes_vs_others	Tanycytes
MYO1E	MYO1E	2.45146	5.02161	509.427	4.14282e-11	8.75553e-09	clusterTanycytes_vs_others	Tanycytes
CYP1B1	CYP1B1	3.45267	2.77879	507.715	4.22457e-11	8.85066e-09	clusterTanycytes_vs_others	Tanycytes
MAMDC2	MAMDC2	1.93793	7.47125	505.807	4.31794e-11	8.90935e-09	clusterTanycytes_vs_others	Tanycytes
CASP7	CASP7	4.25661	1.86372	504.469	4.3848e-11	8.9528e-09	clusterTanycytes_vs_others	Tanycytes
AC135895.1	AC135895.1	5.7742	1.65447	502.404	4.49044e-11	9.04574e-09	clusterTanycytes_vs_others	Tanycytes
DLK1	DLK1	2.74394	8.31466	530.134	4.50541e-11	9.04574e-09	clusterTanycytes_vs_others	Tanycytes
NHSL1	NHSL1	3.41863	6.37632	559.399	4.96556e-11	9.8872e-09	clusterTanycytes_vs_others	Tanycytes
CNTN6	CNTN6	2.36707	6.43318	487.613	5.3404e-11	1.05464e-08	clusterTanycytes_vs_others	Tanycytes
AMOTL1	AMOTL1	1.62479	6.3968	485.701	5.46345e-11	1.05997e-08	clusterTanycytes_vs_others	Tanycytes
EML4	EML4	1.5971	7.50926	485.664	5.46591e-11	1.05997e-08	clusterTanycytes_vs_others	Tanycytes
RASGEF1B	RASGEF1B	1.8968	8.99411	485.153	5.49935e-11	1.05997e-08	clusterTanycytes_vs_others	Tanycytes
BOC	BOC	5.45976	3.97396	542.691	5.7422e-11	1.09525e-08	clusterTanycytes_vs_others	Tanycytes
PALLD	PALLD	1.44842	7.81895	481.102	5.77331e-11	1.09525e-08	clusterTanycytes_vs_others	Tanycytes
AC112487.11	AC112487.1	1.69104	7.00551	478.483	5.95892e-11	1.12163e-08	clusterTanycytes_vs_others	Tanycytes
SOX9-AS1	SOX9-AS1	3.01091	4.53565	476.311	6.11815e-11	1.14267e-08	clusterTanycytes_vs_others	Tanycytes
AFF1	AFF1	1.62881	6.34202	474.28	6.27158e-11	1.15344e-08	clusterTanycytes_vs_others	Tanycytes
FAM13A	FAM13A	2.08433	7.60875	473.606	6.32349e-11	1.15418e-08	clusterTanycytes_vs_others	Tanycytes
ACSF2	ACSF2	3.18299	2.65989	468.869	6.70274e-11	1.2142e-08	clusterTanycytes_vs_others	Tanycytes
MYO10	MYO10	1.76015	6.14562	460.64	7.4268e-11	1.31755e-08	clusterTanycytes_vs_others	Tanycytes
ZFP36L1	ZFP36L1	5.35444	4.3165	530.186	7.4373e-11	1.31755e-08	clusterTanycytes_vs_others	Tanycytes
AC078955.1	AC078955.1	4.7098	1.74703	457.492	7.72765e-11	1.35899e-08	clusterTanycytes_vs_others	Tanycytes
CLEC2D	CLEC2D	3.14971	2.70826	453.647	8.11464e-11	1.37047e-08	clusterTanycytes_vs_others	Tanycytes
PON2	PON2	2.68493	6.16276	453.599	8.11969e-11	1.37047e-08	clusterTanycytes_vs_others	Tanycytes
CD99	CD99	2.71132	5.10411	453.349	8.14565e-11	1.37047e-08	clusterTanycytes_vs_others	Tanycytes
NFIB	NFIB	4.07711	6.91988	591.396	8.24798e-11	1.37047e-08	clusterTanycytes_vs_others	Tanycytes
MAPK4	MAPK4	2.42772	6.56457	450.77	8.4191e-11	1.38045e-08	clusterTanycytes_vs_others	Tanycytes
ZNF521	ZNF521	2.57842	7.48796	464.845	8.4226e-11	1.38045e-08	clusterTanycytes_vs_others	Tanycytes
TIPARP	TIPARP	2.53791	4.34007	449.847	8.51966e-11	1.38223e-08	clusterTanycytes_vs_others	Tanycytes
LAMC1	LAMC1	2.48643	6.28901	449.586	8.54824e-11	1.38223e-08	clusterTanycytes_vs_others	Tanycytes
PARP4	PARP4	2.45478	4.71618	448.443	8.67519e-11	1.39136e-08	clusterTanycytes_vs_others	Tanycytes
AC109129.1	AC109129.1	2.59297	5.92594	448.008	8.72406e-11	1.39136e-08	clusterTanycytes_vs_others	Tanycytes
ANGPT1	ANGPT1	2.87225	3.77448	446.221	8.92822e-11	1.40593e-08	clusterTanycytes_vs_others	Tanycytes
MAP3K20	MAP3K20	2.5242	4.12705	445.357	9.0289e-11	1.41255e-08	clusterTanycytes_vs_others	Tanycytes
NFATC4	NFATC4	3.01653	2.42972	443.597	9.23816e-11	1.41768e-08	clusterTanycytes_vs_others	Tanycytes
AC093535.1	AC093535.1	2.50399	4.3189	441.175	9.53555e-11	1.45405e-08	clusterTanycytes_vs_others	Tanycytes
BMPR1A	BMPR1A	1.40278	8.12081	436.613	1.01266e-10	1.5154e-08	clusterTanycytes_vs_others	Tanycytes
ZFP36L2	ZFP36L2	3.36619	3.54336	435.146	1.03255e-10	1.53563e-08	clusterTanycytes_vs_others	Tanycytes
NEK6	NEK6	2.30427	4.46412	432.211	1.07377e-10	1.58713e-08	clusterTanycytes_vs_others	Tanycytes
GAREM1	GAREM1	2.16776	7.27399	430.908	1.09268e-10	1.59551e-08	clusterTanycytes_vs_others	Tanycytes
ROR2	ROR2	2.3086	4.89893	428.962	1.12166e-10	1.62057e-08	clusterTanycytes_vs_others	Tanycytes
AC019127.1	AC019127.1	3.9971	3.17446	428.798	1.12414e-10	1.62057e-08	clusterTanycytes_vs_others	Tanycytes
KIF13A	KIF13A	1.63231	6.53897	428.182	1.13353e-10	1.62057e-08	clusterTanycytes_vs_others	Tanycytes
LRRC8D	LRRC8D	1.8001	8.12457	427.535	1.14347e-10	1.62057e-08	clusterTanycytes_vs_others	Tanycytes
GAB1	GAB1	1.96607	5.97475	422.124	1.23083e-10	1.72726e-08	clusterTanycytes_vs_others	Tanycytes
VIPR2	VIPR2	3.45579	3.2328	421.382	1.24343e-10	1.73167e-08	clusterTanycytes_vs_others	Tanycytes
RBMX	RBMX	1.44421	7.08773	420.75	1.25425e-10	1.73671e-08	clusterTanycytes_vs_others	Tanycytes
NOTCH2NLA	NOTCH2NLA	3.76323	2.60134	419.439	1.27707e-10	1.74821e-08	clusterTanycytes_vs_others	Tanycytes
IL15	IL15	4.86706	4.76203	511.624	1.37897e-10	1.85658e-08	clusterTanycytes_vs_others	Tanycytes
LRP6	LRP6	1.34026	7.51375	413.883	1.37935e-10	1.85658e-08	clusterTanycytes_vs_others	Tanycytes
TGIF2	TGIF2	4.09218	2.56195	407.513	1.50861e-10	2.01928e-08	clusterTanycytes_vs_others	Tanycytes
HLA-E	HLA-E	4.11487	1.99047	406.14	1.5383e-10	2.04764e-08	clusterTanycytes_vs_others	Tanycytes
KANK1	KANK1	1.75568	5.23996	405.65	1.54906e-10	2.05001e-08	clusterTanycytes_vs_others	Tanycytes
MSRB3	MSRB3	3.68769	3.5408	405.287	1.5571e-10	2.05001e-08	clusterTanycytes_vs_others	Tanycytes
SLC25A21	SLC25A21	2.41214	4.95245	404.55	1.57353e-10	2.06039e-08	clusterTanycytes_vs_others	Tanycytes
BMP7	BMP7	2.40175	3.4046	400.385	1.67039e-10	2.15941e-08	clusterTanycytes_vs_others	Tanycytes
SUCLG2	SUCLG2	2.39901	4.94347	399.227	1.69856e-10	2.16476e-08	clusterTanycytes_vs_others	Tanycytes
NCKAP5	NCKAP5	1.99252	8.75871	398.878	1.70715e-10	2.16476e-08	clusterTanycytes_vs_others	Tanycytes
CDH2	CDH2	1.39848	8.43483	394.195	1.82753e-10	2.30527e-08	clusterTanycytes_vs_others	Tanycytes
TLL1	TLL1	3.76982	3.72404	390.136	1.93997e-10	2.41982e-08	clusterTanycytes_vs_others	Tanycytes
EIF3E	EIF3E	1.47676	6.15182	389.402	1.96116e-10	2.41982e-08	clusterTanycytes_vs_others	Tanycytes
IFI44	IFI44	7.44031	1.33584	682.875	1.96185e-10	2.41982e-08	clusterTanycytes_vs_others	Tanycytes
EPHA3	EPHA3	2.68959	8.24724	437.109	1.97869e-10	2.41982e-08	clusterTanycytes_vs_others	Tanycytes
LINC02097	LINC02097	4.82596	2.96097	389.37	1.98366e-10	2.41982e-08	clusterTanycytes_vs_others	Tanycytes
GPX8	GPX8	5.57868	2.79581	399.471	2.00479e-10	2.42721e-08	clusterTanycytes_vs_others	Tanycytes
CELSR1	CELSR1	2.04977	5.15749	386.661	2.04269e-10	2.46073e-08	clusterTanycytes_vs_others	Tanycytes
TARID	TARID	2.71819	4.88171	384.339	2.11486e-10	2.51002e-08	clusterTanycytes_vs_others	Tanycytes
PDLIM3	PDLIM3	2.89069	4.48031	383.915	2.12837e-10	2.51367e-08	clusterTanycytes_vs_others	Tanycytes
SLC15A1	SLC15A1	4.60726	3.52375	402.632	2.14843e-10	2.52498e-08	clusterTanycytes_vs_others	Tanycytes
COL4A6	COL4A6	2.66544	5.40226	382.345	2.17924e-10	2.53745e-08	clusterTanycytes_vs_others	Tanycytes
DSG2	DSG2	3.1436	2.84028	382.319	2.1801e-10	2.53745e-08	clusterTanycytes_vs_others	Tanycytes
NOTCH1	NOTCH1	3.52539	3.36669	379.529	2.27411e-10	2.62154e-08	clusterTanycytes_vs_others	Tanycytes
SLC7A11	SLC7A11	2.52921	6.13164	378.579	2.3072e-10	2.6428e-08	clusterTanycytes_vs_others	Tanycytes
AC017101.1	AC017101.1	1.79273	6.06035	378.371	2.3145e-10	2.6428e-08	clusterTanycytes_vs_others	Tanycytes
DOCK1	DOCK1	2.02964	5.78125	377.082	2.36046e-10	2.68257e-08	clusterTanycytes_vs_others	Tanycytes
ATP11A	ATP11A	1.71485	7.28379	374.707	2.44797e-10	2.76896e-08	clusterTanycytes_vs_others	Tanycytes
KANK4	KANK4	3.51169	4.47611	379.204	2.53151e-10	2.85008e-08	clusterTanycytes_vs_others	Tanycytes
STK39	STK39	1.61257	7.80126	371.914	2.55581e-10	2.86406e-08	clusterTanycytes_vs_others	Tanycytes
AC090673.1	AC090673.1	5.40565	4.33325	463.975	2.70933e-10	2.9914e-08	clusterTanycytes_vs_others	Tanycytes
MAP3K20-AS1	MAP3K20-AS1	3.56104	3.13589	367.594	2.73368e-10	2.9914e-08	clusterTanycytes_vs_others	Tanycytes
DECR1	DECR1	2.02368	5.24171	367.417	2.74127e-10	2.9914e-08	clusterTanycytes_vs_others	Tanycytes
CA12	CA12	3.51813	4.0796	373.623	2.74395e-10	2.9914e-08	clusterTanycytes_vs_others	Tanycytes
MAP2K6	MAP2K6	2.05156	5.97042	365.976	2.80397e-10	3.03264e-08	clusterTanycytes_vs_others	Tanycytes
BNC2	BNC2	4.432	4.96648	460.638	2.81585e-10	3.03264e-08	clusterTanycytes_vs_others	Tanycytes
MIR100HG	MIR100HG	1.7964	8.31955	365.625	2.81954e-10	3.03264e-08	clusterTanycytes_vs_others	Tanycytes
NPAS2	NPAS2	1.90077	5.95445	364.701	2.8609e-10	3.06345e-08	clusterTanycytes_vs_others	Tanycytes
ECHDC2	ECHDC2	1.7261	5.26689	363.996	2.89293e-10	3.07095e-08	clusterTanycytes_vs_others	Tanycytes
AL445259.1	AL445259.1	9.0251	1.76008	630.437	2.89339e-10	3.07095e-08	clusterTanycytes_vs_others	Tanycytes
TCF4-AS11	TCF4-AS1	2.17793	4.62118	363.551	2.91337e-10	3.0769e-08	clusterTanycytes_vs_others	Tanycytes
PHLPP1	PHLPP1	1.93452	8.5114	362.674	2.95417e-10	3.08116e-08	clusterTanycytes_vs_others	Tanycytes
TPM2	TPM2	2.46487	3.75179	360.006	3.08239e-10	3.17807e-08	clusterTanycytes_vs_others	Tanycytes
PLCH1-AS1	PLCH1-AS1	4.09344	2.52411	359.92	3.08665e-10	3.17807e-08	clusterTanycytes_vs_others	Tanycytes
F3	F3	4.37352	3.18817	361.245	3.15515e-10	3.22106e-08	clusterTanycytes_vs_others	Tanycytes
DCT	DCT	3.99389	4.43702	401.017	3.24022e-10	3.28011e-08	clusterTanycytes_vs_others	Tanycytes
CYYR1	CYYR1	2.49277	3.8119	354.761	3.35394e-10	3.36694e-08	clusterTanycytes_vs_others	Tanycytes
MDFIC	MDFIC	3.78078	4.03546	371.034	3.39452e-10	3.39353e-08	clusterTanycytes_vs_others	Tanycytes
TRPS1	TRPS1	1.85151	7.26892	350.311	3.60647e-10	3.57575e-08	clusterTanycytes_vs_others	Tanycytes
SLC27A6	SLC27A6	3.48422	3.17144	348.633	3.70742e-10	3.64583e-08	clusterTanycytes_vs_others	Tanycytes
PER3	PER3	1.5445	5.28447	345.895	3.87933e-10	3.77377e-08	clusterTanycytes_vs_others	Tanycytes
AC105114.2	AC105114.2	2.50574	4.68407	344.723	3.95575e-10	3.80936e-08	clusterTanycytes_vs_others	Tanycytes
PRELID2	PRELID2	1.99571	6.14482	342.775	4.08668e-10	3.90716e-08	clusterTanycytes_vs_others	Tanycytes
SLC22A3	SLC22A3	3.66718	2.5407	342.385	4.11348e-10	3.91724e-08	clusterTanycytes_vs_others	Tanycytes
PREX2	PREX2	2.96735	2.81349	340.475	4.24784e-10	4.01346e-08	clusterTanycytes_vs_others	Tanycytes
TMTC2	TMTC2	1.93727	8.11493	339.366	4.3282e-10	4.07341e-08	clusterTanycytes_vs_others	Tanycytes
AC021088.1	AC021088.1	2.52777	3.97163	338.098	4.42224e-10	4.1096e-08	clusterTanycytes_vs_others	Tanycytes
P2RY1	P2RY1	4.2527	1.41257	337.93	4.43488e-10	4.1096e-08	clusterTanycytes_vs_others	Tanycytes
CENPF	CENPF	3.76953	3.09912	337.475	4.46937e-10	4.12569e-08	clusterTanycytes_vs_others	Tanycytes
AC008957.2	AC008957.2	5.81059	2.91847	366.218	4.54489e-10	4.17939e-08	clusterTanycytes_vs_others	Tanycytes
NEDD9	NEDD9	2.05501	5.86038	336.174	4.56962e-10	4.18615e-08	clusterTanycytes_vs_others	Tanycytes
BCL2L14	BCL2L14	1.38247	8.17534	335.5	4.62256e-10	4.20269e-08	clusterTanycytes_vs_others	Tanycytes
SMAD3	SMAD3	2.53552	5.13552	332.545	4.86343e-10	4.35593e-08	clusterTanycytes_vs_others	Tanycytes
LRIG1	LRIG1	2.62683	5.47849	338.08	4.90621e-10	4.37797e-08	clusterTanycytes_vs_others	Tanycytes
NTM	NTM	3.34602	7.29384	1129.62	3.9492e-13	5.23737e-09	clusterTelencephalic neurons_vs_others	Telencephalic neurons
AL133166.1	AL133166.1	6.05181	3.94261	1063.12	5.63897e-13	5.23737e-09	clusterTelencephalic neurons_vs_others	Telencephalic neurons
AC092691.1	AC092691.1	2.87156	7.10689	1037.11	6.52144e-13	5.23737e-09	clusterTelencephalic neurons_vs_others	Telencephalic neurons
AP003025.2	AP003025.2	5.26376	2.81917	856.679	1.99923e-12	1.20419e-08	clusterTelencephalic neurons_vs_others	Telencephalic neurons
AP003025.1	AP003025.1	4.90247	2.45697	632.31	1.17865e-11	5.67946e-08	clusterTelencephalic neurons_vs_others	Telencephalic neurons
LRRC7	LRRC7	1.98154	7.4533	519.578	3.69445e-11	1.27158e-07	clusterTelencephalic neurons_vs_others	Telencephalic neurons
DCC1	DCC	1.85934	7.87222	485.676	5.46509e-11	1.64588e-07	clusterTelencephalic neurons_vs_others	Telencephalic neurons
LINC00903	LINC00903	3.11783	3.22916	470.901	6.53692e-11	1.74252e-07	clusterTelencephalic neurons_vs_others	Telencephalic neurons
FOXG1	FOXG1	6.10104	1.13174	456.894	7.78641e-11	1.74252e-07	clusterTelencephalic neurons_vs_others	Telencephalic neurons
ANKS1B1	ANKS1B	1.49431	7.94088	449.057	8.6067e-11	1.74252e-07	clusterTelencephalic neurons_vs_others	Telencephalic neurons
SORBS1	SORBS1	1.95861	6.45832	448.409	8.67899e-11	1.74252e-07	clusterTelencephalic neurons_vs_others	Telencephalic neurons
ARPP21	ARPP21	4.10544	3.73147	428.182	1.32877e-10	2.46261e-07	clusterTelencephalic neurons_vs_others	Telencephalic neurons
LSAMP	LSAMP	1.53667	9.85952	407.065	1.51824e-10	2.61278e-07	clusterTelencephalic neurons_vs_others	Telencephalic neurons
AC092691.3	AC092691.3	2.66396	5.21853	388	2.00238e-10	2.95447e-07	clusterTelencephalic neurons_vs_others	Telencephalic neurons
AC091938.1	AC091938.1	4.73441	2.37512	386.763	2.03959e-10	2.95447e-07	clusterTelencephalic neurons_vs_others	Telencephalic neurons
CDH13	CDH13	2.9245	3.78023	381.709	2.20026e-10	2.95447e-07	clusterTelencephalic neurons_vs_others	Telencephalic neurons
LRRC4C	LRRC4C	2.08076	8.22916	381.498	2.2073e-10	2.95447e-07	clusterTelencephalic neurons_vs_others	Telencephalic neurons
AC069228.11	AC069228.1	2.11221	7.94697	369.947	2.63507e-10	3.3414e-07	clusterTelencephalic neurons_vs_others	Telencephalic neurons
ADARB2	ADARB2	2.45252	5.62249	360.721	3.0474e-10	3.61844e-07	clusterTelencephalic neurons_vs_others	Telencephalic neurons
LHX8	LHX8	7.33687	2.79914	449.819	3.197e-10	3.61844e-07	clusterTelencephalic neurons_vs_others	Telencephalic neurons
HECW1	HECW1	2.76263	5.45813	356.34	3.3041e-10	3.61844e-07	clusterTelencephalic neurons_vs_others	Telencephalic neurons
PPFIA21	PPFIA2	1.90057	8.34653	330.364	5.05056e-10	5.29058e-07	clusterTelencephalic neurons_vs_others	Telencephalic neurons
DSCAM2	DSCAM	2.35403	9.15826	360.704	5.57071e-10	5.46963e-07	clusterTelencephalic neurons_vs_others	Telencephalic neurons
CDH12	CDH12	3.36926	6.87126	412.378	5.67554e-10	5.46963e-07	clusterTelencephalic neurons_vs_others	Telencephalic neurons
LINC02281	LINC02281	5.65678	3.31175	388.343	6.99776e-10	6.4845e-07	clusterTelencephalic neurons_vs_others	Telencephalic neurons
TRMT9B	TRMT9B	3.23999	2.62959	303.43	8.22273e-10	7.33741e-07	clusterTelencephalic neurons_vs_others	Telencephalic neurons
SHISA9	SHISA9	2.9449	4.8223	306.507	9.98077e-10	8.58809e-07	clusterTelencephalic neurons_vs_others	Telencephalic neurons
TUSC7	TUSC7	2.89125	2.87642	288.534	1.09651e-09	8.77347e-07	clusterTelencephalic neurons_vs_others	Telencephalic neurons
NRXN11	NRXN1	1.06239	10.2331	287.837	1.11175e-09	8.77347e-07	clusterTelencephalic neurons_vs_others	Telencephalic neurons
SLC1A2	SLC1A2	2.94517	5.33954	305.923	1.17519e-09	8.77347e-07	clusterTelencephalic neurons_vs_others	Telencephalic neurons
KCNQ5	KCNQ5	2.91656	3.2203	283.641	1.20901e-09	8.77347e-07	clusterTelencephalic neurons_vs_others	Telencephalic neurons
AC068931.1	AC068931.1	3.98921	4.12772	314.265	1.2577e-09	8.77347e-07	clusterTelencephalic neurons_vs_others	Telencephalic neurons
AL135878.1	AL135878.1	5.78385	1.12867	293.437	1.26973e-09	8.77347e-07	clusterTelencephalic neurons_vs_others	Telencephalic neurons
KCTD8	KCTD8	1.79843	4.76079	281.031	1.27453e-09	8.77347e-07	clusterTelencephalic neurons_vs_others	Telencephalic neurons
LHX1-DT	LHX1-DT	3.61555	1.65346	278.852	1.3324e-09	8.8899e-07	clusterTelencephalic neurons_vs_others	Telencephalic neurons
CDH9	CDH9	3.82201	2.35631	277.665	1.36524e-09	8.8899e-07	clusterTelencephalic neurons_vs_others	Telencephalic neurons
U91319.1	U91319.1	2.36101	3.2991	273.523	1.48741e-09	9.43057e-07	clusterTelencephalic neurons_vs_others	Telencephalic neurons
LUZP2	LUZP2	3.56224	8.05003	376.941	1.77321e-09	1.06651e-06	clusterTelencephalic neurons_vs_others	Telencephalic neurons
KCNC22	KCNC2	1.90595	6.56609	257.348	2.10464e-09	1.20661e-06	clusterTelencephalic neurons_vs_others	Telencephalic neurons
RUNX1T1	RUNX1T1	3.06117	6.55671	324.854	2.15349e-09	1.20661e-06	clusterTelencephalic neurons_vs_others	Telencephalic neurons
LINC01551	LINC01551	5.40953	4.65569	349.649	3.49603e-09	1.89147e-06	clusterTelencephalic neurons_vs_others	Telencephalic neurons
ANK11	ANK1	1.74476	5.01124	234.905	3.53281e-09	1.89147e-06	clusterTelencephalic neurons_vs_others	Telencephalic neurons
NTM-AS1	NTM-AS1	4.15261	1.3834	229.366	4.0439e-09	2.07297e-06	clusterTelencephalic neurons_vs_others	Telencephalic neurons
DLGAP21	DLGAP2	1.77634	8.20511	229.417	4.37733e-09	2.19714e-06	clusterTelencephalic neurons_vs_others	Telencephalic neurons
KCND3	KCND3	2.2519	4.62607	218.585	5.30876e-09	2.58878e-06	clusterTelencephalic neurons_vs_others	Telencephalic neurons
RAB27B	RAB27B	1.47379	4.99137	218.124	5.37248e-09	2.58878e-06	clusterTelencephalic neurons_vs_others	Telencephalic neurons
CDH10	CDH10	2.28371	5.94856	230.574	5.56609e-09	2.62949e-06	clusterTelencephalic neurons_vs_others	Telencephalic neurons
FGF141	FGF14	1.61586	8.41223	210.136	6.631e-09	3.07232e-06	clusterTelencephalic neurons_vs_others	Telencephalic neurons
NALCN2	NALCN	1.30844	7.40809	206.834	7.2498e-09	3.13343e-06	clusterTelencephalic neurons_vs_others	Telencephalic neurons
TMEM255A	TMEM255A	2.2458	2.46709	206.665	7.28312e-09	3.13343e-06	clusterTelencephalic neurons_vs_others	Telencephalic neurons
NAV3	NAV3	1.24044	6.34596	203.601	7.92215e-09	3.33731e-06	clusterTelencephalic neurons_vs_others	Telencephalic neurons
DOCK4	DOCK4	1.2759	6.64014	203.094	8.03402e-09	3.33731e-06	clusterTelencephalic neurons_vs_others	Telencephalic neurons
SLC6A1-AS11	SLC6A1-AS1	2.13665	3.85088	200.672	8.59472e-09	3.5097e-06	clusterTelencephalic neurons_vs_others	Telencephalic neurons
AL158840.1	AL158840.1	3.23022	2.5692	199.772	8.81473e-09	3.53956e-06	clusterTelencephalic neurons_vs_others	Telencephalic neurons
GPR137C	GPR137C	1.44367	7.36328	198.511	9.13416e-09	3.60769e-06	clusterTelencephalic neurons_vs_others	Telencephalic neurons
NRG1	NRG1	3.06683	7.65164	268.272	9.78996e-09	3.80435e-06	clusterTelencephalic neurons_vs_others	Telencephalic neurons
CADM1	CADM1	1.04555	8.01552	194.549	1.02294e-08	3.912e-06	clusterTelencephalic neurons_vs_others	Telencephalic neurons
TRHDE	TRHDE	4.02519	3.35719	223.45	1.06502e-08	3.96963e-06	clusterTelencephalic neurons_vs_others	Telencephalic neurons
GRIN2B2	GRIN2B	1.61691	7.27518	190.008	1.16785e-08	4.19955e-06	clusterTelencephalic neurons_vs_others	Telencephalic neurons
AF064866.12	AF064866.1	2.58544	3.20533	188.578	1.21837e-08	4.3168e-06	clusterTelencephalic neurons_vs_others	Telencephalic neurons
AP000844.2	AP000844.2	3.87861	0.0790325	185.274	1.34515e-08	4.67551e-06	clusterTelencephalic neurons_vs_others	Telencephalic neurons
KALRN1	KALRN	0.937146	7.75311	184.95	1.35843e-08	4.67551e-06	clusterTelencephalic neurons_vs_others	Telencephalic neurons
ANKH	ANKH	1.30453	5.25112	183.542	1.41779e-08	4.81109e-06	clusterTelencephalic neurons_vs_others	Telencephalic neurons
ACSL62	ACSL6	1.74788	5.40312	174.786	1.86309e-08	6.23393e-06	clusterTelencephalic neurons_vs_others	Telencephalic neurons
HIP1R	HIP1R	1.30738	5.0633	174.285	1.89313e-08	6.23393e-06	clusterTelencephalic neurons_vs_others	Telencephalic neurons
PLPPR1	PLPPR1	2.83068	5.35333	207.301	1.91471e-08	6.23393e-06	clusterTelencephalic neurons_vs_others	Telencephalic neurons
EPHA7	EPHA7	2.63711	2.77469	171.276	2.08622e-08	6.70178e-06	clusterTelencephalic neurons_vs_others	Telencephalic neurons
CHL1	CHL1	1.38211	6.14975	169.812	2.18841e-08	6.93756e-06	clusterTelencephalic neurons_vs_others	Telencephalic neurons
AC110296.1	AC110296.1	3.55477	4.36822	198.554	2.44503e-08	7.55233e-06	clusterTelencephalic neurons_vs_others	Telencephalic neurons
PRR16	PRR16	2.06858	5.6756	171.053	2.88166e-08	8.67846e-06	clusterTelencephalic neurons_vs_others	Telencephalic neurons
AC090138.1	AC090138.1	2.44853	3.16789	160.437	3.00111e-08	8.78781e-06	clusterTelencephalic neurons_vs_others	Telencephalic neurons
FSTL5	FSTL5	3.253	5.358	207.799	3.02739e-08	8.78781e-06	clusterTelencephalic neurons_vs_others	Telencephalic neurons
TANC2	TANC2	0.793471	8.96772	159.54	3.09596e-08	8.87988e-06	clusterTelencephalic neurons_vs_others	Telencephalic neurons
SH3GL32	SH3GL3	1.75913	5.88379	158.682	3.19002e-08	8.94538e-06	clusterTelencephalic neurons_vs_others	Telencephalic neurons
GABBR21	GABBR2	1.58567	5.7569	158.655	3.19306e-08	8.94538e-06	clusterTelencephalic neurons_vs_others	Telencephalic neurons
CTNNA3	CTNNA3	1.16688	7.39245	157.793	3.29099e-08	9.11376e-06	clusterTelencephalic neurons_vs_others	Telencephalic neurons
TSHZ1	TSHZ1	1.50599	3.5614	156.471	3.4481e-08	9.44035e-06	clusterTelencephalic neurons_vs_others	Telencephalic neurons
SNTG2	SNTG2	1.53293	4.17928	155.232	3.60331e-08	9.75445e-06	clusterTelencephalic neurons_vs_others	Telencephalic neurons
LINC00290	LINC00290	1.92779	3.81021	154.836	3.65469e-08	9.78362e-06	clusterTelencephalic neurons_vs_others	Telencephalic neurons
GFRA2	GFRA2	1.67532	4.10787	153.169	3.88042e-08	1.013e-05	clusterTelencephalic neurons_vs_others	Telencephalic neurons
ADCY2	ADCY2	2.92887	5.66284	194.927	3.95172e-08	1.013e-05	clusterTelencephalic neurons_vs_others	Telencephalic neurons
SEMA6D	SEMA6D	1.15796	7.93827	152.662	3.95228e-08	1.013e-05	clusterTelencephalic neurons_vs_others	Telencephalic neurons
KCNIP4	KCNIP4	2.70787	8.46019	211.635	4.08071e-08	1.02413e-05	clusterTelencephalic neurons_vs_others	Telencephalic neurons
LHX1	LHX1	6.6439	-1.54848	224.489	4.15251e-08	1.03141e-05	clusterTelencephalic neurons_vs_others	Telencephalic neurons
CHST8	CHST8	1.96657	3.62892	150.855	4.2213e-08	1.0327e-05	clusterTelencephalic neurons_vs_others	Telencephalic neurons
ONECUT1	ONECUT1	4.54993	2.70816	168.537	4.24343e-08	1.0327e-05	clusterTelencephalic neurons_vs_others	Telencephalic neurons
NALCN-AS1	NALCN-AS1	1.76806	3.00723	150.294	4.30904e-08	1.03818e-05	clusterTelencephalic neurons_vs_others	Telencephalic neurons
LINC005992	LINC00599	1.65819	5.14174	149.525	4.43303e-08	1.05188e-05	clusterTelencephalic neurons_vs_others	Telencephalic neurons
RYR2	RYR2	1.30562	5.52221	148.878	4.54055e-08	1.05188e-05	clusterTelencephalic neurons_vs_others	Telencephalic neurons
AKAP6	AKAP6	1.75808	9.15499	169.759	4.54564e-08	1.05188e-05	clusterTelencephalic neurons_vs_others	Telencephalic neurons
KIAA0319	KIAA0319	1.7486	5.17843	148.604	4.58695e-08	1.05188e-05	clusterTelencephalic neurons_vs_others	Telencephalic neurons
DDC1	DDC	2.61299	2.23343	148.483	4.60753e-08	1.05188e-05	clusterTelencephalic neurons_vs_others	Telencephalic neurons
LMO3	LMO3	2.61925	5.11297	174.813	4.62789e-08	1.05188e-05	clusterTelencephalic neurons_vs_others	Telencephalic neurons
AL354771.1	AL354771.1	3.50778	4.16983	179.3	4.68862e-08	1.05573e-05	clusterTelencephalic neurons_vs_others	Telencephalic neurons
PPFIA2-AS11	PPFIA2-AS1	1.87851	5.8903	152.712	4.75164e-08	1.06001e-05	clusterTelencephalic neurons_vs_others	Telencephalic neurons
SEMA3E	SEMA3E	2.1802	2.56058	143.449	5.57326e-08	1.22835e-05	clusterTelencephalic neurons_vs_others	Telencephalic neurons
AP001136.1	AP001136.1	4.35081	0.0228881	143.286	5.60819e-08	1.22835e-05	clusterTelencephalic neurons_vs_others	Telencephalic neurons
AC084361.12	AC084361.1	1.49325	6.6885	142.751	5.72502e-08	1.24264e-05	clusterTelencephalic neurons_vs_others	Telencephalic neurons
PCDH91	PCDH9	1.27736	10.0264	140.673	6.66158e-08	1.42033e-05	clusterTelencephalic neurons_vs_others	Telencephalic neurons
AC091885.2	AC091885.2	2.27653	5.42767	154.012	6.83803e-08	1.44516e-05	clusterTelencephalic neurons_vs_others	Telencephalic neurons
AP000462.1	AP000462.1	1.06968	6.59335	137.546	7.02241e-08	1.45862e-05	clusterTelencephalic neurons_vs_others	Telencephalic neurons
LINC02336	LINC02336	2.15505	2.24018	137.545	7.0228e-08	1.45862e-05	clusterTelencephalic neurons_vs_others	Telencephalic neurons
[truncated: 98 more rows]

## Sheet: d50_d70_neurons_DEG
	gene	logFC	logCPM	F	PValue	FDR	comparison	cluster
[truncated: 2,200 more rows]
